# Supplementary material for: Modular assembly of amines and diborons with photocatalysis enabled halogen atom transfer of organohalides for C(sp3)–C(sp3) bond formation
Source: Royal Society of Chemistry journal article supplement (doi:10.1039/d5sc00190k), 2025-01-01

## *Electronic Supplementary Information*

### **Modular Assembly of Amines and Diborons with Photocatalysis Enabled Halogen Atom Transfer of Organohalides for C(sp<sup>3</sup>)-C(sp<sup>3</sup>) Bond Formation**

Rong-Bin Liang,<sup>1,#</sup> Ting-Ting Miao,<sup>1,#</sup> Xiang-Rui Li,<sup>1</sup> Jia-Bo Huang,<sup>1</sup> Shao-Fei Ni,<sup>\*,1</sup>  
Sanliang Li,<sup>1</sup> Qing-Xiao Tong,<sup>1</sup> and Jian-Ji Zhong<sup>\*,1,2</sup>

<sup>1</sup>College of Chemistry and Chemical Engineering, and Key (Guangdong-Hong Kong Joint) Laboratory for Preparation and Application of Ordered Structural Materials of Guangdong Province, Shantou University, Shantou 515063, P. R. China

<sup>2</sup>Chemistry and Chemical Engineering Guangdong Laboratory, Shantou 515063, P. R. China

<sup>#</sup>These two authors contributed equally to this work

\*E-mail: sfni@stu.edu.cn; jjzhong@stu.edu.cn

# Table of Contents

|                                                               |    |
|---------------------------------------------------------------|----|
| <i>Electronic Supplementary Information</i> .....             | 1  |
| Table of Contents .....                                       | 2  |
| 1. Experimental section.....                                  | 3  |
| 1) General information.....                                   | 3  |
| 2) Preparation of $\alpha$ -trifluoromethyl arylalkenes ..... | 4  |
| 3) General procedure for the photochemical reactions .....    | 5  |
| 4) Stern-Volmer Quenching Experiments .....                   | 6  |
| 5) Cyclic Voltammetry experiments .....                       | 7  |
| 6) Radical-trapping experiment .....                          | 8  |
| 7) Radical-clock experiment .....                             | 9  |
| 8) Deuterium labeling experiments.....                        | 10 |
| 9) $^{11}\text{B}$ NMR monitoring experiments .....           | 11 |
| 10) Computational studies .....                               | 12 |
| 11) References .....                                          | 30 |
| 2. Characterization data of the products .....                | 32 |
| 3. NMR spectra for the products.....                          | 59 |

## 1. Experimental section

### 1) General information

All chemicals, unless otherwise noted, were purchased from commercial sources and were used without further purification. Unless stated otherwise, all reactions were carried out under argon atmosphere. The substrates  $\alpha$ -trifluoromethyl arylalkenes (**S**) were synthesized according to the literature methods with slight modification.<sup>[1-4]</sup> Irradiation with visible light was performed using blue LEDs ( $\lambda = 450 \pm 10$  nm) illumination instruments (The instruments were designed by ourselves and the actual output power density of the LEDs at 0.5 cm distance is 33.70 mW/cm<sup>2</sup> detected by CEL-NP2000-10 (Beijing Ceau Light Co. Ltd., China) light power meter). For irradiation, the material of the reaction vessel is common glass; the distance from the light source is about 0.5 cm.

The nuclear magnetic resonance spectra were recorded on the Bruker Ascend<sup>TM</sup> 400 MHz NMR spectrometer with tetramethylsilane (TMS) as an internal standard. High resolution mass spectra were recorded using a Q Exactive mass spectrometer (Thermo Fisher Scientific, USA).

## 2) Preparation of $\alpha$ -trifluoromethyl arylalkenes

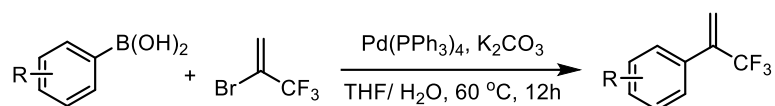

Arylboronic acid (10.0 mmol), Pd(PPh<sub>3</sub>)<sub>4</sub> (0.3 mmol, 3 mol%), K<sub>2</sub>CO<sub>3</sub> (20.0 mmol, 2.0 equiv.) were dissolved in co-solvents (THF/ H<sub>2</sub>O = 2:3, (v/v), 50.0 mL) in a two-neck flask under argon atmosphere. Then, 2-bromo-3,3,3-trifluoroprop-1-ene (20.0 mmol, 2.1 mL) was added dropwise into the mixture. The mixture was heated to 60 °C in an oil bath for at least 12 h. Then the mixed solution was extracted with ethyl acetate (3 × 15.0 mL). The organic layer was washed with brine (20.0 mL), dried over Na<sub>2</sub>SO<sub>4</sub>, and then concentrated under reduced pressure. The resulting residue was purified by silica gel column chromatography (petroleum ether/ethyl acetate = 200/1) to afford the desired products.

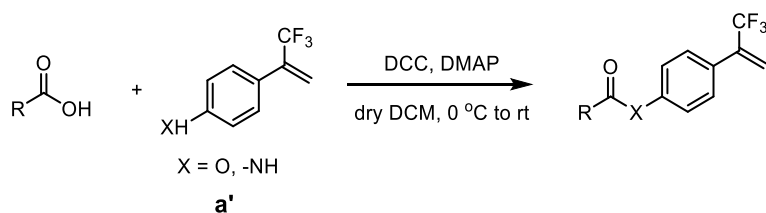

To a solution of carboxylic acid (5.0 mmol), 4-dimethylaminopyridine (DMAP) (20 mol%, 1.0 mmol, 122 mg) and **a'** (5.5 mmol, 1.1 equiv.) in dry DCM (15 mL) at 0 °C, followed by adding *N,N'*-dicyclohexylcarbodiimide (DCC) (5.5 mmol, 1.14 g, 1.1 equiv.). After stirring for 5 min at 0 °C, the reaction mixture was stirred at room temperature for 12h. Upon completion, the resulting mixture was filtered through a pad of Celite. The filtrate was concentrated under reduced pressure. The resulting residue was purified by silica gel column chromatography to afford the desired products.



### 3) General procedure for the photochemical reactions

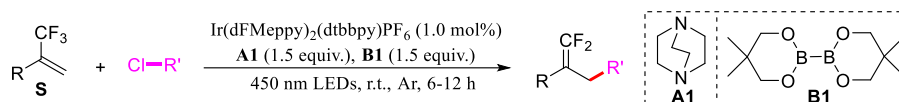

**S** (1.0 equiv., 0.2 mmol), Ir(dFMeppy)<sub>2</sub>(dtbbpy)PF<sub>6</sub> (2.0 mg, 1.0 mol%), **A1** (1.5 equiv., 0.3 mmol), **B1** (1.5 equiv., 0.3 mmol) were dissolved in **Cl-R'** (2.0 mL) in a 10.0 mL tube equipped with magnetic stirring bar, then the reaction tube was irradiated by blue LEDs ( $\lambda = 450 \pm 10$  nm) at room temperature for 6-12 h. After reaction, the solvent was removed by rotary evaporation and purified by column-chromatography on silica gel using hexane/ ethyl acetate as the eluent to afford the desired products.

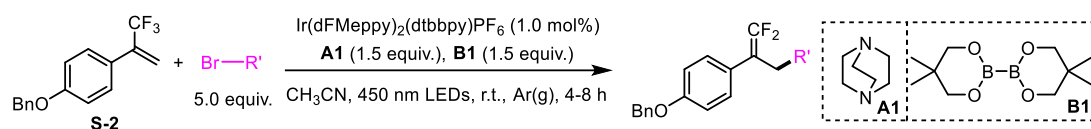

**S-2** (1.0 equiv., 0.2 mmol), **Br-R'** (5.0 equiv., 1.0 mmol), Ir(dFMeppy)<sub>2</sub>(dtbbpy)PF<sub>6</sub> (2.0 mg, 1.0 mol%), **A1** (1.5 equiv., 0.3 mmol), **B1** (1.5 equiv., 0.3 mmol) were dissolved in 3.0 mL CH<sub>3</sub>CN in a 10.0 mL flask equipped with magnetic stirring bar, then the reaction tube was irradiated by blue LEDs ( $\lambda = 450 \pm 10$  nm) at room temperature for 4-8 h. After reaction, the solvent was removed by rotary evaporation and purified by column-chromatography on silica gel using hexane/ ethyl acetate as the eluent to afford the desired products.

#### 4) Stern-Volmer Quenching Experiments

All Stern-Volmer quenching experiments were carried out on Fluorescence spectrometer (PTI QM-TM) under an argon atmosphere. Stern-Volmer quenching experiments were measured with excitation at 400 nm. The acetonitrile solution of  $1.0 \times 10^{-5}$  M  $\text{Ir}(\text{dFMeppy})_2(\text{dtbbpy})\text{PF}_6$  and  $1.0 \times 10^{-3}$  M **DCM**, **S-1**, **A1**, **B1** or **(A1+B1)**, respectively, were prepared. The experiments were conducted in 1.25 cm x 1.25 cm x 4.5 cm quartz cuvette at room temperature. Appropriate volume (the whole solution volume change < 5%) of quenchers were respectively injected to the acetonitrile solution (3.0 mL) of  $1.0 \times 10^{-5}$  M  $\text{Ir}(\text{dFMeppy})_2(\text{dtbbpy})\text{PF}_6$  in the quartz cuvette by microsyringe.

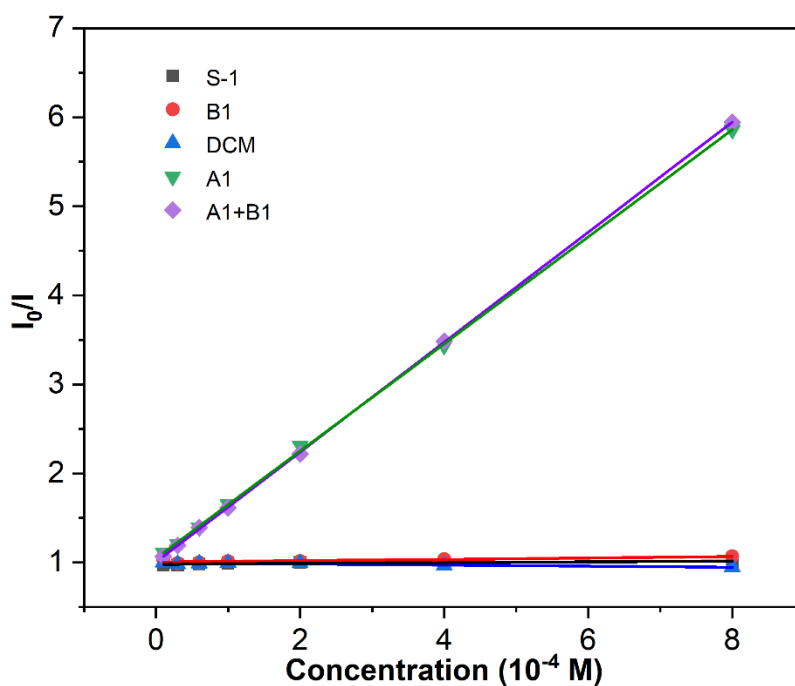

**Figure S1.**  $\text{Ir}(\text{dFMeppy})_2(\text{dtbbpy})\text{PF}_6$  emission quenching by **S-1**, **A1**, **B1**, **(A1+B1)** and **DCM**

## 5) Cyclic Voltammetry experiments

All Cyclic Voltammetry studies were performed using a Shanghai Chenhua CHI-760E workstation under an argon atmosphere. Polish the glass carbon electrode with aluminum oxide. A glassy-carbon (GC) electrode (5 mm-diameter, disk-electrode) was used as the working electrode, Pt wire was used as the counter electrode and an Ag/AgCl electrode was used as the reference electrode.

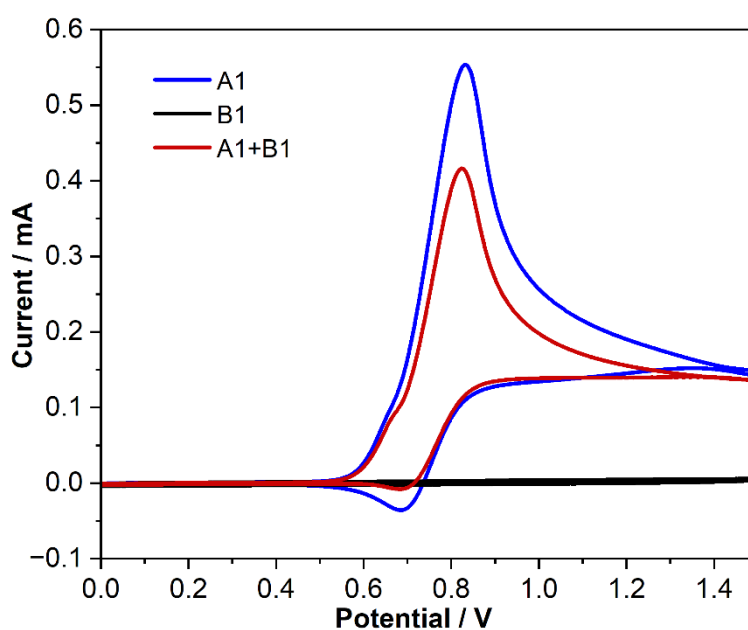

**Figure S2.** Cyclic voltammograms study for **A1**, **B1** and **(A1+B1)**

## 6) Radical-trapping experiment

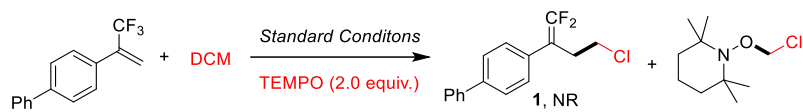

detected by HRMS  
HRMS (ES<sup>+</sup>) Calcd [M+H]<sup>+</sup> : 206.1306  
Found : 206.1305

ZLM-1 #26-30 RT: 0.26-0.28 AV: 2 SB: 2 0.02-0.06 NL: 4.18E5  
T: FTMS + p ESI Full ms [100.0000-600.0000]

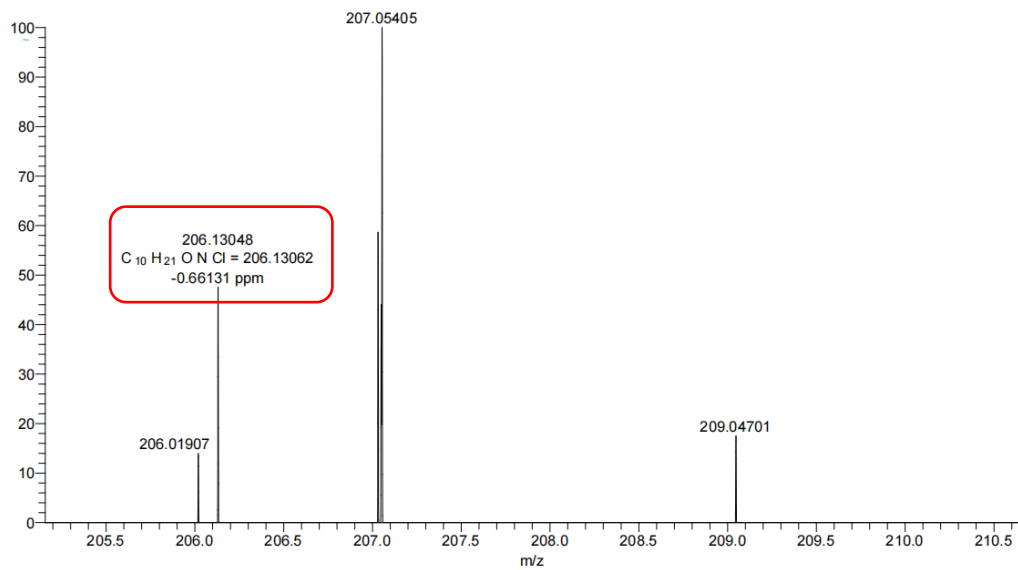

## 7) Radical-clock experiment

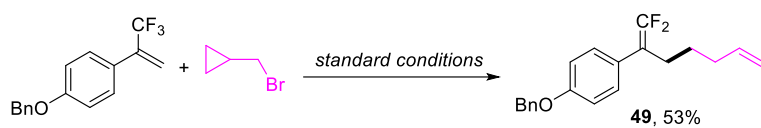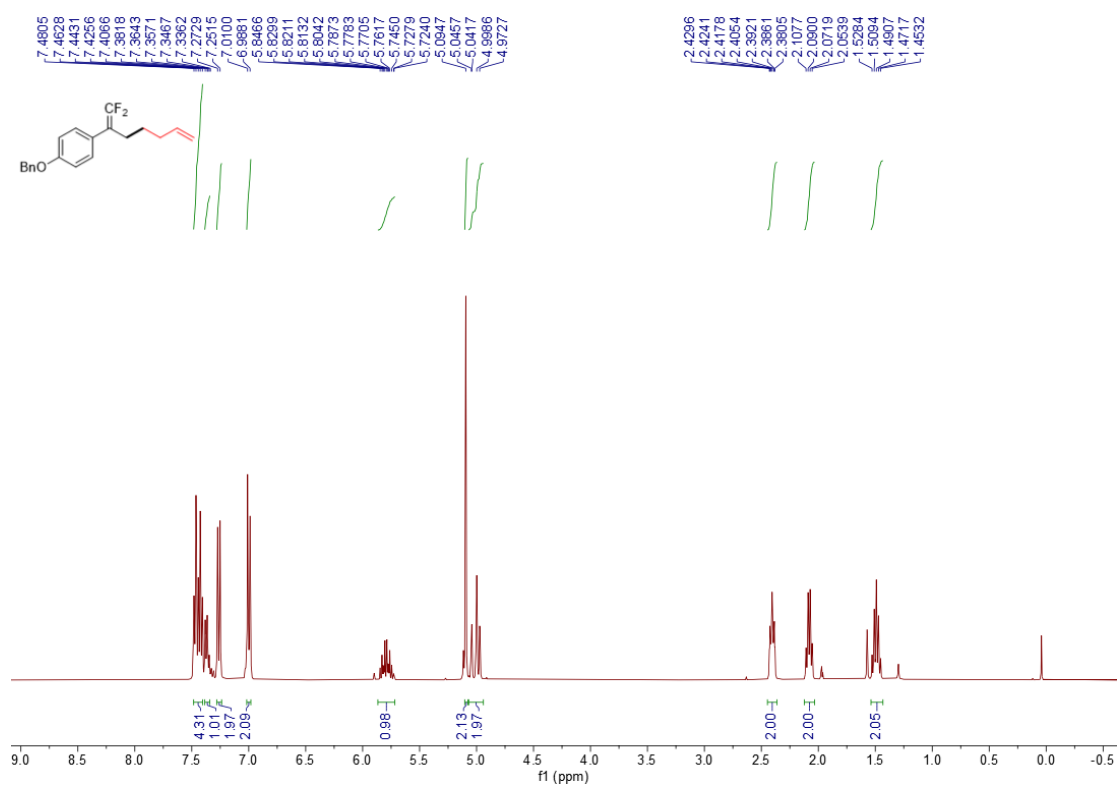

## 8) Deuterium labeling experiments

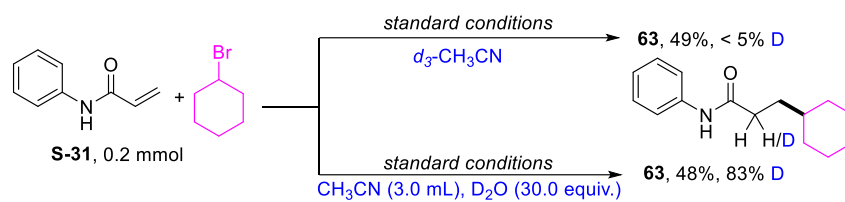

With  $d_3\text{-CH}_3\text{CN}$

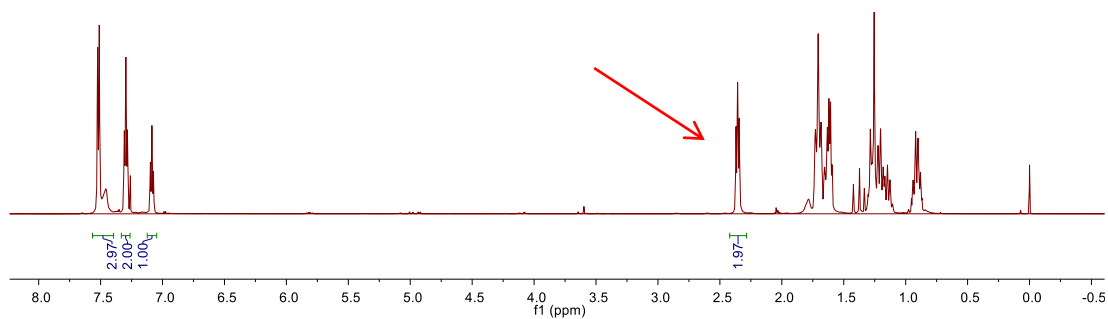

With  $\text{D}_2\text{O (30.0 equiv.)}$

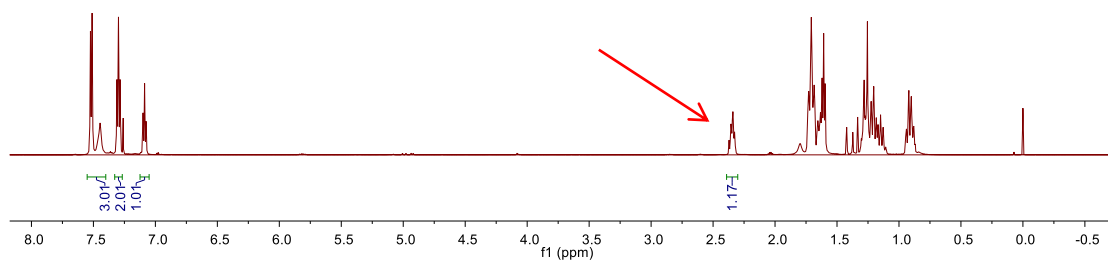

## 9) $^{11}\text{B}$ NMR monitoring experiments

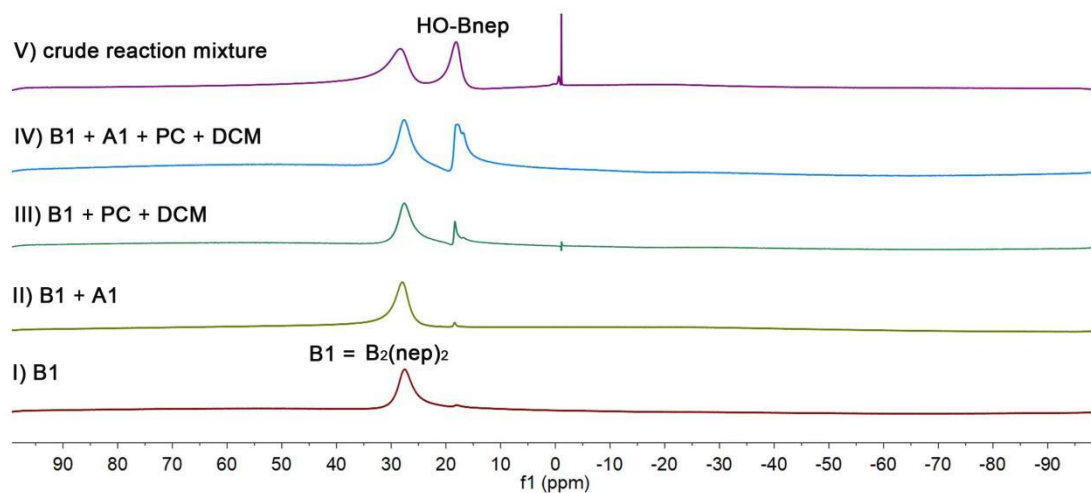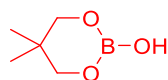

Zoom in  $[\text{C}_5\text{H}_{11}\text{BO}_3+\text{H}]^+$   
 1 #13-26 RT: 0.12-0.23 AV: 7 NL: 1.78E6  
 T: FTMS + p ESI Full ms [100.0000-600.0000]

detected by HRMS  
 HRMS ( $\text{ES}^+$ ) Calcd  $[\text{M}+\text{H}]^+$  : 131.0874  
 Found : 131.0872

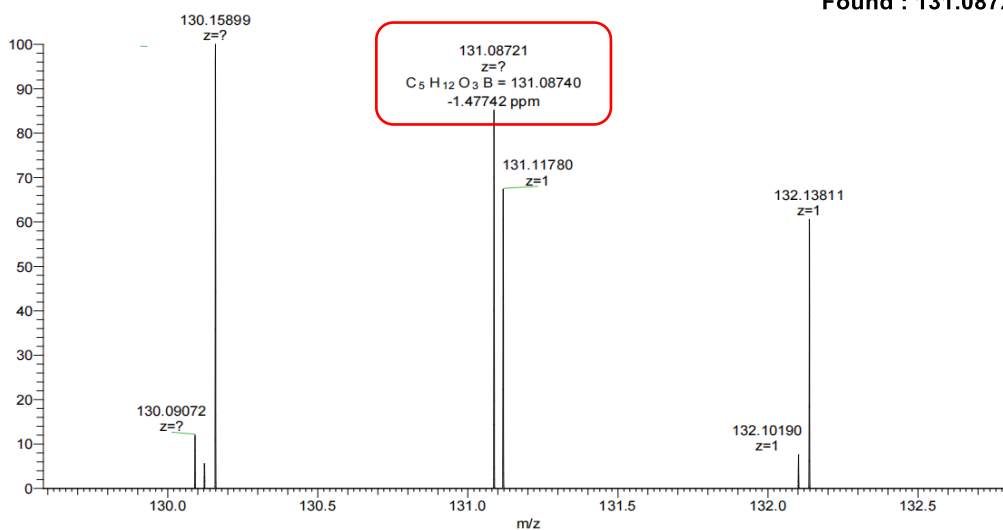

## 10) Computational studies

All calculations were performed using Gaussian 16, Revision A.03 package.<sup>[5]</sup> All of the reactants, intermediates, transition states, products were optimized by the DFT with the B3LYP-D3 functional.<sup>[6-11]</sup> For geometry optimizations and frequency calculations, BS-I basis set system was employed. In BS-I, we employed 6-31G(d) basis sets for H, B, C, N and O. All the stationary structures were characterized with no imaginary frequency and the transition state structures (TSS) were characterized with a single imaginary frequency. Intrinsic reaction coordinate (IRC) calculations were performed on the TSS. The solvent effect of dichloromethane (DCM) was evaluated through the SMD method,<sup>[12]</sup> in which a better basis system BS-II was used. In BS-II, we employed 6-311++G(d,p) basis sets for H, B, C, N and O. All reported energies are free energies at a concentration of 1 M and a temperature of 298.15 K. A method developed by Whitesides *et al.*<sup>[13]</sup> was used to estimate the entropic contributions. This method was designed to better describe the suppression of the translational entropy upon moving from gas phase to a solvent for each species.<sup>[14,15]</sup> Three-dimensional structures and the orbitals' diagrams of molecules were visualized using GaussView 6.0.16.<sup>[16]</sup>



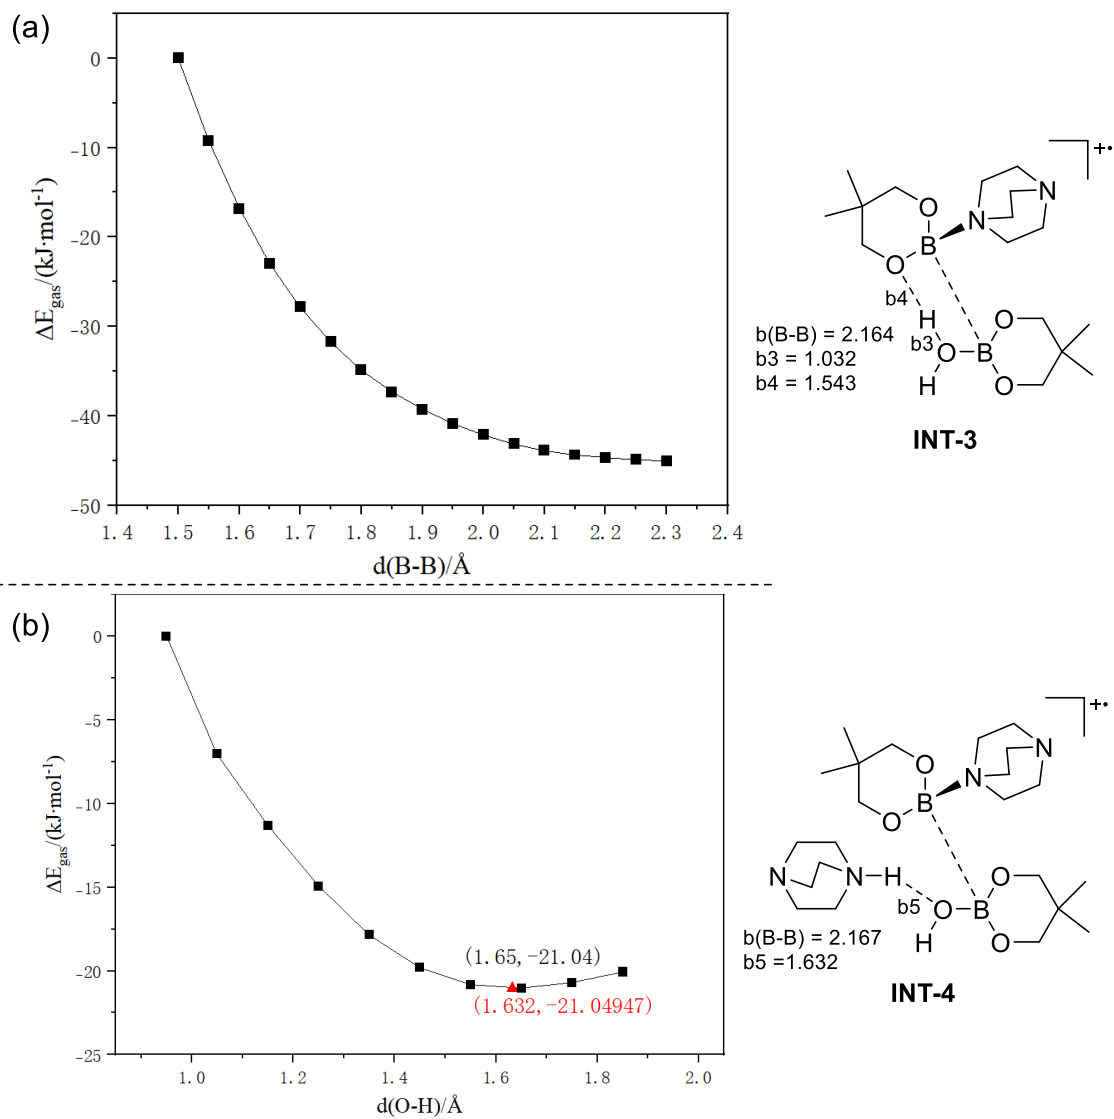

**Figure S3.** Graph sheets of potential energy scan.

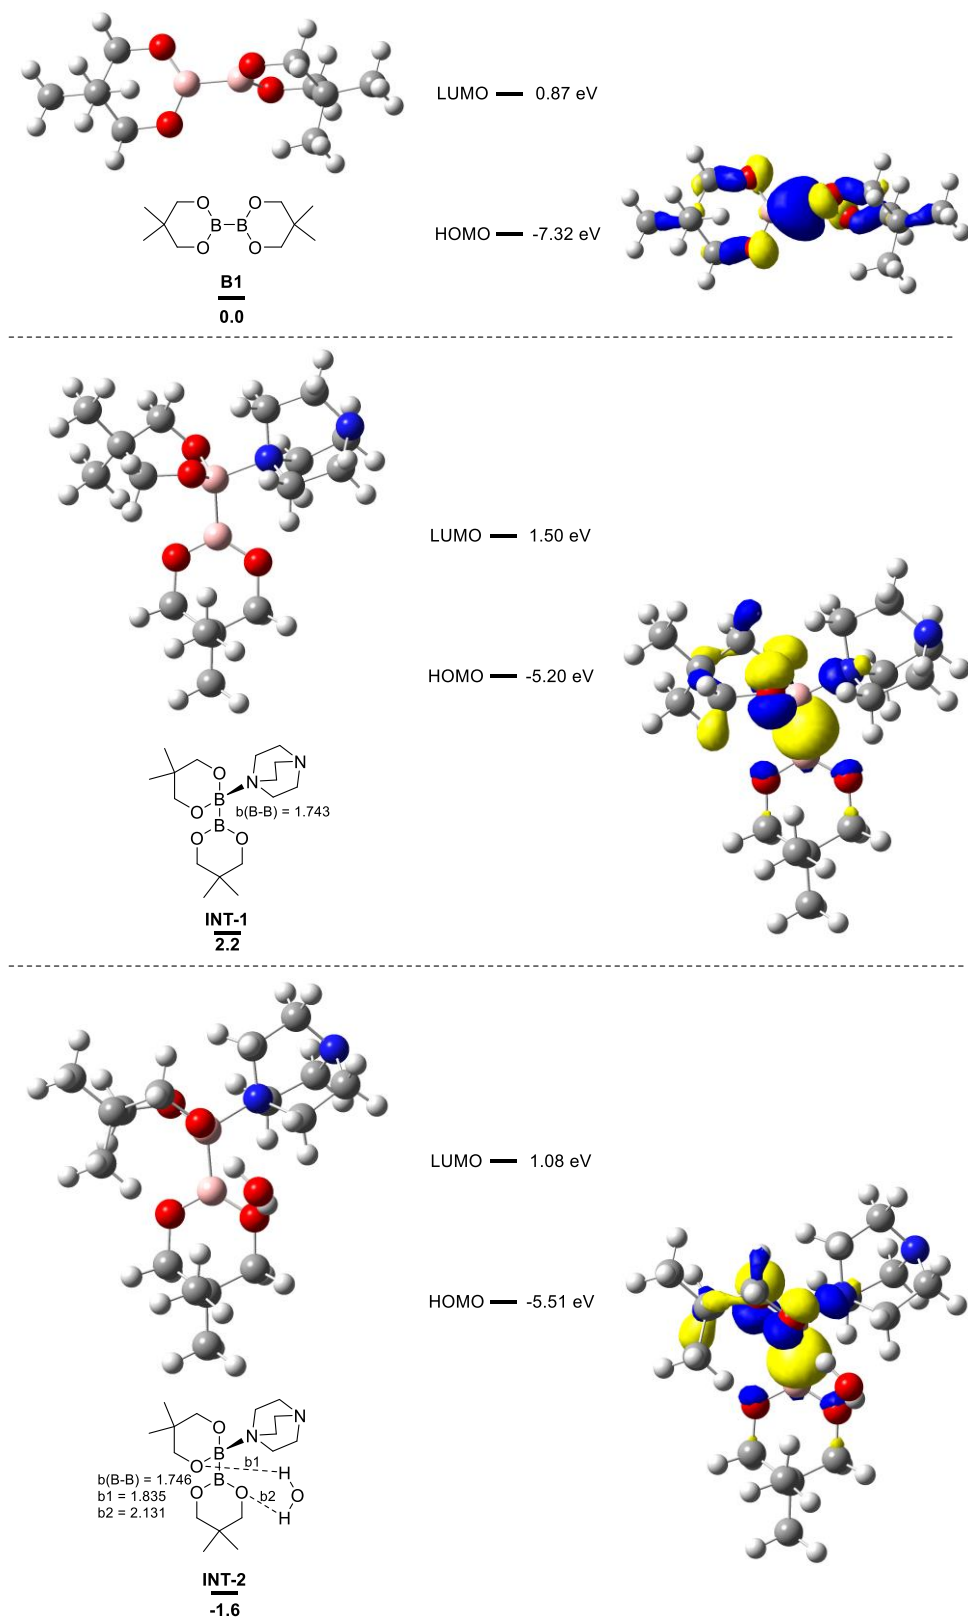

**Figure S4.** Three-dimensional structures and HOMO orbitals' energy values and diagrams of **B1**, **INT-1** and **INT-2**.

**Cartesian coordinates of the optimized structures:**

**B1**

E = -743.923192661 a.u.

0 1

|   |             |            |             |
|---|-------------|------------|-------------|
| C | -2.81404300 | 1.54211200 | 0.27547800  |
| C | -2.71847400 | 3.89573300 | -0.45675700 |
| C | -3.30055800 | 2.51665500 | -0.81032100 |
| H | -3.28575800 | 1.78621800 | 1.23829800  |
| H | -2.92149200 | 4.61598000 | -1.25844100 |
| H | -3.18714800 | 4.27725000 | 0.46181300  |
| H | -3.09070600 | 0.51216300 | 0.02010400  |
| C | 3.01053800  | 3.48131900 | 1.51979200  |
| C | 3.20103500  | 1.99603000 | -0.44052800 |
| C | 3.75416700  | 3.28639000 | 0.18774700  |
| H | 3.30363200  | 2.69661600 | 2.23216100  |
| H | 3.26741600  | 4.44960100 | 1.96587800  |
| H | 3.59652400  | 1.86178900 | -1.45455200 |
| H | 3.50907900  | 1.12538700 | 0.15619900  |
| B | -0.68658100 | 2.71664900 | 0.17689300  |
| B | 1.01709300  | 2.71385600 | 0.35713700  |
| O | -1.30263900 | 3.86233900 | -0.26471000 |
| O | -1.39490600 | 1.57052600 | 0.44171400  |
| O | 1.77516400  | 1.99890300 | -0.53802000 |
| O | 1.59022900  | 3.45017200 | 1.36445600  |
| C | -4.83359100 | 2.58464600 | -0.79342100 |
| H | -5.20043200 | 3.29284400 | -1.54615200 |
| H | -5.26944200 | 1.60415900 | -1.02003500 |
| H | -5.21320600 | 2.90488300 | 0.18468000  |
| C | -2.80628000 | 2.06439500 | -2.19605200 |
| H | -3.20984300 | 1.07572000 | -2.44466400 |
| H | -3.13305600 | 2.76870500 | -2.97025200 |
| H | -1.71504900 | 2.00088000 | -2.23755300 |
| C | 3.50674000  | 4.48622500 | -0.74409800 |
| H | 3.88848300  | 5.40941100 | -0.29227300 |
| H | 4.01827100  | 4.34104300 | -1.70299700 |
| H | 2.44173400  | 4.62896900 | -0.94886900 |
| C | 5.25703700  | 3.12661400 | 0.45418100  |
| H | 5.80341100  | 2.96264700 | -0.48247100 |
| H | 5.66732100  | 4.02854300 | 0.92414500  |
| H | 5.46185000  | 2.27728700 | 1.11753400  |

**A1**

E = -345.339880758 a.u.

0 1

|   |             |             |             |
|---|-------------|-------------|-------------|
| C | -0.72408100 | -0.50704600 | 0.00012900  |
| C | -1.25631200 | 0.96507400  | 0.00065600  |
| H | -1.06580100 | -1.05899200 | -0.88341500 |
| H | -1.06569100 | -1.05960900 | 0.88333000  |
| H | -1.87279500 | 1.17122100  | -0.88224900 |
| H | -1.87150100 | 1.17103900  | 0.88450500  |
| C | 1.22780300  | 0.19859500  | -1.19852600 |
| H | 2.32371600  | 0.16632200  | -1.19767100 |
| H | 0.88494500  | -0.35430700 | -2.08102500 |
| C | 0.69521000  | 1.67061600  | -1.19871400 |
| H | 1.51679700  | 2.39660200  | -1.19849000 |
| H | 0.07760100  | 1.87583200  | -2.08105100 |
| C | 0.69629600  | 1.67099400  | 1.19802600  |
| H | 1.51830200  | 2.39650200  | 1.19635100  |
| H | 0.07978200  | 1.87722400  | 2.08089300  |
| C | 1.22806200  | 0.19867400  | 1.19832300  |
| H | 2.32395700  | 0.16576500  | 1.19771800  |
| H | 0.88468900  | -0.35379300 | 2.08089300  |
| N | 0.75015400  | -0.51481000 | -0.00002800 |
| N | -0.12784700 | 1.91372500  | -0.00001000 |

### INT-1

E = -1089.28124878 a.u.

0 1

|   |             |             |             |
|---|-------------|-------------|-------------|
| C | 3.40097700  | 0.08882900  | 0.50905600  |
| C | 2.73807800  | 1.08369200  | -1.63818900 |
| C | 3.36068600  | 1.41136200  | -0.27258600 |
| H | 4.11898900  | -0.60106700 | 0.04203300  |
| H | 3.72860300  | 0.26096400  | 1.54164000  |
| H | 2.57940500  | 2.00003900  | -2.22040700 |
| H | 3.41498700  | 0.43516800  | -2.21308700 |
| B | 1.17157600  | -0.36439300 | -0.41425700 |
| O | 1.47042200  | 0.43358700  | -1.51456700 |
| O | 2.12465600  | -0.54401400 | 0.56819200  |
| C | 2.50268300  | 2.44880300  | 0.47378000  |
| H | 2.94096000  | 2.67648900  | 1.45259900  |
| H | 2.44436100  | 3.38359500  | -0.09681300 |
| H | 1.48286200  | 2.08921900  | 0.63978600  |
| C | 4.78599800  | 1.94451700  | -0.46796000 |
| H | 4.77854900  | 2.87805100  | -1.04368000 |
| H | 5.25858700  | 2.15449800  | 0.49908200  |
| H | 5.41713200  | 1.22343200  | -1.00192300 |
| C | -0.65391500 | -0.83232900 | 2.30372400  |

|   |             |             |             |
|---|-------------|-------------|-------------|
| C | -1.04020900 | -3.02634500 | 1.14247300  |
| C | -0.54858800 | -2.38969200 | 2.45995000  |
| H | -1.38355100 | -0.43226100 | 3.01987800  |
| H | 0.32023700  | -0.37474700 | 2.53554100  |
| H | -0.85094000 | -4.10834100 | 1.16483800  |
| H | -2.13238200 | -2.89070900 | 1.06896900  |
| B | -0.39853300 | -1.05308800 | -0.09920800 |
| O | -0.37178200 | -2.49975900 | 0.01183100  |
| O | -1.08532700 | -0.42019400 | 1.01804100  |
| C | 0.91045300  | -2.80451200 | 2.71524000  |
| H | 1.29554900  | -2.33097900 | 3.62783100  |
| H | 0.98990900  | -3.89212800 | 2.84318100  |
| H | 1.54605100  | -2.50083000 | 1.88032100  |
| C | -1.43816400 | -2.87424300 | 3.61522800  |
| H | -1.39661100 | -3.96645700 | 3.71816300  |
| H | -1.11252400 | -2.43977700 | 4.56874800  |
| H | -2.48637700 | -2.58884800 | 3.45839700  |
| C | -2.82066800 | -1.32025900 | -1.12949200 |
| C | -3.81686200 | -0.90047600 | -2.24744100 |
| H | -2.65610900 | -2.39849600 | -1.10312500 |
| H | -3.12644500 | -0.99467200 | -0.13444900 |
| H | -4.32295700 | -1.77805000 | -2.66490500 |
| H | -4.59095500 | -0.23230200 | -1.85420700 |
| C | -0.95284400 | -1.25780900 | -2.67940600 |
| H | -0.01668700 | -0.73970100 | -2.88936300 |
| H | -0.72877600 | -2.30996300 | -2.48928200 |
| C | -2.01089600 | -1.04734600 | -3.80203800 |
| H | -1.55429600 | -0.57236100 | -4.67736200 |
| H | -2.43350200 | -2.00297800 | -4.13147200 |
| C | -2.56349000 | 1.05370000  | -2.79804100 |
| H | -1.98236600 | 1.53338200  | -3.59339100 |
| H | -3.39352600 | 1.72406100  | -2.54869100 |
| C | -1.67586700 | 0.78410900  | -1.54810400 |
| H | -0.68630700 | 1.23202000  | -1.63732700 |
| H | -2.12704200 | 1.13196500  | -0.61722000 |
| N | -1.48113200 | -0.69589100 | -1.39374800 |
| N | -3.11994600 | -0.19842000 | -3.33588100 |

## H<sub>2</sub>O

E = -76.4070324119 a.u.

0 1

|   |             |            |            |
|---|-------------|------------|------------|
| O | -1.83875200 | 0.17257000 | 0.02385400 |
| H | -0.87132900 | 0.22001500 | 0.02385400 |
| H | -2.11696100 | 1.10034100 | 0.02385400 |

**INT-2**

E = -1165.71707929 a.u.

0 1

|   |             |             |             |
|---|-------------|-------------|-------------|
| C | 3.52152300  | -0.49593100 | -0.20090100 |
| C | 2.64997900  | 1.39902000  | -1.50729500 |
| C | 3.60179300  | 1.03029600  | -0.35970700 |
| H | 3.98221700  | -0.98947200 | -1.06885700 |
| H | 4.06696700  | -0.81792800 | 0.69411000  |
| H | 2.56722500  | 2.48733600  | -1.60782600 |
| H | 3.02886600  | 0.99926800  | -2.45842700 |
| B | 1.10592500  | -0.28177700 | -0.58264000 |
| O | 1.32136400  | 0.89339200  | -1.29968100 |
| O | 2.18127600  | -0.97044900 | -0.07210700 |
| C | 3.18103100  | 1.74560100  | 0.93786700  |
| H | 3.78787200  | 1.39723100  | 1.78190000  |
| H | 3.33066400  | 2.82745900  | 0.83905900  |
| H | 2.12671700  | 1.59486600  | 1.18526400  |
| C | 5.03726200  | 1.42604900  | -0.73513600 |
| H | 5.11488900  | 2.50890300  | -0.88908600 |
| H | 5.73512600  | 1.15476400  | 0.06600200  |
| H | 5.36910500  | 0.92841300  | -1.65493100 |
| C | -1.45266700 | -1.08412000 | 2.06120000  |
| C | -0.02239600 | -2.92408900 | 1.14715300  |
| C | -0.37408700 | -2.11566500 | 2.44129000  |
| H | -2.37703800 | -1.61174500 | 1.77679800  |
| H | -1.68739900 | -0.44892800 | 2.92456300  |
| H | 1.06809100  | -3.03613500 | 1.06621100  |
| H | -0.45656800 | -3.93045700 | 1.21265300  |
| B | -0.47065800 | -0.91072100 | -0.17164900 |
| O | -0.53869300 | -2.34882800 | -0.04193300 |
| O | -1.01603100 | -0.23121700 | 1.01326200  |
| C | 0.86555800  | -1.38521400 | 2.98794400  |
| H | 0.61375800  | -0.80875900 | 3.88723600  |
| H | 1.64923900  | -2.10465300 | 3.25627200  |
| H | 1.28046500  | -0.70170800 | 2.24495100  |
| C | -0.93061600 | -3.05877200 | 3.51911100  |
| H | -0.19561000 | -3.83094700 | 3.77810400  |
| H | -1.17386700 | -2.51176400 | 4.43889300  |
| H | -1.84088300 | -3.56628600 | 3.17529700  |
| C | -2.95316700 | -1.14760800 | -1.00460300 |
| C | -3.93490200 | -1.04989000 | -2.20518000 |
| H | -2.80005600 | -2.16905400 | -0.65561200 |
| H | -3.26746000 | -0.53632000 | -0.15684800 |

|   |             |             |             |
|---|-------------|-------------|-------------|
| H | -4.17496100 | -2.04400900 | -2.59809800 |
| H | -4.87665600 | -0.58264800 | -1.89731100 |
| C | -1.18216900 | -1.32801300 | -2.67144500 |
| H | -0.16216100 | -1.00426800 | -2.89451100 |
| H | -1.15348800 | -2.39311000 | -2.43556600 |
| C | -2.17631200 | -0.97556200 | -3.81668700 |
| H | -1.69696500 | -0.34024300 | -4.56933200 |
| H | -2.51800000 | -1.88455600 | -4.32358400 |
| C | -2.90828900 | 1.03421000  | -2.74365600 |
| H | -2.58890600 | 1.67900700  | -3.56958500 |
| H | -3.77345000 | 1.51210000  | -2.27182000 |
| C | -1.74957800 | 0.84182200  | -1.72436700 |
| H | -0.79141300 | 1.17349100  | -2.12388000 |
| H | -1.90960700 | 1.36669700  | -0.78133800 |
| N | -1.60519000 | -0.62311800 | -1.41747100 |
| N | -3.35007500 | -0.25709400 | -3.29698000 |
| O | -0.24191900 | 2.42567500  | 0.79762200  |
| H | 0.25169600  | 2.20970100  | -0.00918400 |
| H | -0.54324300 | 1.53990900  | 1.09003000  |

**PC\***

E = -3089.93305277 a.u.

0 1

|   |             |            |             |
|---|-------------|------------|-------------|
| N | 7.62669500  | 3.94149400 | 1.79936000  |
| N | 7.81241000  | 2.28695900 | -0.29166600 |
| N | 9.76309800  | 4.69000400 | -0.06846700 |
| N | 5.73738800  | 4.33395700 | -0.72340300 |
| C | 7.66305700  | 2.61477200 | 2.08873600  |
| C | 7.76178400  | 1.69760000 | 0.93103400  |
| C | 10.17744800 | 6.04517100 | 0.14671800  |
| C | 5.39223900  | 4.47548100 | -2.03296500 |
| C | 10.69038900 | 3.72256900 | -0.09563700 |
| C | 4.79241900  | 4.11131600 | 0.20839100  |
| C | 7.52407400  | 4.82597600 | 2.80110200  |
| C | 7.84973700  | 1.50889200 | -1.38048400 |
| C | 7.58471600  | 2.18079100 | 3.41302200  |
| C | 7.77389100  | 0.31329000 | 1.05506000  |
| C | 11.56893100 | 6.31325000 | 0.30305900  |
| C | 4.04120900  | 4.43035400 | -2.39160200 |
| C | 12.05512700 | 3.94665300 | 0.06279300  |
| C | 3.43776700  | 4.04656000 | -0.08320000 |
| C | 7.44580300  | 4.44657700 | 4.13549500  |
| C | 7.86601700  | 0.12215800 | -1.31099900 |
| C | 7.47111300  | 3.08711300 | 4.47466800  |

|   |             |             |             |
|---|-------------|-------------|-------------|
| C | 7.80188500  | -0.51776000 | -0.07180000 |
| C | 12.49473600 | 5.30728100  | 0.26509000  |
| C | 3.07287600  | 4.21729500  | -1.42564800 |
| H | 10.31587100 | 2.71873500  | -0.26717100 |
| H | 5.15001400  | 3.98323300  | 1.22254500  |
| H | 7.49255200  | 5.86830600  | 2.50097400  |
| H | 7.85471600  | 2.02691100  | -2.33153600 |
| H | 7.60267100  | 1.11884900  | 3.61979000  |
| H | 7.70706300  | -0.13382100 | 2.03818400  |
| H | 11.88606400 | 7.34112600  | 0.44710700  |
| H | 3.75886400  | 4.53708300  | -3.43216300 |
| H | 7.36158400  | 5.22009400  | 4.88816200  |
| H | 7.85572800  | -0.43528700 | -2.23602200 |
| H | 13.55386900 | 5.51749100  | 0.37807900  |
| H | 2.02678700  | 4.15341600  | -1.71006900 |
| P | 4.14491300  | 0.32403900  | -1.31126000 |
| F | 5.03599200  | 0.69112700  | 0.02998800  |
| F | 4.89631400  | 1.56449500  | -2.09007000 |
| F | 2.96669900  | 1.33843000  | -0.79357400 |
| F | 3.28345400  | -0.01259200 | -2.64261800 |
| F | 3.45741500  | -0.91107000 | -0.49733900 |
| F | 5.33479000  | -0.69700600 | -1.82184400 |
| C | 6.52697800  | 4.66044400  | -2.93809200 |
| C | 6.40950700  | 4.77480200  | -4.33041600 |
| C | 7.80413300  | 4.70436000  | -2.31307800 |
| C | 7.54177900  | 4.93940600  | -5.12308400 |
| H | 5.43640700  | 4.72613100  | -4.80978700 |
| C | 8.93652200  | 4.87630100  | -3.11914500 |
| C | 8.78509700  | 4.98887200  | -4.49590600 |
| H | 7.48056500  | 5.02404300  | -6.20243600 |
| H | 9.93410600  | 4.92362300  | -2.69571600 |
| F | 9.88741600  | 5.14859700  | -5.26094200 |
| C | 7.37341600  | 2.57310000  | 5.91607800  |
| C | 7.26082500  | 3.72202900  | 6.93477200  |
| H | 6.36314600  | 4.32791000  | 6.76725500  |
| H | 7.19479400  | 3.30898300  | 7.94672300  |
| H | 8.13577800  | 4.38143900  | 6.90375600  |
| C | 6.11927700  | 1.67588600  | 6.04597500  |
| H | 5.20843800  | 2.23784200  | 5.81183000  |
| H | 6.16125800  | 0.81089500  | 5.37617100  |
| H | 6.03456100  | 1.29957800  | 7.07178500  |
| C | 8.63953000  | 1.74725600  | 6.24581900  |
| H | 8.74928100  | 0.88244100  | 5.58327100  |
| H | 9.54326800  | 2.36021900  | 6.15447400  |



|    |             |             |             |
|----|-------------|-------------|-------------|
| H  | 8.58315000  | 1.37265200  | 7.27414300  |
| C  | 7.69873300  | -2.03542400 | 0.09608500  |
| C  | 6.36765200  | -2.35636700 | 0.82190600  |
| H  | 6.25556500  | -3.44344600 | 0.91210200  |
| H  | 6.34761200  | -1.93791500 | 1.83489000  |
| H  | 5.51513000  | -1.95388900 | 0.27255200  |
| C  | 8.89415400  | -2.53687800 | 0.93913000  |
| H  | 8.81833100  | -3.62068900 | 1.08350800  |
| H  | 9.84770600  | -2.32648500 | 0.43984900  |
| H  | 8.92281000  | -2.07307500 | 1.93193600  |
| C  | 7.70394100  | -2.76740100 | -1.25808500 |
| H  | 6.84898100  | -2.46414200 | -1.86704400 |
| H  | 8.62897700  | -2.58182600 | -1.81815300 |
| H  | 7.63463300  | -3.84720600 | -1.08726700 |
| C  | 2.42919000  | 3.72790000  | 0.98568600  |
| H  | 2.82550700  | 3.92419900  | 1.98772100  |
| H  | 1.51212300  | 4.31384300  | 0.85919600  |
| H  | 2.16962200  | 2.66648100  | 0.91847600  |
| C  | 13.04303300 | 2.81868400  | 0.01483600  |
| H  | 13.62023500 | 2.75695000  | 0.94810800  |
| H  | 12.55279800 | 1.85275200  | -0.14385700 |
| H  | 13.77112500 | 2.96483300  | -0.79520500 |
| C  | 9.12064300  | 6.97475600  | 0.17102500  |
| C  | 9.27648300  | 8.38351700  | 0.39954500  |
| C  | 7.77272400  | 6.42796500  | -0.06445600 |
| C  | 8.17648000  | 9.20946300  | 0.40019200  |
| H  | 10.26081600 | 8.80598100  | 0.57474700  |
| C  | 6.68925900  | 7.30421500  | -0.06437500 |
| C  | 6.89219700  | 8.66260000  | 0.16902500  |
| H  | 8.26516700  | 10.27741400 | 0.57257400  |
| H  | 5.68075300  | 6.95002000  | -0.25086400 |
| F  | 5.83623800  | 9.50390300  | 0.18246600  |
| Ir | 7.76058100  | 4.45754500  | -0.32691900 |

PC<sup>-</sup>

E = -3090.06834218 a.u.

-1 2

|   |             |            |             |
|---|-------------|------------|-------------|
| N | 7.69544800  | 4.08795800 | 1.82147800  |
| N | 7.86108400  | 2.41018900 | -0.26499700 |
| N | 9.84529300  | 4.83384900 | 0.03366000  |
| N | 5.84509400  | 4.30642800 | -0.69788900 |
| C | 7.73865400  | 2.71920300 | 2.10999000  |
| C | 7.76467200  | 1.83103600 | 0.99308200  |
| C | 10.25034900 | 6.12056200 | 0.25669800  |

|   |             |             |             |
|---|-------------|-------------|-------------|
| C | 5.51725100  | 4.34712300  | -2.02231700 |
| C | 10.73790800 | 3.82640400  | 0.04145200  |
| C | 4.94118400  | 3.89095900  | 0.21042500  |
| C | 7.64408700  | 4.96185800  | 2.84045600  |
| C | 7.75051100  | 1.62190200  | -1.35133200 |
| C | 7.71653000  | 2.31087100  | 3.47248800  |
| C | 7.64768000  | 0.41979200  | 1.08749800  |
| C | 11.61152500 | 6.37535300  | 0.48252200  |
| C | 4.22722100  | 3.98617100  | -2.41876100 |
| C | 12.09777900 | 4.01590500  | 0.26193300  |
| C | 3.65909600  | 3.47852200  | -0.12961400 |
| C | 7.61818700  | 4.59982700  | 4.17446800  |
| C | 7.60468700  | 0.25012600  | -1.29570000 |
| C | 7.65555500  | 3.21055800  | 4.51642200  |
| C | 7.55847000  | -0.38970400 | -0.02947500 |
| C | 12.52709300 | 5.33402100  | 0.48399200  |
| C | 3.30684900  | 3.54363500  | -1.48331800 |
| H | 10.31959600 | 2.84222300  | -0.13799500 |
| H | 5.29496500  | 3.85137700  | 1.23353800  |
| H | 7.61726700  | 6.00757100  | 2.54779900  |
| H | 7.76913200  | 2.14219000  | -2.30336400 |
| H | 7.75545100  | 1.24771600  | 3.68403700  |
| H | 7.56715400  | -0.02259100 | 2.07376100  |
| H | 11.94222700 | 7.39373500  | 0.65497300  |
| H | 3.97535200  | 3.96795900  | -3.47220100 |
| H | 7.57057100  | 5.37809700  | 4.92482800  |
| H | 7.45201000  | -0.29492700 | -2.21564000 |
| H | 13.58132600 | 5.53784400  | 0.65896900  |
| H | 2.34362300  | 3.16759900  | -1.80584100 |
| P | 3.57133000  | -0.08746600 | -1.92680600 |
| F | 4.46426200  | 0.65644700  | -0.76565300 |
| F | 3.98305900  | 1.08402200  | -2.99314600 |
| F | 2.25540100  | 0.79395900  | -1.46140000 |
| F | 2.67734900  | -0.82691300 | -3.07122100 |
| F | 3.16503600  | -1.25081200 | -0.84601600 |
| F | 4.88958300  | -0.96021500 | -2.37582300 |
| C | 6.62691700  | 4.70648800  | -2.90963400 |
| C | 6.49728700  | 4.87467900  | -4.29533700 |
| C | 7.88864500  | 4.84164000  | -2.26624000 |
| C | 7.60871800  | 5.18436300  | -5.07606500 |
| H | 5.52987800  | 4.76511200  | -4.77798100 |
| C | 8.99726800  | 5.15443000  | -3.06697600 |
| C | 8.83872400  | 5.31674300  | -4.43700700 |
| H | 7.54035000  | 5.32034700  | -6.15017400 |

|   |             |             |             |
|---|-------------|-------------|-------------|
| H | 9.98735800  | 5.27768400  | -2.63809500 |
| F | 9.92776300  | 5.61976600  | -5.19239300 |
| C | 7.63475800  | 2.70987100  | 5.97025400  |
| C | 7.55068300  | 3.86771900  | 6.98295600  |
| H | 6.64061100  | 4.46147600  | 6.84081300  |
| H | 7.53392800  | 3.46897400  | 8.00461000  |
| H | 8.41275500  | 4.53957400  | 6.90052500  |
| C | 6.40772700  | 1.79362500  | 6.18608200  |
| H | 5.47810000  | 2.33882700  | 5.98695600  |
| H | 6.43104200  | 0.92488000  | 5.52049300  |
| H | 6.37618000  | 1.42577800  | 7.22057300  |
| C | 8.92644400  | 1.91062100  | 6.26094200  |
| H | 9.02025300  | 1.04455900  | 5.59780900  |
| H | 9.81191800  | 2.54016300  | 6.11449100  |
| H | 8.93157200  | 1.54499000  | 7.29673000  |
| C | 7.36343000  | -1.90504900 | 0.13192100  |
| C | 5.98108500  | -2.15946500 | 0.77748800  |
| H | 5.81154300  | -3.23883900 | 0.89255600  |
| H | 5.91783600  | -1.70093000 | 1.77141900  |
| H | 5.18279100  | -1.74425600 | 0.16004600  |
| C | 8.47813400  | -2.48064300 | 1.03562300  |
| H | 8.34321400  | -3.56321600 | 1.15779900  |
| H | 9.46876000  | -2.30788500 | 0.59648400  |
| H | 8.47224600  | -2.03193700 | 2.03500900  |
| C | 7.41026000  | -2.64409100 | -1.21901300 |
| H | 6.58851700  | -2.32924600 | -1.86513500 |
| H | 8.36110200  | -2.47178300 | -1.73938900 |
| H | 7.31297100  | -3.72356200 | -1.04879900 |
| C | 2.74120900  | 2.86649700  | 0.89264300  |
| H | 3.12646000  | 2.99561700  | 1.90972700  |
| H | 1.73557800  | 3.30155800  | 0.84470700  |
| H | 2.65343100  | 1.79704000  | 0.67772000  |
| C | 13.05482400 | 2.85072600  | 0.26228300  |
| H | 13.57372300 | 2.76219100  | 1.22519800  |
| H | 12.53177300 | 1.90739000  | 0.07711500  |
| H | 13.82358600 | 2.96572800  | -0.51241700 |
| C | 9.17024500  | 7.10245900  | 0.22315900  |
| C | 9.35455300  | 8.47728900  | 0.44115800  |
| C | 7.87880100  | 6.55846500  | -0.04675300 |
| C | 8.27046700  | 9.34665200  | 0.39432600  |
| H | 10.34223300 | 8.88142200  | 0.65107600  |
| C | 6.79866600  | 7.45482100  | -0.09604100 |
| C | 7.01132400  | 8.80802200  | 0.12281400  |
| H | 8.37551000  | 10.41391800 | 0.55753400  |

|    |            |            |             |
|----|------------|------------|-------------|
| H  | 5.79253900 | 7.10384100 | -0.30372200 |
| F  | 5.95492700 | 9.65750500 | 0.07604600  |
| Ir | 7.84107800 | 4.56349100 | -0.26927300 |

### INT-3

E = -1165.49372286 a.u.

1 2

|   |             |             |             |
|---|-------------|-------------|-------------|
| C | 3.04040900  | -0.29783700 | 0.04589000  |
| C | 2.30183800  | 1.42532800  | -1.57673700 |
| C | 3.49495600  | 0.95035600  | -0.73021300 |
| H | 2.77365900  | -1.11185700 | -0.64400800 |
| H | 3.83289800  | -0.65708900 | 0.70832600  |
| H | 2.49425900  | 2.41066500  | -2.01124800 |
| H | 2.12497500  | 0.72168400  | -2.40201000 |
| B | 0.90025900  | 0.72932800  | 0.29541900  |
| O | 1.08069500  | 1.54526400  | -0.81407500 |
| O | 1.91134200  | 0.00136700  | 0.87884100  |
| C | 3.93387400  | 2.05360700  | 0.24930300  |
| H | 4.77219800  | 1.70961500  | 0.86474600  |
| H | 4.26030000  | 2.94551600  | -0.29674600 |
| H | 3.12357200  | 2.34404000  | 0.92470600  |
| C | 4.65204900  | 0.57574300  | -1.66919500 |
| H | 4.96229100  | 1.43909400  | -2.26843600 |
| H | 5.52258700  | 0.24402300  | -1.09304800 |
| H | 4.37343200  | -0.23199200 | -2.35674000 |
| C | -1.79996500 | -1.38881000 | 2.15944700  |
| C | 0.21391200  | -2.64535700 | 1.31518100  |
| C | -0.54983100 | -2.16793900 | 2.59057200  |
| H | -2.51713800 | -2.04885900 | 1.65689400  |
| H | -2.29400200 | -0.93402300 | 3.02152200  |
| H | 1.29062000  | -2.50063800 | 1.44798100  |
| H | 0.02999600  | -3.70834300 | 1.13327800  |
| B | -0.69938400 | -0.71478400 | 0.10206600  |
| O | -0.17041200 | -1.98725800 | 0.09635200  |
| O | -1.48647400 | -0.30535700 | 1.24223900  |
| C | 0.34910600  | -1.28615900 | 3.47887700  |
| H | -0.20397500 | -0.93189100 | 4.35662000  |
| H | 1.20559400  | -1.86579500 | 3.84008400  |
| H | 0.75300900  | -0.42484500 | 2.94478600  |
| C | -1.00860100 | -3.39609200 | 3.39953300  |
| H | -0.14550500 | -4.00186000 | 3.69654400  |
| H | -1.52815900 | -3.09281100 | 4.31550600  |
| H | -1.68387600 | -4.03508000 | 2.81813000  |
| C | -2.71544500 | -1.39958100 | -1.27049600 |

|   |             |             |             |
|---|-------------|-------------|-------------|
| C | -3.45254400 | -1.27219300 | -2.63624700 |
| H | -2.33581000 | -2.40478000 | -1.08191000 |
| H | -3.33968600 | -1.09553500 | -0.42774600 |
| H | -3.37726200 | -2.20460500 | -3.20332300 |
| H | -4.51528900 | -1.06679700 | -2.47738800 |
| C | -0.65759600 | -0.79647700 | -2.47393300 |
| H | 0.23069800  | -0.17103300 | -2.40595900 |
| H | -0.35558700 | -1.83901800 | -2.36707700 |
| C | -1.48334800 | -0.52366800 | -3.76579200 |
| H | -1.05374100 | 0.30968400  | -4.32980100 |
| H | -1.47334400 | -1.40246900 | -4.41712900 |
| C | -2.91059100 | 1.05456500  | -2.67018100 |
| H | -2.56533000 | 1.87373200  | -3.30782300 |
| H | -3.94982400 | 1.26302300  | -2.39925900 |
| C | -2.01649400 | 0.95044400  | -1.39737600 |
| H | -1.13505900 | 1.58956800  | -1.45785100 |
| H | -2.56360700 | 1.17484000  | -0.47905100 |
| N | -1.51022800 | -0.46950700 | -1.26729500 |
| N | -2.87481900 | -0.19193900 | -3.44086300 |
| O | 0.12822600  | 1.55231900  | 1.40066800  |
| H | -0.14712900 | 2.41853300  | 1.04548500  |
| H | -0.69256900 | 0.96409200  | 1.61551700  |

#### INT-4

E = -1510.90631550 a.u.

1 2

|   |            |             |             |
|---|------------|-------------|-------------|
| C | 2.35969800 | 0.39360100  | 1.19357400  |
| C | 2.35183500 | 0.78059700  | -1.24153500 |
| C | 3.18659700 | 0.97245800  | 0.03485100  |
| H | 2.24583300 | -0.68883900 | 1.05663100  |
| H | 2.86147400 | 0.56736500  | 2.15255900  |
| H | 2.84530400 | 1.24440500  | -2.10269000 |
| H | 2.22926700 | -0.29196000 | -1.44721300 |
| B | 0.36077700 | 1.22275300  | 0.08499900  |
| O | 1.05926000 | 1.38368100  | -1.12635900 |
| O | 1.06458200 | 0.99632000  | 1.28749800  |
| C | 3.47442100 | 2.46431300  | 0.27049500  |
| H | 4.06242700 | 2.60452500  | 1.18507000  |
| H | 4.04496600 | 2.88656500  | -0.56461100 |
| H | 2.54786900 | 3.03720700  | 0.37196700  |
| C | 4.49878800 | 0.18608600  | -0.09354100 |
| H | 5.09835500 | 0.56273400  | -0.93019300 |
| H | 5.10249500 | 0.28405700  | 0.81616400  |
| H | 4.31476100 | -0.88171100 | -0.26369700 |

|   |             |             |             |
|---|-------------|-------------|-------------|
| C | -1.85636700 | -1.86183500 | 1.72141500  |
| C | 0.16683700  | -2.81727400 | 0.63621600  |
| C | -0.54826700 | -2.62644300 | 1.98702700  |
| H | -2.55863700 | -2.51360900 | 1.18077700  |
| H | -2.33369900 | -1.59146500 | 2.67192700  |
| H | 1.19138000  | -3.17027900 | 0.79751000  |
| H | -0.35655800 | -3.59238700 | 0.05505700  |
| B | -0.73899400 | -0.63610500 | -0.08659400 |
| O | 0.24611700  | -1.63106000 | -0.15798300 |
| O | -1.67518900 | -0.64538600 | 0.98089400  |
| C | 0.33771400  | -1.85062700 | 2.97379900  |
| H | -0.16737200 | -1.75001400 | 3.94324500  |
| H | 1.28031300  | -2.38161200 | 3.14835400  |
| H | 0.56962400  | -0.85462100 | 2.59691500  |
| C | -0.88586300 | -4.00819600 | 2.57093900  |
| H | 0.02781200  | -4.58735000 | 2.74668700  |
| H | -1.40275200 | -3.90880000 | 3.53258100  |
| H | -1.52938000 | -4.58989400 | 1.90019500  |
| C | -2.45084900 | -1.82862800 | -1.59216600 |
| C | -3.11994700 | -1.93489500 | -2.99355700 |
| H | -1.82306300 | -2.69236200 | -1.36818000 |
| H | -3.18542900 | -1.71285000 | -0.79386700 |
| H | -2.70635000 | -2.77497900 | -3.55984700 |
| H | -4.19599700 | -2.10614600 | -2.88792400 |
| C | -0.63103800 | -0.65659200 | -2.73098300 |
| H | 0.06097300  | 0.17592700  | -2.62070200 |
| H | -0.07021000 | -1.58754600 | -2.63770600 |
| C | -1.46632100 | -0.57452800 | -4.04114700 |
| H | -1.30415800 | 0.38372500  | -4.54476200 |
| H | -1.16727700 | -1.36456300 | -4.73703200 |
| C | -3.34283600 | 0.43760200  | -2.95778800 |
| H | -3.29957500 | 1.34090000  | -3.57446700 |
| H | -4.39044800 | 0.27869700  | -2.68197700 |
| C | -2.45080200 | 0.60693100  | -1.69304800 |
| H | -1.79044600 | 1.46840200  | -1.76374700 |
| H | -3.02470100 | 0.69961200  | -0.76919500 |
| N | -1.56458800 | -0.60127000 | -1.54327900 |
| N | -2.90341800 | -0.70763100 | -3.76423100 |
| O | -0.69267000 | 2.21674400  | 0.23128900  |
| H | -0.48645900 | 2.95201600  | -0.36831100 |
| H | -1.17041900 | 2.44400600  | 1.77523000  |
| C | -3.07398200 | 1.98504100  | 2.46768800  |
| C | -3.76872500 | 1.87238400  | 3.85831800  |
| H | -3.53799800 | 2.73101000  | 1.81681800  |

|   |             |            |            |
|---|-------------|------------|------------|
| H | -2.99961100 | 1.04047500 | 1.92508900 |
| H | -4.68891200 | 2.46331200 | 3.87925300 |
| H | -4.03796700 | 0.83374900 | 4.07168700 |
| C | -1.64558900 | 3.81056100 | 3.32533300 |
| H | -0.59896200 | 4.08006500 | 3.48780900 |
| H | -2.07297400 | 4.50233600 | 2.59461100 |
| C | -2.47034900 | 3.73052300 | 4.64960400 |
| H | -1.87694800 | 4.09865700 | 5.49105700 |
| H | -3.36915200 | 4.35000700 | 4.58198100 |
| C | -1.68479500 | 1.48906100 | 4.98809600 |
| H | -1.02438900 | 1.87389200 | 5.77055300 |
| H | -1.99190200 | 0.48120200 | 5.28317300 |
| C | -0.95857100 | 1.45484600 | 3.61309700 |
| H | 0.09293300  | 1.74312400 | 3.64972600 |
| H | -1.01897800 | 0.49672400 | 3.10307000 |
| N | -1.65763500 | 2.43929600 | 2.71208400 |
| N | -2.87707800 | 2.34737800 | 4.92505600 |

#### HO-Bncop

E = -447.837867322 a.u.

0 1

|   |             |            |             |
|---|-------------|------------|-------------|
| C | -2.57896600 | 1.29669200 | -0.33367100 |
| C | -2.96525500 | 3.65363000 | 0.30608300  |
| C | -3.28223200 | 2.59517500 | -0.76563500 |
| H | -3.05403500 | 0.89756300 | 0.57452900  |
| H | -3.34312200 | 4.63515700 | -0.00336200 |
| H | -3.46236000 | 3.38808000 | 1.25098900  |
| H | -2.66417900 | 0.53447800 | -1.11715200 |
| B | -0.74687000 | 2.71330200 | 0.37577900  |
| O | -1.56768200 | 3.79442100 | 0.54453600  |
| O | -1.18791100 | 1.48898500 | -0.07723000 |
| C | -4.79808300 | 2.36087500 | -0.82283600 |
| H | -5.32287900 | 3.28037100 | -1.10788700 |
| H | -5.04589300 | 1.59380700 | -1.56619100 |
| H | -5.19390600 | 2.03283900 | 0.14611100  |
| C | -2.76480800 | 3.05357600 | -2.14069900 |
| H | -2.97100400 | 2.29360000 | -2.90357800 |
| H | -3.25745300 | 3.98393800 | -2.44642600 |
| H | -1.68619500 | 3.23507200 | -2.12946000 |
| O | 0.58335500  | 2.87904800 | 0.65063800  |
| H | 1.05876300  | 2.05284300 | 0.48370600  |

#### HA1<sup>+</sup>

E = -345.726631674 a.u.

1 1

|   |            |            |             |
|---|------------|------------|-------------|
| C | 2.16905700 | 1.24956900 | -3.63558700 |
| C | 1.41380900 | 1.39018600 | -4.99571400 |
| H | 2.65949100 | 0.27491800 | -3.57295500 |
| H | 1.46604400 | 1.32268500 | -2.80202000 |
| H | 1.54659700 | 0.53129900 | -5.65785600 |
| H | 0.34501600 | 1.58612700 | -4.88156200 |
| C | 4.17276100 | 2.19404600 | -4.56993600 |
| H | 4.93851000 | 2.95948600 | -4.42134600 |
| H | 4.66058400 | 1.21818200 | -4.50618600 |
| C | 3.49338500 | 2.37042400 | -5.96545900 |
| H | 3.85510500 | 3.24060800 | -6.51833000 |
| H | 3.57537400 | 1.48744400 | -6.60369400 |
| C | 1.80649200 | 3.85137700 | -4.87564300 |
| H | 2.20938200 | 4.68538400 | -5.45516800 |
| H | 0.72810100 | 3.98705800 | -4.76436000 |
| C | 2.54733200 | 3.62098500 | -3.51990200 |
| H | 3.31517300 | 4.38459700 | -3.37273400 |
| H | 1.84383100 | 3.69116800 | -2.68653800 |
| N | 3.18101600 | 2.30002100 | -3.49649700 |
| N | 2.01116100 | 2.59443600 | -5.70748200 |
| H | 1.53583600 | 2.71413800 | -6.60592400 |

**BN**

E = -717.242764373 a.u.

0 2

|   |            |             |             |
|---|------------|-------------|-------------|
| C | 2.92786500 | 1.50389200  | 0.01816300  |
| C | 4.59390600 | 0.04280800  | -1.05597600 |
| C | 4.14843400 | 0.61117600  | 0.30283100  |
| H | 2.09410200 | 0.86157700  | -0.32315600 |
| H | 2.59614900 | 2.00010100  | 0.94063000  |
| H | 5.50865200 | -0.55413400 | -0.93720500 |
| H | 3.80623000 | -0.63999000 | -1.42689600 |
| B | 4.12968000 | 2.27439100  | -1.98892500 |
| O | 4.85857400 | 1.05375200  | -2.01587300 |
| O | 3.19541100 | 2.51249100  | -0.94352000 |
| C | 5.28059000 | 1.43691000  | 0.93619100  |
| H | 4.95877200 | 1.86054500  | 1.89562500  |
| H | 6.16009400 | 0.80776400  | 1.12104600  |
| H | 5.58045100 | 2.26025500  | 0.28229900  |
| C | 3.74296400 | -0.53733600 | 1.23600500  |
| H | 4.59408200 | -1.20174100 | 1.43016000  |
| H | 3.39565300 | -0.15124500 | 2.20236200  |
| H | 2.93507800 | -1.14286300 | 0.80590000  |



|   |            |            |             |
|---|------------|------------|-------------|
| C | 2.24238000 | 1.26103400 | -3.52859700 |
| C | 1.46854700 | 1.37008400 | -4.87715300 |
| H | 2.79055800 | 0.32129500 | -3.43045500 |
| H | 1.59315700 | 1.37746600 | -2.65790800 |
| H | 1.58976300 | 0.45867900 | -5.47279800 |
| H | 0.39609300 | 1.51000600 | -4.70278400 |
| C | 4.20202400 | 2.22454700 | -4.60667100 |
| H | 4.94543100 | 3.01882100 | -4.49421700 |
| H | 4.71794600 | 1.27123100 | -4.48000300 |
| C | 3.39436800 | 2.31945500 | -5.93429400 |
| H | 3.74178400 | 3.16065800 | -6.54396200 |
| H | 3.51705000 | 1.40962500 | -6.53182700 |
| C | 1.77882800 | 3.74308500 | -4.89119400 |
| H | 2.12580600 | 4.58420500 | -5.50122600 |
| H | 0.70684400 | 3.88565400 | -4.71681200 |
| C | 2.55609500 | 3.67599600 | -3.54382700 |
| H | 3.32658400 | 4.44643500 | -3.44946200 |
| H | 1.91066600 | 3.74735500 | -2.66667600 |
| N | 3.26421800 | 2.36033200 | -3.44750800 |
| N | 1.95773600 | 2.50731200 | -5.67158300 |

## 11) References

- [1] C.-M. Zhu, R.-B. Liang, Y. Xiao, W. Zhou, Q.-X. Tong and J.-J. Zhong, *Green Chem.* 2023, **25**, 960.
- [2] R.-B. Liang, C.-M. Zhu, P.-Q. Song, L.-M. Zhao, Q.-X. Tong and J.-J. Zhong, *Org. Chem. Front.* 2022, **9**, 4536.
- [3] B. Du, C.-M. Chan and W.-Y. Yu, *Nat. Commun.*, 2021, **12**, 412.
- [4] X. Lu, X.-X. Wang, S.-J. He and Y. Fu, *Chem. Sci.* 2019, **10**, 809.
- [5] Gaussian 16, Revision A.03, M. J. Frisch, G. W. Trucks, H. B. Schlegel, G. E. Scuseria, M. A. Robb, J. R. Cheeseman, G. Scalmani, V. Barone, G. A. Petersson, H. Nakatsuji, X. Li, M. Caricato, A. V. Marenich, J. Bloino, B. G. Janesko, R. Gomperts, B. Mennucci, H. P. Hratchian, J. V. Ortiz, A. F. Izmaylov, J. L. Sonnenberg, D. Williams-Young, F. Ding, F. Lipparini, F. Egidi, J. Goings, B. Peng, A. Petrone, T. Henderson, D. Ranasinghe, V. G. Zakrzewski, J. Gao, N. Rega, G. Zheng, W. Liang, M. Hada, M. Ehara, K. Toyota, R. Fukuda, J. Hasegawa, M. Ishida, T. Nakajima,; Y. Honda, O. Kitao, H. Nakai, T. Vreven, K. Throssell, J. A. Montgomery Jr., J. E. Peralta, F. Ogliaro, M. J. Bearpark, J. J. Heyd, E. N. Brothers, K. N. Kudin, V. N. Staroverov, T. A. Keith, R. Kobayashi, J. Normand, K. Raghavachari, A. P. Rendell, J. C. Burant, S. S. Iyengar, J. Tomasi, M. Cossi, J. M. Millam, M. Klene, C. Adamo, R. Cammi, J. W. Ochterski, R. L. Martin, K. Morokuma, O. Farkas, J. B. Foresman, D. J. Fox, Gaussian16, Gaussian, Inc., Wallingford, CT, **2016**.
- [6] S. H. Vosko, L. Wilk and M. Nusair, *Can. J. Phys.*, 1980, **58**, 1200.
- [8] C. Lee, W. Yang and R. G. Parr, *Phys. Rev. B: Condens. Matter Mater. Phys.* 1988, **37**, 785.
- [9] Becke, A. D. *J. Chem. Phys.* 1993, **98**, 5648.
- [10] P. J. Stephens, F. J. Devlin, C. F. Chabalowski and M. J. Frisch, *J. Phys. Chem.* 1994, **98**, 11623.
- [11] G. Stefan, A. Jens, E. Stephan and K. Helge, *J. Chem. Phys.*, 2010, **132**, 154104.
- [12] A. V. Marenich, C. J. Cramer and D. G. Truhlar, *J. Phys. Chem. B.* 2009, **113**, 6378.
- [13] M. Mammen, E. I. Shakhnovich, J. M. Deutch and G. M. Whitesides, *J. Org. Chem.* 1998, **63**, 3821.

[14] G. Jindal and R. B. Sunoj, *J. Am. Chem. Soc.* 2014, **136**, 15998.

[15] G. Zeng and S. Li, *Inorg. Chem.* 2011, **50**, 10572.

[16] Gauss View, Version 6.0.16, R. Dennington, T. A. Keith, J. M. Millam, Semichem Inc., Shawnee Mission, KS, 2016.

## 2. Characterization data of the products

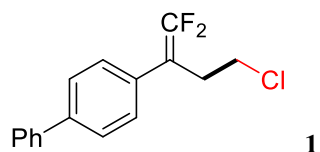

Purification by column chromatography on silica gel (hexane) afforded **1** as a white solid (50.6 mg, 91% yield).

**<sup>1</sup>H NMR** (400 MHz, Chloroform-*d*)  $\delta$  7.66 – 7.59 (m, 4H), 7.48 (t,  $J = 7.6$  Hz, 2H), 7.41 (t,  $J = 7.7$  Hz, 3H), 3.54 (t,  $J = 7.1$  Hz, 2H), 2.93 (tt,  $J = 6.9, 2.1$  Hz, 2H).

**<sup>13</sup>C NMR** (101 MHz, CDCl<sub>3</sub>)  $\delta$  154.55 (dd,  $J = 291.5, 289.5$  Hz), 140.61, 140.40, 131.23, 128.87, 128.68 (t,  $J = 3.1$  Hz), 127.56, 127.38, 127.05, 89.31 (dd,  $J = 21.3, 15.8$  Hz), 41.76, 31.21.

**<sup>19</sup>F NMR** (376 MHz, Chloroform-*d*)  $\delta$  -88.81 (d,  $J = 37.7$  Hz, 1F), -89.13 (d,  $J = 37.7$  Hz, 1F).

**HRMS** (ESI)  $m/z$  calcd. for C<sub>16</sub>H<sub>14</sub>ClF<sub>2</sub> [M+H]<sup>+</sup> : 279.0747, found: 279.0746.

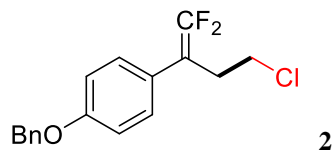

Purification by column chromatography on silica gel (hexane/ethyl acetate = 50/1, v/v) afforded **2** as a white solid (54.8 mg, 89% yield).

**<sup>1</sup>H NMR** (400 MHz, Chloroform-*d*)  $\delta$  7.45 (d,  $J = 13.7$  Hz, 4H), 7.40 – 7.35 (m, 1H), 7.27 (d,  $J = 8.7$  Hz, 2H), 7.02 (d,  $J = 8.8$  Hz, 2H), 5.10 (s, 2H), 3.50 (t,  $J = 7.1$  Hz, 2H), 2.86 (tt,  $J = 7.0, 2.0$  Hz, 2H).

**<sup>13</sup>C NMR** (101 MHz, CDCl<sub>3</sub>)  $\delta$  158.31, 154.35 (t,  $J = 291.2$  Hz), 136.81, 129.52 (t,  $J = 3.2$  Hz), 128.64, 128.07, 127.48, 124.66, 115.07, 89.03 (dd,  $J = 21.5, 16.4$  Hz), 70.08, 41.76, 31.41.

**<sup>19</sup>F NMR** (376 MHz, Chloroform-*d*)  $\delta$  = -90.11 (d,  $J = 40.6$ , 1F), -90.57 (d,  $J = 40.6$ , 1F).

**HRMS** (ESI)  $m/z$  calcd. for C<sub>17</sub>H<sub>16</sub>ClF<sub>2</sub>O [M+H]<sup>+</sup> : 309.0852, found: 309.0855.

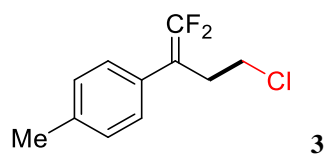

Purification by column chromatography on silica gel (hexane) afforded **3** as a colorless oil (35.0 mg, 81% yield).

**<sup>1</sup>H NMR** (400 MHz, Chloroform-*d*)  $\delta$  7.21 (s, 4H), 3.48 (t,  $J = 7.1$  Hz, 2H), 2.86 (ddq,  $J = 7.2, 4.5, 2.2$  Hz, 2H), 2.38 (s, 3H).

**<sup>13</sup>C NMR** (101 MHz, CDCl<sub>3</sub>)  $\delta$  154.37 (dd,  $J = 290.4, 288.4$  Hz), 137.60, 129.38, 128.17 (t,  $J = 3.0$  Hz), 89.35 (dd,  $J = 21.2, 16.4$  Hz), 41.74, 31.32, 21.13.

**<sup>19</sup>F NMR** (376 MHz, Chloroform-*d*)  $\delta$  -89.76 (d,  $J = 39.7$  Hz, 1F), -90.26 (d,  $J = 39.7$  Hz, 1F).

**HRMS** (ESI)  $m/z$  calcd. for C<sub>11</sub>H<sub>12</sub>ClF<sub>2</sub> [M+H]<sup>+</sup> : 217.0590, found: 217.0599.

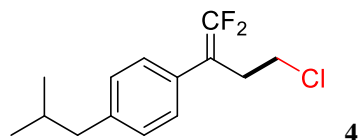

Purification by column chromatography on silica gel (hexane) afforded **4** as a colorless oil (31.0 mg, 60% yield).

**<sup>1</sup>H NMR** (400 MHz, Chloroform-*d*)  $\delta$  7.25 (s, 2H), 7.17 (d,  $J = 8.2$  Hz, 2H), 3.49 (t,  $J = 7.2$  Hz, 2H), 2.87 (tt,  $J = 7.2, 2.1$  Hz, 2H), 2.49 (d,  $J = 7.2$  Hz, 2H), 1.88 (dq,  $J = 13.6, 6.8$  Hz, 1H), 0.94 (s, 3H), 0.93 (s, 3H).

**<sup>13</sup>C NMR** (101 MHz, CDCl<sub>3</sub>)  $\delta$  154.39 (dd,  $J = 291.1, 288.5$  Hz), 141.36, 129.50, 129.38, 127.94 (t,  $J = 3.2$  Hz), 89.39 (dd,  $J = 21.2, 16.0$  Hz), 45.08, 41.75, 31.35, 30.12, 22.35.

**<sup>19</sup>F NMR** (376 MHz, Chloroform-*d*)  $\delta = -89.62$  (d,  $J = 39.5$ , 1F),  $-90.10$  (d,  $J = 39.5$ , 1F).

**HRMS** (ESI)  $m/z$  calcd. for C<sub>14</sub>H<sub>18</sub>ClF<sub>2</sub> [M+H]<sup>+</sup> : 259.1060, found: 259.1062.

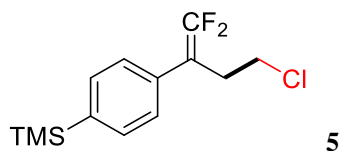

Purification by column chromatography on silica gel (hexane) afforded **5** as a colorless oil (46.0 mg, 84% yield).

**<sup>1</sup>H NMR** (400 MHz, Chloroform-*d*)  $\delta$  7.56 (d,  $J = 8.0$  Hz, 2H), 7.33 (d,  $J = 7.2$  Hz, 2H), 3.50 (t,  $J = 7.1$  Hz, 2H), 2.89 (tt,  $J = 7.1, 2.1$  Hz, 2H), 0.30 (s, 9H).

**<sup>13</sup>C NMR** (101 MHz, CDCl<sub>3</sub>)  $\delta$  154.51 (dd,  $J = 291.7, 289.1$  Hz), 140.20, 133.66, 132.66, 127.52 (t,  $J = 3.1$  Hz), 89.56 (dd,  $J = 21.2, 16.0$  Hz), 41.72, 31.21, -1.19.

**<sup>19</sup>F NMR** (376 MHz, Chloroform-*d*)  $\delta -89.02$  (d,  $J = 37.7$  Hz, 1F),  $-89.37$  (d,  $J = 37.9$  Hz, 1F).

**HRMS** (ESI)  $m/z$  calcd. for C<sub>13</sub>H<sub>18</sub>ClF<sub>2</sub>Si [M+H]<sup>+</sup> : 275.0829, found: 275.0823.

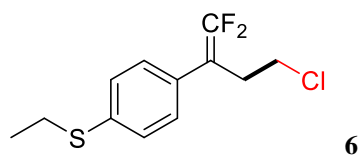

Purification by column chromatography on silica gel (hexane/ethyl acetate = 50/1, v/v) afforded **6** as a yellow oil (26.2 mg, 50% yield).

**<sup>1</sup>H NMR** (400 MHz, Chloroform-*d*)  $\delta$  7.31 (d,  $J = 8.5$  Hz, 2H), 7.24 (d,  $J = 8.4$  Hz, 2H), 3.48 (t,  $J = 7.1$  Hz, 2H), 2.97 (q,  $J = 7.4$  Hz, 2H), 2.85 (tt,  $J = 7.1, 2.1$  Hz, 2H), 1.34 (t,  $J = 7.4$  Hz, 3H).

**<sup>13</sup>C NMR** (101 MHz, CDCl<sub>3</sub>)  $\delta$  154.44 (dd,  $J = 291.7, 289.3$  Hz), 136.67, 129.49, 128.66 (t,  $J = 3.4$  Hz), 128.64, 89.11 (dd,  $J = 21.5, 15.7$  Hz), 41.67, 31.13, 27.29, 14.29.

**<sup>19</sup>F NMR** (376 MHz, Chloroform-*d*)  $\delta -88.96$  (d,  $J = 38.0$  Hz, 1F),  $-89.36$  (d,  $J = 38.0$  Hz, 1F).

**HRMS** (ESI)  $m/z$  calcd. for C<sub>12</sub>H<sub>14</sub>ClF<sub>2</sub>S [M+H]<sup>+</sup> : 263.0467, found: 263.0469.

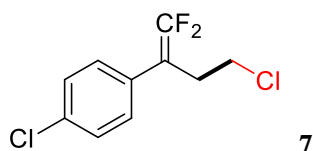

Purification by column chromatography on silica gel (hexane) afforded **7** as a colorless oil (28.3 mg, 60% yield).

**<sup>1</sup>H NMR** (400 MHz, Chloroform-*d*)  $\delta$  7.36 (d,  $J$  = 8.5 Hz, 2H), 7.26 (d,  $J$  = 8.0 Hz, 2H), 3.46 (t,  $J$  = 6.9 Hz, 2H), 2.85 (ddt,  $J$  = 6.9, 4.7, 2.2 Hz, 2H).

**<sup>13</sup>C NMR** (101 MHz, CDCl<sub>3</sub>)  $\delta$  154.47 (dd,  $J$  = 291.5, 289.6 Hz), 133.68, 130.78, 129.67 (t,  $J$  = 3.2 Hz), 128.92, 88.81 (dd,  $J$  = 21.9, 15.9 Hz), 41.51, 31.10.

**<sup>19</sup>F NMR** (376 MHz, Chloroform-*d*)  $\delta$  -88.55 (d,  $J$  = 37.0 Hz, 1F), -88.92 (d,  $J$  = 36.9 Hz, 1F).

**HRMS** (ESI)  $m/z$  calcd. for C<sub>10</sub>H<sub>9</sub>Cl<sub>2</sub>F<sub>2</sub> [M+H]<sup>+</sup> : 237.0044, found: 237.0044.

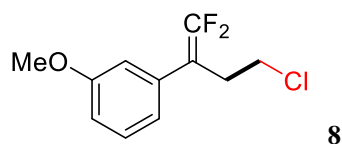

Purification by column chromatography on silica gel (hexane/ethyl acetate = 50/1, v/v) afforded **8** as a colorless oil (30.2 mg, 65% yield).

**<sup>1</sup>H NMR** (400 MHz, Chloroform-*d*)  $\delta$  7.30 (t,  $J$  = 8.3 Hz, 1H), 6.91 (d,  $J$  = 7.7 Hz, 1H), 6.86 (d,  $J$  = 5.4 Hz, 2H), 3.83 (s, 3H), 3.48 (t,  $J$  = 7.0 Hz, 2H), 2.86 (ddt,  $J$  = 7.0, 5.1, 2.2 Hz, 2H).

**<sup>13</sup>C NMR** (101 MHz, CDCl<sub>3</sub>)  $\delta$  159.73, 154.45 (dd,  $J$  = 291.2, 288.7 Hz), 133.67, 129.67, 120.67 (t,  $J$  = 3.1 Hz), 114.39 (t,  $J$  = 3.4 Hz), 113.02, 89.51 (dd,  $J$  = 21.1, 15.9 Hz), 55.25, 41.69, 31.33.

**<sup>19</sup>F NMR** (376 MHz, Chloroform-*d*)  $\delta$  -88.73 (d,  $J$  = 38.0 Hz, 1F), -89.65 (d,  $J$  = 38.1 Hz, 1F).

**HRMS** (ESI)  $m/z$  calcd. for C<sub>11</sub>H<sub>12</sub>ClF<sub>2</sub>O [M+H]<sup>+</sup> : 233.0539, found: 233.0530.

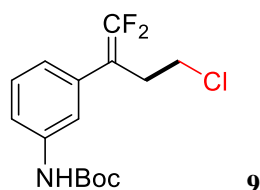

Purification by column chromatography on silica gel (hexane/ethyl acetate = 20/1, v/v) afforded **9** as a brown oil (38.0 mg, 60% yield).

**<sup>1</sup>H NMR** (400 MHz, Chloroform-*d*)  $\delta$  7.35 (s, 1H), 7.26 (d,  $J$  = 5.2 Hz, 2H), 6.99 – 6.91 (m, 1H), 6.67 (s, 1H), 3.44 (t,  $J$  = 7.0 Hz, 2H), 2.81 (t,  $J$  = 6.9 Hz, 2H), 1.50 (s, 9H).

**<sup>13</sup>C NMR** (101 MHz, CDCl<sub>3</sub>)  $\delta$  154.43 (dd,  $J$  = 292.3, 289.9 Hz), 152.71, 138.80, 133.12, 129.23, 122.98 (t,  $J$  = 2.9 Hz), 118.37, 117.92, 89.46 (dd,  $J$  = 21.6, 16.0 Hz), 80.72, 41.68, 31.25, 28.30.

**<sup>19</sup>F NMR** (376 MHz, Chloroform-*d*)  $\delta$  -88.89 (d,  $J$  = 38.0 Hz, 1F), -89.79 (d,  $J$  = 38.1 Hz, 1F).

**HRMS** (ESI)  $m/z$  calcd. for C<sub>15</sub>H<sub>19</sub>ClF<sub>2</sub>NO<sub>2</sub> [M+H]<sup>+</sup> : 318.1067, found: 318.1066.

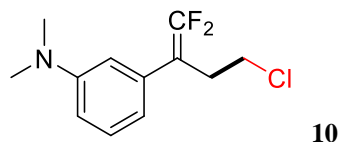

Purification by column chromatography on silica gel (hexane/ethyl acetate = 20/1, v/v) afforded **10** as a brown oil (23.5 mg, 48% yield).

**<sup>1</sup>H NMR** (400 MHz, Chloroform-*d*)  $\delta$  7.27 – 7.21 (m, 1H), 6.71 – 6.62 (m, 3H), 3.49 (t, *J* = 7.1 Hz, 2H), 2.97 (s, 6H), 2.84 (tt, *J* = 7.1, 2.2 Hz, 2H).

**<sup>13</sup>C NMR** (101 MHz, CDCl<sub>3</sub>)  $\delta$  154.35 (dd, *J* = 290.3, 288.4 Hz), 150.68, 133.07, 129.28, 116.52, 112.58, 112.02, 90.15 (dd, *J* = 20.9, 16.2 Hz), 41.86, 40.52, 31.63.

**<sup>19</sup>F NMR** (376 MHz, Chloroform-*d*)  $\delta$  -89.33 (d, *J* = 40.0 Hz, 1F), -90.73 (d, *J* = 40.0 Hz, 1F).

**HRMS** (ESI) *m/z* calcd. for C<sub>12</sub>H<sub>15</sub>ClF<sub>2</sub>N [M+H]<sup>+</sup> : 246.0856, found: 246.0865.

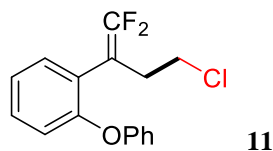

Purification by column chromatography on silica gel (hexane/ethyl acetate = 50/1, v/v) afforded **11** as a colorless oil (42.9 mg, 73% yield).

**<sup>1</sup>H NMR** (400 MHz, Chloroform-*d*)  $\delta$  7.38 – 7.28 (m, 4H), 7.18 – 7.09 (m, 2H), 6.99 – 6.90 (m, 3H), 3.48 (t, *J* = 7.0 Hz, 2H), 2.84 (tt, *J* = 7.0, 2.0 Hz, 2H).

**<sup>13</sup>C NMR** (101 MHz, CDCl<sub>3</sub>)  $\delta$  154.99, 154.97, 154.19 (t, *J* = 290.2 Hz), 131.95, 129.81, 129.74, 123.68, 123.33, 119.28, 118.29, 86.50 (dd, *J* = 23.6, 18.5 Hz), 41.88, 31.24

**<sup>19</sup>F NMR** (376 MHz, Chloroform-*d*)  $\delta$  -87.49 (d, *J* = 37.4 Hz, 1F), -91.04 (d, *J* = 37.4 Hz, 1F).

**HRMS** (ESI) *m/z* calcd. for C<sub>16</sub>H<sub>14</sub>ClF<sub>2</sub>O [M+H]<sup>+</sup> : 295.0696, found: 295.0687.

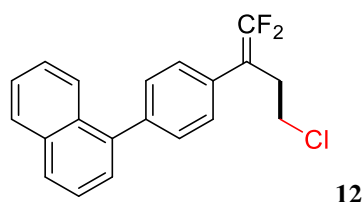

Purification by column chromatography on silica gel (hexane) afforded **12** as a white solid (49.9 mg, 76% yield).

**<sup>1</sup>H NMR** (400 MHz, Chloroform-*d*)  $\delta$  7.99 – 7.94 (m, 2H), 7.92 (d, *J* = 8.2 Hz, 1H), 7.60 – 7.52 (m, 4H), 7.52 – 7.45 (m, 4H), 3.61 (t, *J* = 7.1 Hz, 2H), 2.98 (ddt, *J* = 7.1, 5.1, 2.1 Hz, 2H).

**<sup>13</sup>C NMR** (101 MHz, CDCl<sub>3</sub>)  $\delta$  154.65 (dd, *J* = 291.8, 289.1 Hz), 140.27, 139.52, 133.87, 131.52, 131.27, 130.40, 128.39, 128.18 (t, *J* = 3.2 Hz), 127.91, 126.99, 126.19, 125.90, 125.88, 125.42, 89.44 (dd, *J* = 21.2, 15.8 Hz), 41.84, 31.31.

**<sup>19</sup>F NMR** (376 MHz, Chloroform-*d*)  $\delta$  -88.74 (d, *J* = 37.7 Hz, 1F), -89.02 (d, *J* = 37.7 Hz, 1F).

**HRMS** (ESI) *m/z* calcd. for C<sub>20</sub>H<sub>16</sub>ClF<sub>2</sub> [M+H]<sup>+</sup> : 329.0903, found: 329.0901.

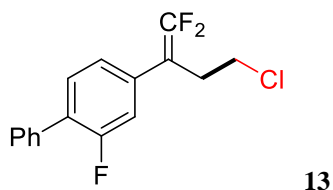

Purification by column chromatography on silica gel (hexane/ethyl acetate = 50/1, v/v) afforded **13** as a brown solid (41.4 mg, 70% yield).

**<sup>1</sup>H NMR** (400 MHz, Chloroform-*d*)  $\delta$  7.60 – 7.55 (m, 2H), 7.50 – 7.44 (m, 3H), 7.41 (t,  $J$  = 7.3 Hz, 1H), 7.18 (dd,  $J$  = 15.1, 10.2 Hz, 2H), 3.55 (t,  $J$  = 7.0 Hz, 2H), 2.91 (tt,  $J$  = 7.0, 2.2 Hz, 2H).

**<sup>13</sup>C NMR** (101 MHz, CDCl<sub>3</sub>)  $\delta$  159.67 (d,  $J$  = 248.7 Hz), 154.74 (dd,  $J$  = 293.1, 290.2 Hz), 135.15, 133.29, 130.91 (d,  $J$  = 4.2 Hz), 128.93 (d,  $J$  = 2.9 Hz), 128.54, 128.37, 127.92, 124.18 (d,  $J$  = 3.3 Hz), 116.02 (d,  $J$  = 24.3 Hz), 88.79 (dd,  $J$  = 22.5, 14.8 Hz), 41.60, 30.95.

**<sup>19</sup>F NMR** (376 MHz, Chloroform-*d*)  $\delta$  -87.44 (d,  $J$  = 34.9 Hz, 1F), -87.88 (d,  $J$  = 34.9 Hz, 1F), -117.28, 1F.

**HRMS** (ESI)  $m/z$  calcd. for C<sub>16</sub>H<sub>13</sub>ClF<sub>3</sub> [M+H]<sup>+</sup> : 297.0652, found: 297.0642.

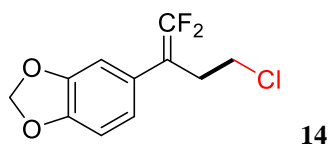

Purification by column chromatography on silica gel (hexane/ethyl acetate = 50/1, v/v) afforded **14** as a colorless oil (41.8 mg, 85% yield).

**<sup>1</sup>H NMR** (400 MHz, Chloroform-*d*)  $\delta$  6.80 (dt,  $J$  = 14.7, 8.3 Hz, 3H), 5.98 (s, 2H), 3.47 (t,  $J$  = 7.0 Hz, 2H), 2.80 (tt,  $J$  = 7.3, 2.3 Hz, 2H).

**<sup>13</sup>C NMR** (101 MHz, CDCl<sub>3</sub>)  $\delta$  154.39 (t,  $J$  = 289.3 Hz), 147.90, 147.16, 125.82, 121.94 (t,  $J$  = 3.1 Hz), 108.89 (t,  $J$  = 3.3 Hz), 108.48, 101.25, 89.28 (dd,  $J$  = 21.9, 16.3 Hz), 41.64, 31.54.

**<sup>19</sup>F NMR** (376 MHz, Chloroform-*d*)  $\delta$  -89.59 (d,  $J$  = 39.9 Hz, 1F), -90.47 (d,  $J$  = 40.0 Hz, 1F).

**HRMS** (ESI)  $m/z$  calcd. for C<sub>11</sub>H<sub>10</sub>ClF<sub>2</sub>O<sub>2</sub> [M+H]<sup>+</sup> : 247.0332, found: 247.0328.

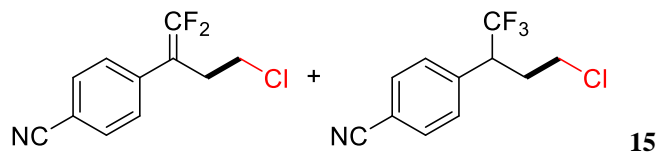

Purification by column chromatography on silica gel (hexane/ethyl acetate = 10/1, v/v) afforded **15** as a yellow oil (25.9 mg, 57% yield).

**<sup>1</sup>H NMR** (400 MHz, Chloroform-*d*)  $\delta$  = 7.75 – 7.61 (m, 4H), 7.45 (dt,  $J$  = 13.9, 7.0 Hz, 4H), 3.80 – 3.69 (m, 1H), 3.67 – 3.56 (m, 1H), 3.54 – 3.41 (m, 2H), 3.13 (tt,  $J$  = 16.4, 8.2 Hz, 1H), 2.93 – 2.86 (m, 2H), 2.56 – 2.40 (m, 1H), 2.39 – 2.24 (m, 1H).



$^{13}\text{C NMR}$  (101 MHz,  $\text{CDCl}_3$ )  $\delta$  = 154.79 (dd,  $J$  = 293.7, 291.8 Hz), 138.47, 137.42 (t,  $J$  = 3.3 Hz), 132.69, 132.40, 129.92, 128.98 (t,  $J$  = 3.4 Hz), 127.55 (t,  $J$  = 281.0 Hz), 118.39, 118.12, 112.83, 111.51, 89.08 (dd,  $J$  = 21.6, 15.9 Hz), 47.01 (q,  $J$  = 27.6 Hz), 41.41, 40.99, 31.41, 30.63.

$^{19}\text{F NMR}$  (376 MHz, Chloroform-*d*)  $\delta$  = -69.02 (s), -86.15 (d,  $J$  = 31.2 Hz, 1F), -86.32 (d,  $J$  = 31.3 Hz, 1F).

**HRMS** (ESI)  $m/z$  calcd. for  $\text{C}_{11}\text{H}_9\text{ClF}_2\text{N}$  and  $\text{C}_{11}\text{H}_{10}\text{ClF}_3\text{N}$   $[\text{M}+\text{H}]^+$  : 228.0386 and 248.0448, found: 228.0388 and 248.0445.

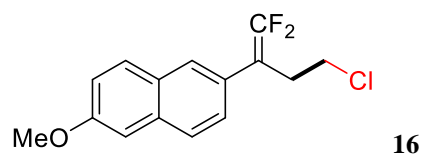

Purification by column chromatography on silica gel (hexane/ethyl acetate = 50/1, v/v) afforded **16** as a white solid (42.9 mg, 76% yield).

$^1\text{H NMR}$  (400 MHz, Chloroform-*d*)  $\delta$  7.78 – 7.71 (m, 3H), 7.41 (dt,  $J$  = 8.6, 1.4 Hz, 1H), 7.20 (dd,  $J$  = 8.9, 2.5 Hz, 1H), 7.15 (d,  $J$  = 2.4 Hz, 1H), 3.95 (s, 3H), 3.52 (t,  $J$  = 7.1 Hz, 2H), 2.96 (tt,  $J$  = 7.1, 2.1 Hz, 2H).

$^{13}\text{C NMR}$  (101 MHz,  $\text{CDCl}_3$ )  $\delta$  158.12, 154.60 (dd,  $J$  = 290.9, 288.9 Hz), 133.87, 129.44, 128.75, 127.31 (t,  $J$  = 3.3 Hz), 127.20, 126.46 (t,  $J$  = 3.0 Hz), 119.35, 105.61, 99.99, 89.62 (dd,  $J$  = 21.0, 16.1 Hz), 55.34, 41.81, 31.40.

$^{19}\text{F NMR}$  (376 MHz, Chloroform-*d*)  $\delta$  = -89.48 (d,  $J$  = 38.9, 1F), -89.75 (d,  $J$  = 39.0, 1F).

**HRMS** (ESI)  $m/z$  calcd. for  $\text{C}_{15}\text{H}_{14}\text{ClF}_2\text{O}$   $[\text{M}+\text{H}]^+$  : 283.0696, found: 283.0698.

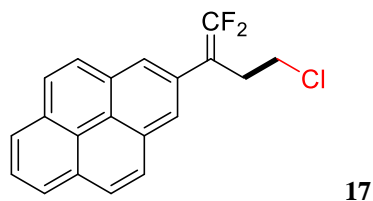

Purification by column chromatography on silica gel (hexane/ethyl acetate = 50/1, v/v) afforded **17** as a white solid (41.1 mg, 63% yield).

$^1\text{H NMR}$  (400 MHz, Chloroform-*d*)  $\delta$  8.25 – 8.16 (m, 5H), 8.07 (dq,  $J$  = 15.3, 8.3, 7.6 Hz, 3H), 7.92 (d,  $J$  = 7.9 Hz, 1H), 3.48 (t,  $J$  = 6.6 Hz, 2H), 3.10 (d,  $J$  = 7.4 Hz, 2H).

$^{13}\text{C NMR}$  (101 MHz,  $\text{CDCl}_3$ )  $\delta$  154.38 (dd,  $J$  = 292.0, 288.4 Hz), 131.34, 131.25, 130.85, 129.53, 128.27, 127.98, 127.39 (d,  $J$  = 1.4 Hz), 127.21, 126.95 (d,  $J$  = 3.7 Hz), 126.22, 125.55, 125.42, 124.99, 124.79, 124.66, 124.03, 87.82 (t,  $J$  = 21.5 Hz), 41.77, 33.26.

$^{19}\text{F NMR}$  (376 MHz, Chloroform-*d*)  $\delta$  -85.89 (d,  $J$  = 37.2 Hz, 1F), -90.62 (d,  $J$  = 37.2 Hz, 1F).

**HRMS** (ESI)  $m/z$  calcd. for  $\text{C}_{20}\text{H}_{14}\text{ClF}_2$   $[\text{M}+\text{H}]^+$  : 327.0747, found: 327.0740.

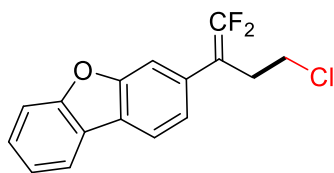

**18**

Purification by column chromatography on silica gel (hexane/ethyl acetate = 50/1, v/v) afforded **18** as a white solid (50.2 mg, 86% yield).

**<sup>1</sup>H NMR** (400 MHz, Chloroform-*d*)  $\delta$  8.02 – 7.92 (m, 2H), 7.62 (d, *J* = 8.2 Hz, 1H), 7.54 – 7.48 (m, 1H), 7.43 – 7.34 (m, 3H), 3.52 (t, *J* = 7.0 Hz, 2H), 3.12 (tt, *J* = 6.9, 2.1 Hz, 2H).

**<sup>13</sup>C NMR** (101 MHz, CDCl<sub>3</sub>)  $\delta$  156.02, 154.60 (t, *J* = 293.2 Hz), 153.75, 128.15, 127.50, 124.78, 123.98, 123.02, 122.96, 120.77, 120.61, 116.69, 111.82, 85.73 (dd, *J* = 24.1, 17.4 Hz), 41.93, 30.96.

**<sup>19</sup>F NMR** (376 MHz, Chloroform-*d*)  $\delta$  -86.24 (d, *J* = 34.0 Hz, 1F), -89.38 (d, *J* = 34.0 Hz, 1F).

**HRMS** (ESI) *m/z* calcd. for C<sub>16</sub>H<sub>12</sub>ClF<sub>2</sub>O [M+H]<sup>+</sup> : 293.0539, found: 293.0537.

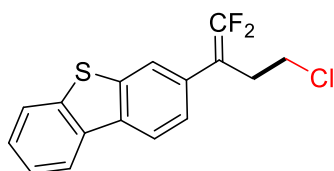

**19**

Purification by column chromatography on silica gel (hexane/ethyl acetate = 50/1, v/v) afforded **19** as a white solid (38.2 mg, 62% yield).

**<sup>1</sup>H NMR** (400 MHz, Chloroform-*d*)  $\delta$  8.15 (d, *J* = 7.8 Hz, 2H), 7.91 – 7.82 (m, 1H), 7.52 – 7.44 (m, 3H), 7.38 (d, *J* = 7.2 Hz, 1H), 3.47 (t, *J* = 6.7 Hz, 2H), 3.00 (d, *J* = 7.1 Hz, 2H).

**<sup>13</sup>C NMR** (101 MHz, CDCl<sub>3</sub>)  $\delta$  154.34 (t, *J* = 293.1 Hz), 139.91, 139.87, 139.06, 136.21, 135.64, 127.84, 127.11, 124.86, 124.61, 122.79, 121.81, 121.48, 88.51 (dd, *J* = 22.9, 18.8 Hz), 41.70, 31.04.

**<sup>19</sup>F NMR** (376 MHz, Chloroform-*d*)  $\delta$  -84.74 (d, *J* = 33.4 Hz, 1F), -89.69 (d, *J* = 33.4 Hz, 1F).

**HRMS** (ESI) *m/z* calcd. for C<sub>16</sub>H<sub>12</sub>ClF<sub>2</sub>S [M+H]<sup>+</sup> : 309.0311, found: 309.0305.

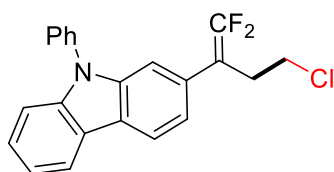

**20**

Purification by column chromatography on silica gel (hexane/ethyl acetate = 20/1, v/v) afforded **20** as a brown solid (51.4 mg, 70% yield).

**<sup>1</sup>H NMR** (400 MHz, Chloroform-*d*)  $\delta$  8.17 (dd, *J* = 7.9, 2.9 Hz, 2H), 7.69 – 7.63 (m, 2H), 7.63 – 7.58 (m, 2H), 7.56 – 7.50 (m, 1H), 7.48 – 7.44 (m, 2H), 7.39 (s, 1H), 7.34 (ddd, *J* = 8.0, 5.3, 2.8 Hz, 1H), 7.26 (d, *J* = 8.1 Hz, 1H), 3.52 (t, *J* = 7.0 Hz, 2H), 2.94 (tt, *J* = 7.0, 2.0 Hz, 2H).

**<sup>13</sup>C NMR** (101 MHz, CDCl<sub>3</sub>) δ 154.46 (t, *J* = 291.0 Hz), 141.45, 140.99, 137.43, 130.05, 127.71, 127.13, 126.31, 123.01, 122.96, 120.51, 120.40, 120.24, 109.91, 109.86, 109.83, 109.79, 90.35 (dd, *J* = 21.3, 16.3 Hz), 41.88, 31.85.

**<sup>19</sup>F NMR** (376 MHz, Chloroform-*d*) δ -89.44 (d, *J* = 39.1 Hz, 1F), -90.13 (d, *J* = 39.1 Hz, 1F).

**HRMS** (ESI) *m/z* calcd. for C<sub>22</sub>H<sub>17</sub>ClF<sub>2</sub>N [M+H]<sup>+</sup> : 368.1012, found: 368.1009.

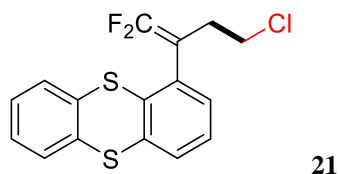

Purification by column chromatography on silica gel (hexane/ethyl acetate = 50/1, v/v) afforded **21** as a white solid (45.6 mg, 67% yield).

**<sup>1</sup>H NMR** (400 MHz, Chloroform-*d*) δ 7.49 (dt, *J* = 7.7, 2.1 Hz, 3H), 7.26 – 7.21 (m, 3H), 7.19 (dd, *J* = 7.6, 1.5 Hz, 1H), 3.42 (t, *J* = 6.9 Hz, 2H), 2.92 – 2.81 (m, 2H).

**<sup>13</sup>C NMR** (101 MHz, CDCl<sub>3</sub>) δ 154.46 (dd, *J* = 292.5, 287.9 Hz), 136.72, 136.29, 136.08, 135.07, 132.33, 129.59, 128.93, 128.88, 128.67, 128.02, 127.87, 127.47, 88.19 (dd, *J* = 24.5, 19.4 Hz), 41.55, 31.82.

**<sup>19</sup>F NMR** (376 MHz, Chloroform-*d*) δ -85.72 (d, *J* = 35.5 Hz, 1F), -90.33 (d, *J* = 35.8 Hz, 1F).

**HRMS** (ESI) *m/z* calcd. for C<sub>16</sub>H<sub>12</sub>ClF<sub>2</sub>S<sub>2</sub> [M+H]<sup>+</sup> : 341.0032, found: 341.0030.

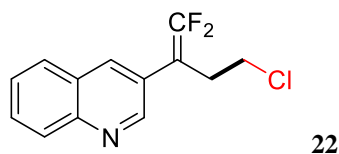

Purification by column chromatography on silica gel (hexane/ethyl acetate = 10/1, v/v) afforded **22** as a brown oil (36.4 mg, 72% yield).

**<sup>1</sup>H NMR** (400 MHz, Chloroform-*d*) δ 8.88 (s, 1H), 8.11 (d, *J* = 9.4 Hz, 2H), 7.82 (d, *J* = 8.3 Hz, 1H), 7.77 – 7.70 (m, 1H), 7.58 (t, *J* = 7.5 Hz, 1H), 3.52 (t, *J* = 6.8 Hz, 2H), 2.98 (tt, *J* = 6.9, 2.1 Hz, 2H).

**<sup>13</sup>C NMR** (101 MHz, CDCl<sub>3</sub>) δ 155.06 (t, *J* = 293.4 Hz), 149.97 (t, *J* = 3.5 Hz), 147.21, 135.31, 130.00, 129.20, 127.78, 127.58, 127.27, 125.68 (t, *J* = 3.5 Hz), 87.23 (dd, *J* = 21.4, 14.7 Hz), 41.50, 30.93.

**<sup>19</sup>F NMR** (376 MHz, Chloroform-*d*) δ -87.12 (d, *J* = 34.1 Hz, 1F), -87.54 (d, *J* = 34.1 Hz, 1F).

**HRMS** (ESI) *m/z* calcd. for C<sub>13</sub>H<sub>11</sub>ClF<sub>2</sub>N [M+H]<sup>+</sup> : 254.0543, found: 254.0533.

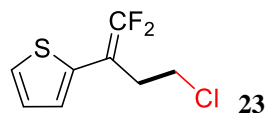

Purification by column chromatography on silica gel (hexane/ethyl acetate = 50/1, v/v) afforded **23** as a colorless oil (31.6 mg, 76% yield).

**<sup>1</sup>H NMR** (400 MHz, Chloroform-*d*) δ 7.35 (d, *J* = 4.3 Hz, 1H), 7.25 – 7.20 (m, 1H), 7.20 – 7.11 (m, 1H), 3.57 (t, *J* = 7.1 Hz, 2H), 2.87 (t, *J* = 6.1 Hz, 2H).

$^{13}\text{C}$  NMR (101 MHz,  $\text{CDCl}_3$ )  $\delta$  154.74 (dd,  $J = 294.2, 288.3$  Hz), 132.46, 126.75 (d,  $J = 3.8$  Hz), 126.07, 122.19 (t,  $J = 5.3$  Hz), 85.83 (dd,  $J = 23.4, 15.0$  Hz), 41.87, 30.93.

$^{19}\text{F}$  NMR (376 MHz, Chloroform-*d*)  $\delta$  -85.46 (d,  $J = 35.8$  Hz, 1F), -89.67 (d,  $J = 35.7$  Hz, 1F).

HRMS (ESI)  $m/z$  calcd. for  $\text{C}_8\text{H}_8\text{ClF}_2\text{S}$   $[\text{M}+\text{H}]^+$  : 208.9998, found: 208.9998.

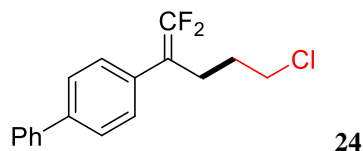

Purification by column chromatography on silica gel (hexane) afforded **24** as a white solid (35.6 mg, 61% yield).

$^1\text{H}$  NMR (400 MHz, Chloroform-*d*)  $\delta$  7.67 (d,  $J = 7.2$  Hz, 4H), 7.51 (t,  $J = 7.6$  Hz, 2H), 7.45 (dd,  $J = 12.0, 7.8$  Hz, 3H), 3.58 (t,  $J = 6.4$  Hz, 2H), 2.73 – 2.64 (m, 2H), 1.94 (p,  $J = 6.6$  Hz, 2H).

$^{13}\text{C}$  NMR (101 MHz,  $\text{CDCl}_3$ )  $\delta$  153.92 (t,  $J = 289.8$  Hz), 140.48, 140.32, 132.03, 128.89, 128.56 (t,  $J = 3.3$  Hz), 127.53, 127.30, 127.05, 91.01 (t,  $J = 17.5$  Hz), 44.11, 30.66, 24.90.

$^{19}\text{F}$  NMR (376 MHz,  $\text{CDCl}_3$ )  $\delta$  -89.93, 2F.

HRMS (ESI)  $m/z$  calcd. for  $\text{C}_{17}\text{H}_{16}\text{ClF}_2$   $[\text{M}+\text{H}]^+$  : 293.0903, found: 293.0904.

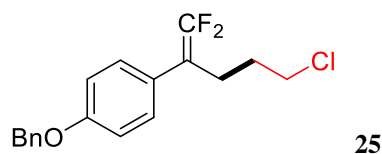

Purification by column chromatography on silica gel (hexane/ethyl acetate = 50/1, v/v) afforded **25** as a white solid (42.5 mg, 66% yield).

$^1\text{H}$  NMR (400 MHz, Chloroform-*d*)  $\delta$  7.44 (dt,  $J = 14.6, 7.4$  Hz, 4H), 7.36 (dd,  $J = 8.3, 5.8$  Hz, 1H), 7.26 (d,  $J = 7.8$  Hz, 2H), 7.02 – 6.97 (m, 2H), 5.09 (s, 2H), 3.52 (t,  $J = 6.5$  Hz, 2H), 2.57 (ddd,  $J = 10.1, 4.6, 2.2$  Hz, 2H), 1.86 (p,  $J = 6.6$  Hz, 2H).

$^{13}\text{C}$  NMR (101 MHz,  $\text{CDCl}_3$ )  $\delta$  158.10, 153.65 (dd,  $J = 289.9, 287.6$  Hz), 136.87, 129.33 (t,  $J = 3.3$  Hz), 128.63, 128.04, 127.48, 125.47, 114.97, 90.64 (dd,  $J = 20.9, 14.8$  Hz), 70.08, 44.07, 30.59, 25.06.

$^{19}\text{F}$  NMR (376 MHz, Chloroform-*d*)  $\delta$  -91.37 (d,  $J = 44.1$  Hz, 1F), -91.53 (d,  $J = 44.2$  Hz, 1F).

HRMS (ESI)  $m/z$  calcd. for  $\text{C}_{18}\text{H}_{18}\text{ClF}_2\text{O}$   $[\text{M}+\text{H}]^+$  : 323.1009, found: 323.1001.

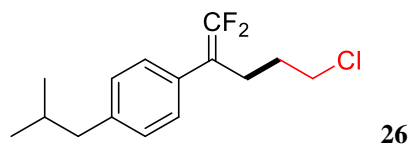

Purification by column chromatography on silica gel (hexane) afforded **26** as a colorless oil (29.9 mg, 55% yield).

$^1\text{H}$  NMR (400 MHz, Chloroform-*d*)  $\delta$  7.23 (d,  $J = 7.6$  Hz, 2H), 7.15 (d,  $J = 8.2$  Hz, 2H), 3.52 (t,  $J = 6.5$  Hz, 2H), 2.58 (ddt,  $J = 8.6, 4.7, 2.3$  Hz, 2H), 2.48 (d,  $J = 7.2$  Hz, 2H), 1.92 – 1.82 (m, 3H), 0.93 (d,  $J = 6.6$  Hz, 6H).

$^{13}\text{C}$  NMR (101 MHz,  $\text{CDCl}_3$ )  $\delta$  153.72 (dd,  $J = 290.7, 287.4$  Hz), 141.04, 130.28, 129.29, 127.80 (t,  $J = 3.3$  Hz), 91.02 (dd,  $J = 20.7, 14.2$  Hz), 45.07, 44.07, 30.64, 30.12, 24.98, 22.36.

$^{19}\text{F}$  NMR (376 MHz, Chloroform- $d$ )  $\delta$  -90.83 (d,  $J = 42.9$  Hz, 1F), -91.02 (d,  $J = 42.9$  Hz, 1F).

HRMS (ESI)  $m/z$  calcd. for  $\text{C}_{15}\text{H}_{20}\text{ClF}_2$   $[\text{M}+\text{H}]^+$  : 273.1216, found: 273.1213.

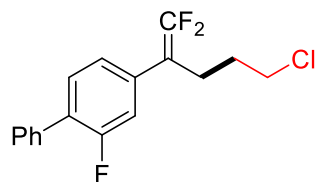

Purification by column chromatography on silica gel (hexane/ethyl acetate = 50/1, v/v) afforded **27** as a brown solid (26.0 mg, 42% yield).

$^1\text{H}$  NMR (400 MHz, Chloroform- $d$ )  $\delta$  7.61 – 7.54 (m, 2H), 7.46 (td,  $J = 8.1, 7.6, 5.3$  Hz, 3H), 7.43 – 7.36 (m, 1H), 7.18 (dd,  $J = 16.4, 10.0$  Hz, 2H), 3.56 (t,  $J = 6.4$  Hz, 2H), 2.66 – 2.59 (m, 2H), 1.91 (dt,  $J = 13.4, 6.5$  Hz, 2H).

$^{13}\text{C}$  NMR (101 MHz,  $\text{CDCl}_3$ )  $\delta$  159.66 (d,  $J = 248.2$  Hz), 154.06 (dd,  $J = 292.8, 289.0$  Hz), 135.22, 134.08, 130.77 (d,  $J = 4.2$  Hz), 128.92 (d,  $J = 3.0$  Hz), 128.50, 128.11 (d,  $J = 13.7$  Hz), 127.84, 124.00 (dd,  $J = 7.0, 3.5$  Hz), 115.80 (dt,  $J = 24.2, 3.8$  Hz), 90.45 (dd,  $J = 22.6, 13.8$  Hz), 43.94, 30.60, 24.71.

$^{19}\text{F}$  NMR (376 MHz, Chloroform- $d$ )  $\delta$  -88.53 (d,  $J = 38.1$  Hz, 1F), -88.68 (d,  $J = 38.1$  Hz, 1F), -117.50, 1F.

HRMS (ESI)  $m/z$  calcd. for  $\text{C}_{17}\text{H}_{15}\text{ClF}_3$   $[\text{M}+\text{H}]^+$  : 311.0809, found: 311.0803.

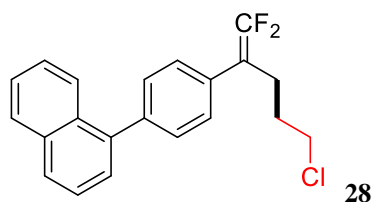

Purification by column chromatography on silica gel (hexane/ethyl acetate = 50/1, v/v) afforded **28** as a white solid (36.3 mg, 53% yield).

$^1\text{H}$  NMR (400 MHz, Chloroform- $d$ )  $\delta$  7.98 – 7.92 (m, 2H), 7.90 (d,  $J = 8.2$  Hz, 1H), 7.58 – 7.51 (m, 4H), 7.51 – 7.44 (m, 4H), 3.60 (t,  $J = 6.5$  Hz, 2H), 2.69 (ddd,  $J = 8.6, 5.9, 2.3$  Hz, 2H), 1.97 (dt,  $J = 13.6, 6.6$  Hz, 2H).

$^{13}\text{C}$  NMR (101 MHz,  $\text{CDCl}_3$ )  $\delta$  153.96 (t,  $J = 289.6$  Hz), 139.95, 139.59, 133.86, 132.03, 131.54, 130.27, 128.35, 128.00 (t,  $J = 3.4$  Hz), 127.83, 126.96, 126.14, 125.89, 125.86, 125.39, 91.06 (dd,  $J = 19.0, 16.3$  Hz), 44.12, 30.74, 25.01.

$^{19}\text{F}$  NMR (376 MHz, Chloroform- $d$ )  $\delta$  (-89.93, 1F), (-89.94, 1F).

HRMS (ESI)  $m/z$  calcd. for  $\text{C}_{21}\text{H}_{18}\text{ClF}_2$   $[\text{M}+\text{H}]^+$  : 343.1060, found: 343.1058.

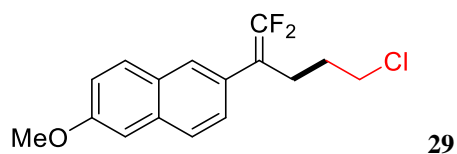

Purification by column chromatography on silica gel (hexane/ethyl acetate = 50/1, v/v) afforded **29** as a white solid (34.9 mg, 59% yield).

**<sup>1</sup>H NMR** (400 MHz, Chloroform-*d*)  $\delta$  7.77 – 7.70 (m, 3H), 7.41 (d, *J* = 8.6 Hz, 1H), 7.21 – 7.11 (m, 2H), 3.94 (s, 3H), 3.53 (t, *J* = 6.5 Hz, 2H), 2.68 (tt, *J* = 8.4, 2.2 Hz, 2H), 1.89 (p, *J* = 6.6 Hz, 2H).

**<sup>13</sup>C NMR** (101 MHz, CDCl<sub>3</sub>)  $\delta$  158.04, 153.91 (dd, *J* = 290.4, 288.5 Hz), 133.72, 129.42, 128.77, 128.13, 127.09, 127.06, 126.42 (t, *J* = 3.3 Hz), 119.25, 105.62, 91.25 (dd, *J* = 20.0, 15.3 Hz), 55.34, 44.07, 30.63, 25.05.

**<sup>19</sup>F NMR** (376 MHz, Chloroform-*d*)  $\delta$  -90.57 (d, *J* = 42.3 Hz, 1F), -90.74 (d, *J* = 42.3 Hz, 1F).

**HRMS** (ESI) *m/z* calcd. for C<sub>16</sub>H<sub>16</sub>ClF<sub>2</sub>O [M+H]<sup>+</sup> : 297.0852, found: 297.0847.

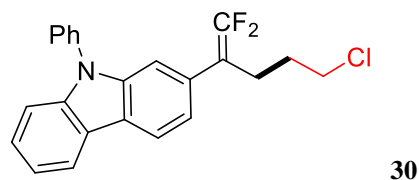

Purification by column chromatography on silica gel (hexane/ethyl acetate = 20/1, v/v) afforded **30** as a brown solid (38.1 mg, 50% yield).

**<sup>1</sup>H NMR** (400 MHz, Chloroform-*d*)  $\delta$  8.15 (dd, *J* = 7.9, 4.7 Hz, 2H), 7.65 (t, *J* = 7.7 Hz, 2H), 7.61 – 7.57 (m, 2H), 7.54 – 7.49 (m, 1H), 7.45 – 7.42 (m, 2H), 7.37 (s, 1H), 7.32 (ddd, *J* = 8.0, 5.2, 2.9 Hz, 1H), 7.26 (d, *J* = 8.0 Hz, 1H), 3.51 (t, *J* = 6.4 Hz, 2H), 2.65 (dd, *J* = 8.6, 4.0 Hz, 2H), 1.87 (p, *J* = 6.6 Hz, 2H).

**<sup>13</sup>C NMR** (101 MHz, CDCl<sub>3</sub>)  $\delta$  153.77 (dd, *J* = 290.0, 287.9 Hz), 141.42, 141.01, 137.47, 130.87, 130.00, 127.64, 127.14, 126.19, 123.01, 122.75, 120.36, 120.33, 120.21, 120.17, 109.86, 109.53 (t, *J* = 3.3 Hz), 91.96 (dd, *J* = 21.4, 14.0 Hz), 44.13, 30.65, 25.43.

**<sup>19</sup>F NMR** (376 MHz, Chloroform-*d*)  $\delta$  -90.65 (d, *J* = 42.3 Hz, 1F), -90.92 (d, *J* = 42.3 Hz, 1F).

**HRMS** (ESI) *m/z* calcd. for C<sub>23</sub>H<sub>19</sub>ClF<sub>2</sub>N [M+H]<sup>+</sup> : 382.1169, found: 382.1159.

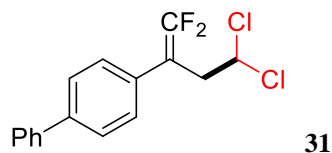

Purification by column chromatography on silica gel (hexane) afforded **31** as a white solid (46.8 mg, 75% yield).

**<sup>1</sup>H NMR** (400 MHz, Chloroform-*d*)  $\delta$  7.63 (t, *J* = 7.8 Hz, 4H), 7.48 (t, *J* = 7.5 Hz, 2H), 7.40 (d, *J* = 8.1 Hz, 3H), 5.60 (t, *J* = 6.7 Hz, 1H), 3.35 (d, *J* = 6.8 Hz, 2H).

**<sup>13</sup>C NMR** (101 MHz, CDCl<sub>3</sub>)  $\delta$  155.20 (t, *J* = 291.9 Hz), 141.04, 140.27, 130.38, 128.89, 128.73 (t, *J* = 3.0 Hz), 127.66, 127.57, 127.06, 88.66 (dd, *J* = 20.5, 18.3 Hz), 70.43 (t, *J* = 4.5 Hz), 42.24.

**<sup>19</sup>F NMR** (376 MHz, Chloroform-*d*)  $\delta$  -87.21 (d,  $J$  = 32.7 Hz, 1F), -88.04 (d,  $J$  = 32.6 Hz, 1F).

**HRMS** (ESI)  $m/z$  calcd. for C<sub>16</sub>H<sub>13</sub>Cl<sub>2</sub>F<sub>2</sub> [M+H]<sup>+</sup> : 313.0357, found: 313.0355.

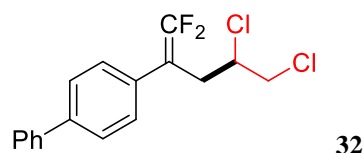

Purification by column chromatography on silica gel (hexane) afforded **32** as a white solid (33.2 mg, 51% yield).

**<sup>1</sup>H NMR** (400 MHz, Chloroform-*d*)  $\delta$  7.64 (t,  $J$  = 7.0 Hz, 4H), 7.45 (ddd,  $J$  = 21.9, 14.5, 7.4 Hz, 5H), 4.08 – 3.95 (m, 1H), 3.79 (dd,  $J$  = 11.5, 4.8 Hz, 1H), 3.70 (dd,  $J$  = 11.4, 7.3 Hz, 1H), 3.20 (dq,  $J$  = 15.0, 3.3 Hz, 1H), 2.89 (dd,  $J$  = 15.0, 9.3 Hz, 1H).

**<sup>13</sup>C NMR** (101 MHz, CDCl<sub>3</sub>)  $\delta$  154.78 (t,  $J$  = 290.6 Hz), 140.78, 140.35, 130.91, 128.87, 128.73 (t,  $J$  = 3.1 Hz), 127.59, 127.47, 127.05, 88.84 (t,  $J$  = 18.9 Hz), 58.00, 47.83, 33.89.

**<sup>19</sup>F NMR** (376 MHz, Chloroform-*d*)  $\delta$  -88.48 (d,  $J$  = 2.8 Hz, 2F).

**HRMS** (ESI)  $m/z$  calcd. for C<sub>17</sub>H<sub>15</sub>Cl<sub>2</sub>F<sub>2</sub> [M+H]<sup>+</sup> : 327.0513, found: 327.0510.

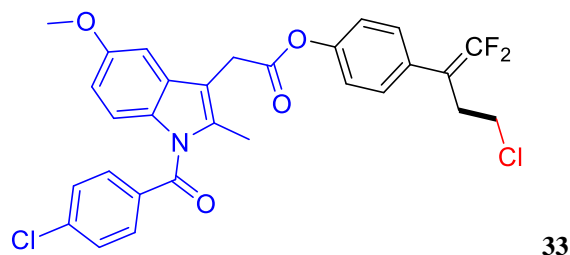

Purification by column chromatography on silica gel (hexane/ethyl acetate = 2/1, v/v) afforded **33** as a white solid (72.4 mg, 65% yield).

**<sup>1</sup>H NMR** (400 MHz, Chloroform-*d*)  $\delta$  7.69 (d,  $J$  = 8.6 Hz, 2H), 7.48 (d,  $J$  = 8.6 Hz, 2H), 7.31 (d,  $J$  = 8.1 Hz, 2H), 7.13 – 7.04 (m, 3H), 6.91 (d,  $J$  = 9.0 Hz, 1H), 6.71 (dd,  $J$  = 9.0, 2.5 Hz, 1H), 3.92 (s, 2H), 3.85 (s, 3H), 3.46 (t,  $J$  = 7.0 Hz, 2H), 2.84 (ddt,  $J$  = 7.0, 4.9, 2.1 Hz, 2H), 2.47 (s, 3H).

**<sup>13</sup>C NMR** (101 MHz, CDCl<sub>3</sub>)  $\delta$  169.12, 168.28, 156.18, 154.51 (dd,  $J$  = 292.3, 290.5 Hz), 150.11, 139.38, 136.25, 133.84, 131.19, 130.90, 130.47, 130.04, 129.44 (t,  $J$  = 3.1 Hz), 129.15, 121.93, 121.69, 115.02, 111.85, 111.80, 101.30, 88.89 (dd,  $J$  = 21.7, 15.9 Hz), 55.74, 41.52, 31.26, 30.56, 13.37.

**<sup>19</sup>F NMR** (376 MHz, Chloroform-*d*)  $\delta$  -88.86 (d,  $J$  = 37.4 Hz, 1F), -89.26 (d,  $J$  = 37.4 Hz, 1F).

**HRMS** (ESI)  $m/z$  calcd. for C<sub>29</sub>H<sub>24</sub>Cl<sub>2</sub>F<sub>2</sub>NO<sub>4</sub> [M+H]<sup>+</sup> : 558.1050, found: 558.1053.

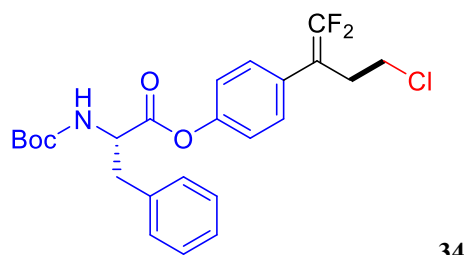

Purification by column chromatography on silica gel (hexane/ethyl acetate = 5/1, v/v) afforded **34** as a white solid (55.8 mg, 60% yield)

**<sup>1</sup>H NMR** (400 MHz, Chloroform-*d*)  $\delta$  7.34 (dd,  $J = 15.0, 7.6$  Hz, 5H), 7.26 (d,  $J = 8.6$  Hz, 2H), 7.02 (d,  $J = 8.5$  Hz, 2H), 5.08 (d,  $J = 7.7$  Hz, 1H), 4.83 (q,  $J = 7.4, 6.9$  Hz, 1H), 3.48 (t,  $J = 7.0$  Hz, 2H), 3.25 (d,  $J = 6.0$  Hz, 2H), 2.85 (tt,  $J = 7.1, 2.2$  Hz, 2H), 1.46 (s, 9H).

**<sup>13</sup>C NMR** (101 MHz, CDCl<sub>3</sub>)  $\delta$  170.50, 154.54 (dd,  $J = 291.5, 289.5$  Hz), 149.75, 135.68, 130.19, 129.47, 129.44, 128.75, 127.31, 121.61, 88.88 (dd,  $J = 22.2, 15.6$  Hz), 80.21, 54.69, 41.55, 38.34, 31.26, 28.30.

**<sup>19</sup>F NMR** (376 MHz, Chloroform-*d*)  $\delta$  -88.77 (d,  $J = 37.4$  Hz, 1F), -89.19 (d,  $J = 37.4$  Hz, 1F).

**HRMS** (ESI)  $m/z$  calcd. for C<sub>24</sub>H<sub>27</sub>ClF<sub>2</sub>NO<sub>4</sub> [M+H]<sup>+</sup> : 466.1591, found: 466.1591.

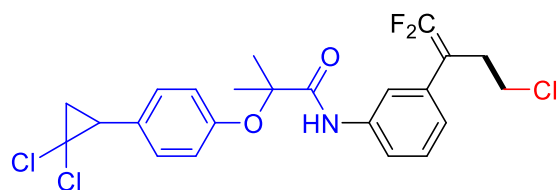

Purification by column chromatography on silica gel (hexane/ethyl acetate = 10/1, v/v) afforded **35** as a white solid (70.1 mg, 75% yield)

**<sup>1</sup>H NMR** (400 MHz, Chloroform-*d*)  $\delta$  8.63 (s, 1H), 7.63 (s, 1H), 7.52 – 7.48 (m, 1H), 7.36 (t,  $J = 7.9$  Hz, 1H), 7.21 (d,  $J = 8.5$  Hz, 2H), 7.10 (d,  $J = 7.1$  Hz, 1H), 7.00 (d,  $J = 8.6$  Hz, 2H), 3.49 (t,  $J = 7.0$  Hz, 2H), 2.91 – 2.84 (m, 3H), 1.99 (dd,  $J = 10.7, 7.5$  Hz, 1H), 1.82 (t,  $J = 7.9$  Hz, 1H), 1.60 (s, 6H).

**<sup>13</sup>C NMR** (101 MHz, CDCl<sub>3</sub>)  $\delta$  172.97, 154.51 (dd,  $J = 293.4, 290.0$  Hz), 153.28, 137.87, 133.30, 130.32, 129.91, 129.33, 124.52 (t,  $J = 3.0$  Hz), 121.73, 119.69 (t,  $J = 3.3$  Hz), 119.22, 89.39 (dd,  $J = 21.7, 15.8$  Hz), 82.17, 60.69, 41.66, 34.83, 31.24, 25.91, 24.98, 24.96.

**<sup>19</sup>F NMR** (376 MHz, Chloroform-*d*)  $\delta$  -88.60 (d,  $J = 37.5$  Hz, 1F), -89.39 (d,  $J = 37.5$  Hz, 1F).

**HRMS** (ESI)  $m/z$  calcd. for C<sub>23</sub>H<sub>23</sub>Cl<sub>3</sub>F<sub>2</sub>NO<sub>2</sub> [M+H]<sup>+</sup> : 488.0757, found: 488.0761.

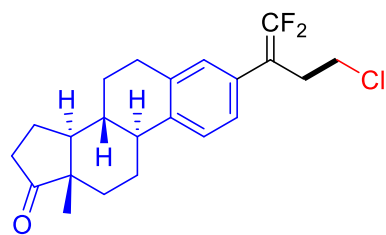

Purification by column chromatography on silica gel (hexane/ethyl acetate = 10/1, v/v) afforded **36** as a white solid (43.8 mg, 58% yield).

**<sup>1</sup>H NMR** (400 MHz, Chloroform-*d*)  $\delta$  7.29 (d,  $J = 7.9$  Hz, 1H), 7.11 – 7.01 (m, 2H), 3.47 (t,  $J = 7.0$  Hz, 2H), 2.96 – 2.89 (m, 2H), 2.84 (d,  $J = 6.7$  Hz, 2H), 2.51 (dd,  $J = 18.7, 8.6$  Hz, 1H), 2.41 (t,  $J = 12.6$  Hz, 1H), 2.31 (d,  $J = 9.7$  Hz, 1H), 2.20 – 2.12 (m, 1H), 2.06 (t,  $J = 9.8$  Hz, 2H), 1.97 (d,  $J = 10.8$  Hz, 1H), 1.62 (q,  $J = 9.6$  Hz, 2H), 1.57 – 1.44 (m, 4H), 0.92 (s, 3H).



$^{13}\text{C}$  NMR (101 MHz,  $\text{CDCl}_3$ )  $\delta$  154.39 (t,  $J = 289.7$  Hz), 139.44, 136.86, 129.67, 128.79, 125.66, 125.62, 89.25 (dd,  $J = 20.9, 16.4$  Hz), 50.50, 47.96, 44.34, 41.79, 38.03, 35.84, 31.57, 31.26, 29.38, 26.42, 25.60, 21.57, 13.83.

$^{19}\text{F}$  NMR (376 MHz, Chloroform-*d*)  $\delta$  -89.46 (d,  $J = 39.3$  Hz, 1F), -89.97 (d,  $J = 39.3$  Hz, 1F).

HRMS (ESI)  $m/z$  calcd. for  $\text{C}_{22}\text{H}_{26}\text{ClF}_2\text{O}$   $[\text{M}+\text{H}]^+$  : 379.1635, found: 379.1635.

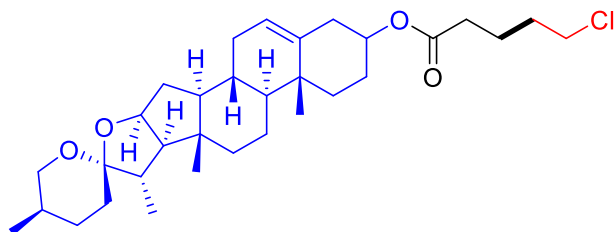

**37**

Purification by column chromatography on silica gel (hexane/ethyl acetate = 20/1, v/v) afforded **37** as a white solid (26.6 mg, 25% yield).

$^1\text{H}$  NMR (400 MHz, Chloroform-*d*)  $\delta$  5.37 (d,  $J = 5.0$  Hz, 1H), 4.67 – 4.55 (m, 1H), 4.41 (td,  $J = 8.0, 6.5$  Hz, 1H), 3.55 (t,  $J = 6.1$  Hz, 2H), 3.47 (ddd,  $J = 11.0, 4.6, 2.0$  Hz, 1H), 3.37 (t,  $J = 10.9$  Hz, 1H), 2.36 – 2.25 (m, 4H), 2.00 (dtd,  $J = 17.1, 8.2, 7.4, 5.1$  Hz, 2H), 1.89 – 1.74 (m, 8H), 1.69 – 1.40 (m, 10H), 1.33 – 1.24 (m, 1H), 1.22 – 1.07 (m, 3H), 1.04 (s, 3H), 0.97 (d,  $J = 7.0$  Hz, 4H), 0.79 (t,  $J = 3.1$  Hz, 6H).

$^{13}\text{C}$  NMR (101 MHz,  $\text{CDCl}_3$ )  $\delta$  172.51, 139.64, 122.38, 109.23, 80.78, 73.88, 66.82, 62.11, 56.43, 49.95, 44.43, 41.61, 40.25, 39.72, 38.11, 36.94, 36.72, 33.75, 32.03, 31.85, 31.40, 30.29, 28.80, 27.77, 22.33, 20.81, 19.32, 17.11, 16.26, 14.50.

HRMS (ESI)  $m/z$  calcd. for  $\text{C}_{32}\text{H}_{50}\text{ClO}_4$   $[\text{M}+\text{H}]^+$  : 533.3392, found: 533.3390.

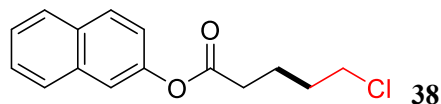

**38**

Purification by column chromatography on silica gel (hexane/ethyl acetate = 20/1, v/v) afforded **38** as a white solid (22.5 mg, 43% yield).

$^1\text{H}$  NMR (400 MHz, Chloroform-*d*)  $\delta$  = 7.85 (ddd,  $J = 16.4, 9.0, 6.0$ , 3H), 7.58 (d,  $J = 2.2$ , 1H), 7.54 – 7.45 (m, 2H), 7.24 (dd,  $J = 8.9, 2.3$ , 1H), 3.64 (t,  $J = 6.2$ , 2H), 2.69 (t,  $J = 7.1$ , 2H), 2.00 – 1.93 (m, 4H).

$^{13}\text{C}$  NMR (101 MHz,  $\text{CDCl}_3$ )  $\delta$  = 171.77, 148.30, 133.77, 131.47, 129.41, 127.77, 127.63, 126.58, 125.71, 121.07, 118.46, 44.39, 33.58, 31.83, 22.28.

HRMS (ESI)  $m/z$  calcd. for  $\text{C}_{15}\text{H}_{16}\text{ClO}_2$   $[\text{M}+\text{H}]^+$  : 263.0833, found: 263.0833.

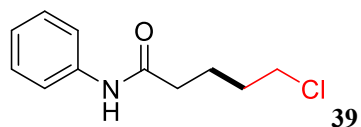

**39**

Purification by column chromatography on silica gel (hexane/ethyl acetate = 10/1, v/v) afforded **39** as a white solid (21.5 mg, 51% yield).

**<sup>1</sup>H NMR** (400 MHz, Chloroform-*d*)  $\delta$  = 7.52 (d,  $J$  = 7.9, 2H), 7.47 (s, 1H), 7.32 (t,  $J$  = 7.8, 2H), 7.11 (t,  $J$  = 7.4, 1H), 3.57 (t,  $J$  = 5.9, 2H), 2.40 (dd,  $J$  = 8.6, 4.8, 2H), 1.92 – 1.81 (m, 4H).

**<sup>13</sup>C NMR** (101 MHz, CDCl<sub>3</sub>)  $\delta$  = 170.69, 137.81, 128.98, 124.33, 119.92, 44.55, 36.62, 31.89, 22.81.

**HRMS** (ESI)  $m/z$  calcd. for C<sub>11</sub>H<sub>15</sub>CINO [M+H]<sup>+</sup> : 212.0837, found: 212.0847.

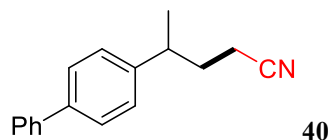

Purification by column chromatography on silica gel (hexane/ethyl acetate = 100/1, v/v) afforded **40** as a white solid (21.2 mg, 45% yield).

**<sup>1</sup>H NMR** (400 MHz, Chloroform-*d*)  $\delta$  7.58 (ddd,  $J$  = 10.4, 7.6, 1.6 Hz, 4H), 7.48 – 7.41 (m, 2H), 7.39 – 7.33 (m, 1H), 7.28 (d,  $J$  = 7.9 Hz, 2H), 2.92 (ddd,  $J$  = 13.7, 11.1, 6.5 Hz, 1H), 2.28 (ddd,  $J$  = 16.8, 7.6, 5.8 Hz, 1H), 2.22 – 2.10 (m, 1H), 2.07 – 1.87 (m, 2H), 1.36 (d,  $J$  = 6.9 Hz, 3H).

**<sup>13</sup>C NMR** (101 MHz, CDCl<sub>3</sub>)  $\delta$  143.63, 140.75, 139.75, 128.76, 127.49, 127.33, 127.22, 126.98, 119.58, 38.60, 33.56, 21.91, 15.50.

**HRMS** (ESI)  $m/z$  calcd. for C<sub>17</sub>H<sub>18</sub>N [M+H]<sup>+</sup> : 236.1434, found: 236.1435.

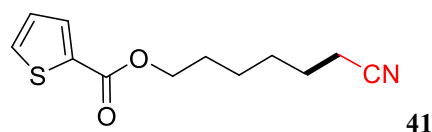

Purification by column chromatography on silica gel (hexane/ethyl acetate = 20/1, v/v) afforded **41** as a colorless oil (22.8 mg, 48% yield).

**<sup>1</sup>H NMR** (600 MHz, Chloroform-*d*)  $\delta$  7.80 (dd,  $J$  = 3.8, 1.4 Hz, 1H), 7.56 (dd,  $J$  = 5.0, 1.3 Hz, 1H), 7.11 (dd,  $J$  = 5.0, 3.7 Hz, 1H), 4.30 (t,  $J$  = 6.5 Hz, 2H), 2.36 (t,  $J$  = 7.1 Hz, 2H), 1.80 – 1.75 (m, 2H), 1.69 (p,  $J$  = 7.2 Hz, 2H), 1.56 – 1.44 (m, 4H).

**<sup>13</sup>C NMR** (151 MHz, CDCl<sub>3</sub>)  $\delta$  162.27, 133.88, 133.36, 132.33, 127.78, 119.68, 64.85, 28.42, 28.31, 25.28, 17.08.

**HRMS** (ESI)  $m/z$  calcd. for C<sub>12</sub>H<sub>16</sub>NO<sub>2</sub>S [M+H]<sup>+</sup> : 238.0896, found: 238.0897.

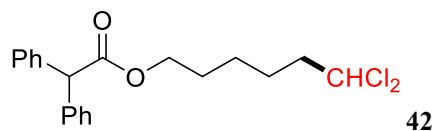

Purification by column chromatography on silica gel (hexane/ethyl acetate = 20/1, v/v) afforded **42** as a colorless oil (35.7 mg, 49% yield).

**<sup>1</sup>H NMR** (600 MHz, Chloroform-*d*)  $\delta$  7.31 (d,  $J$  = 3.8 Hz, 8H), 7.26 (td,  $J$  = 5.1, 3.1 Hz, 2H), 5.66 (t,  $J$  = 6.0 Hz, 1H), 5.02 (s, 1H), 4.15 (t,  $J$  = 6.5 Hz, 2H), 2.10 (dt,  $J$  = 8.1, 6.0 Hz, 2H), 1.66 – 1.60 (m, 2H), 1.52 – 1.45 (m, 2H), 1.31 – 1.25 (m, 2H).

$^{13}\text{C}$  NMR (151 MHz, Chloroform-*d*)  $\delta$  172.53, 138.70, 128.64, 128.62, 127.31, 73.40, 64.82, 57.23, 43.38, 28.29, 25.46, 24.86.

HRMS (ESI)  $m/z$  calcd. for  $\text{C}_{20}\text{H}_{23}\text{Cl}_2\text{O}_2$   $[\text{M}+\text{H}]^+$  : 365.1070, found: 365.1073.

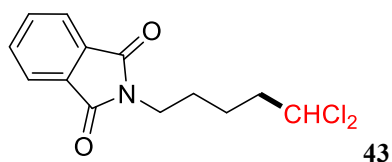

Purification by column chromatography on silica gel (hexane/ethyl acetate = 10/1, v/v) afforded **43** as a colorless oil (24.5 mg, 43% yield).

$^1\text{H}$  NMR (600 MHz, Chloroform-*d*)  $\delta$  7.77 (dd,  $J$  = 5.5, 3.1 Hz, 2H), 7.65 (dd,  $J$  = 5.5, 3.1 Hz, 2H), 5.67 (t,  $J$  = 6.0 Hz, 1H), 3.64 (t,  $J$  = 7.2 Hz, 2H), 2.21 – 2.15 (m, 2H), 1.70 – 1.64 (m, 2H), 1.58 – 1.50 (m, 2H).

$^{13}\text{C}$  NMR (151 MHz,  $\text{CDCl}_3$ )  $\delta$  168.36, 133.99, 132.07, 123.27, 73.15, 42.92, 37.47, 27.54, 23.18.

HRMS (ESI)  $m/z$  calcd. for  $\text{C}_{13}\text{H}_{14}\text{Cl}_2\text{NO}_2$   $[\text{M}+\text{H}]^+$  : 286.0396, found: 286.0395.

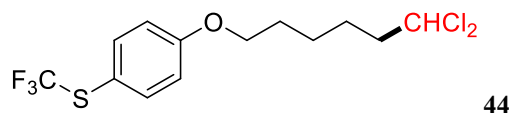

Purification by column chromatography on silica gel (hexane/ethyl acetate = 20/1, v/v) afforded **44** as a colorless oil (36.7 mg, 53% yield).

$^1\text{H}$  NMR (600 MHz, Chloroform-*d*)  $\delta$  7.56 (d,  $J$  = 8.7 Hz, 2H), 6.91 (d,  $J$  = 8.8 Hz, 2H), 5.77 (t,  $J$  = 6.0 Hz, 1H), 3.98 (t,  $J$  = 6.3 Hz, 2H), 2.23 (dd,  $J$  = 15.5, 6.0 Hz, 2H), 1.87 – 1.79 (m, 2H), 1.64 (p,  $J$  = 7.4 Hz, 2H), 1.54 (q,  $J$  = 8.4 Hz, 2H).

$^{13}\text{C}$  NMR (151 MHz, Chloroform-*d*)  $\delta$  161.29, 138.30, 129.64 (q,  $J$  = 308.1 Hz), 115.45, 73.43, 67.80, 43.43, 28.87, 25.63, 25.12.

$^{19}\text{F}$  NMR (565 MHz, Chloroform-*d*)  $\delta$  -43.92, 3F.

HRMS (ESI)  $m/z$  calcd. for  $\text{C}_{13}\text{H}_{16}\text{Cl}_2\text{F}_3\text{OS}$   $[\text{M}+\text{H}]^+$  : 347.0246, found: 347.0245.

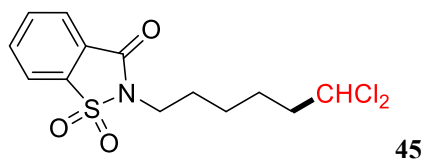

Purification by column chromatography on silica gel (hexane/ethyl acetate = 10/1, v/v) afforded **45** as a colorless oil (31.5 mg, 47% yield).

$^1\text{H}$  NMR (600 MHz, Chloroform-*d*)  $\delta$  8.06 (d,  $J$  = 7.1 Hz, 1H), 7.92 (d,  $J$  = 7.4 Hz, 1H), 7.89 – 7.85 (m, 1H), 7.85 – 7.82 (m, 1H), 5.75 (t,  $J$  = 6.0 Hz, 1H), 3.79 (t,  $J$  = 7.3 Hz, 2H), 2.24 – 2.19 (m, 2H), 1.89 (p,  $J$  = 7.5 Hz, 2H), 1.63 (ddt,  $J$  = 11.1, 7.8, 3.8 Hz, 2H), 1.48 (p,  $J$  = 7.8 Hz, 2H).

$^{13}\text{C}$  NMR (151 MHz,  $\text{CDCl}_3$ )  $\delta$  159.01, 137.68, 134.77, 134.36, 127.38, 125.17, 120.94, 73.36, 43.30, 39.12, 28.14, 25.73, 25.35.

HRMS (ESI)  $m/z$  calcd. for  $\text{C}_{13}\text{H}_{16}\text{Cl}_2\text{NO}_3\text{S}$   $[\text{M}+\text{H}]^+$  : 336.0222, found: 336.0222.



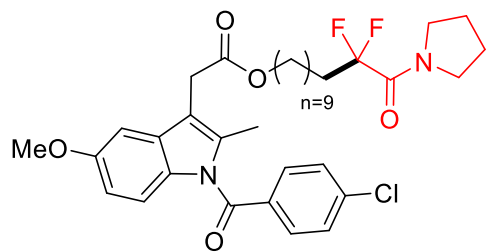

**48**

Purification by column chromatography on silica gel (hexane/ethyl acetate = 4/1, v/v) afforded **48** as a yellow oil (72.2 mg, 56% yield).

**<sup>1</sup>H NMR** (600 MHz, Chloroform-*d*)  $\delta$  7.66 (d,  $J$  = 8.5 Hz, 2H), 7.47 (d,  $J$  = 8.5 Hz, 2H), 6.97 (d,  $J$  = 2.5 Hz, 1H), 6.87 (d,  $J$  = 9.0 Hz, 1H), 6.67 (dd,  $J$  = 9.0, 2.6 Hz, 1H), 4.09 (t,  $J$  = 6.7 Hz, 2H), 3.83 (s, 3H), 3.68 (t,  $J$  = 6.9 Hz, 2H), 3.65 (s, 2H), 3.52 (t,  $J$  = 7.1 Hz, 2H), 2.38 (s, 3H), 2.15 – 2.05 (m, 2H), 1.95 (p,  $J$  = 6.8 Hz, 2H), 1.85 (p,  $J$  = 6.9 Hz, 2H), 1.61 (p,  $J$  = 6.8 Hz, 2H), 1.50 (qd,  $J$  = 8.8, 8.0, 6.2 Hz, 2H), 1.37 – 1.31 (m, 2H), 1.30 – 1.21 (m, 10H).

**<sup>13</sup>C NMR** (151 MHz, Chloroform-*d*)  $\delta$  170.95, 168.29, 162.48 (t,  $J$  = 30.3 Hz), 156.06, 139.24, 135.86, 133.98, 131.17, 130.83, 130.70, 129.11, 119.24 (t,  $J$  = 252.4 Hz), 114.93, 112.78, 111.68, 101.35, 65.18, 55.69, 47.33, 46.59 (t,  $J$  = 6.5 Hz), 34.28 (t,  $J$  = 23.2 Hz), 30.44, 29.43, 29.33, 29.29, 29.18, 28.62, 26.53, 25.87, 23.30, 21.46 (t,  $J$  = 4.3 Hz), 13.35.

**<sup>19</sup>F NMR** (565 MHz, Chloroform-*d*)  $\delta$  -103.26, 2F.

**HRMS** (ESI)  $m/z$  calcd. for C<sub>35</sub>H<sub>44</sub>ClF<sub>2</sub>N<sub>2</sub>O<sub>5</sub> [M+H]<sup>+</sup> : 645.2901, found: 645.2904.

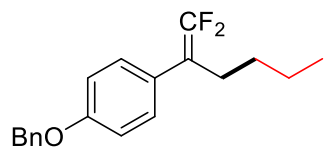

**49**

Purification by column chromatography on silica gel (hexane/ethyl acetate = 50/1, v/v) afforded **49** as a white solid (33.2 mg, 55% yield).

**<sup>1</sup>H NMR** (400 MHz, Chloroform-*d*)  $\delta$  7.47 (d,  $J$  = 7.2 Hz, 2H), 7.43 (t,  $J$  = 7.3 Hz, 2H), 7.37 (dd,  $J$  = 8.3, 5.8 Hz, 1H), 7.27 (d,  $J$  = 8.8 Hz, 2H), 7.02 – 6.98 (m, 2H), 5.10 (s, 2H), 2.44 – 2.34 (m, 2H), 1.36 (h,  $J$  = 6.4 Hz, 4H), 0.91 (t,  $J$  = 7.0 Hz, 3H).

**<sup>13</sup>C NMR** (101 MHz, CDCl<sub>3</sub>)  $\delta$  157.88, 153.48 (dd,  $J$  = 288.2, 286.4 Hz), 136.97, 129.37 (t,  $J$  = 3.3 Hz), 128.60, 127.99, 127.48, 126.33, 114.77, 91.86 (dd,  $J$  = 19.7, 15.1 Hz), 70.06, 29.89 (t,  $J$  = 2.5 Hz), 27.43, 22.11, 13.75.

**<sup>19</sup>F NMR** (376 MHz, Chloroform-*d*)  $\delta$  -92.86, 2F.

**HRMS** (ESI)  $m/z$  calcd. for C<sub>19</sub>H<sub>21</sub>F<sub>2</sub>O [M+H]<sup>+</sup> : 303.1555, found: 303.1552.

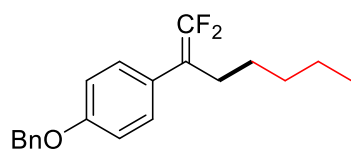

**50**

Purification by column chromatography on silica gel (hexane/ethyl acetate = 50/1, v/v) afforded **50** as a white solid (39.8 mg, 63% yield).

**<sup>1</sup>H NMR** (400 MHz, Chloroform-*d*)  $\delta$  7.49 – 7.39 (m, 4H), 7.36 (t, *J* = 7.1 Hz, 1H), 7.26 (d, *J* = 8.7 Hz, 2H), 6.99 (d, *J* = 8.8 Hz, 2H), 5.09 (s, 2H), 2.37 (dd, *J* = 10.0, 4.7 Hz, 2H), 1.38 (p, *J* = 7.0, 6.4 Hz, 2H), 1.32 – 1.26 (m, 4H), 0.89 (t, *J* = 6.7 Hz, 3H).

**<sup>13</sup>C NMR** (101 MHz, CDCl<sub>3</sub>)  $\delta$  157.87, 153.48 (dd, *J* = 288.0, 286.8 Hz), 136.97, 129.37 (t, *J* = 3.3 Hz), 128.60, 127.99, 127.48, 126.34, 114.77, 91.89 (dd, *J* = 19.7, 15.3 Hz), 70.06, 31.21, 27.68, 27.39, 22.34, 13.97.

**<sup>19</sup>F NMR** (376 MHz, Chloroform-*d*)  $\delta$  -92.87 (d, *J* = 1.5 Hz, 2F).

**HRMS** (ESI) *m/z* calcd. for C<sub>20</sub>H<sub>23</sub>F<sub>2</sub>O [M+H]<sup>+</sup> :317.1711, found: 317.1709.

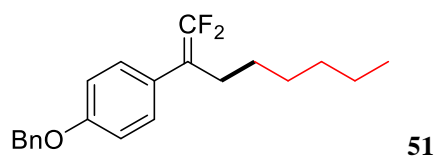

Purification by column chromatography on silica gel (hexane/ethyl acetate = 50/1, v/v) afforded **51** as a white solid (40.3 mg, 61% yield).

**<sup>1</sup>H NMR** (400 MHz, Chloroform-*d*)  $\delta$  7.49 – 7.39 (m, 4H), 7.36 (dd, *J* = 8.3, 5.8 Hz, 1H), 7.26 (d, *J* = 8.8 Hz, 2H), 6.99 (d, *J* = 8.8 Hz, 2H), 5.09 (s, 2H), 2.37 (dd, *J* = 9.8, 4.7 Hz, 2H), 1.41 – 1.21 (m, 8H), 0.89 (t, *J* = 6.8 Hz, 3H).

**<sup>13</sup>C NMR** (101 MHz, CDCl<sub>3</sub>)  $\delta$  157.89, 153.49 (t, *J* = 288.9 Hz), 136.99, 129.38 (t, *J* = 3.3 Hz), 128.61, 128.00, 127.49, 126.35, 114.78, 91.91 (dd, *J* = 19.4, 15.6 Hz), 70.06, 31.52, 28.69, 27.73, 27.70, 22.58, 14.01.

**<sup>19</sup>F NMR** (376 MHz, Chloroform-*d*)  $\delta$  -92.86, 2F.

**HRMS** (ESI) *m/z* calcd. for C<sub>21</sub>H<sub>25</sub>F<sub>2</sub>O [M+H]<sup>+</sup> : 331.1868, found: 331.1868.

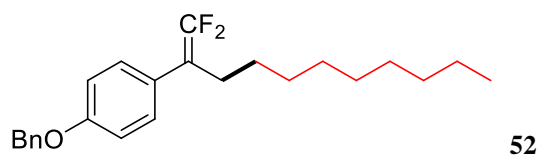

Purification by column chromatography on silica gel (hexane/ethyl acetate = 50/1, v/v) afforded **52** as a white solid (41.7 mg, 56% yield).

**<sup>1</sup>H NMR** (400 MHz, Chloroform-*d*)  $\delta$  7.48 – 7.39 (m, 4H), 7.37 (d, *J* = 7.1 Hz, 1H), 7.28 – 7.23 (m, 2H), 6.99 (d, *J* = 8.8 Hz, 2H), 5.09 (s, 2H), 2.44 – 2.29 (m, 2H), 1.45 – 1.16 (m, 14H), 0.91 (t, *J* = 6.9 Hz, 3H).

**<sup>13</sup>C NMR** (101 MHz, CDCl<sub>3</sub>)  $\delta$  157.88, 153.49 (t, *J* = 288.0 Hz), 136.98, 129.38 (t, *J* = 3.3 Hz), 128.60, 127.99, 127.48, 126.36, 114.78, 91.91 (dd, *J* = 19.3, 15.6 Hz), 70.07, 31.87, 29.51, 29.30, 29.26, 29.02, 27.72, 22.66, 14.08.

**<sup>19</sup>F NMR** (376 MHz, Chloroform-*d*)  $\delta$  -92.85, 2F.

**HRMS** (ESI) *m/z* calcd. for C<sub>24</sub>H<sub>31</sub>F<sub>2</sub>O [M+H]<sup>+</sup> : 373.2337, found: 373.2343.

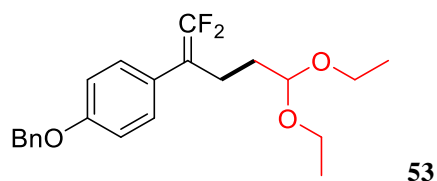

Purification by column chromatography on silica gel (hexane/ethyl acetate = 50/1, v/v) afforded **53** as a white solid (52.6 mg, 70% yield).

**<sup>1</sup>H NMR** (400 MHz, Chloroform-*d*)  $\delta$  7.43 (dt,  $J$  = 14.8, 7.5 Hz, 4H), 7.35 (t,  $J$  = 7.0 Hz, 1H), 7.26 (d,  $J$  = 8.6 Hz, 2H), 6.99 (d,  $J$  = 8.7 Hz, 2H), 5.08 (s, 2H), 4.48 (t,  $J$  = 5.7 Hz, 1H), 3.67 – 3.58 (m, 2H), 3.50 – 3.41 (m, 2H), 2.47 (dd,  $J$  = 10.3, 5.0 Hz, 2H), 1.74 – 1.67 (m, 2H), 1.21 (t,  $J$  = 7.0 Hz, 6H).

**<sup>13</sup>C NMR** (101 MHz, CDCl<sub>3</sub>)  $\delta$  157.98, 153.37 (t,  $J$  = 287.9 Hz), 136.94, 129.39 (t,  $J$  = 3.3 Hz), 128.60, 127.99, 127.45, 125.92, 114.88, 102.11, 91.36 (dd,  $J$  = 19.3, 16.1 Hz), 70.05, 61.15, 31.75, 23.11, 15.28.

**<sup>19</sup>F NMR** (376 MHz, Chloroform-*d*)  $\delta$  -92.21, 2F.

**HRMS** (ESI)  $m/z$  calcd. for C<sub>22</sub>H<sub>27</sub>F<sub>2</sub>O<sub>3</sub> [M+H]<sup>+</sup> : 377.1923, found: 377.1920.

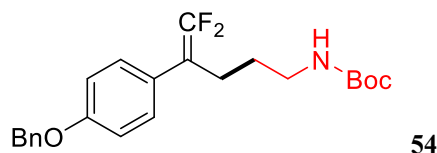

Purification by column chromatography on silica gel (hexane/ethyl acetate = 20/1, v/v) afforded **54** as a white solid (45.1 mg, 56% yield).

**<sup>1</sup>H NMR** (400 MHz, Chloroform-*d*)  $\delta$  7.46 – 7.39 (m, 4H), 7.35 (dd,  $J$  = 8.3, 5.8 Hz, 1H), 7.24 (d,  $J$  = 8.5 Hz, 2H), 6.98 (d,  $J$  = 8.8 Hz, 2H), 5.08 (s, 2H), 4.53 (s, 1H), 3.12 (d,  $J$  = 6.2 Hz, 2H), 2.46 – 2.38 (m, 2H), 1.55 (h,  $J$  = 6.8, 6.4 Hz, 2H), 1.46 (s, 9H).

**<sup>13</sup>C NMR** (101 MHz, CDCl<sub>3</sub>)  $\delta$  158.03, 155.94, 153.48 (dd,  $J$  = 290.1, 288.1 Hz), 136.90, 129.36, 128.61, 128.01, 127.46, 125.72, 114.92, 91.13 (dd,  $J$  = 20.5, 14.4 Hz), 79.17, 70.06, 39.85, 28.40, 28.06, 25.00.

**<sup>19</sup>F NMR** (376 MHz, CDCl<sub>3</sub>)  $\delta$  = -91.99 (d,  $J$  = 45.9 Hz, 1F), -92.14 (d,  $J$  = 45.9 Hz, 1F).

**HRMS** (ESI)  $m/z$  calcd. for C<sub>23</sub>H<sub>28</sub>F<sub>2</sub>NO<sub>3</sub> [M+H]<sup>+</sup> : 404.2032, found: 404.2040.

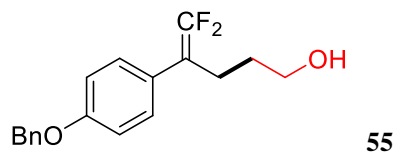

Purification by column chromatography on silica gel (hexane/ethyl acetate = 10/1, v/v) afforded **55** as a white solid (30.4 mg, 50% yield).

**<sup>1</sup>H NMR** (400 MHz, Chloroform-*d*)  $\delta$  7.37 (dt,  $J$  = 14.7, 7.3 Hz, 4H), 7.31 (d,  $J$  = 6.9 Hz, 1H), 7.21 (d,  $J$  = 8.8 Hz, 2H), 6.93 (d,  $J$  = 8.6 Hz, 2H), 5.03 (s, 2H), 3.58 (t,  $J$  = 6.4 Hz, 2H), 2.43 (t,  $J$  = 7.4 Hz, 2H), 1.59 (p,  $J$  = 6.6 Hz, 2H), 1.52 (s, 1H).

**<sup>13</sup>C NMR** (101 MHz, CDCl<sub>3</sub>)  $\delta$  157.96, 153.47 (dd,  $J$  = 289.7, 286.2, Hz), 136.86, 129.34 (t,  $J$  = 3.3 Hz), 128.60, 128.01, 127.46, 125.85, 114.87, 91.26 (dd,  $J$  = 20.9, 14.7 Hz), 70.04, 61.95, 30.66, 24.02.

**<sup>19</sup>F NMR** (376 MHz, Chloroform-*d*)  $\delta$  -92.13 (d,  $J = 45.8$  Hz, 1F), -92.29 (d,  $J = 45.8$  Hz, 1F).

**HRMS** (ESI)  $m/z$  calcd. for C<sub>18</sub>H<sub>19</sub>F<sub>2</sub>O<sub>2</sub> [M+H]<sup>+</sup> : 305.1348, found: 305.1345.

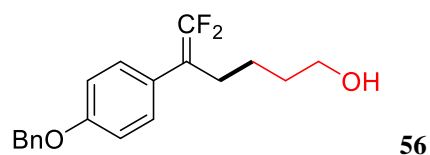

Purification by column chromatography on silica gel (hexane/ethyl acetate = 10/1, v/v) afforded **56** as a white solid (38.2 mg, 60% yield).

**<sup>1</sup>H NMR** (400 MHz, Chloroform-*d*)  $\delta$  7.41 (dt,  $J = 14.5, 7.3$  Hz, 4H), 7.36 – 7.30 (m, 1H), 7.23 (d,  $J = 8.6$  Hz, 2H), 6.96 (d,  $J = 8.7$  Hz, 2H), 5.06 (s, 2H), 3.59 (t,  $J = 6.5$  Hz, 2H), 2.44 – 2.35 (m, 2H), 1.56 (p,  $J = 6.5$  Hz, 2H), 1.42 (p,  $J = 7.4$  Hz, 2H).

**<sup>13</sup>C NMR** (101 MHz, CDCl<sub>3</sub>)  $\delta$  157.94, 153.52 (dd,  $J = 288.5, 287.0$  Hz), 136.90, 129.36 (t,  $J = 3.2$  Hz), 128.60, 128.01, 127.48, 125.99, 114.83, 91.59 (dd,  $J = 19.7, 15.3$  Hz), 70.05, 62.58, 31.99, 27.45, 23.91.

**<sup>19</sup>F NMR** (376 MHz, Chloroform-*d*)  $\delta$  -92.53, 2F.

**HRMS** (ESI)  $m/z$  calcd. for C<sub>19</sub>H<sub>21</sub>F<sub>2</sub>O<sub>2</sub> [M+H]<sup>+</sup> : 319.1504, found: 319.1500.

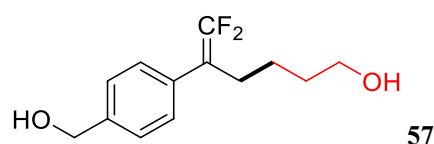

Purification by column chromatography on silica gel (hexane/ethyl acetate = 2/1, v/v) afforded **57** as a colorless oil (22.3 mg, 46% yield).

**<sup>1</sup>H NMR** (600 MHz, Chloroform-*d*)  $\delta$  7.35 (d,  $J = 8.0$  Hz, 2H), 7.29 (d,  $J = 8.0$  Hz, 2H), 4.67 (s, 2H), 3.58 (t,  $J = 6.5$  Hz, 2H), 2.43 (tt,  $J = 7.5, 2.4$  Hz, 2H), 1.55 (dt,  $J = 15.3, 6.7$  Hz, 2H), 1.42 (p,  $J = 7.6$  Hz, 2H).

**<sup>13</sup>C NMR** (151 MHz, Chloroform-*d*)  $\delta$  153.65 (dd,  $J = 289.6, 287.5$  Hz), 139.93, 132.93 (d,  $J = 2.7$  Hz), 128.43 (t,  $J = 3.3$  Hz), 127.11, 91.93 (dd,  $J = 19.8, 15.1$  Hz), 64.94, 62.53, 31.95, 27.34, 23.91.

**<sup>19</sup>F NMR** (565 MHz, Chloroform-*d*)  $\delta$  -91.49 (d,  $J = 44.1$  Hz, 1F), -91.58 (d,  $J = 44.0$  Hz, 1F)

**HRMS** (ESI)  $m/z$  calcd. for C<sub>13</sub>H<sub>17</sub>F<sub>2</sub>O<sub>2</sub> [M+H]<sup>+</sup> : 243.1191, found: 243.1194.

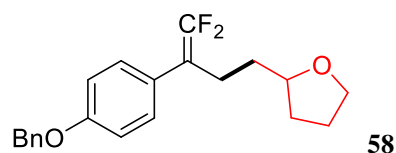

Purification by column chromatography on silica gel (hexane/ethyl acetate = 50/1, v/v) afforded **58** as a white solid (40.6 mg, 59% yield).

**<sup>1</sup>H NMR** (400 MHz, Chloroform-*d*)  $\delta$  7.48 – 7.39 (m, 4H), 7.36 (d,  $J = 7.0$  Hz, 1H), 7.27 (d,  $J = 8.5$  Hz, 2H), 6.99 (d,  $J = 8.8$  Hz, 2H), 5.09 (s, 2H), 3.84 (ddt,  $J = 21.4, 13.6, 7.2$  Hz, 2H), 3.73 (q,  $J = 7.6$  Hz, 1H), 2.59 – 2.39 (m, 2H), 2.03 – 1.93 (m, 1H), 1.92 – 1.81 (m, 2H), 1.69 – 1.60 (m, 1H), 1.59 – 1.49 (m, 1H), 1.47 – 1.38 (m, 1H).



$^{13}\text{C}$  NMR (101 MHz,  $\text{CDCl}_3$ )  $\delta$  157.92, 153.38 (dd,  $J = 288.1, 287.0$  Hz), 136.94, 129.37 (t,  $J = 3.4$  Hz), 128.59, 127.99, 127.46, 126.02, 114.84, 91.63 (dd,  $J = 19.0, 16.0$  Hz), 78.57, 70.05, 67.63, 33.81 (t,  $J = 2.4$  Hz), 31.22, 25.68, 24.72.

$^{19}\text{F}$  NMR (376 MHz, Chloroform-*d*)  $\delta$  -92.22 (d,  $J = 45.8$  Hz, 1F), -92.38 (d,  $J = 45.8$  Hz, 1F).

HRMS (ESI)  $m/z$  calcd. for  $\text{C}_{21}\text{H}_{23}\text{F}_2\text{O}_2$   $[\text{M}+\text{H}]^+$  : 345.1661, found: 345.1660.

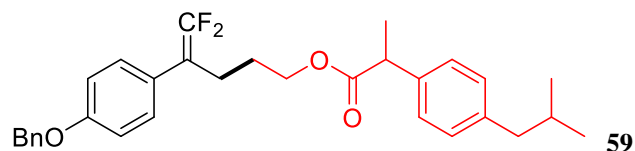

Purification by column chromatography on silica gel (hexane/ethyl acetate = 20/1, v/v) afforded **59** as a colorless oil (44.3 mg, 45% yield).

$^1\text{H}$  NMR (400 MHz,  $\text{CDCl}_3$ )  $\delta$  = 7.47 – 7.38 (m, 4H), 7.35 (d,  $J = 7.1$ , 1H), 7.20 (dd,  $J = 15.9, 8.2$ , 4H), 7.11 (d,  $J = 8.0$ , 2H), 6.96 (d,  $J = 8.7$ , 2H), 5.07 (s, 2H), 4.04 (t,  $J = 6.2$ , 2H), 3.70 (q,  $J = 7.2$ , 1H), 2.46 (d,  $J = 7.2$ , 2H), 2.35 (t,  $J = 7.4$ , 2H), 1.85 (dp,  $J = 13.5, 6.7$ , 1H), 1.69 – 1.60 (m, 2H), 1.50 (d,  $J = 7.2$ , 3H), 0.90 (d,  $J = 6.6$ , 6H).

$^{13}\text{C}$  NMR (101 MHz,  $\text{CDCl}_3$ )  $\delta$  = 174.68, 157.99, 153.48 (dd,  $J = 289.3, 287.3$  Hz), 140.52, 137.77, 136.87, 129.32, 129.30 (t,  $J = 3.4$  Hz), 128.62, 128.03, 127.47, 127.16, 125.56, 114.87, 90.87 (dd,  $J = 20.4, 15.0$  Hz), 70.04, 63.60, 45.19, 45.05, 30.18, 26.72, 24.05, 22.37, 18.38.

$^{19}\text{F}$  NMR (376 MHz,  $\text{CDCl}_3$ )  $\delta$  = -91.77 (d,  $J = 44.7$  Hz, 1F), -91.92 (d,  $J = 44.7$  Hz, 1F).

HRMS (ESI)  $m/z$  calcd. for  $\text{C}_{31}\text{H}_{35}\text{F}_2\text{O}_3$   $[\text{M}+\text{H}]^+$  : 493.2549, found: 493.2548.

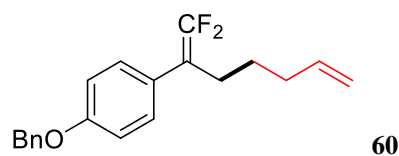

Purification by column chromatography on silica gel (hexane/ethyl acetate = 50/1, v/v) afforded **60** as a white solid (39.6 mg, 63% yield).

$^1\text{H}$  NMR (400 MHz, Chloroform-*d*)  $\delta$  7.44 (dt,  $J = 14.6, 7.3$  Hz, 4H), 7.36 (dd,  $J = 8.5, 5.6$  Hz, 1H), 7.26 (d,  $J = 8.6$  Hz, 2H), 7.00 (d,  $J = 8.7$  Hz, 2H), 5.80 (ddt,  $J = 16.9, 10.2, 6.7$  Hz, 1H), 5.09 (s, 2H), 5.07 – 4.94 (m, 2H), 2.45 – 2.36 (m, 2H), 2.08 (q,  $J = 7.1$  Hz, 2H), 1.49 (p,  $J = 7.5$  Hz, 2H).

$^{13}\text{C}$  NMR (101 MHz,  $\text{CDCl}_3$ )  $\delta$  157.95, 153.51 (dd,  $J = 289.6, 285.3$  Hz), 138.14, 136.96, 129.38 (t,  $J = 3.3$  Hz), 128.60, 128.00, 127.47, 126.17, 114.86, 114.84, 91.66 (dd,  $J = 20.2, 15.0$  Hz), 70.08, 33.05, 27.18, 26.96.

$^{19}\text{F}$  NMR (376 MHz, Chloroform-*d*)  $\delta$  -92.51, 2F.

HRMS (ESI)  $m/z$  calcd. for  $\text{C}_{20}\text{H}_{21}\text{F}_2\text{O}$   $[\text{M}+\text{H}]^+$  : 315.1555, found: 315.1550.

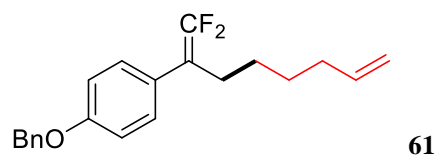

Purification by column chromatography on silica gel (hexane/ethyl acetate = 50/1, v/v) afforded **61** as a white solid (42.0 mg, 64% yield).

**<sup>1</sup>H NMR** (400 MHz, Chloroform-*d*)  $\delta$  7.46 – 7.40 (m, 4H), 7.36 (t, *J* = 7.1 Hz, 1H), 7.25 (d, *J* = 6.6 Hz, 2H), 6.99 (d, *J* = 8.8 Hz, 2H), 5.79 (ddt, *J* = 16.9, 10.2, 6.7 Hz, 1H), 5.09 (s, 2H), 5.04 – 4.90 (m, 2H), 2.43 – 2.33 (m, 2H), 2.04 (d, *J* = 6.7 Hz, 2H), 1.48 – 1.32 (m, 4H).

**<sup>13</sup>C NMR** (101 MHz, CDCl<sub>3</sub>)  $\delta$  157.89, 153.49 (t, *J* = 287.8 Hz), 138.69, 136.94, 129.36 (t, *J* = 3.3 Hz), 128.61, 128.01, 127.49, 126.21, 114.78, 114.46, 91.74 (dd, *J* = 19.1, 15.8 Hz), 70.05, 33.39, 28.24, 27.53, 27.15.

**<sup>19</sup>F NMR** (376 MHz, Chloroform-*d*)  $\delta$  -92.69 (d, *J* = 1.2 Hz, 2F).

**HRMS** (ESI) *m/z* calcd. for C<sub>21</sub>H<sub>23</sub>F<sub>2</sub>O [M+H]<sup>+</sup> : 329.1711, found: 329.1711.

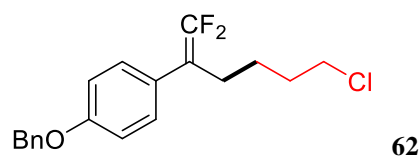

Purification by column chromatography on silica gel (hexane/ethyl acetate = 50/1, v/v) afforded **62** as a white solid (40.3 mg, 60% yield).

**<sup>1</sup>H NMR** (400 MHz, Chloroform-*d*)  $\delta$  7.48 – 7.41 (m, 4H), 7.40 – 7.35 (m, 1H), 7.26 (d, *J* = 8.2 Hz, 2H), 7.03 – 6.99 (m, 2H), 5.10 (s, 2H), 3.52 (t, *J* = 6.7 Hz, 2H), 2.44 (tt, *J* = 7.5, 2.3 Hz, 2H), 1.85 – 1.75 (m, 2H), 1.56 (dt, *J* = 10.2, 6.5 Hz, 2H).

**<sup>13</sup>C NMR** (101 MHz, CDCl<sub>3</sub>)  $\delta$  158.04, 153.58 (dd, *J* = 289.3, 286.5 Hz), 136.92, 129.37 (t, *J* = 3.2 Hz), 128.63, 128.03, 127.50, 125.80, 114.92, 91.37 (dd, *J* = 21.0, 14.2 Hz), 70.08, 44.57, 31.81, 26.97, 24.96.

**<sup>19</sup>F NMR** (376 MHz, Chloroform-*d*)  $\delta$  -92.13 (d, *J* = 45.9 Hz, 1F), -92.31 (d, *J* = 46.0 Hz, 1F).

**HRMS** (ESI) *m/z* calcd. for C<sub>19</sub>H<sub>20</sub>ClF<sub>2</sub>O [M+H]<sup>+</sup> : 337.1165, found: 337.1172.

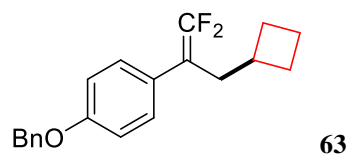

Purification by column chromatography on silica gel (hexane/ethyl acetate = 50/1, v/v) afforded **63** as a white solid (38.3 mg, 61% yield).

**<sup>1</sup>H NMR** (400 MHz, Chloroform-*d*)  $\delta$  7.49 – 7.37 (m, 5H), 7.24 (d, *J* = 8.5 Hz, 2H), 6.99 (d, *J* = 8.7 Hz, 2H), 5.10 (s, 2H), 2.48 (dt, *J* = 7.6, 2.2 Hz, 2H), 2.33 (dt, *J* = 15.5, 7.8 Hz, 1H), 2.02 – 1.93 (m, 2H), 1.86 – 1.78 (m, 2H), 1.72 – 1.61 (m, 2H).

**<sup>13</sup>C NMR** (101 MHz, CDCl<sub>3</sub>)  $\delta$  157.92, 153.93 (dd, *J* = 288.5, 285.6 Hz), 136.98, 129.47 (t, *J* = 3.2 Hz), 128.60, 127.99, 127.48, 126.48, 114.73, 90.76 (dd, *J* = 22.1, 13.1 Hz), 70.07, 34.79, 34.32, 27.94, 18.17.

**<sup>19</sup>F NMR** (376 MHz, Chloroform-*d*)  $\delta$  -92.85 (d, *J* = 47.4 Hz, 1F), -93.15 (d, *J* = 47.4 Hz, 1F).

**HRMS** (ESI) *m/z* calcd. for C<sub>20</sub>H<sub>21</sub>F<sub>2</sub>O [M+H]<sup>+</sup> : 315.1555, found: 315.1553.

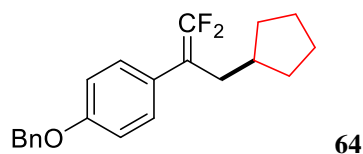

Purification by column chromatography on silica gel (hexane/ethyl acetate = 50/1, v/v) afforded **64** as a white solid (40.0 mg, 61% yield).

**<sup>1</sup>H NMR** (400 MHz, Chloroform-*d*)  $\delta$  7.49 – 7.41 (m, 4H), 7.37 (dd, *J* = 8.2, 5.9 Hz, 1H), 7.28 (d, *J* = 8.1 Hz, 2H), 7.01 (d, *J* = 8.8 Hz, 2H), 5.10 (s, 2H), 2.40 (dt, *J* = 7.4, 2.3 Hz, 2H), 1.84 (dt, *J* = 15.1, 7.5 Hz, 1H), 1.67 (dtd, *J* = 17.1, 9.5, 8.4, 4.3 Hz, 4H), 1.51 (dt, *J* = 7.6, 3.7 Hz, 2H), 1.24 – 1.14 (m, 2H).

**<sup>13</sup>C NMR** (101 MHz, CDCl<sub>3</sub>)  $\delta$  157.91, 153.81 (t, *J* = 289.9 Hz), 136.98, 129.50 (t, *J* = 3.2 Hz), 128.61, 128.00, 127.50, 126.47, 114.75, 91.77 (dd, *J* = 21.6, 13.3 Hz), 70.06, 38.25, 33.70, 32.15, 25.00.

**<sup>19</sup>F NMR** (376 MHz, Chloroform-*d*)  $\delta$  -92.93 (d, *J* = 47.5 Hz, 1F), -93.24 (d, *J* = 47.5 Hz, 1F).

**HRMS** (ESI) *m/z* calcd. for C<sub>21</sub>H<sub>23</sub>F<sub>2</sub>O [M+H]<sup>+</sup> : 329.1711, found: 329.1710.

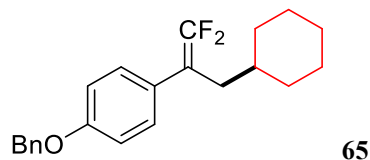

Purification by column chromatography on silica gel (hexane/ethyl acetate = 50/1, v/v) afforded **65** as a white solid (45.8 mg, 67% yield).

**<sup>1</sup>H NMR** (400 MHz, Chloroform-*d*)  $\delta$  7.50 (d, *J* = 6.9 Hz, 2H), 7.47 – 7.42 (m, 2H), 7.39 (dd, *J* = 8.3, 5.7 Hz, 1H), 7.32 – 7.26 (m, 2H), 7.05 – 6.99 (m, 2H), 5.11 (s, 2H), 2.30 (dt, *J* = 7.1, 2.3 Hz, 2H), 1.77 – 1.64 (m, 5H), 1.32 (ddq, *J* = 14.8, 7.4, 3.7, 2.9 Hz, 1H), 1.18 (s, 3H), 1.04 – 0.91 (m, 2H).

**<sup>13</sup>C NMR** (101 MHz, CDCl<sub>3</sub>)  $\delta$  157.90, 153.96 (dd, *J* = 289.0, 285.5 Hz), 137.02, 129.44 (t, *J* = 3.2 Hz), 128.64, 128.03, 127.53, 126.62, 114.79, 90.54 (dd, *J* = 22.1, 13.0 Hz), 70.08, 35.71, 35.36, 32.91, 26.48, 26.12.

**<sup>19</sup>F NMR** (376 MHz, Chloroform-*d*)  $\delta$  -92.14 (d, *J* = 46.5 Hz, 1F), -92.56 (d, *J* = 46.4 Hz, 1F).

**HRMS** (ESI) *m/z* calcd. for C<sub>22</sub>H<sub>25</sub>F<sub>2</sub>O [M+H]<sup>+</sup> : 343.1868, found: 343.1875.

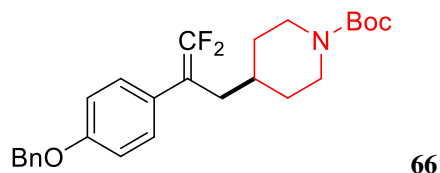

Purification by column chromatography on silica gel (hexane/ethyl acetate = 20/1, v/v) afforded **66** as a brown solid (73.5 mg, 83% yield).

**<sup>1</sup>H NMR** (400 MHz, Chloroform-*d*)  $\delta$  7.49 – 7.37 (m, 4H), 7.35 (d, *J* = 7.1 Hz, 1H), 7.23 (d, *J* = 8.3 Hz, 2H), 6.98 (d, *J* = 8.6 Hz, 2H), 5.07 (s, 2H), 4.04 (s, 2H), 2.59 (d, *J* = 10.4 Hz, 2H), 2.30 (d, *J* = 7.4 Hz, 2H), 1.66 – 1.56 (m, 2H), 1.45 (s, 9H), 1.43 – 1.36 (m, 1H), 1.18 – 1.04 (m, 2H).

$^{13}\text{C}$  NMR (101 MHz,  $\text{CDCl}_3$ )  $\delta$  157.99, 154.78, 153.95 (dd,  $J = 290.6, 287.1$  Hz), 136.85, 129.32 (t,  $J = 3.1$  Hz Hz), 128.61, 128.03, 127.48, 126.03, 114.88, 89.92 (dd,  $J = 21.8, 13.7$  Hz Hz), 79.26, 70.06, 43.59, 34.45, 34.21, 31.70, 28.44.

$^{19}\text{F}$  NMR (376 MHz, Chloroform-*d*)  $\delta$  -91.59 (d,  $J = 45.1$  Hz, 1F), -91.93 (d,  $J = 45.1$  Hz, 1F).

HRMS (ESI)  $m/z$  calcd. for  $\text{C}_{26}\text{H}_{32}\text{F}_2\text{NO}_3$   $[\text{M}+\text{H}]^+$  : 444.2345, found: 444.2335.

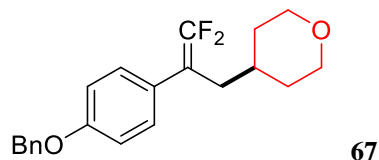

Purification by column chromatography on silica gel (hexane/ethyl acetate = 50/1, v/v) afforded **67** as a white solid (44.8 mg, 71% yield).

$^1\text{H}$  NMR (400 MHz, Chloroform-*d*)  $\delta$  7.50 – 7.39 (m, 4H), 7.37 (d,  $J = 7.1$  Hz, 1H), 7.26 (d,  $J = 8.4$  Hz, 2H), 7.00 (d,  $J = 8.7$  Hz, 2H), 5.09 (s, 2H), 3.94 (dd,  $J = 11.4, 3.8$  Hz, 2H), 3.29 (t,  $J = 11.1$  Hz, 2H), 2.34 (dd,  $J = 4.5, 2.2$  Hz, 2H), 1.62 – 1.47 (m, 3H), 1.33 (ddt,  $J = 15.0, 11.0, 5.9$  Hz, 2H).

$^{13}\text{C}$  NMR (101 MHz,  $\text{CDCl}_3$ )  $\delta$  158.02, 154.02 (dd,  $J = 289.4, 286.4$  Hz), 136.90, 129.35 (t,  $J = 3.2$  Hz), 128.62, 128.04, 127.49, 126.11, 114.91, 89.82 (dd,  $J = 21.8, 13.6$  Hz), 70.08, 67.79, 34.82, 33.23, 32.65.

$^{19}\text{F}$  NMR (376 MHz, Chloroform-*d*)  $\delta$  -91.63 (d,  $J = 45.2$  Hz, 1F), -91.93 (d,  $J = 45.3$  Hz, 1F).

HRMS (ESI)  $m/z$  calcd. for  $\text{C}_{21}\text{H}_{23}\text{F}_2\text{O}_2$   $[\text{M}+\text{H}]^+$  : 345.1661, found: 345.1670.

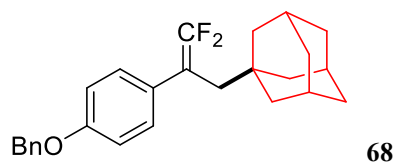

Purification by column chromatography on silica gel (hexane/ethyl acetate = 50/1, v/v) afforded **68** as a white solid (47.3 mg, 60% yield).

$^1\text{H}$  NMR (400 MHz, Chloroform-*d*)  $\delta$  7.48 (d,  $J = 7.2$  Hz, 2H), 7.43 (t,  $J = 7.3$  Hz, 2H), 7.37 (dd,  $J = 8.3, 5.6$  Hz, 1H), 7.31 – 7.26 (m, 2H), 7.01 – 6.97 (m, 2H), 5.09 (s, 2H), 2.25 – 2.18 (m, 2H), 1.91 (s, 3H), 1.67 (d,  $J = 12.2$  Hz, 3H), 1.61 – 1.55 (m, 3H), 1.47 – 1.37 (m, 6H).

$^{13}\text{C}$  NMR (101 MHz,  $\text{CDCl}_3$ )  $\delta$  157.70, 154.34 (dd,  $J = 289.4, 286.9$  Hz), 137.00, 129.47 (t,  $J = 2.9$  Hz), 128.60, 128.01, 127.56, 127.47, 114.64, 89.21 (dd,  $J = 21.8, 12.8$  Hz), 70.08, 42.73, 41.99, 36.93, 34.63, 28.68.

$^{19}\text{F}$  NMR (376 MHz, Chloroform-*d*)  $\delta$  -89.88 (d,  $J = 43.2$  Hz, 1F), -92.90 (d,  $J = 43.2$  Hz, 1F).

HRMS (ESI)  $m/z$  calcd. for  $\text{C}_{26}\text{H}_{29}\text{F}_2\text{O}$   $[\text{M}+\text{H}]^+$  : 395.2181, found: 395.2183.

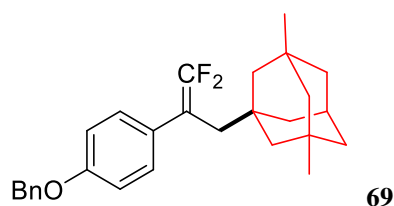

Purification by column chromatography on silica gel (hexane/ethyl acetate = 50/1, v/v) afforded **69** as a white solid (49.0 mg, 58% yield).

**<sup>1</sup>H NMR** (400 MHz, Chloroform-*d*)  $\delta$  7.48 (d,  $J$  = 7.4 Hz, 2H), 7.43 (t,  $J$  = 7.3 Hz, 2H), 7.37 (dd,  $J$  = 8.3, 5.9 Hz, 1H), 7.27 (d,  $J$  = 7.9 Hz, 2H), 6.98 (d,  $J$  = 8.7 Hz, 2H), 5.10 (s, 2H), 2.24 (t,  $J$  = 2.6 Hz, 2H), 2.02 – 1.93 (m, 1H), 1.23 (d,  $J$  = 21.1 Hz, 6H), 1.11 (d,  $J$  = 12.0 Hz, 3H), 1.03 (d,  $J$  = 12.2 Hz, 3H), 0.78 (s, 6H).

**<sup>13</sup>C NMR** (101 MHz, CDCl<sub>3</sub>)  $\delta$  157.67, 154.30 (dd,  $J$  = 289.5, 286.6 Hz), 136.99, 129.44 (t,  $J$  = 3.0 Hz), 128.33 (dd,  $J$  = 4.6, 2.9 Hz), 128.29, 127.97, 127.51, 114.66, 89.28 (dd,  $J$  = 21.9, 13.1 Hz), 70.06, 51.12, 49.08, 43.15, 41.35, 41.17, 36.31, 36.29, 36.26, 31.22, 30.64, 29.73.

**<sup>19</sup>F NMR** (376 MHz, Chloroform-*d*)  $\delta$  -89.80 (d,  $J$  = 43.3 Hz, 1F), -92.78 (d,  $J$  = 43.3 Hz, 1F).

**HRMS** (ESI)  $m/z$  calcd. for C<sub>28</sub>H<sub>33</sub>F<sub>2</sub>O [M+H]<sup>+</sup> : 423.2494, found: 423.2498.

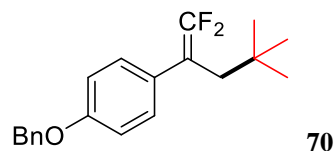

Purification by column chromatography on silica gel (hexane/ethyl acetate = 50/1, v/v) afforded **70** as a white solid (39.8 mg, 63% yield).

**<sup>1</sup>H NMR** (400 MHz, Chloroform-*d*)  $\delta$  7.50 – 7.45 (m, 2H), 7.42 (t,  $J$  = 7.3 Hz, 2H), 7.36 (dd,  $J$  = 8.4, 5.8 Hz, 1H), 7.27 (dd,  $J$  = 8.7, 1.2 Hz, 2H), 6.99 (d,  $J$  = 8.8 Hz, 2H), 5.08 (s, 2H), 2.34 (t,  $J$  = 2.4 Hz, 2H), 0.85 (s, 9H).

**<sup>13</sup>C NMR** (101 MHz, CDCl<sub>3</sub>)  $\delta$  157.78, 154.35 (dd,  $J$  = 289.2, 286.9 Hz), 136.97, 129.55 (t,  $J$  = 2.9 Hz), 128.05 (dd,  $J$  = 4.7, 3.2 Hz), 128.01, 127.98, 127.52, 114.68, 90.56 (dd,  $J$  = 21.5, 13.1 Hz), 70.08, 41.23, 32.66, 29.77.

**<sup>19</sup>F NMR** (376 MHz, Chloroform-*d*)  $\delta$  -90.64 (d,  $J$  = 43.3 Hz, 1F), -93.17 (d,  $J$  = 43.2 Hz, 1F).

**HRMS** (ESI)  $m/z$  calcd. for C<sub>20</sub>H<sub>23</sub>F<sub>2</sub>O [M+H]<sup>+</sup> : 317.1711, found: 317.1716.

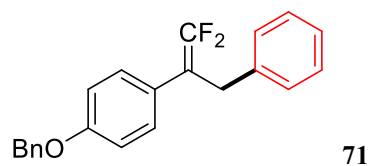

Purification by column chromatography on silica gel (hexane/ethyl acetate = 50/1, v/v) afforded **71** as a white solid (37.0 mg, 55% yield)

**<sup>1</sup>H NMR** (400 MHz, Chloroform-*d*)  $\delta$  = 7.39 (q,  $J$  = 7.9 Hz, 4H), 7.34 (d,  $J$  = 6.9 Hz, 1H), 7.25 (d,  $J$  = 7.3 Hz, 2H), 7.18 (t,  $J$  = 9.3 Hz, 5H), 6.90 (d,  $J$  = 8.5 Hz, 2H), 5.02 (s, 2H), 3.71 (s, 2H).

**<sup>13</sup>C NMR** (101 MHz, CDCl<sub>3</sub>)  $\delta$  = 157.92, 154.30 (dd,  $J$  = 290.9, 288.1 Hz), 138.57 (t,  $J$  = 2.7 Hz), 136.87, 129.42 (t,  $J$  = 3.5 Hz), 128.58, 128.46, 128.28, 127.99, 127.46, 126.35, 125.98 (t,  $J$  = 3.6 Hz), 114.73, 91.13 (dd,  $J$  = 21.3, 13.9 Hz), 69.99, 33.99.

**<sup>19</sup>F NMR** (376 MHz, Chloroform-*d*)  $\delta$  = -91.32 (dd,  $J$  = 42.4 Hz, 3.8 Hz, 1F), -91.75 (dd,  $J$  = 42.4 Hz, 3.8 Hz, 1F).

**HRMS** (ESI)  $m/z$  calcd. for C<sub>22</sub>H<sub>19</sub>F<sub>2</sub>O [M+H]<sup>+</sup> : 337.1398, found: 337.1398.

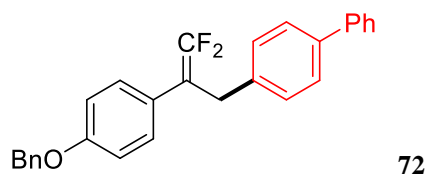

Purification by column chromatography on silica gel (hexane/ethyl acetate = 50/1, v/v) afforded **72** as a white solid (42.0 mg, 51% yield).

**<sup>1</sup>H NMR** (400 MHz, Chloroform-*d*)  $\delta$  = 7.58 (d,  $J$  = 7.6 Hz, 2H), 7.50 (t,  $J$  = 7.1 Hz, 2H), 7.43 (dd,  $J$  = 15.0 Hz, 8.4 Hz, 6H), 7.34 (t,  $J$  = 7.3 Hz, 2H), 7.25 (d,  $J$  = 8.4 Hz, 4H), 6.93 (d,  $J$  = 8.7 Hz, 2H), 5.05 (s, 2H), 3.77 (s, 2H).

**<sup>13</sup>C NMR** (101 MHz, CDCl<sub>3</sub>)  $\delta$  = 157.94, 154.33 (dd,  $J$  = 290.9, 287.2 Hz), 140.84, 139.29, 137.66 (t,  $J$  = 2.7 Hz), 136.86, 129.43 (t,  $J$  = 3.5 Hz), 128.71, 128.68, 128.58, 127.99, 127.46, 127.19, 127.12, 126.96, 125.94, 114.78, 91.06 (dd,  $J$  = 21.2, 14.0 Hz), 70.00, 33.64.

**<sup>19</sup>F NMR** (376 MHz, Chloroform-*d*)  $\delta$  = -91.14 (d,  $J$  = 42.2 Hz, 1F), -91.55 (d,  $J$  = 42.2 Hz, 1F).

**HRMS** (ESI)  $m/z$  calcd. for C<sub>28</sub>H<sub>23</sub>F<sub>2</sub>O [M+H]<sup>+</sup> : 413.1711, found: 413.1710.

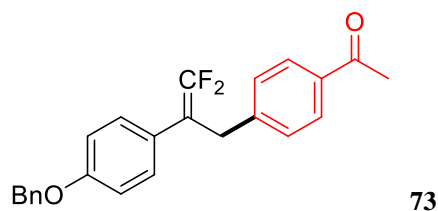

Purification by column chromatography on silica gel (hexane/ethyl acetate = 20/1, v/v) afforded **73** as a white solid (46.9 mg, 62% yield).

**<sup>1</sup>H NMR** (400 MHz, Chloroform-*d*)  $\delta$  = 7.84 (d,  $J$  = 8.1 Hz, 2H), 7.39 (t,  $J$  = 7.9 Hz, 4H), 7.34 – 7.29 (m, 1H), 7.24 (d,  $J$  = 8.0 Hz, 2H), 7.16 (d,  $J$  = 8.4 Hz, 2H), 6.89 (d,  $J$  = 8.7 Hz, 2H), 5.01 (s, 2H), 3.75 (s, 2H), 2.55 (s, 3H).

**<sup>13</sup>C NMR** (101 MHz, CDCl<sub>3</sub>)  $\delta$  = 197.70, 158.04, 154.31 (dd,  $J$  = 291.2, 287.5 Hz), 136.77, 135.57, 134.01, 129.35 (t,  $J$  = 3.5 Hz), 128.63, 128.58, 128.50, 128.02, 127.45, 125.41, 114.86, 90.63 (dd,  $J$  = 21.2, 14.6 Hz), 69.99, 33.99, 26.51.

**<sup>19</sup>F NMR** (376 MHz, Chloroform-*d*)  $\delta$  = -90.75 (d,  $J$  = 41.2 Hz, 1F), -91.09 (d,  $J$  = 41.1 Hz, 1F).

**HRMS** (ESI)  $m/z$  calcd. for C<sub>24</sub>H<sub>21</sub>F<sub>2</sub>O<sub>2</sub> [M+H]<sup>+</sup> : 379.1504, found: 379.1500.

### 3. NMR spectra for the products

#### NMR spectrum of 1

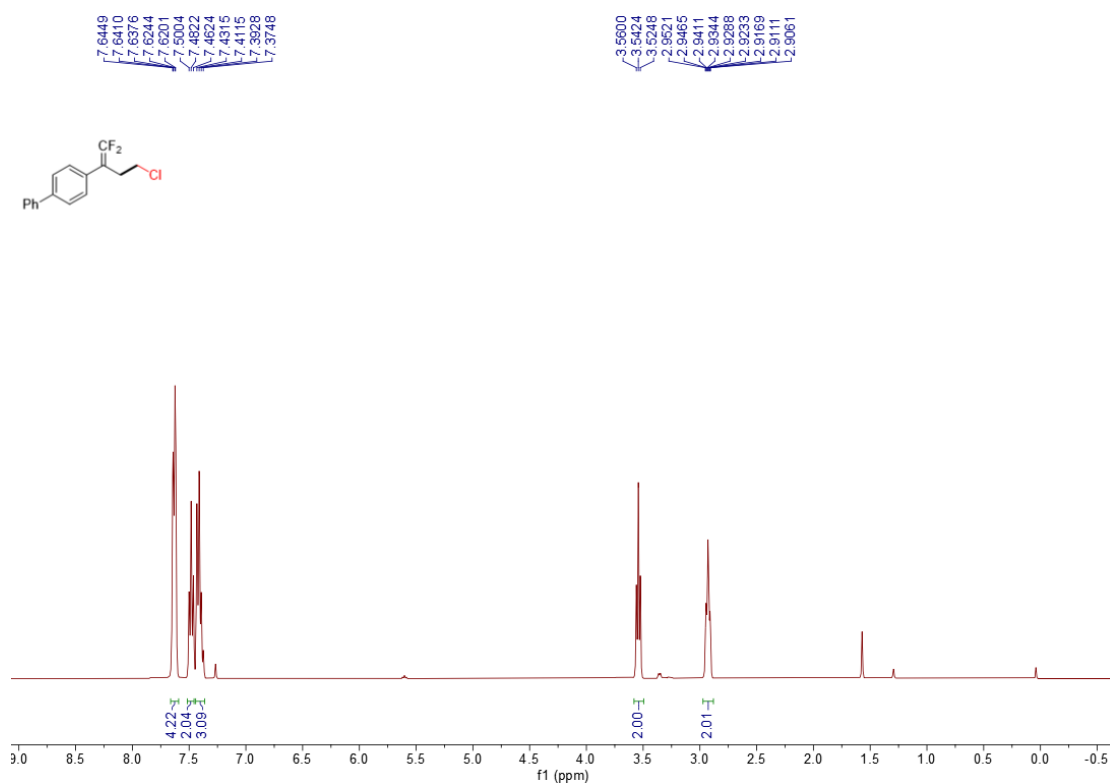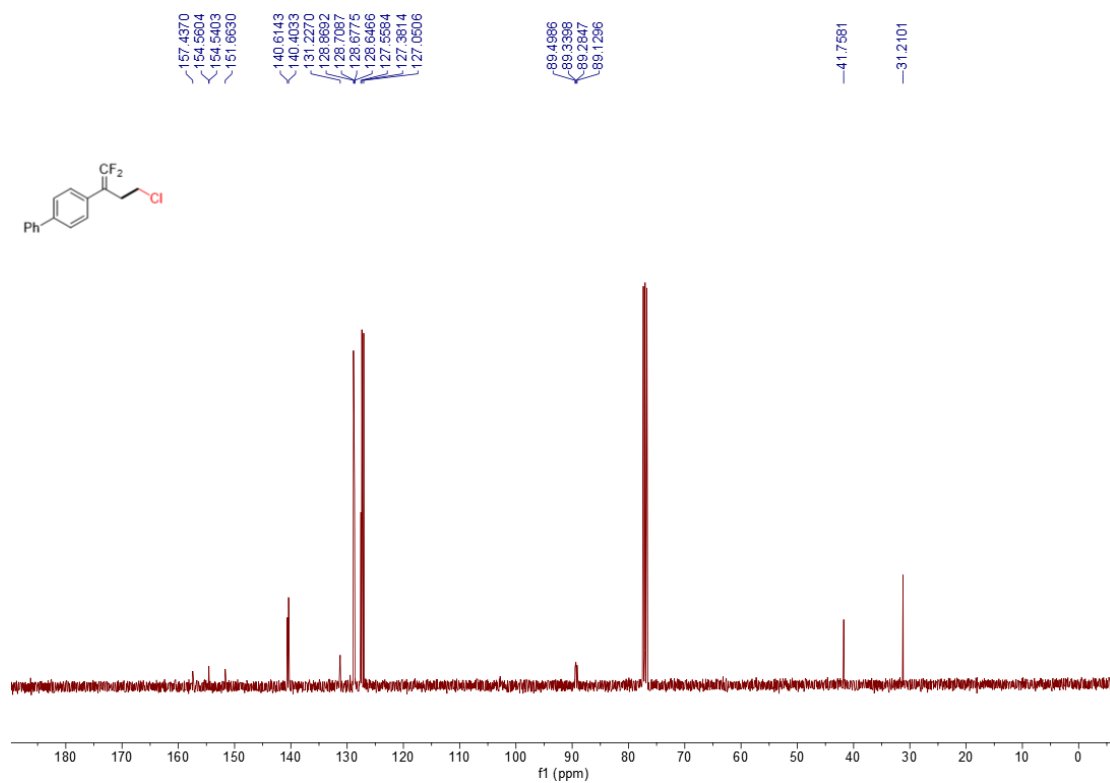

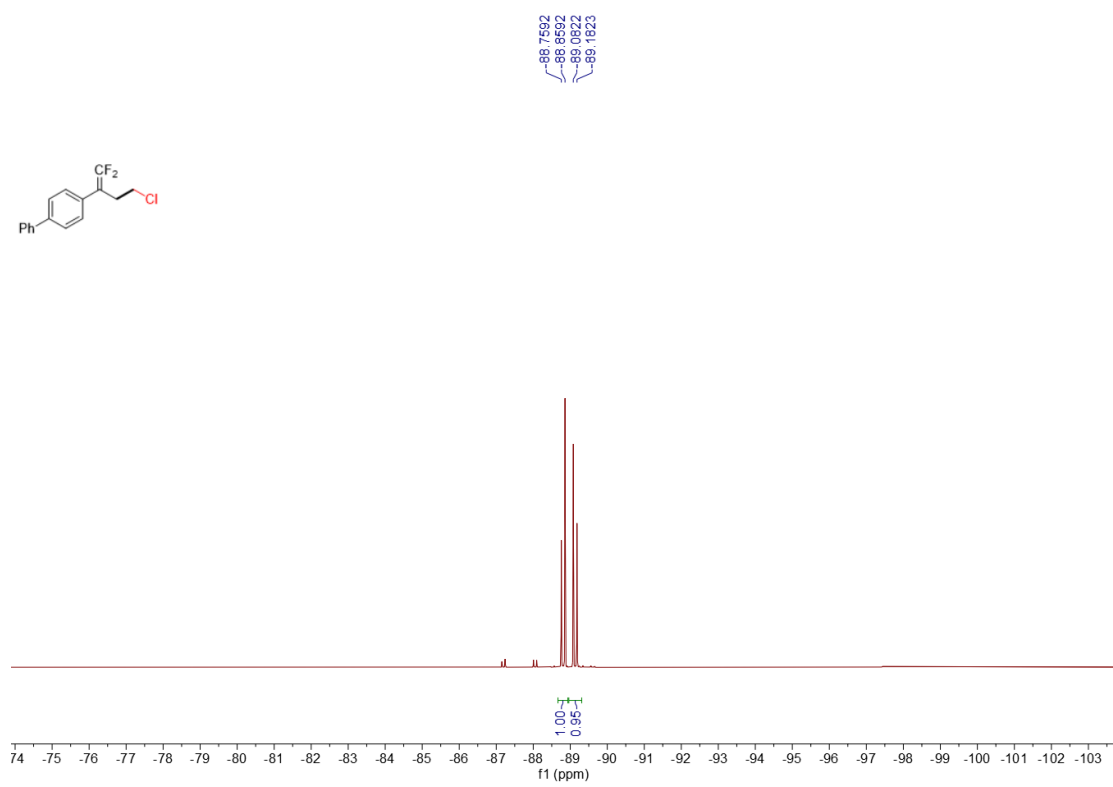

**NMR spectrum of 2**

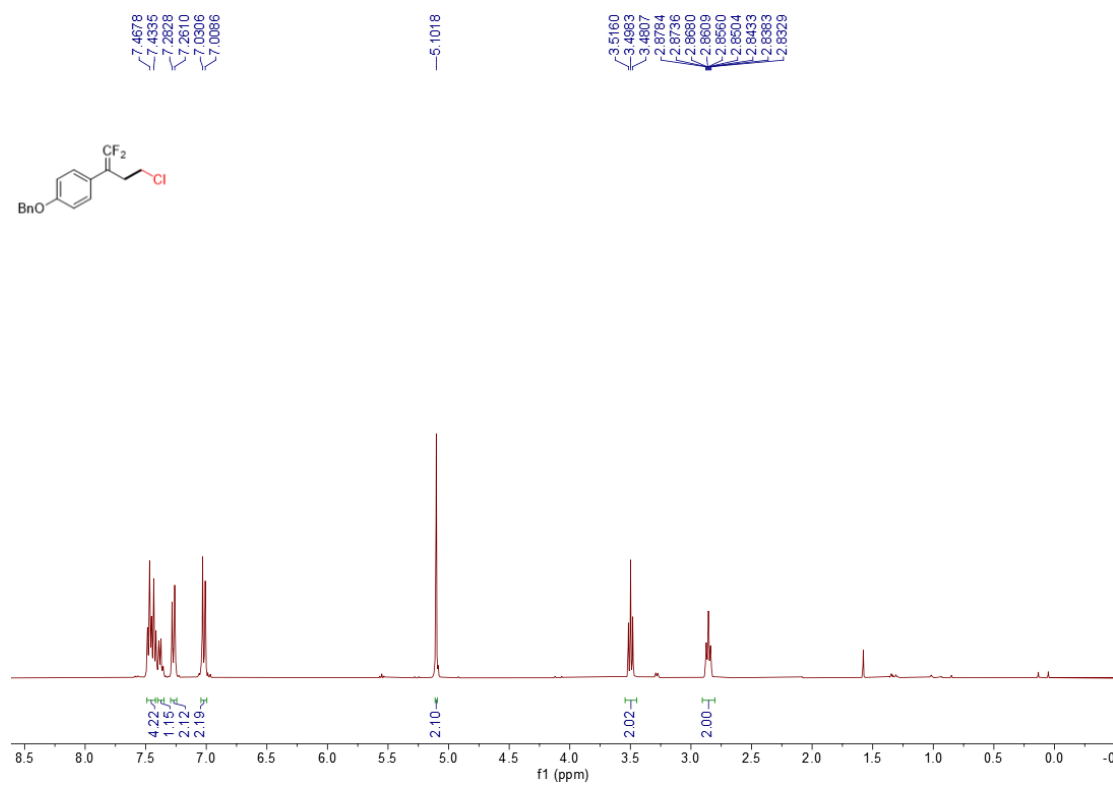



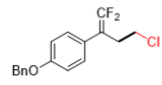

158.3113  
157.2288  
154.3618  
151.4762

136.8133  
129.5530  
129.5215  
129.4902  
128.6448  
128.0705  
127.4828  
115.0686

89.2242  
89.0590  
89.0100  
88.8480

70.0788

41.7594

31.4054

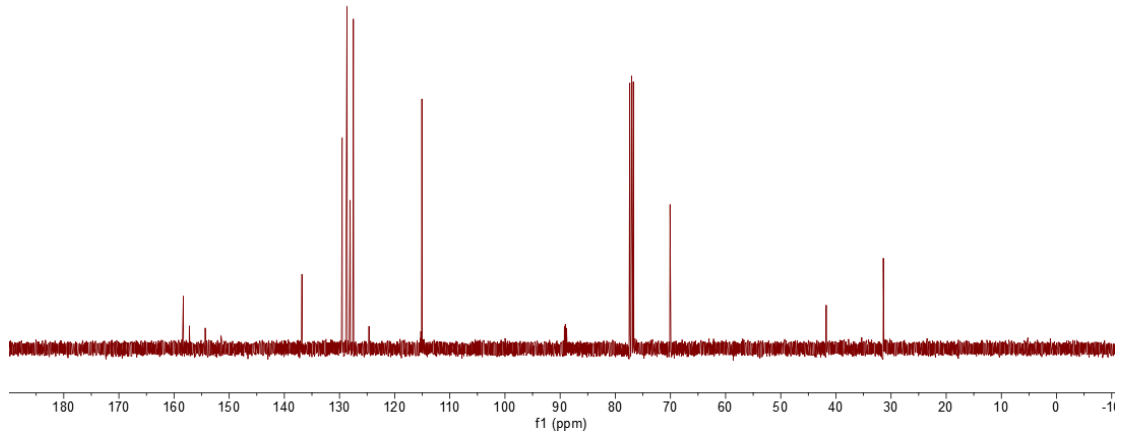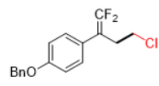

90.0569  
90.1646  
90.5188  
90.6265

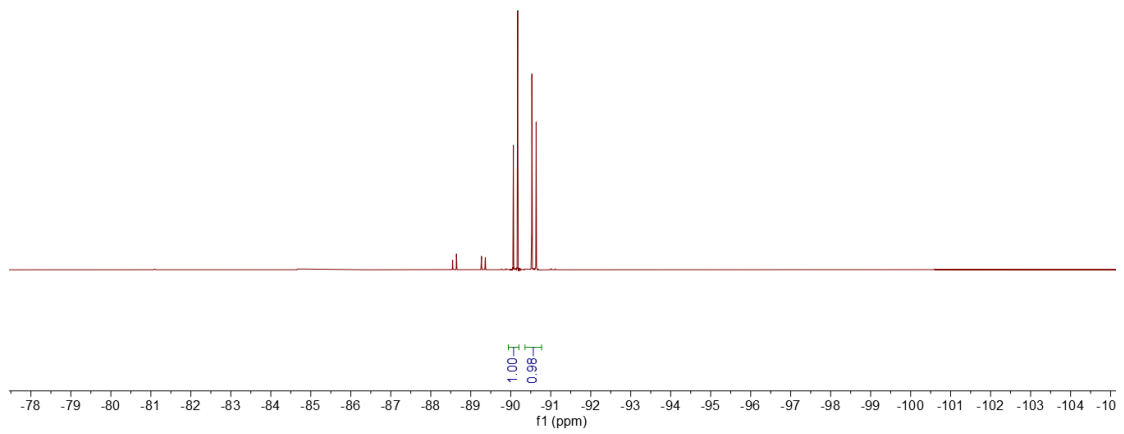

# NMR spectrum of 3

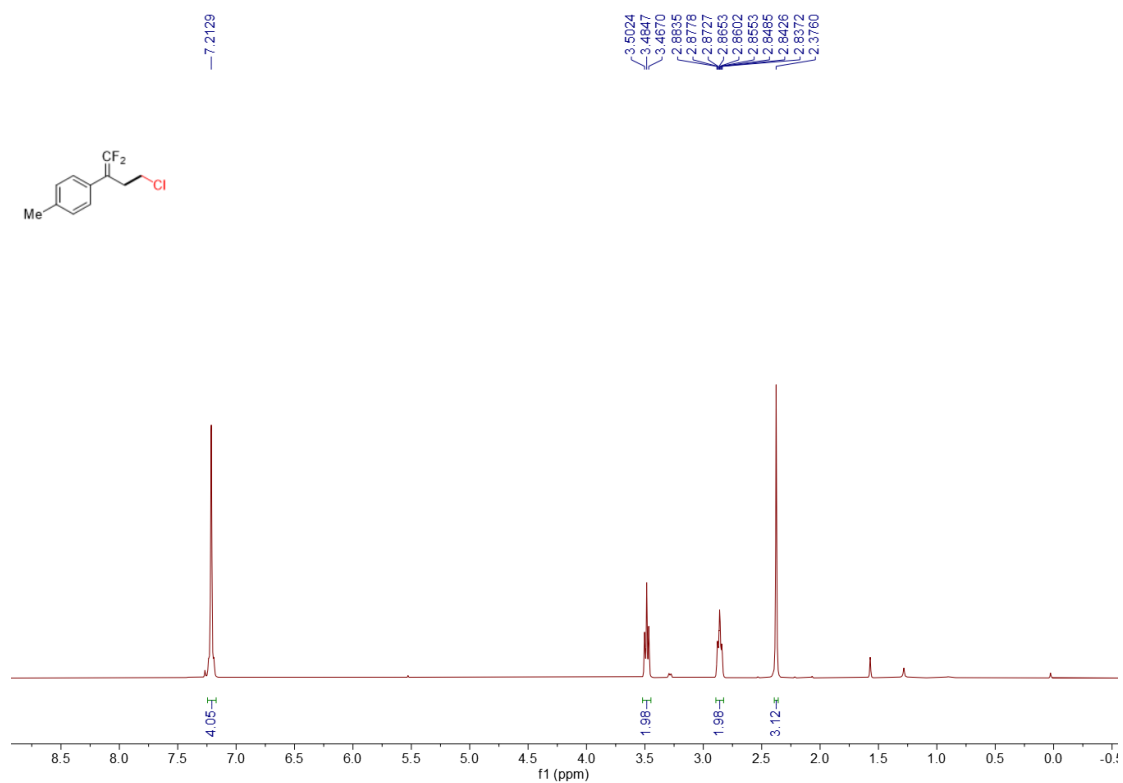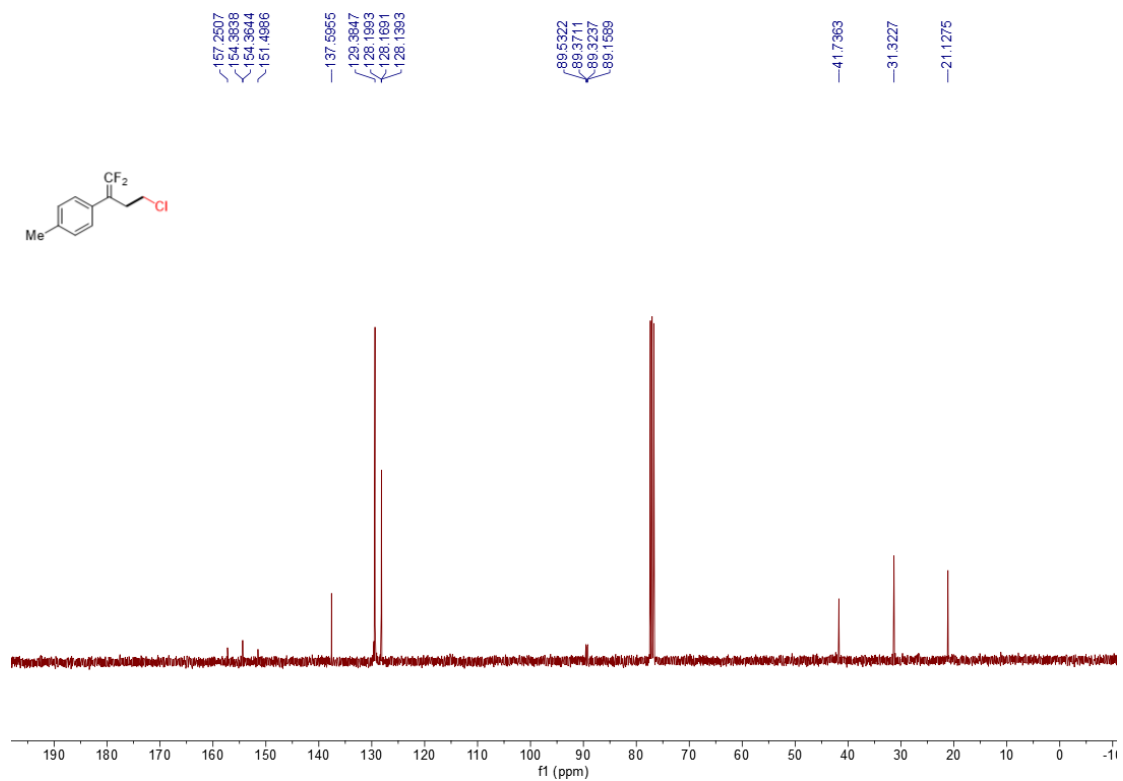

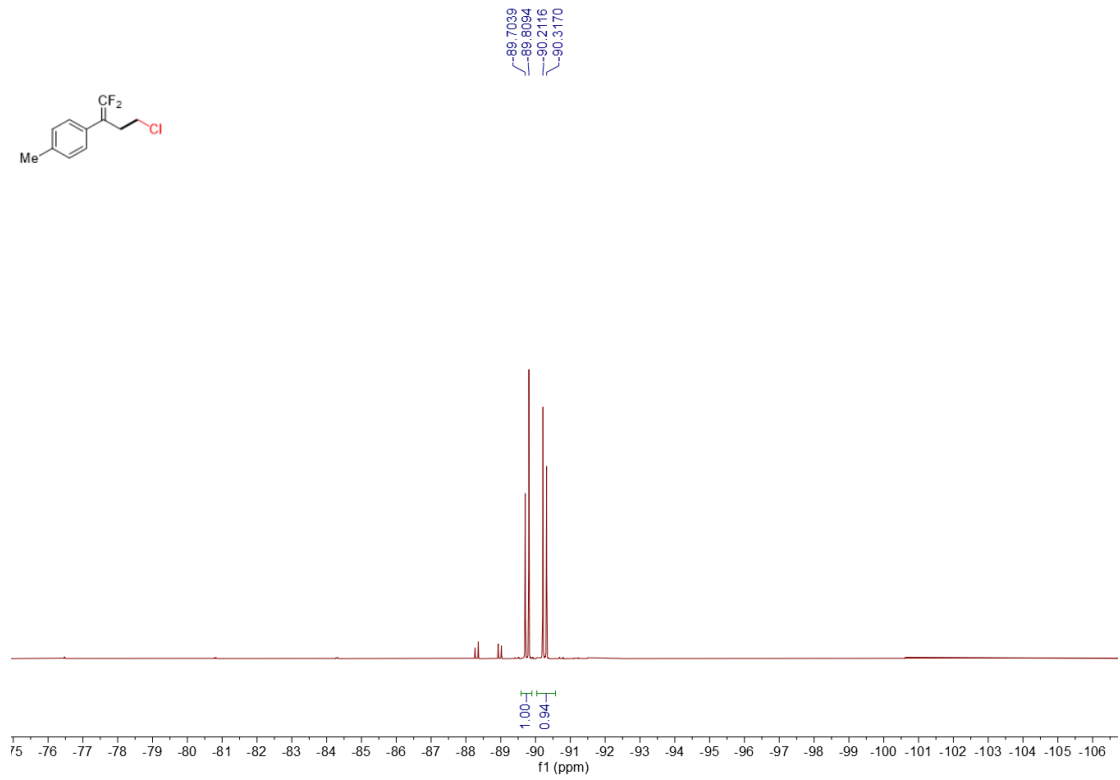

### NMR spectrum of 4

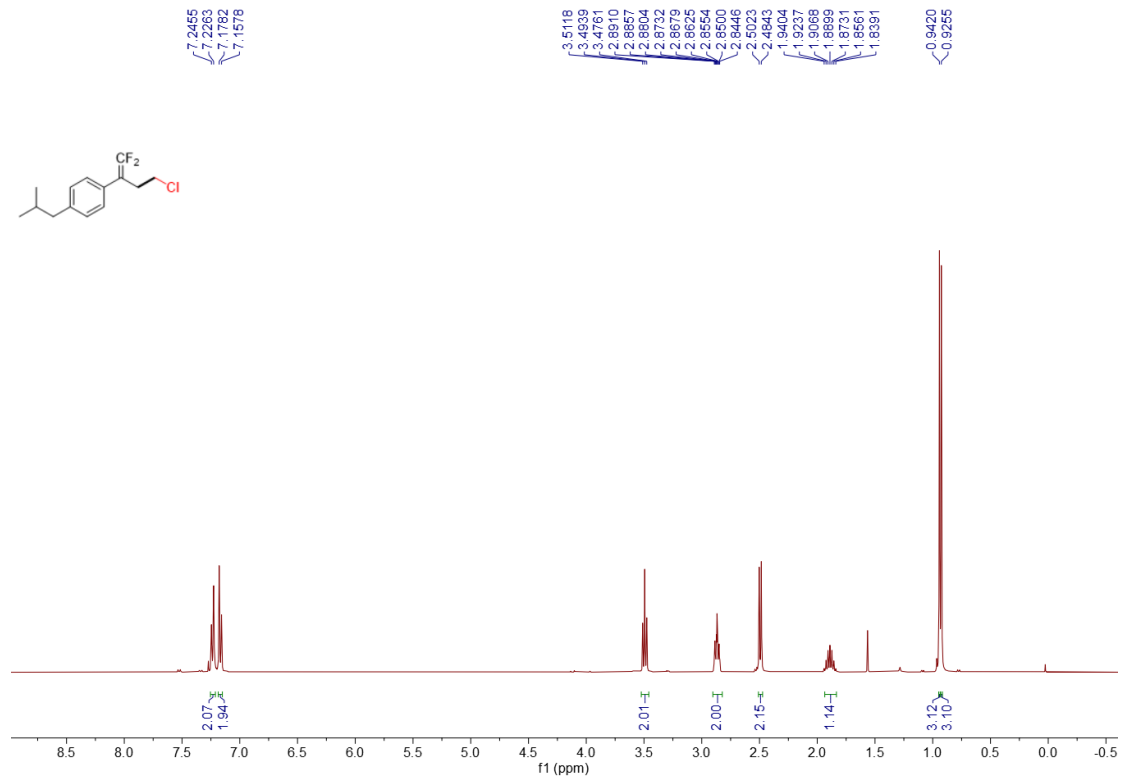

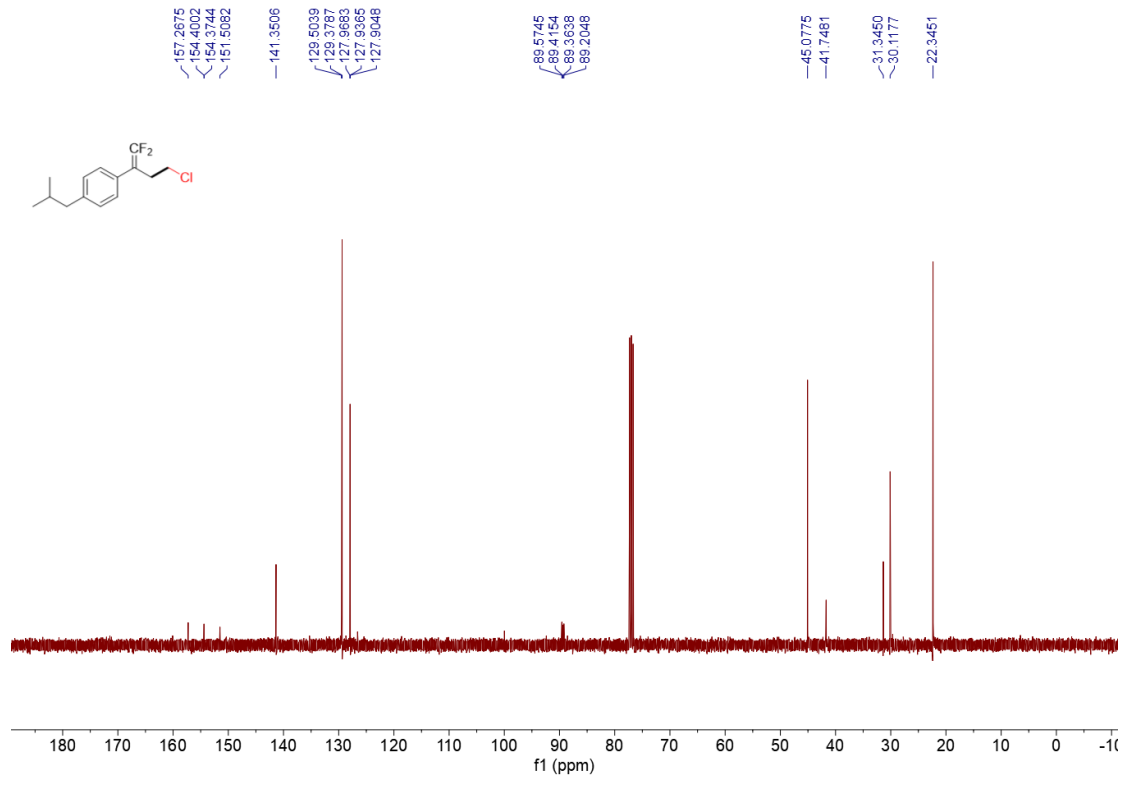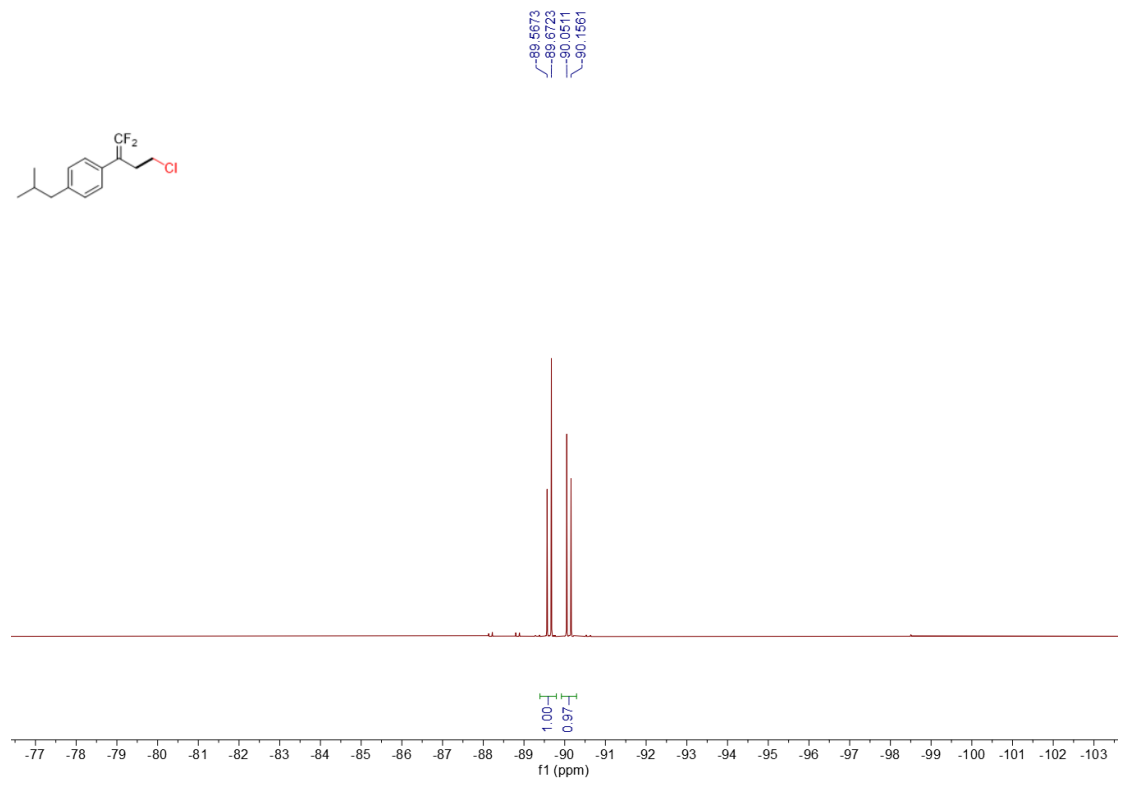

# NMR spectrum of 5

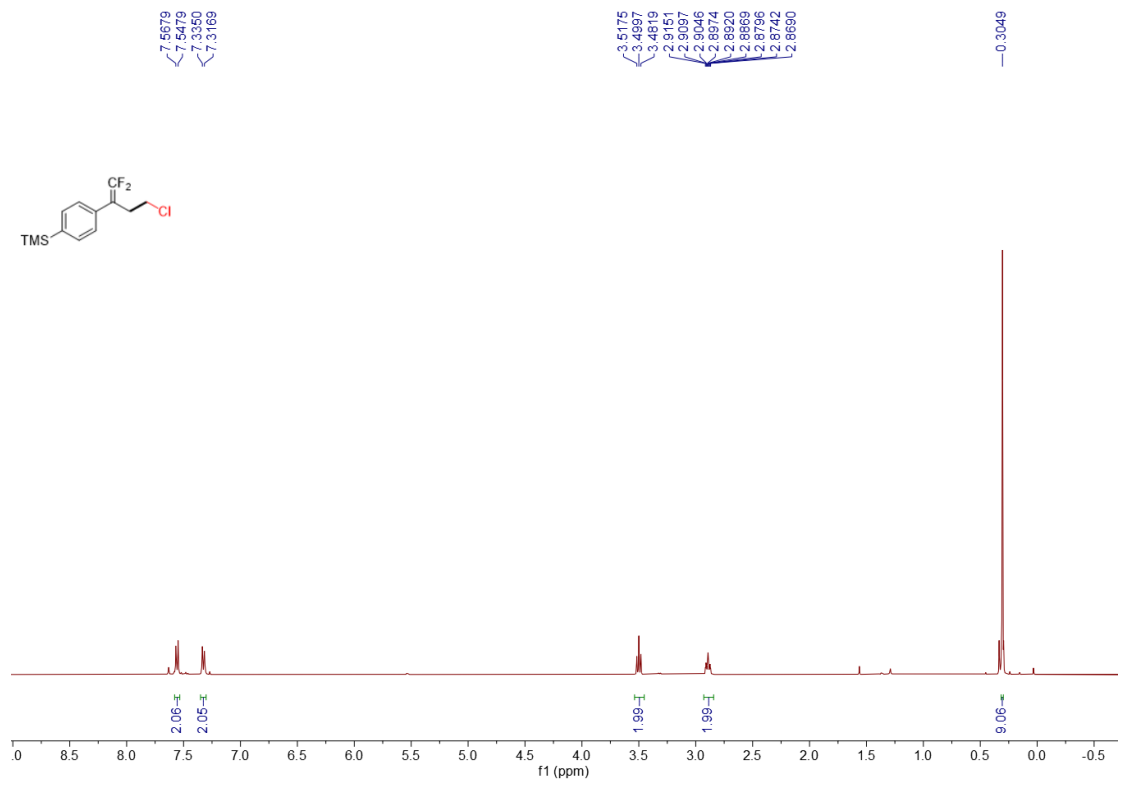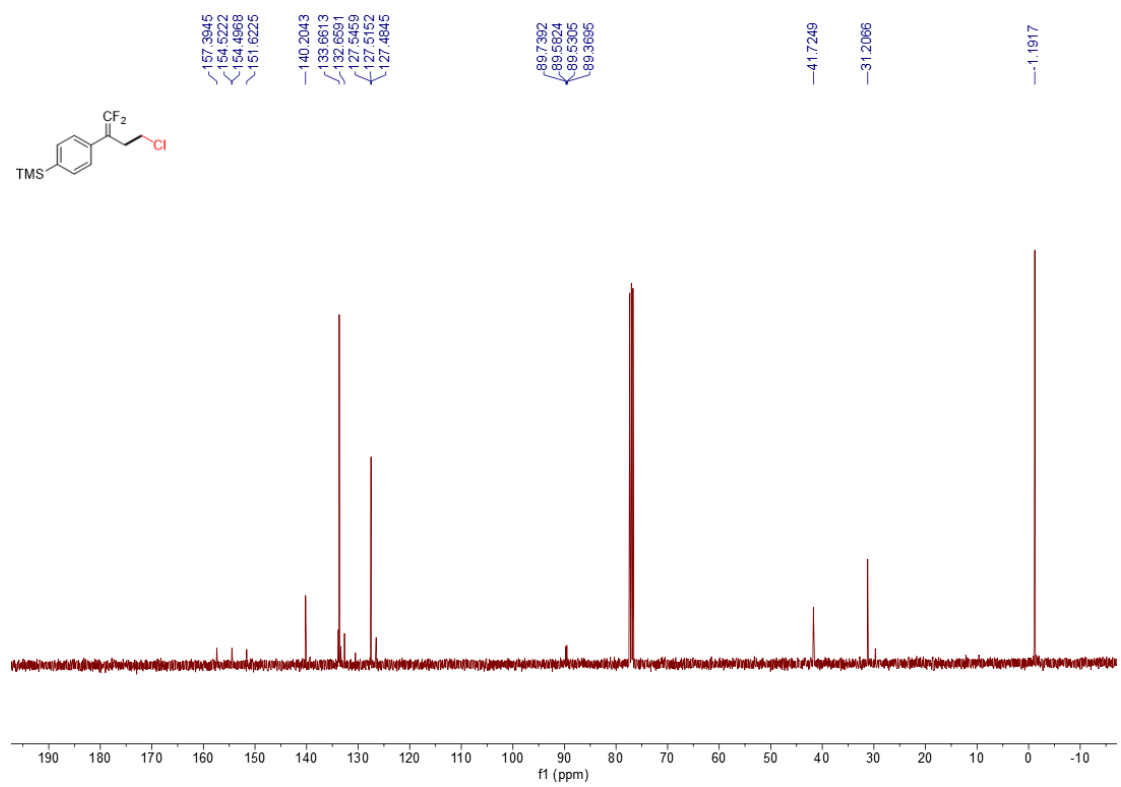

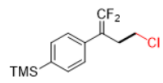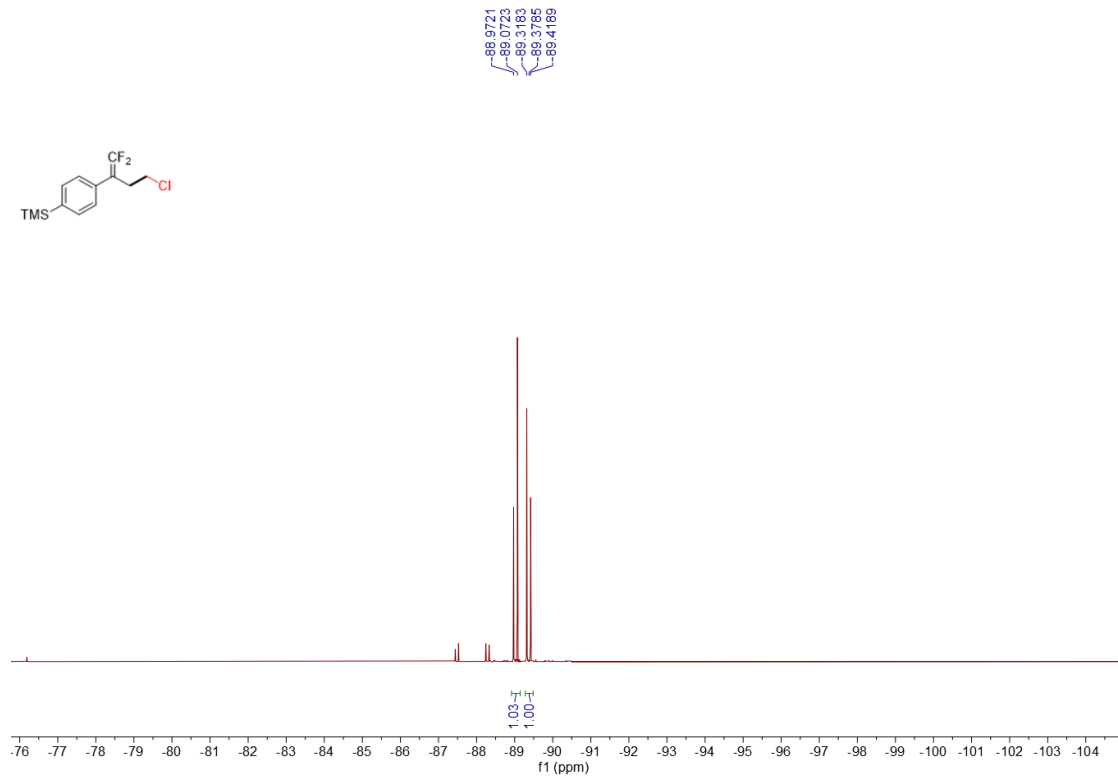

### NMR spectrum of 6

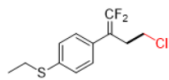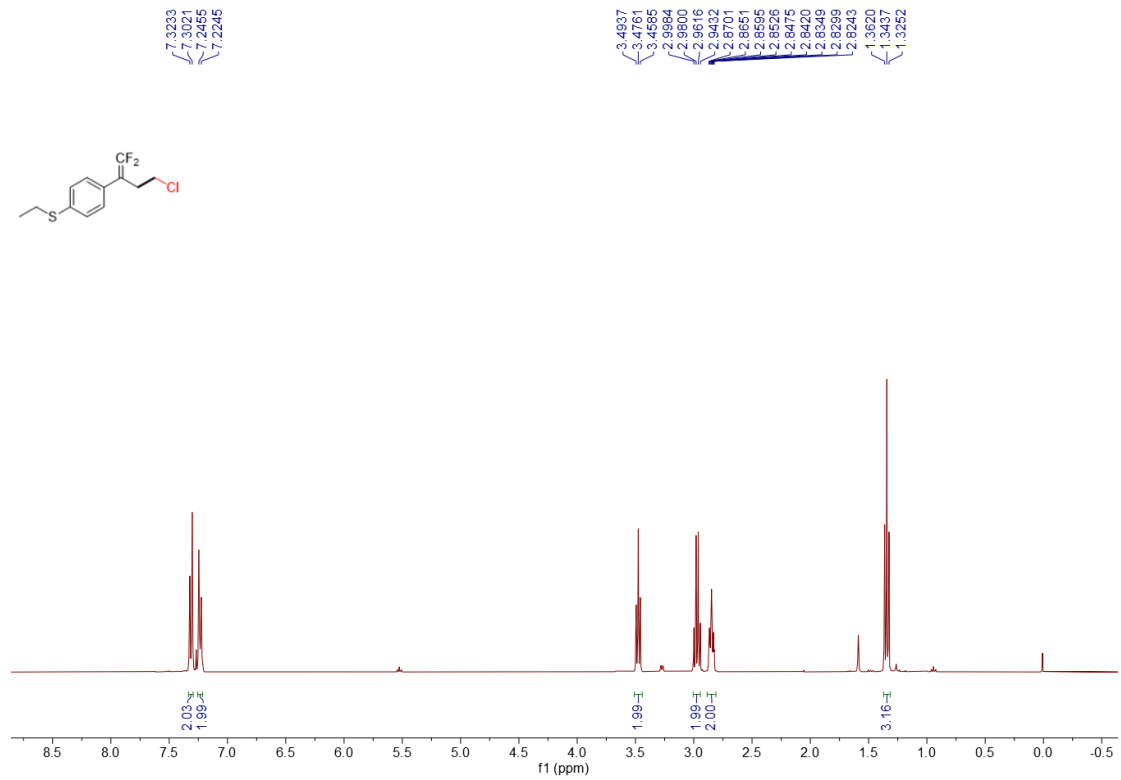

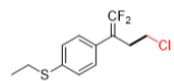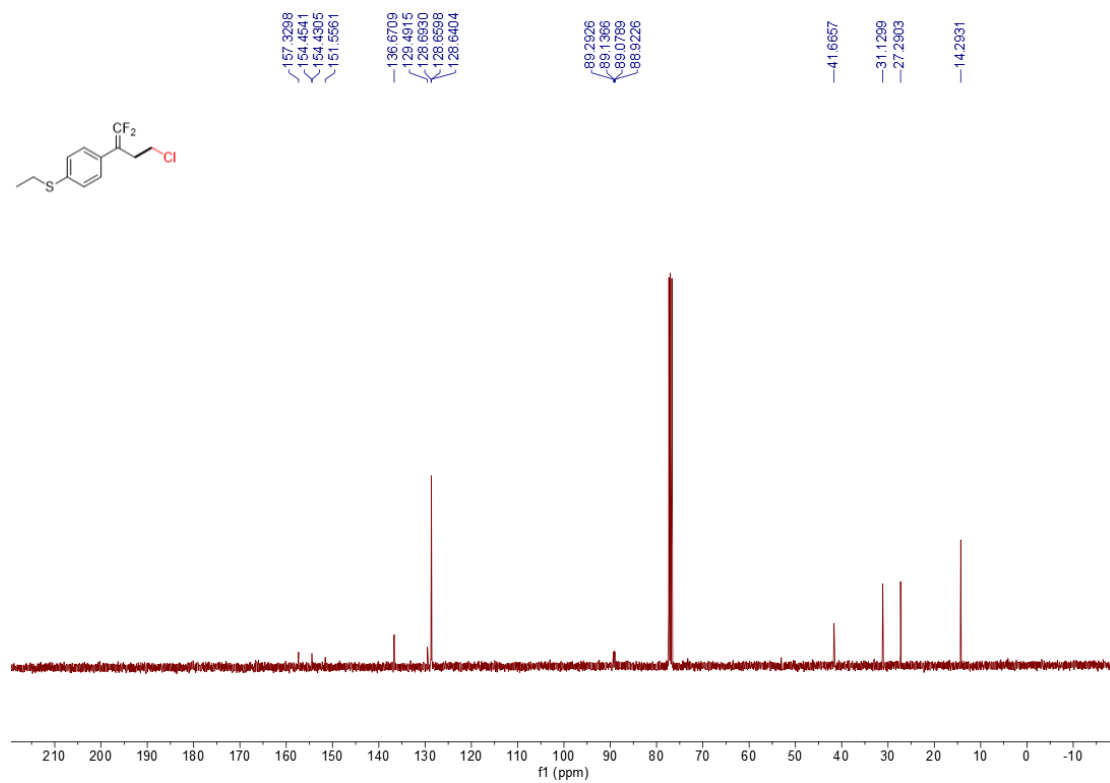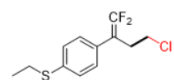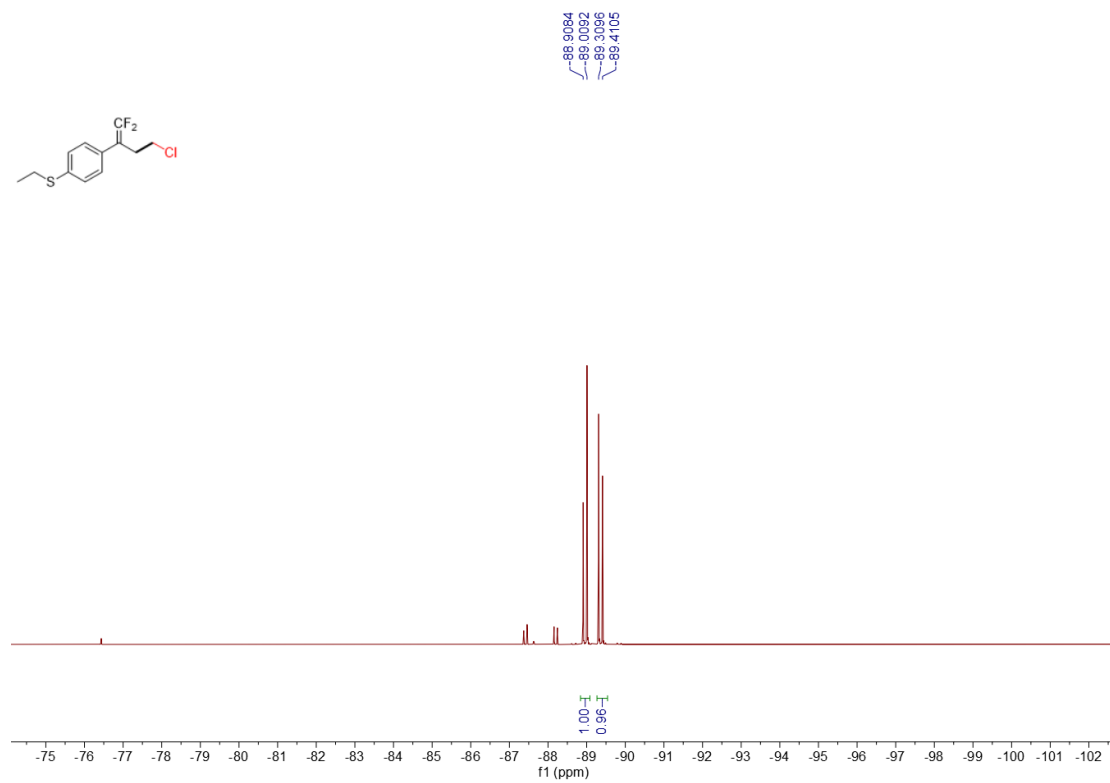

# NMR spectrum of 7

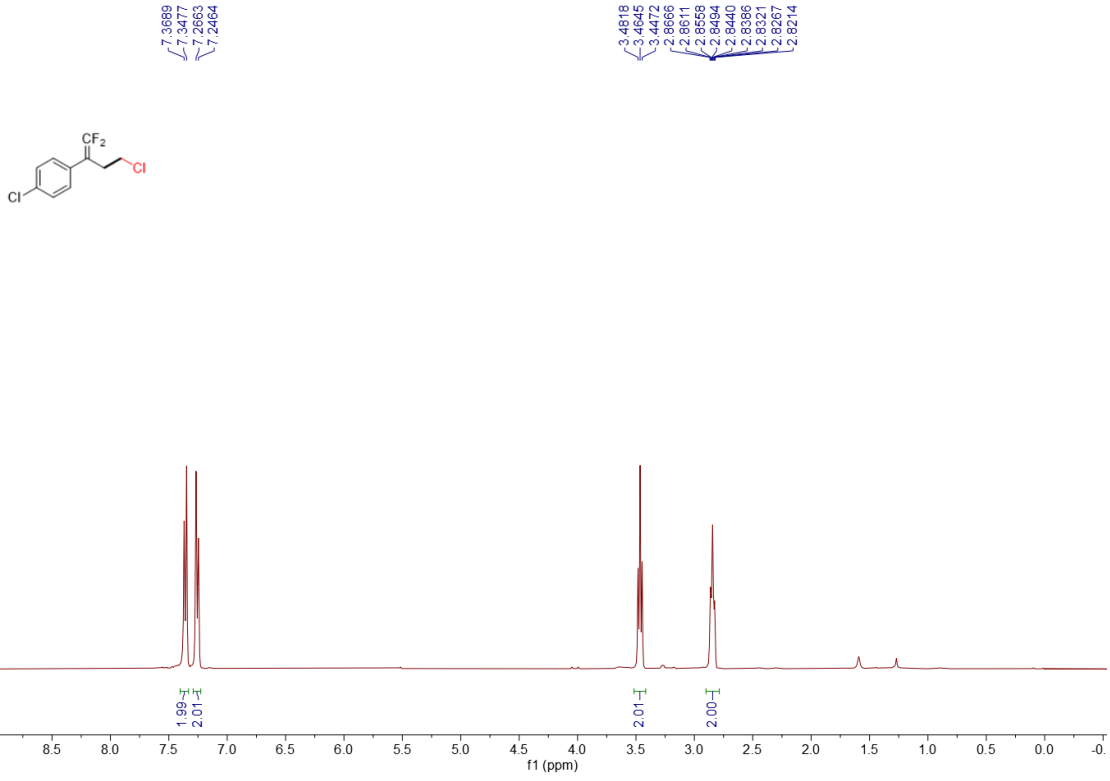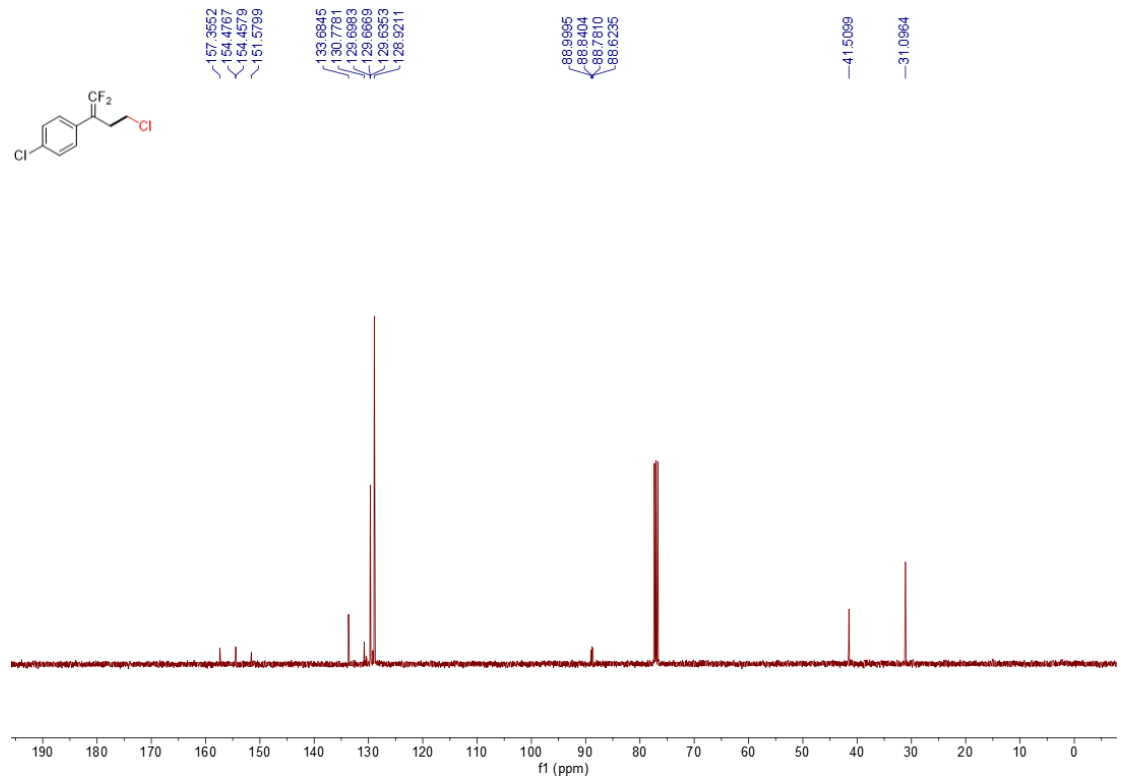



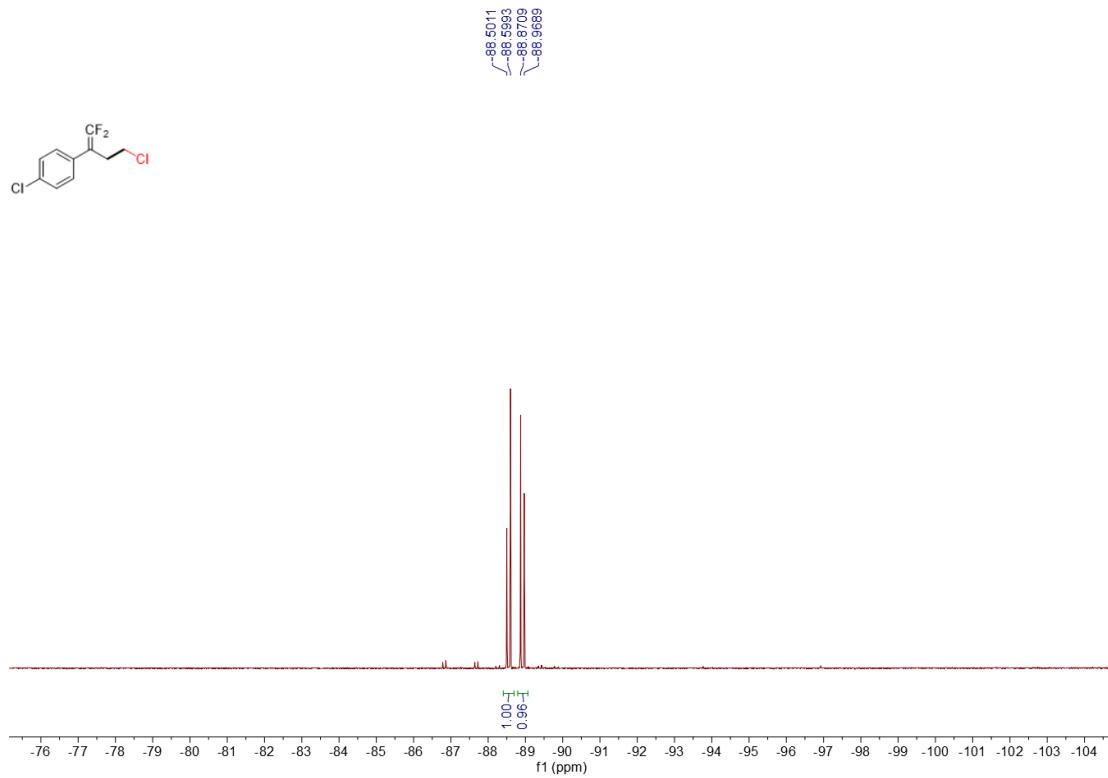

### NMR spectrum of 8

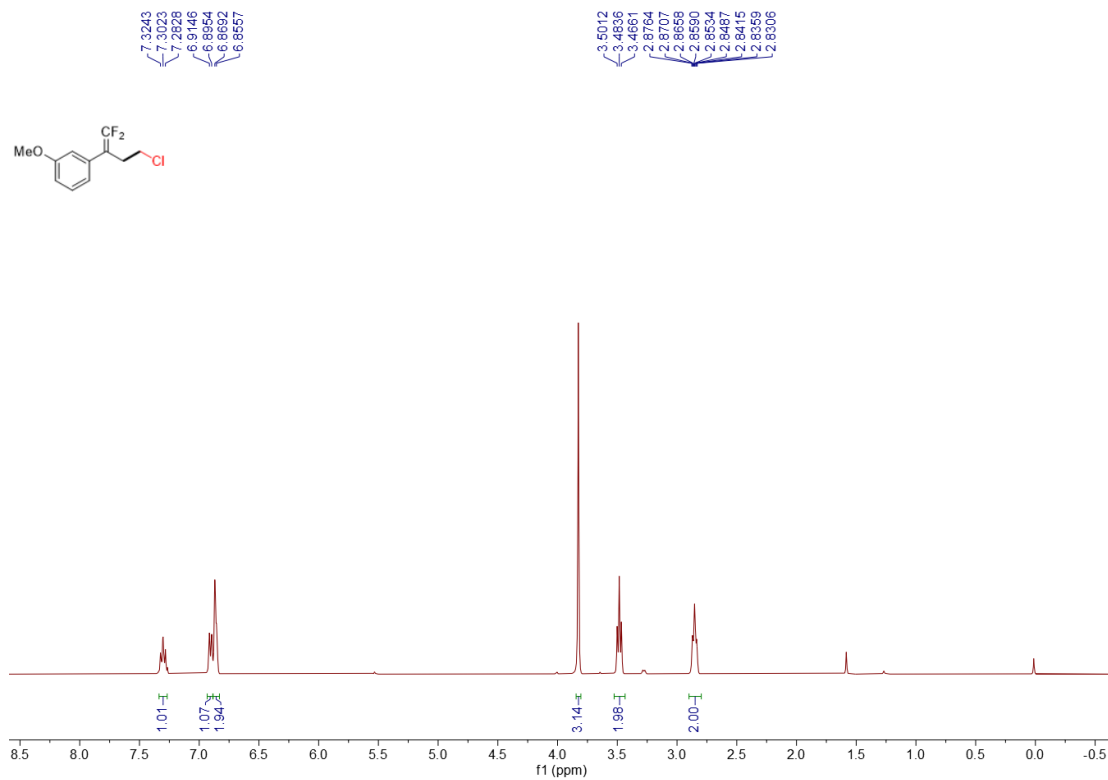

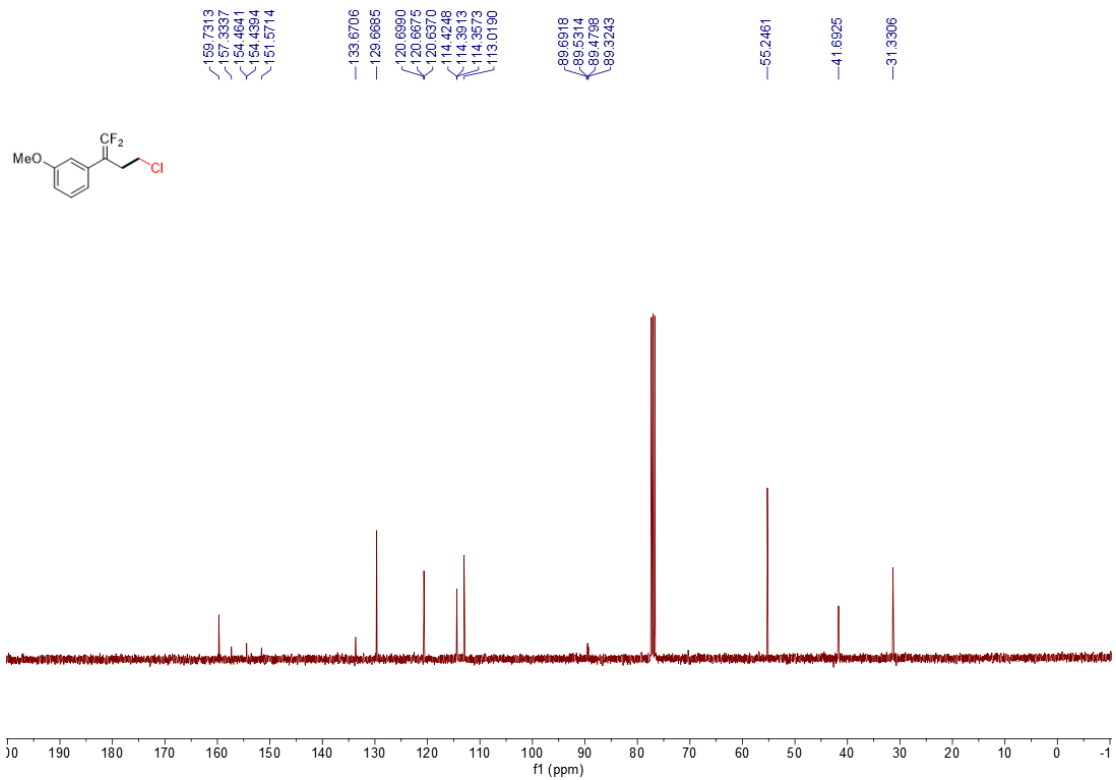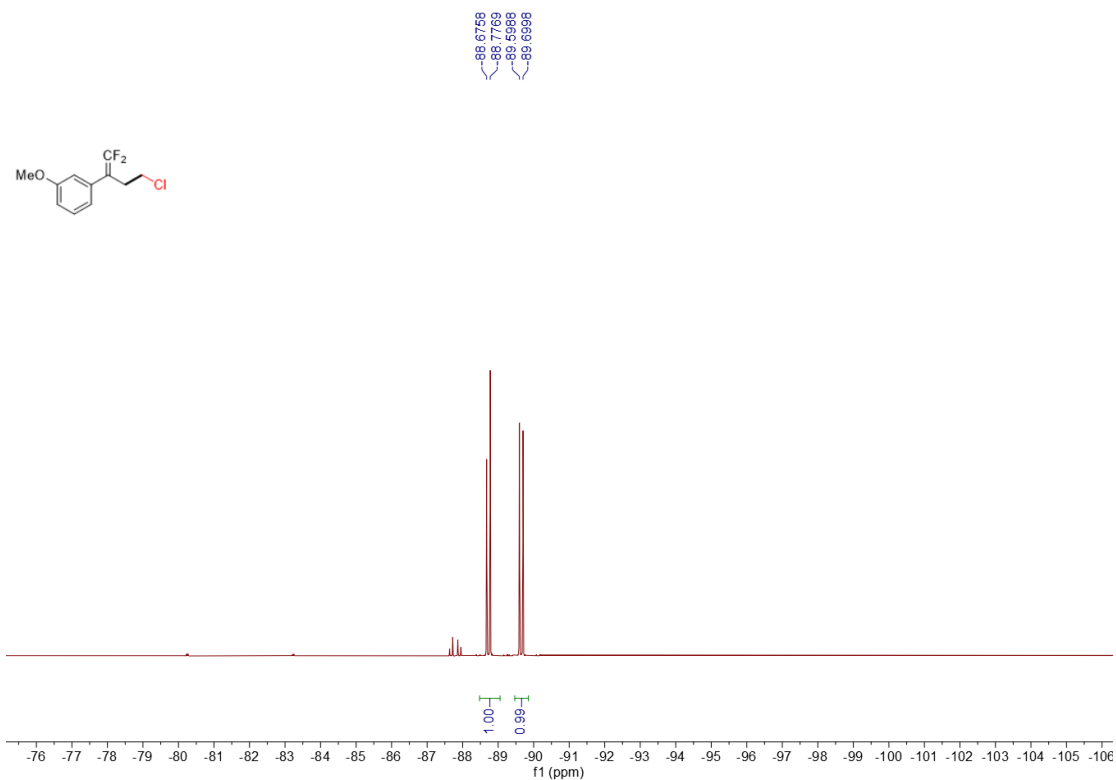

# NMR spectrum of 9

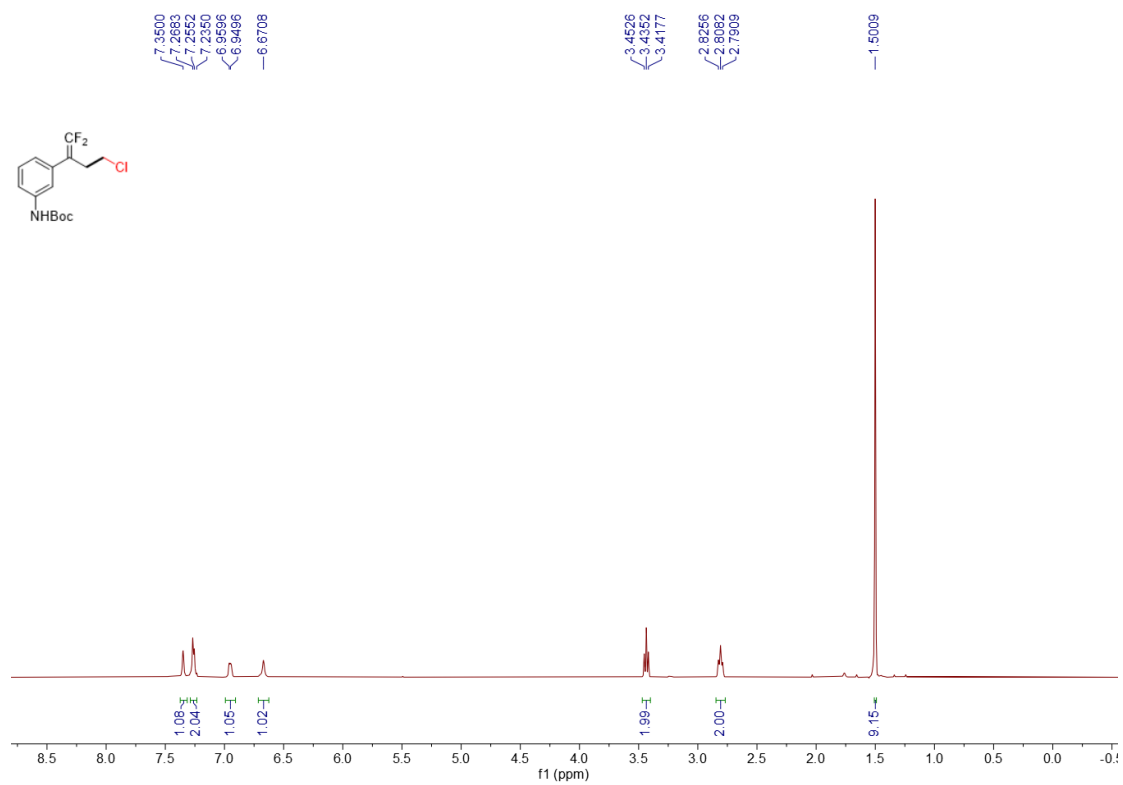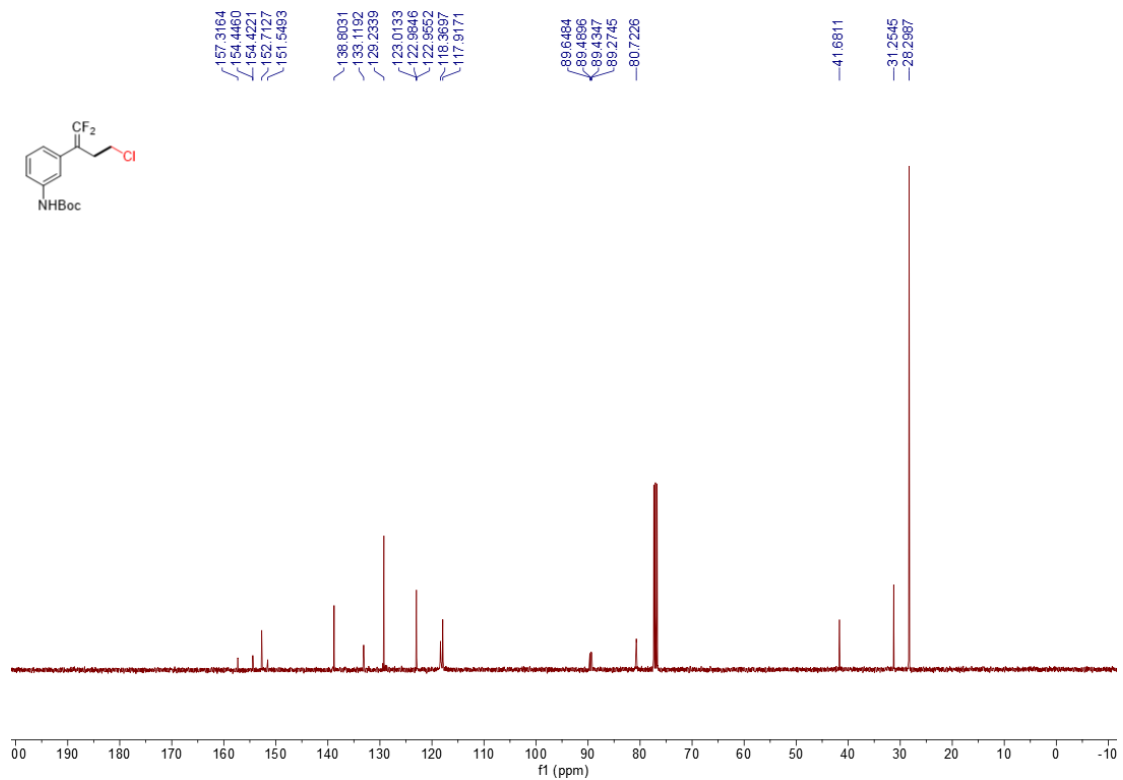

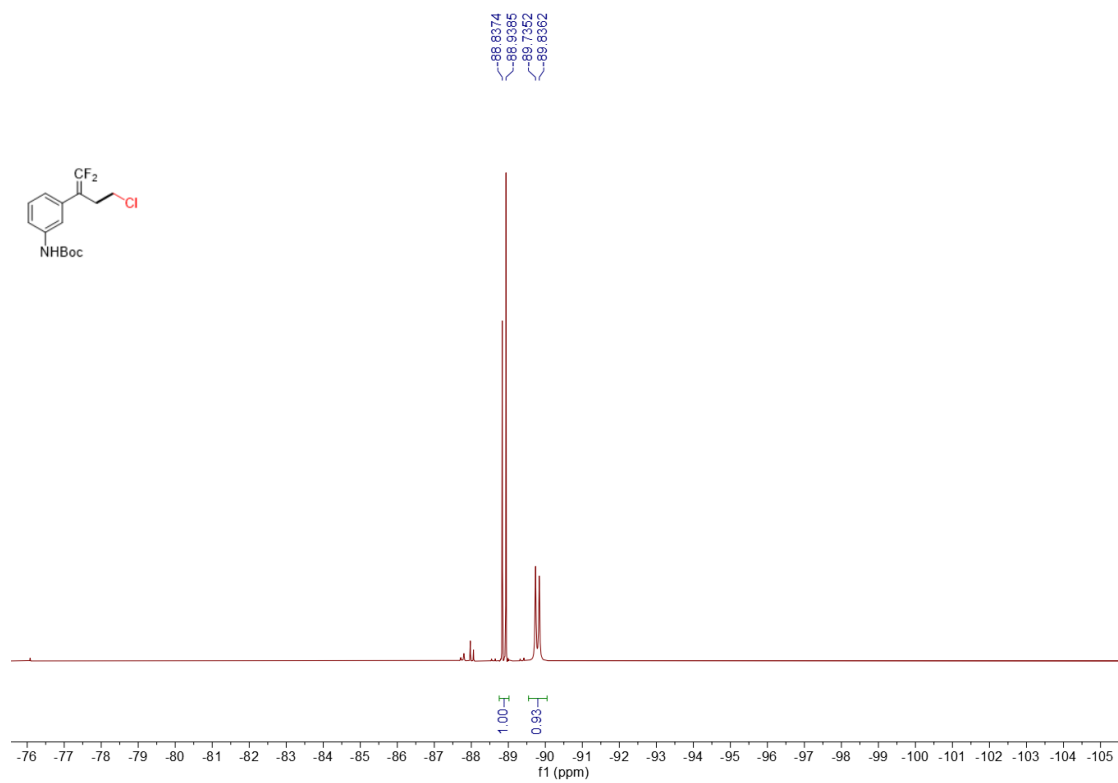

### NMR spectrum of 10

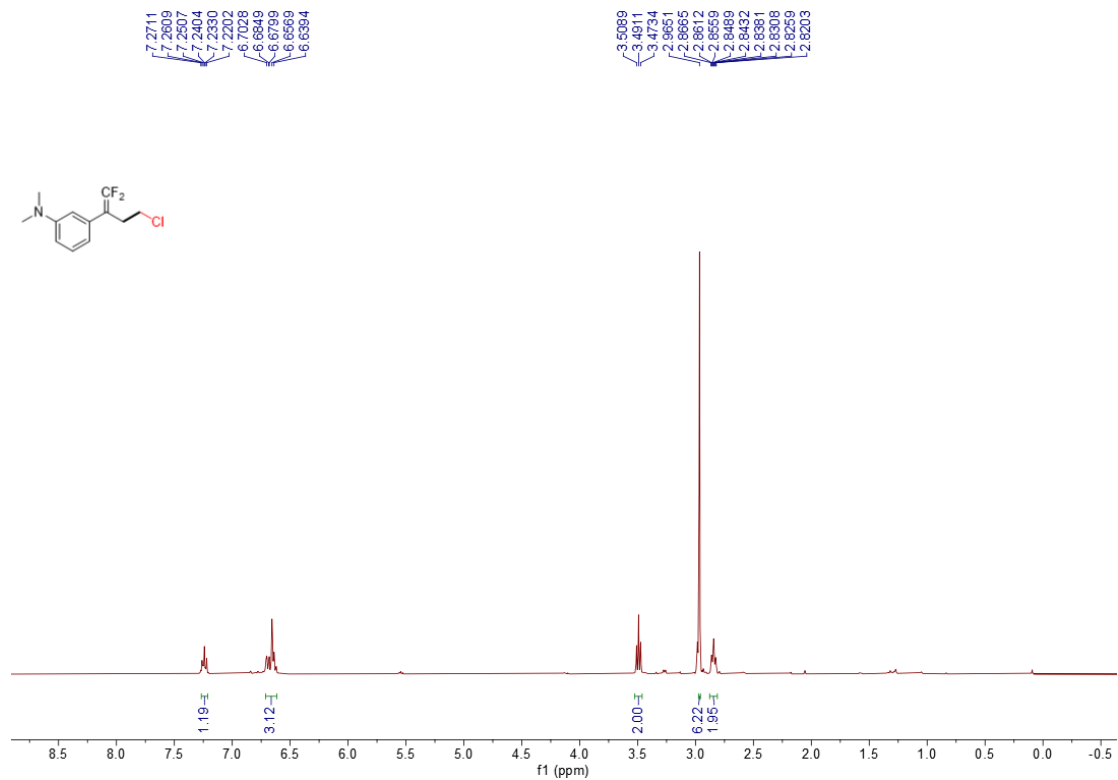

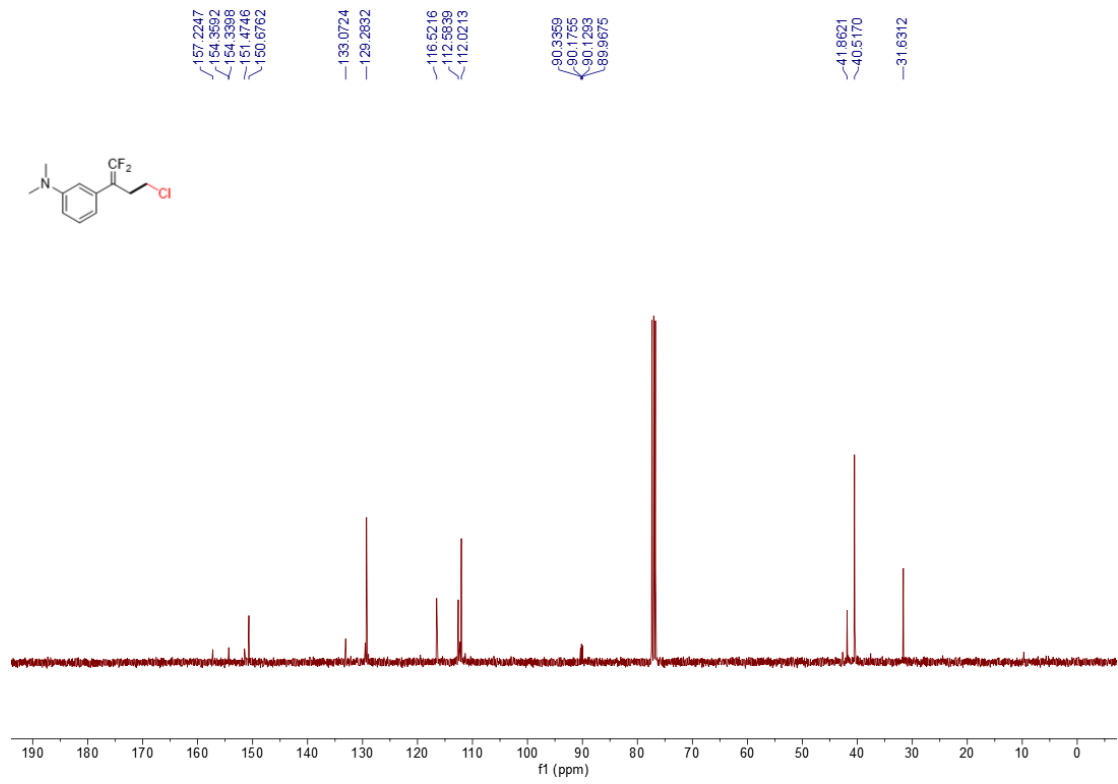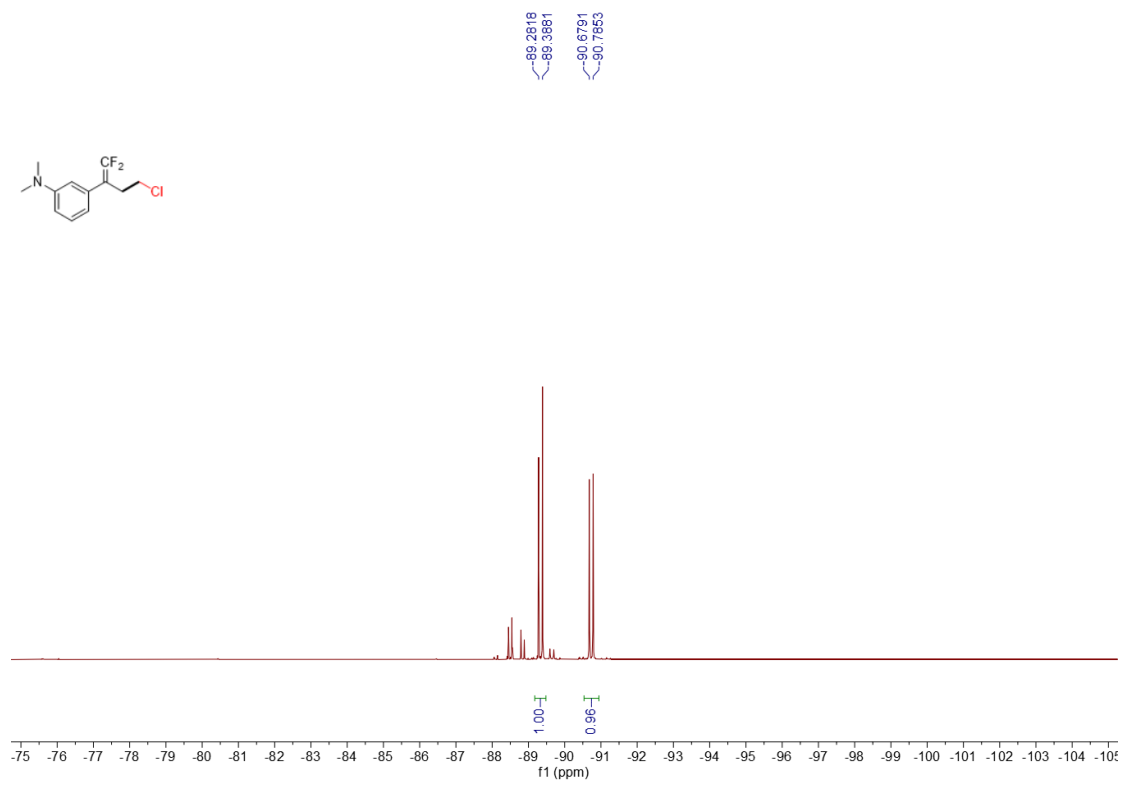

# NMR spectrum of 11

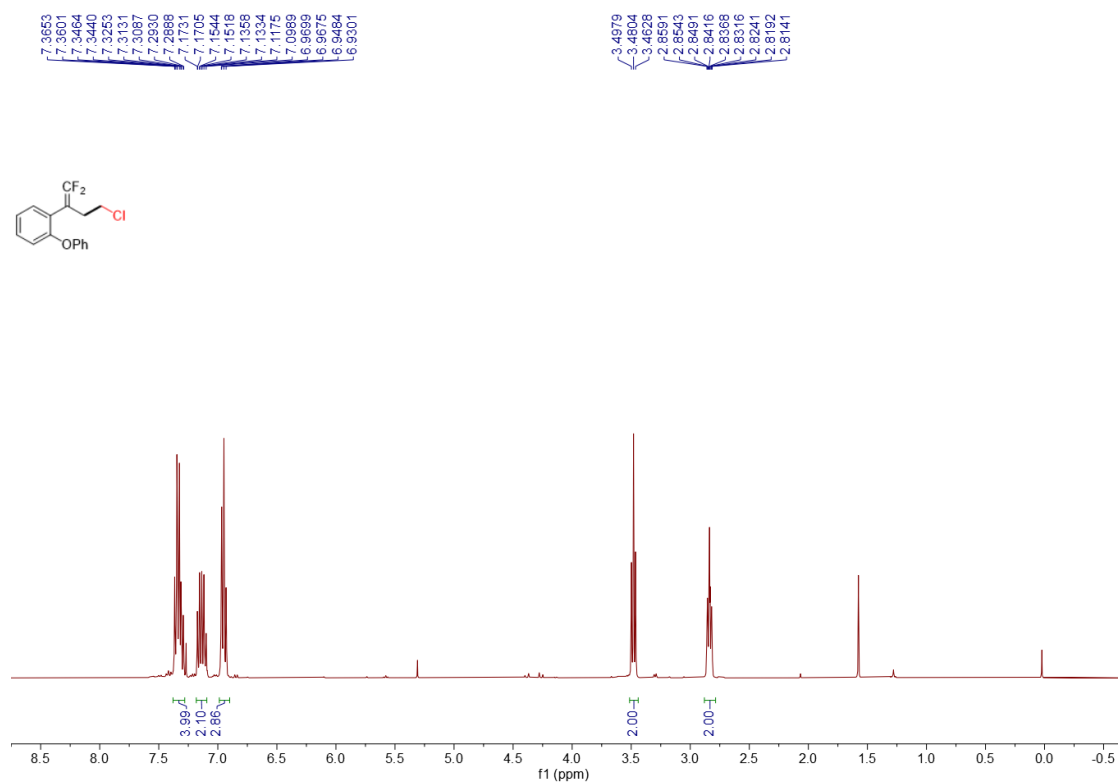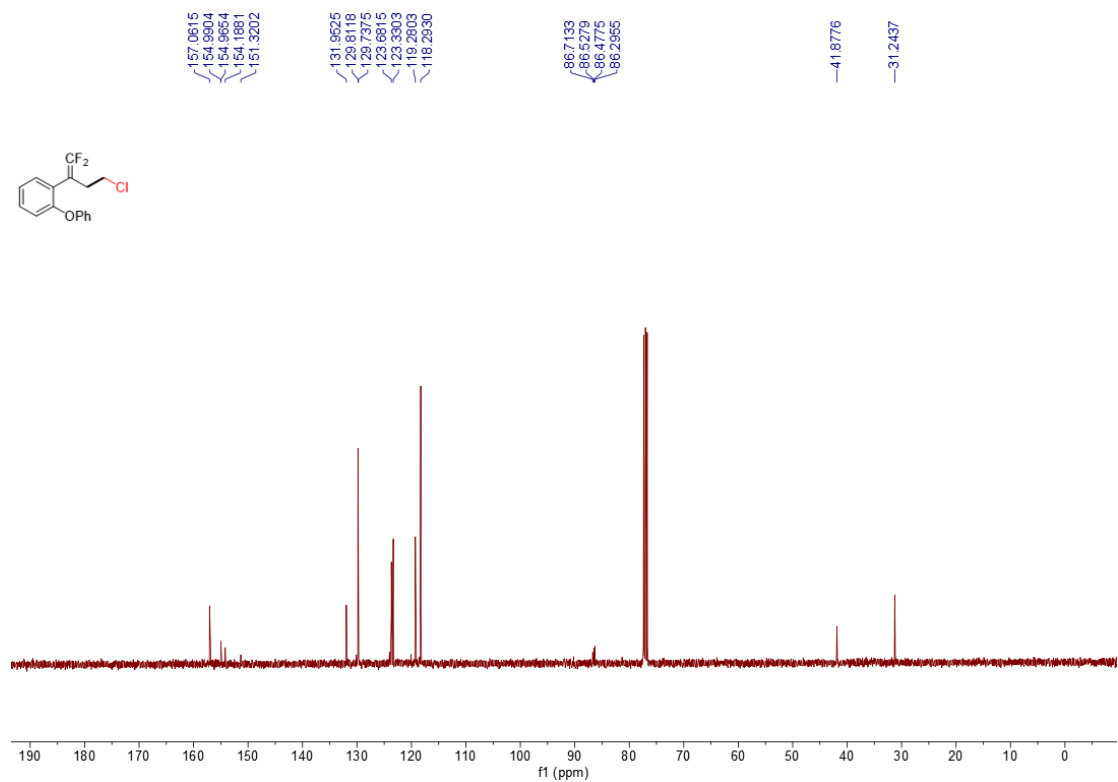

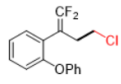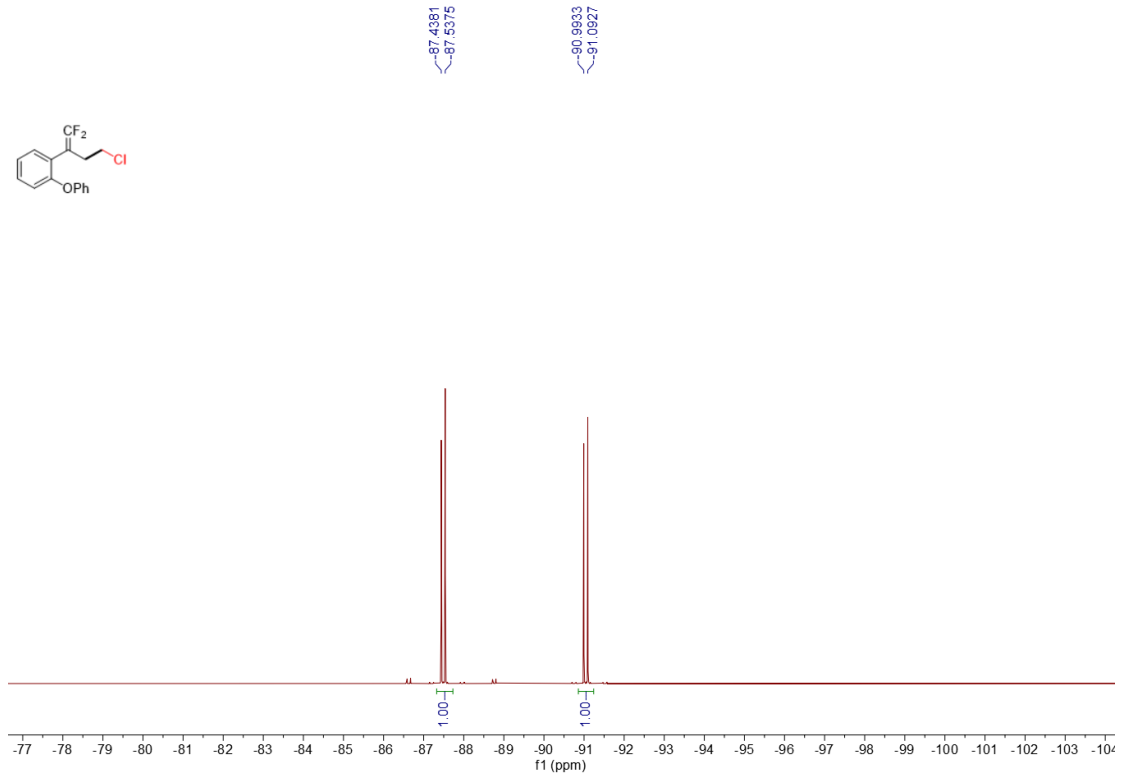

### NMR spectrum of 12

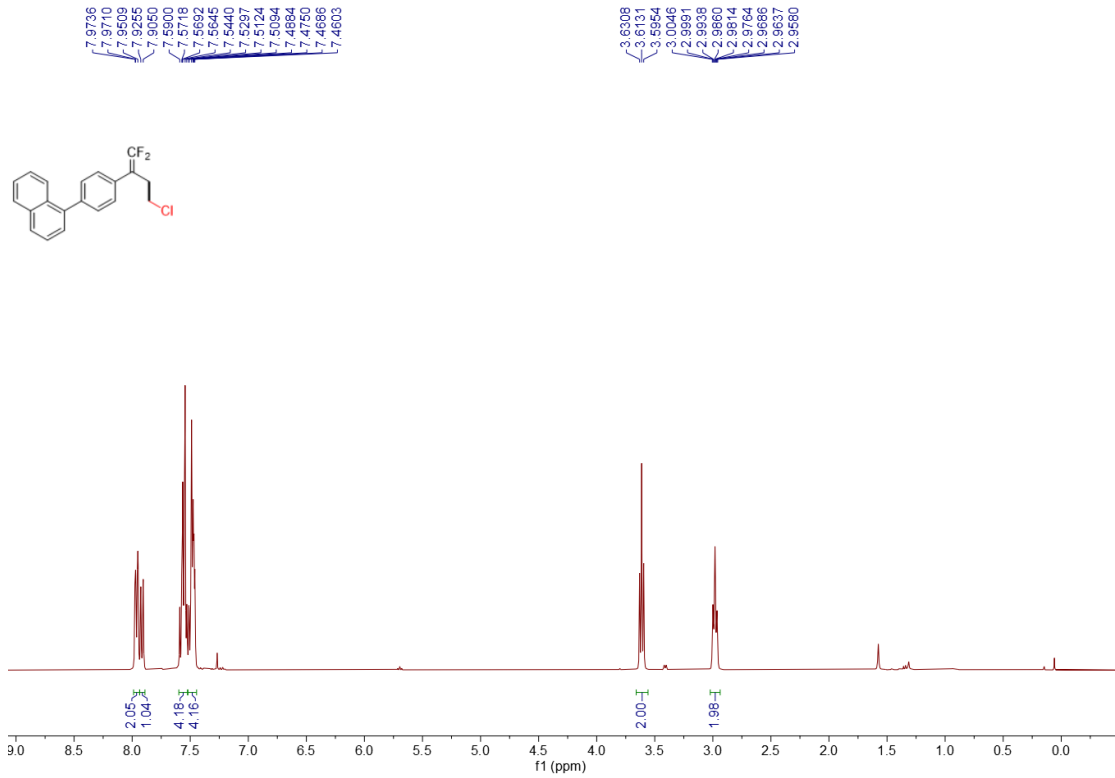

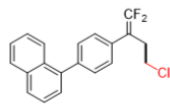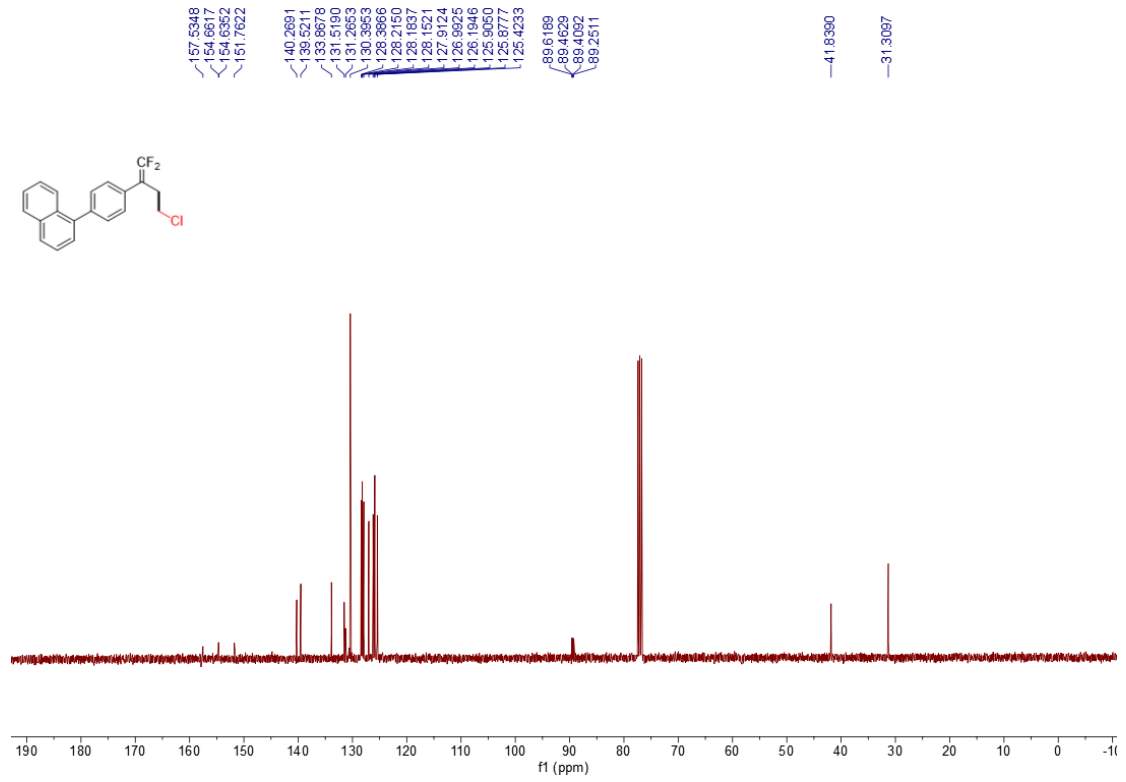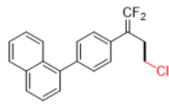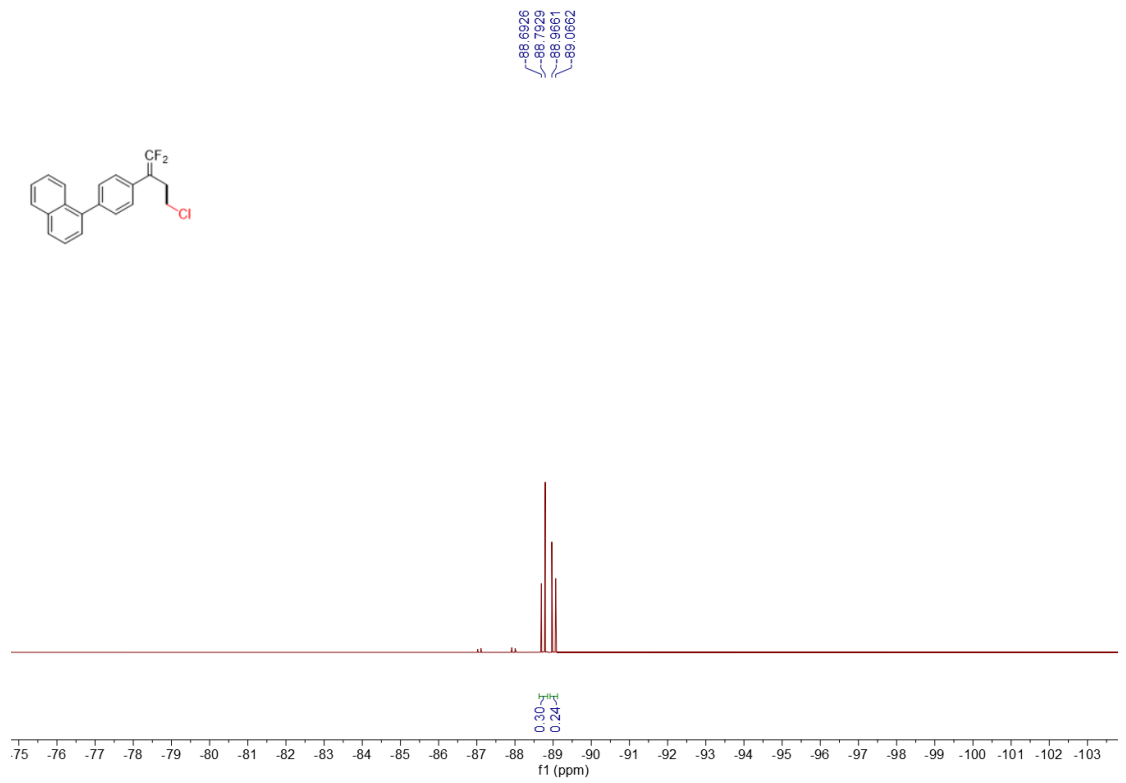



# NMR spectrum of 13

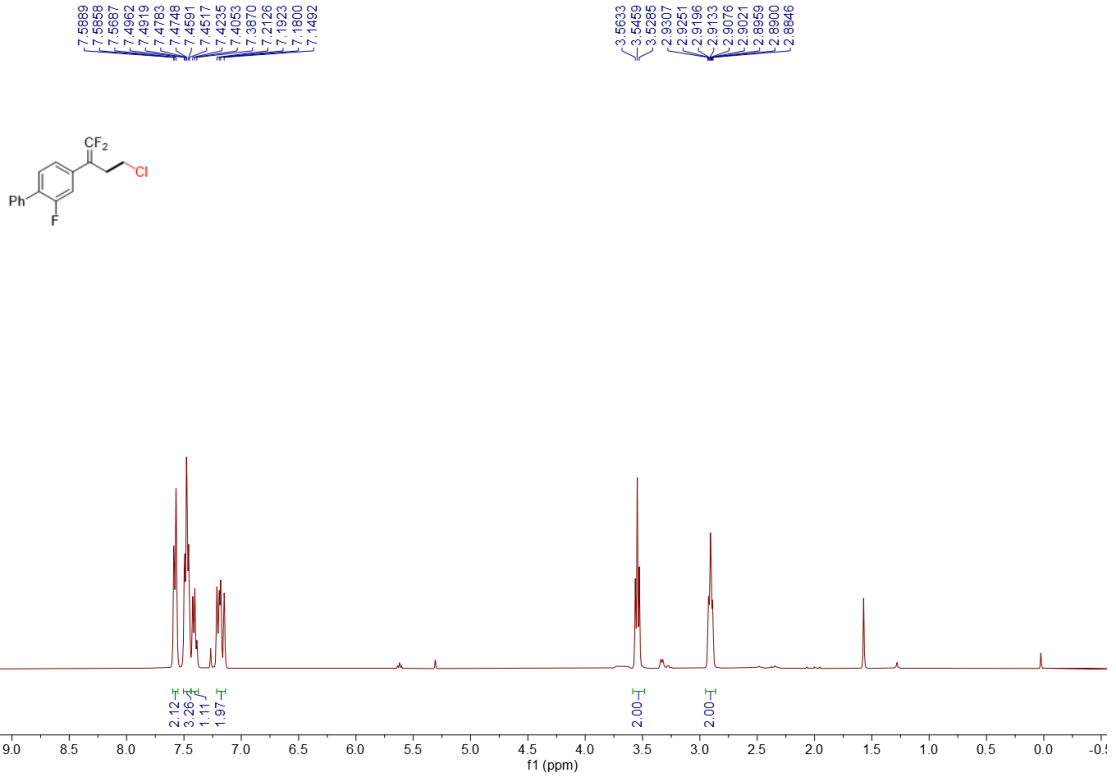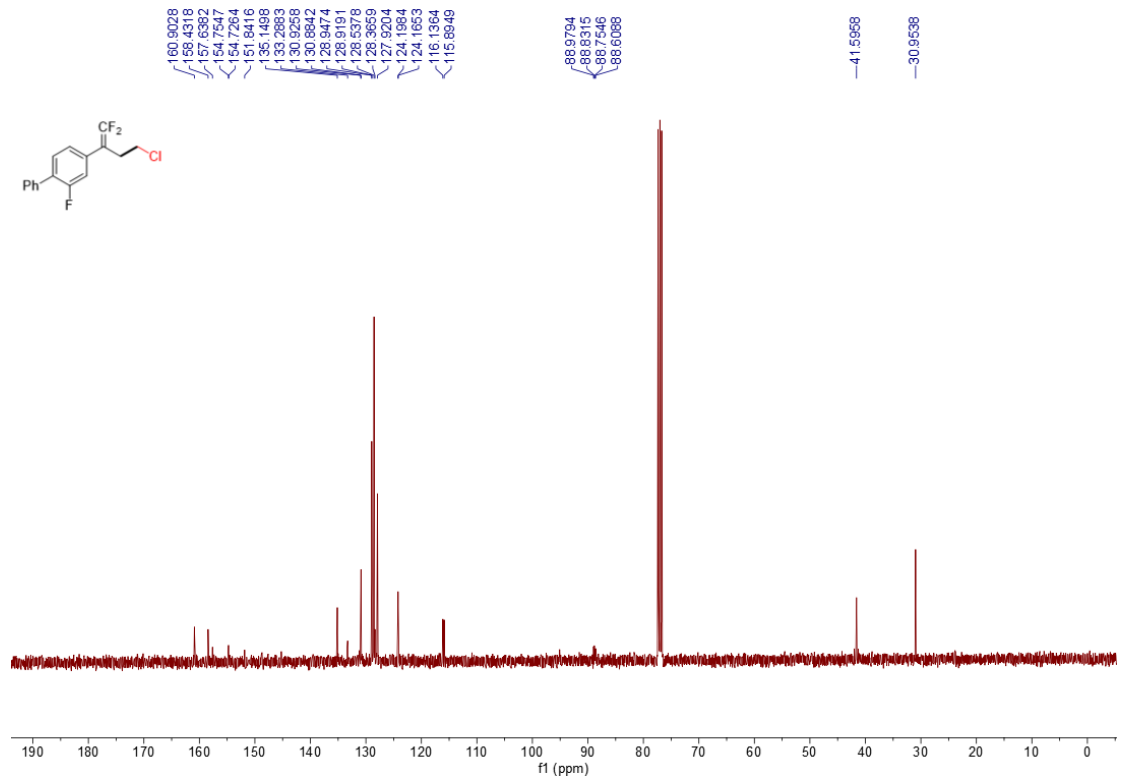

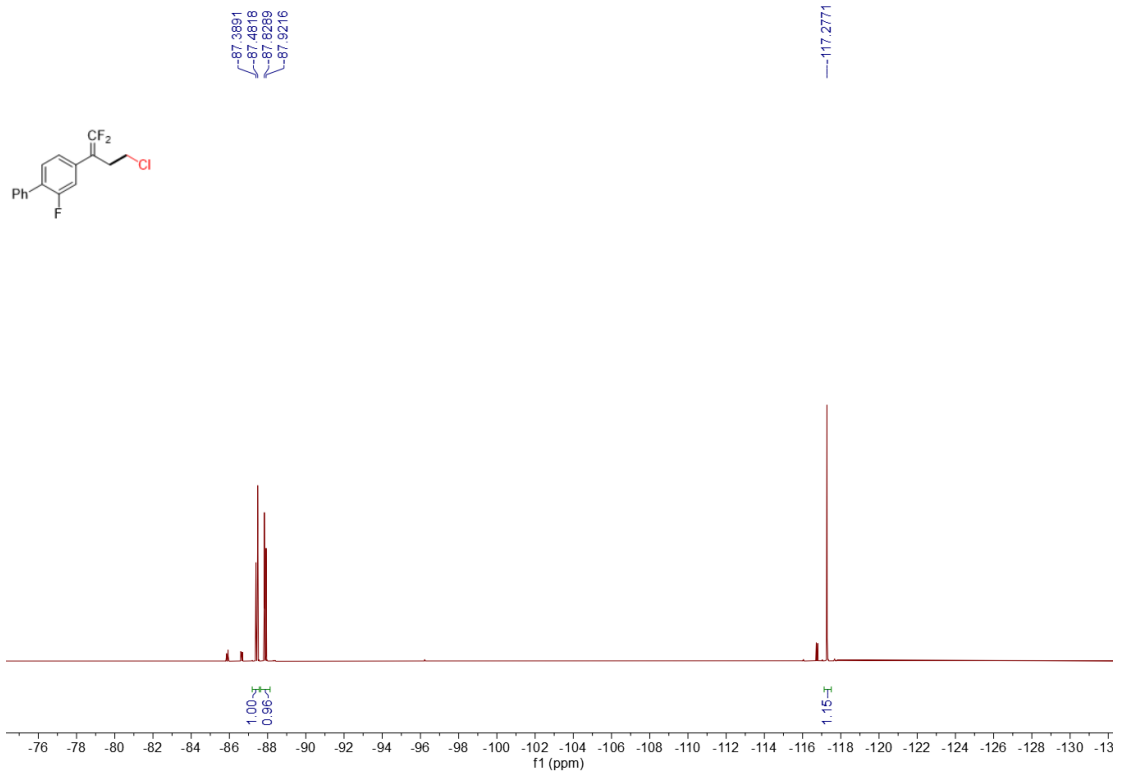

### NMR spectrum of 14

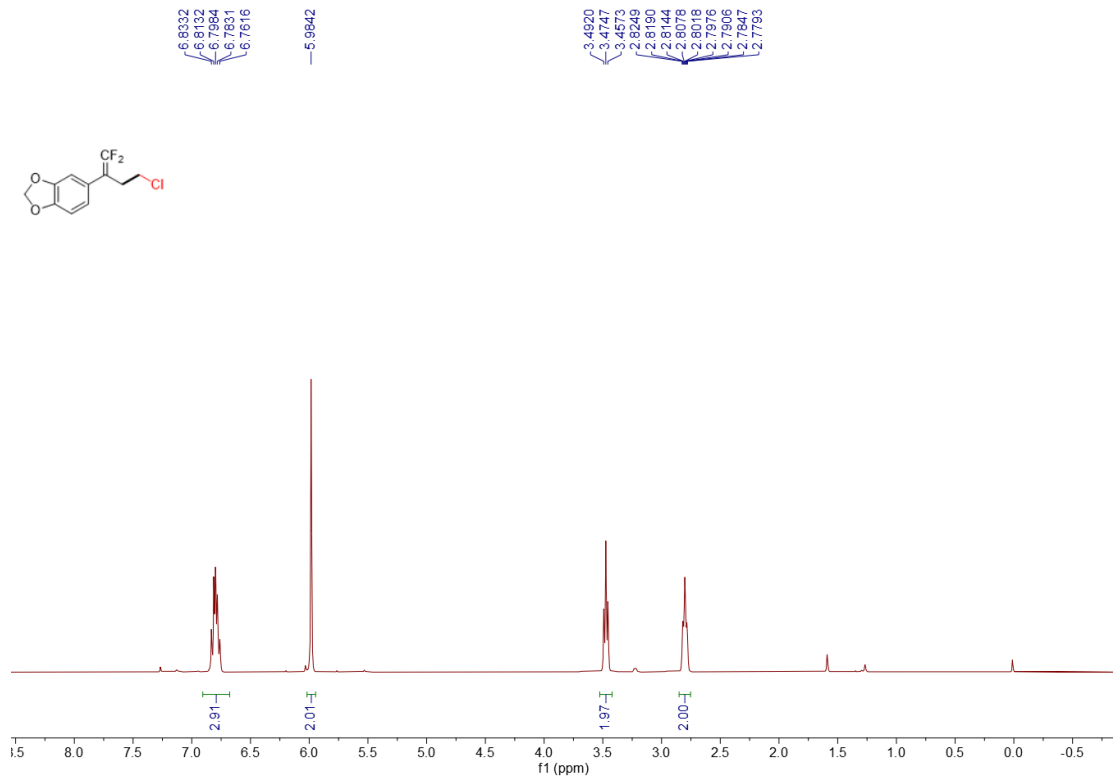

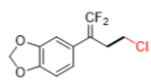

157.2618  
154.3672  
151.5124  
147.9043  
147.1555

125.8177  
121.9757  
121.9448  
121.9142

108.9239  
108.8904  
108.8589  
108.4757  
101.2488

89.4704  
89.3101  
89.2546  
89.0504

41.6395

31.5359

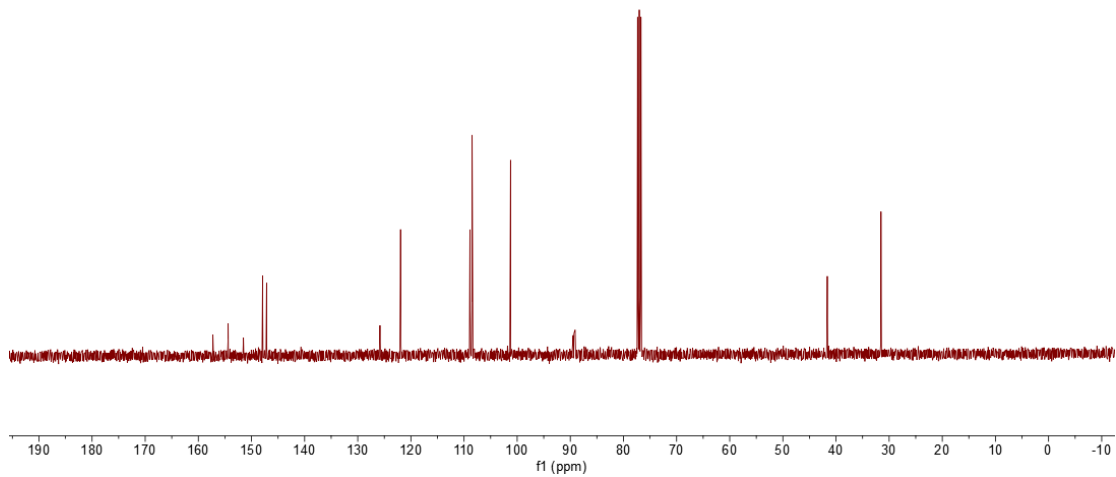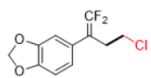

89.5404  
89.6463  
90.4147  
90.5210

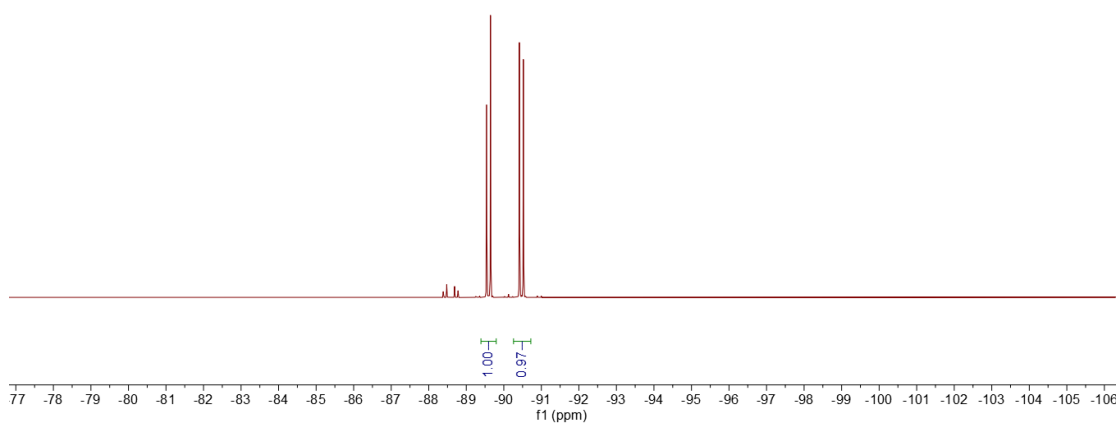

# NMR spectrum of 15

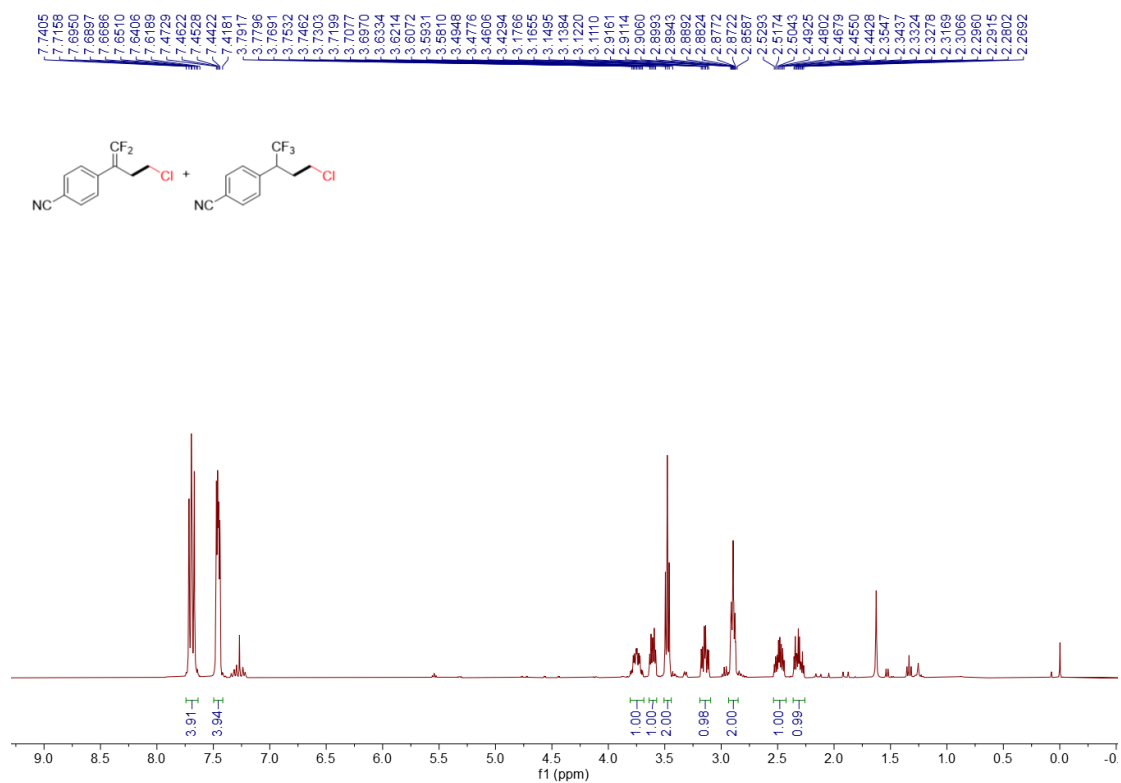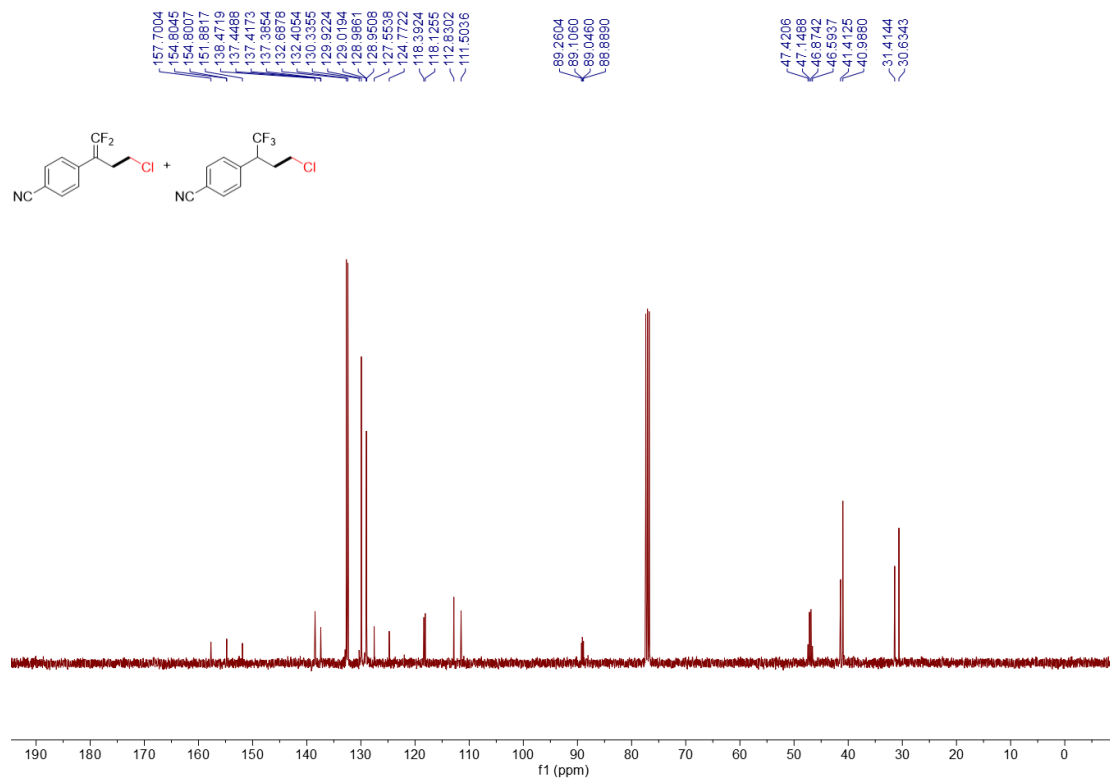

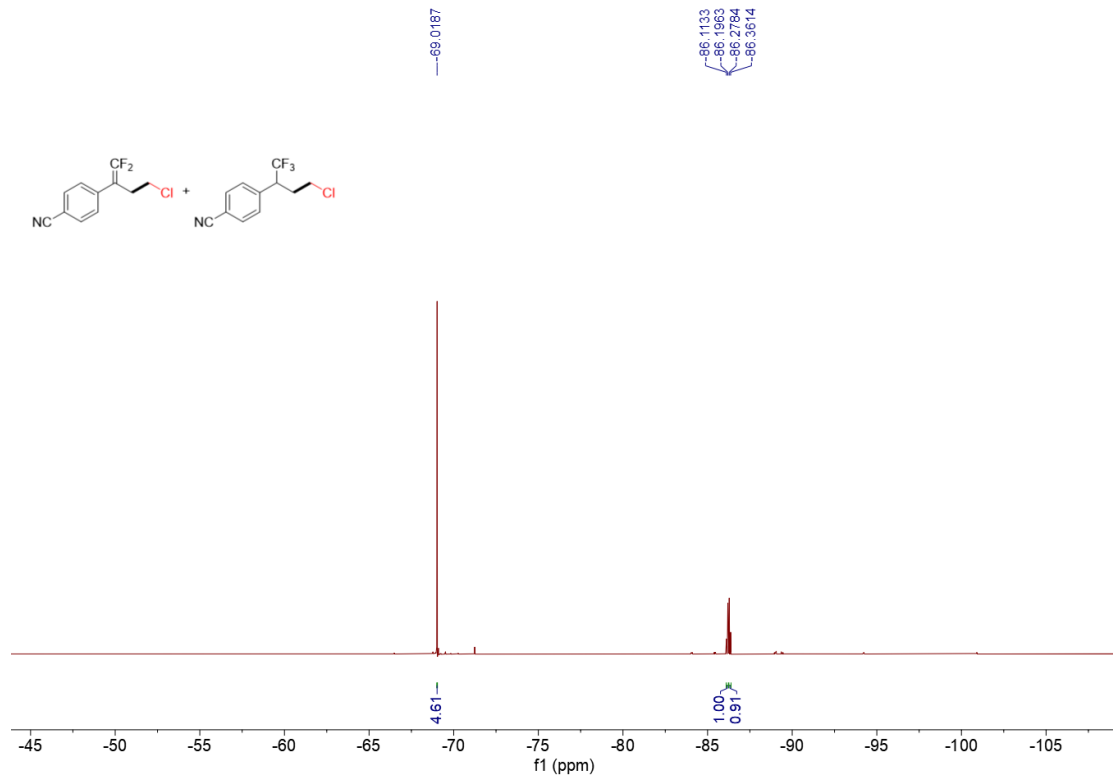

**NMR spectrum of 16**

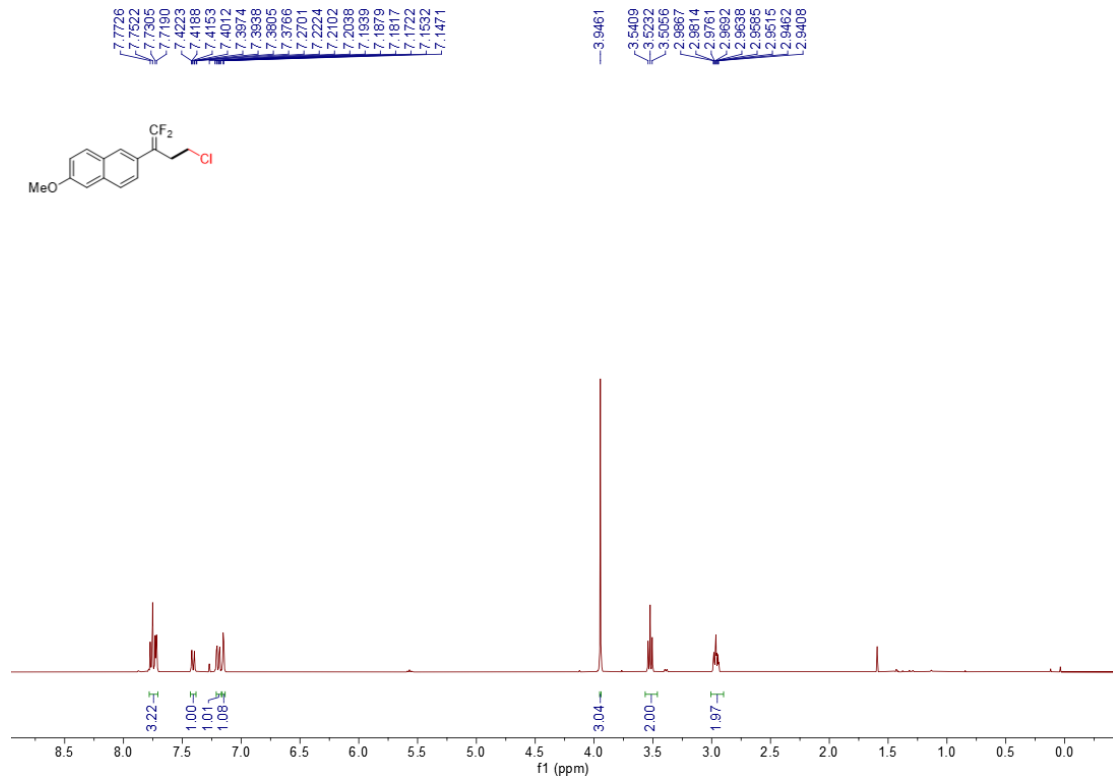

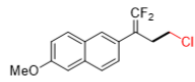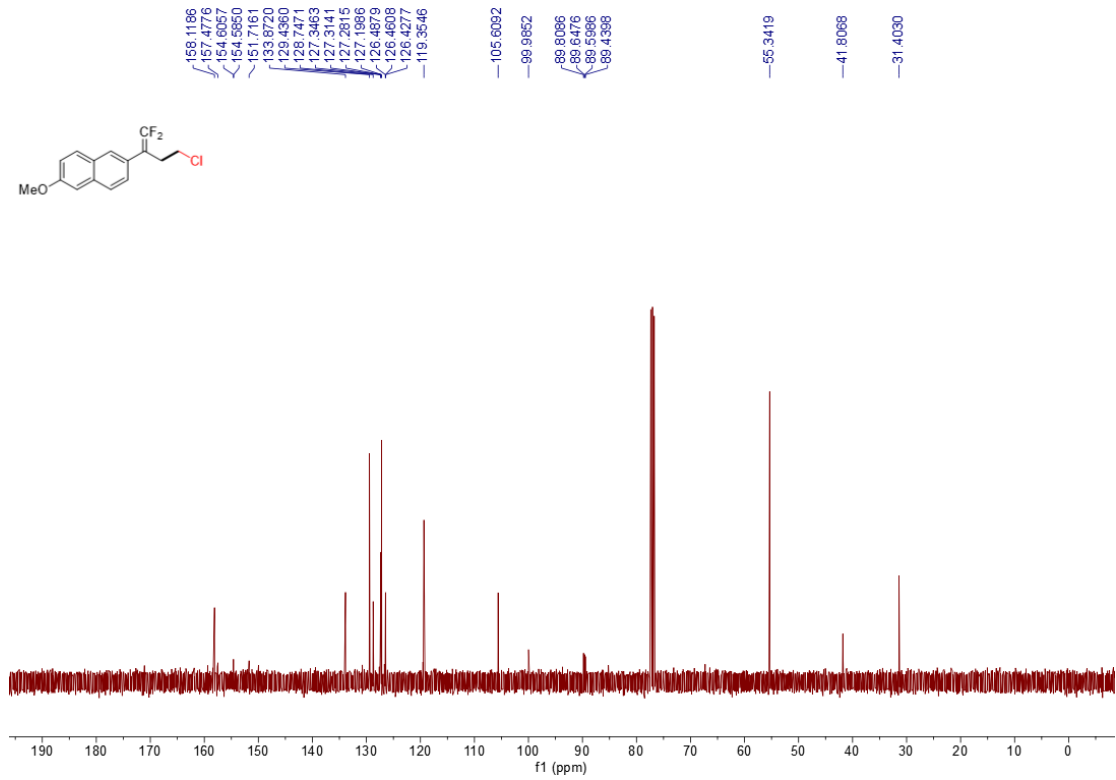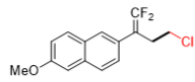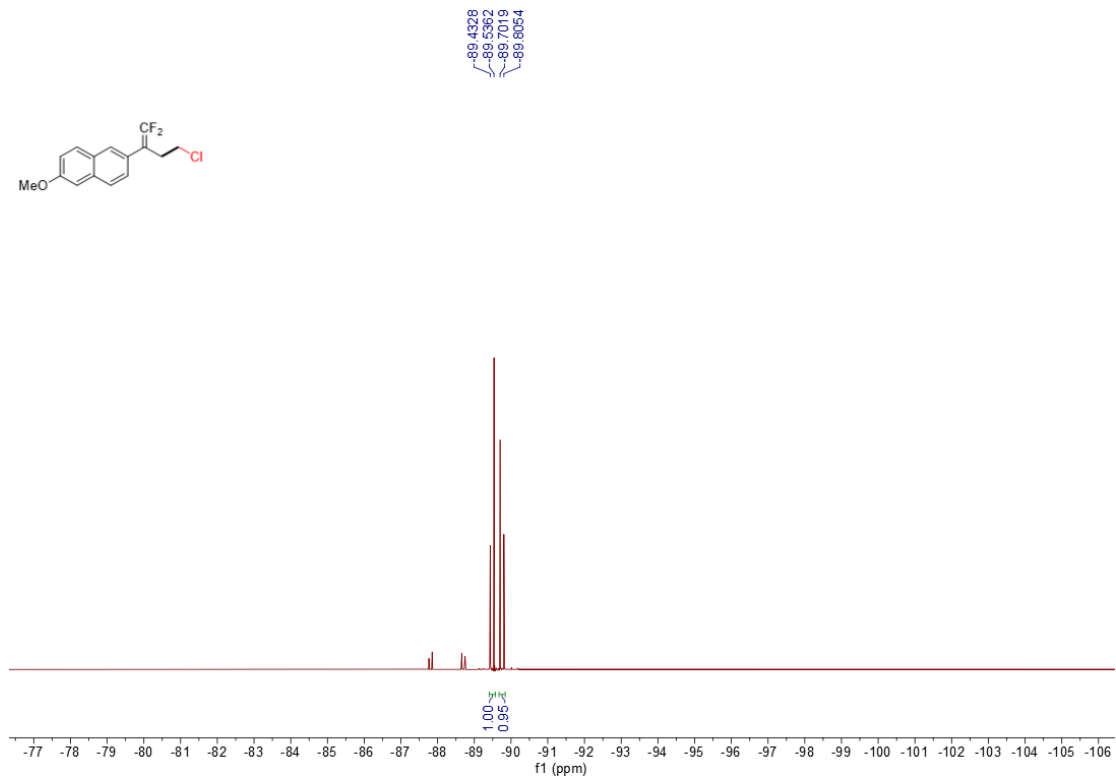

# NMR spectrum of 17

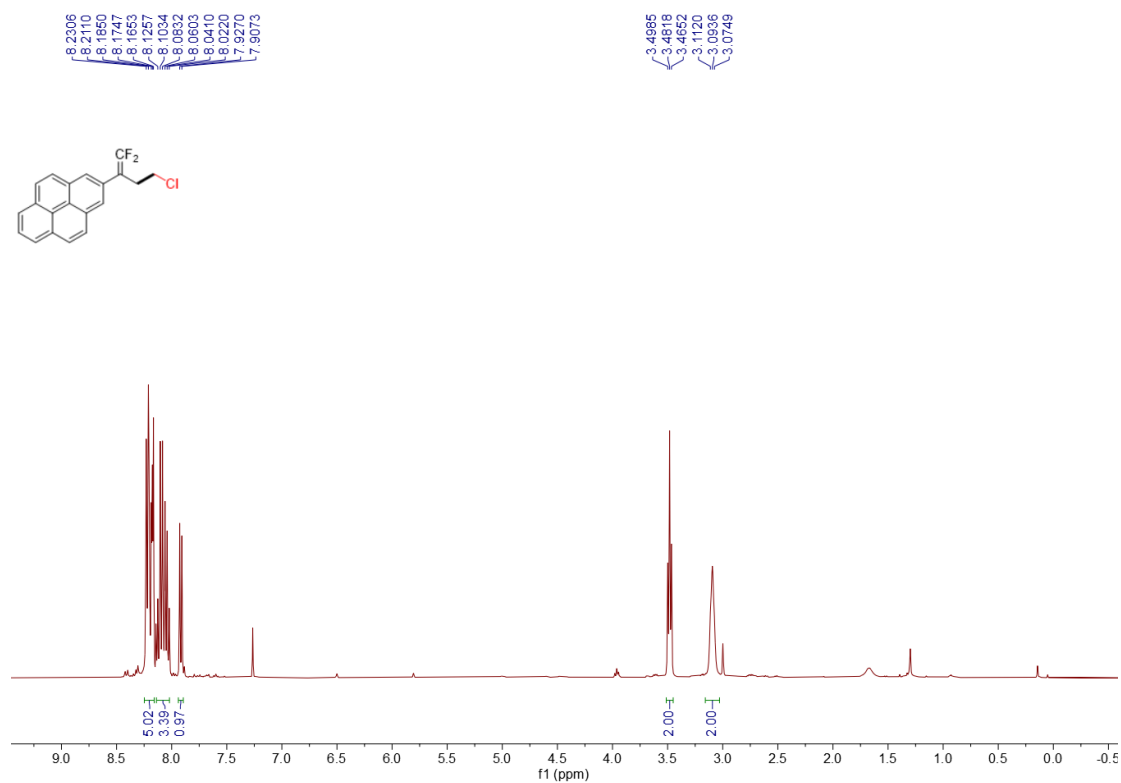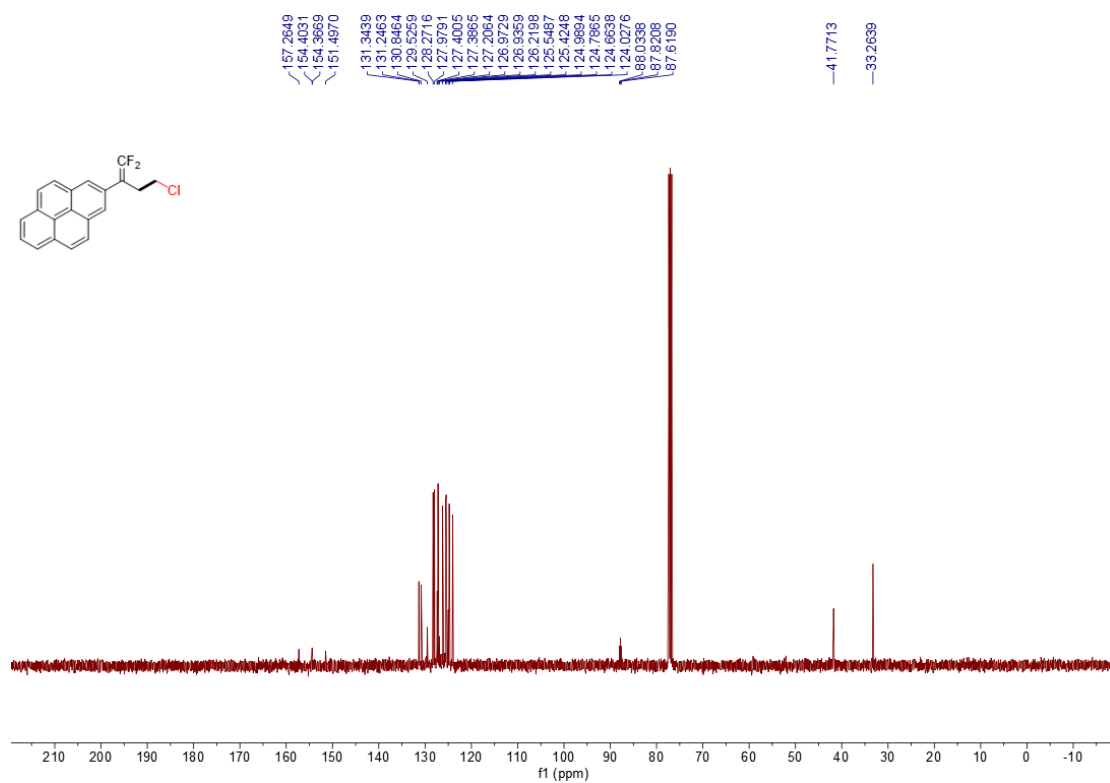

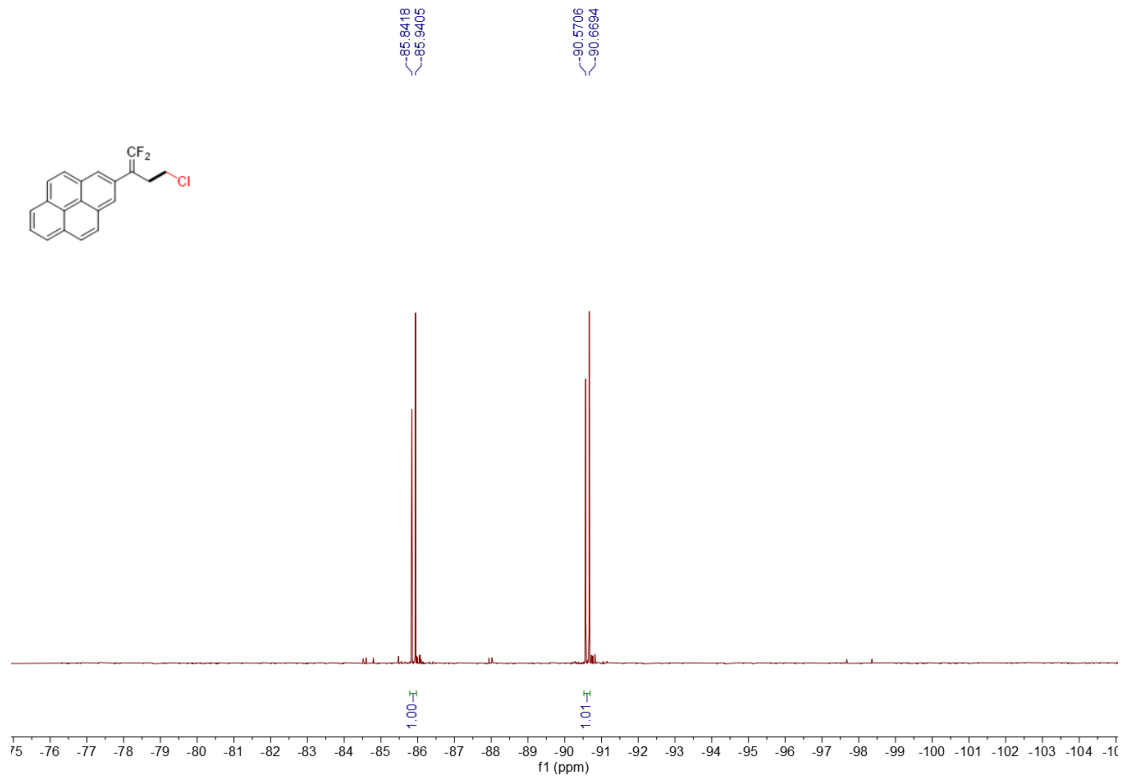

### NMR spectrum of 18

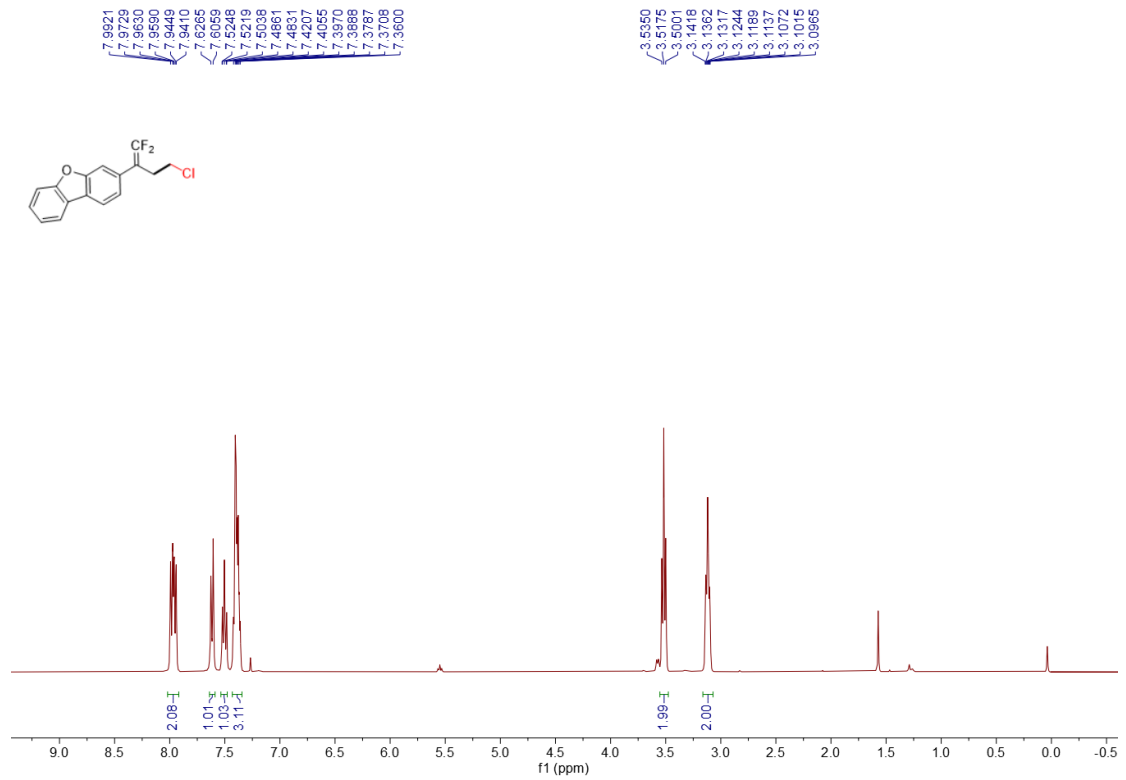



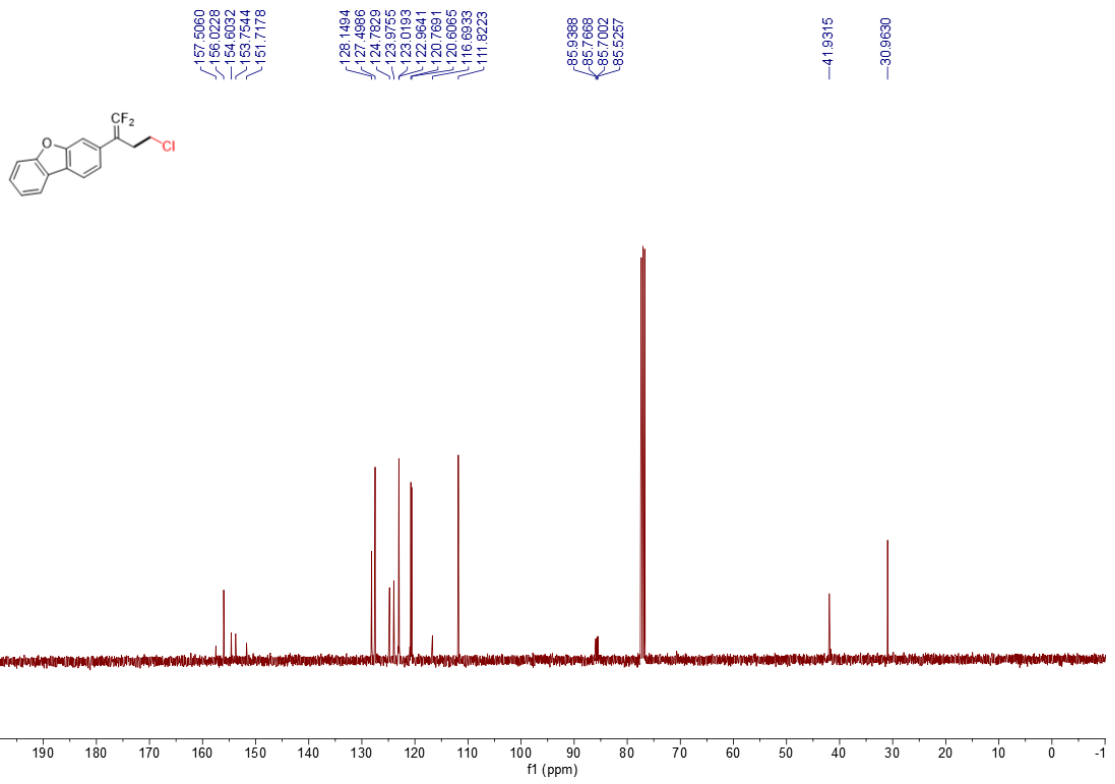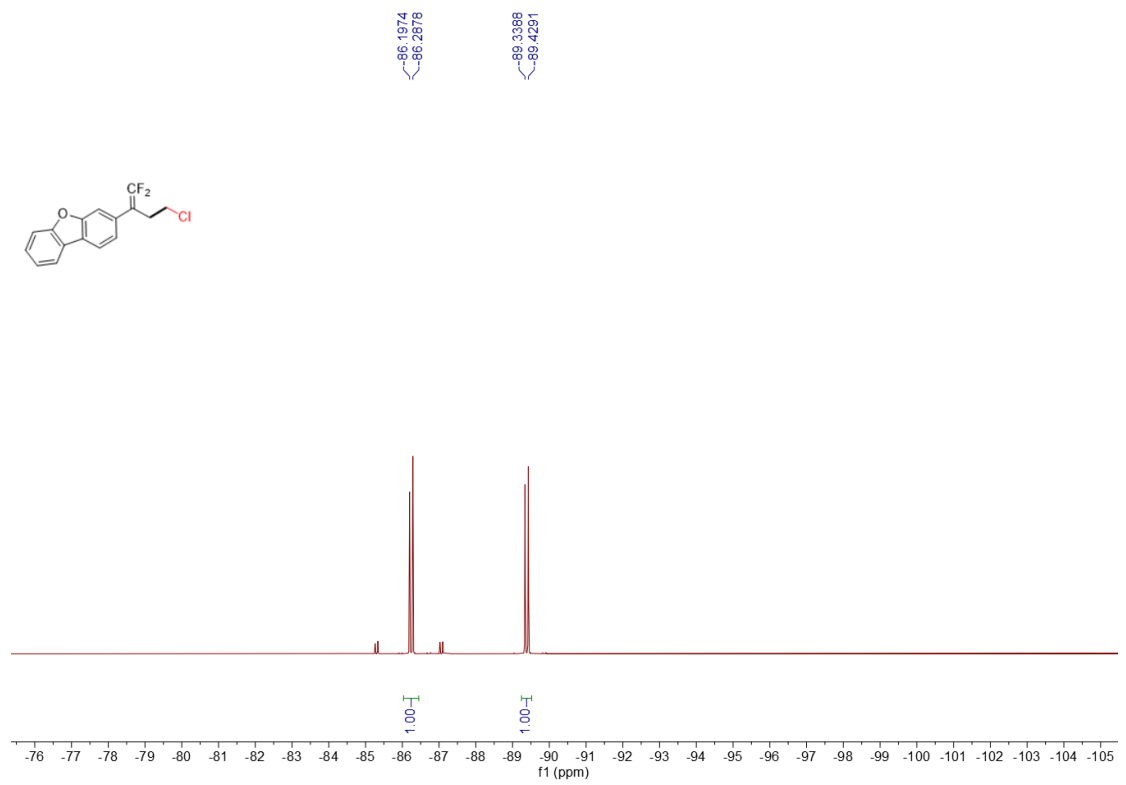

# NMR spectrum of 19

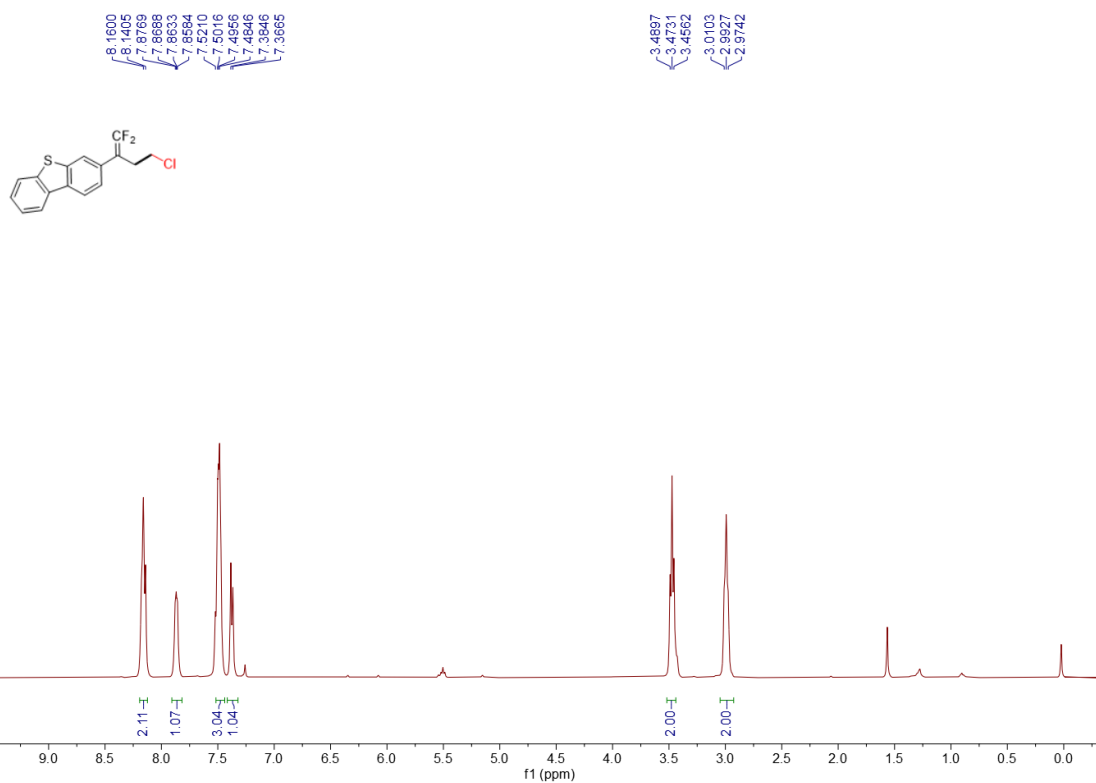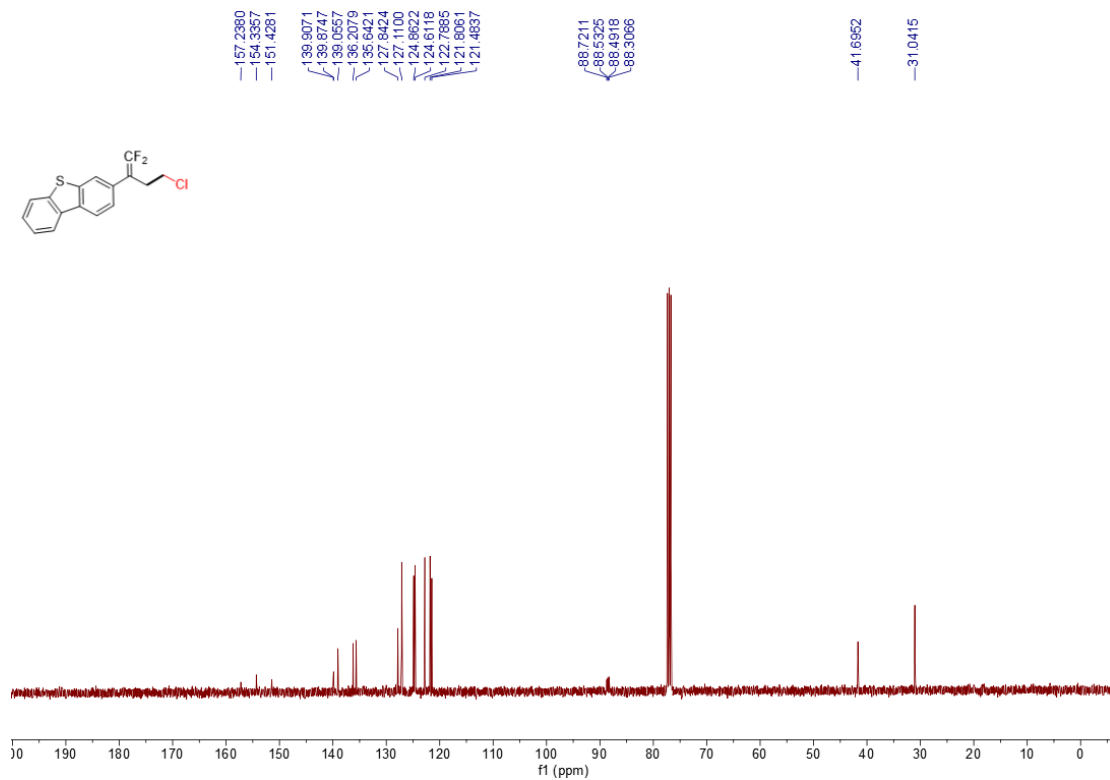

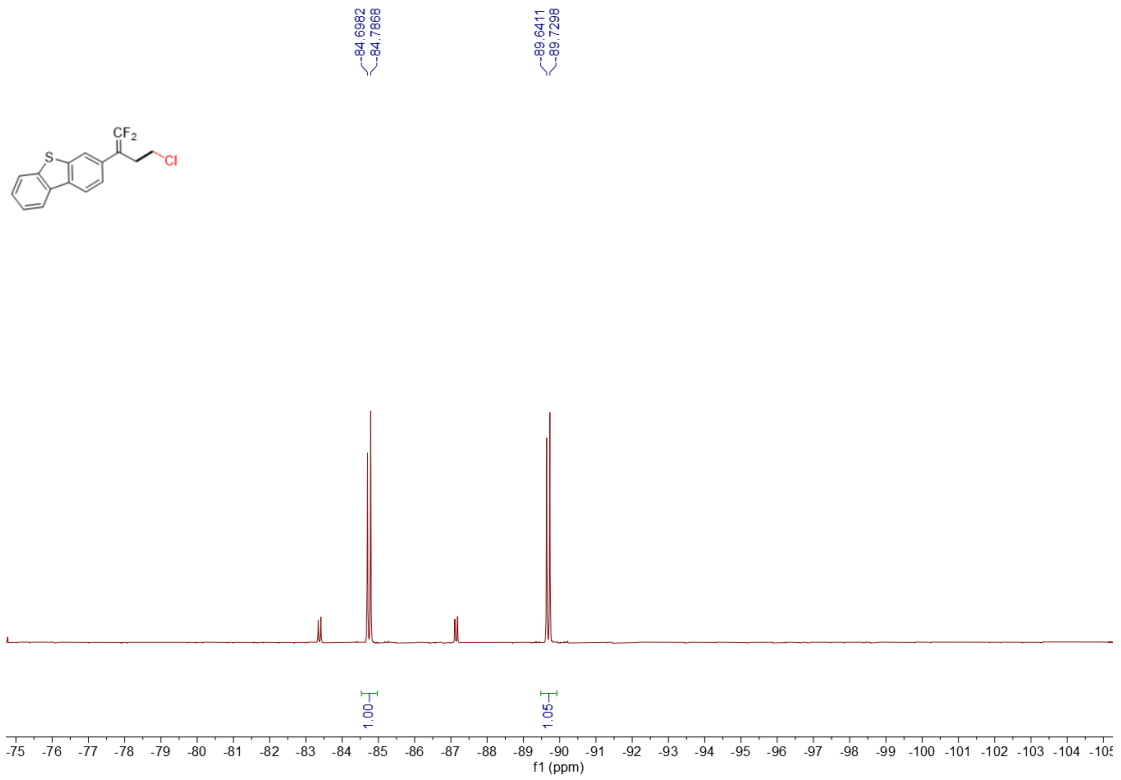

### NMR spectrum of 20

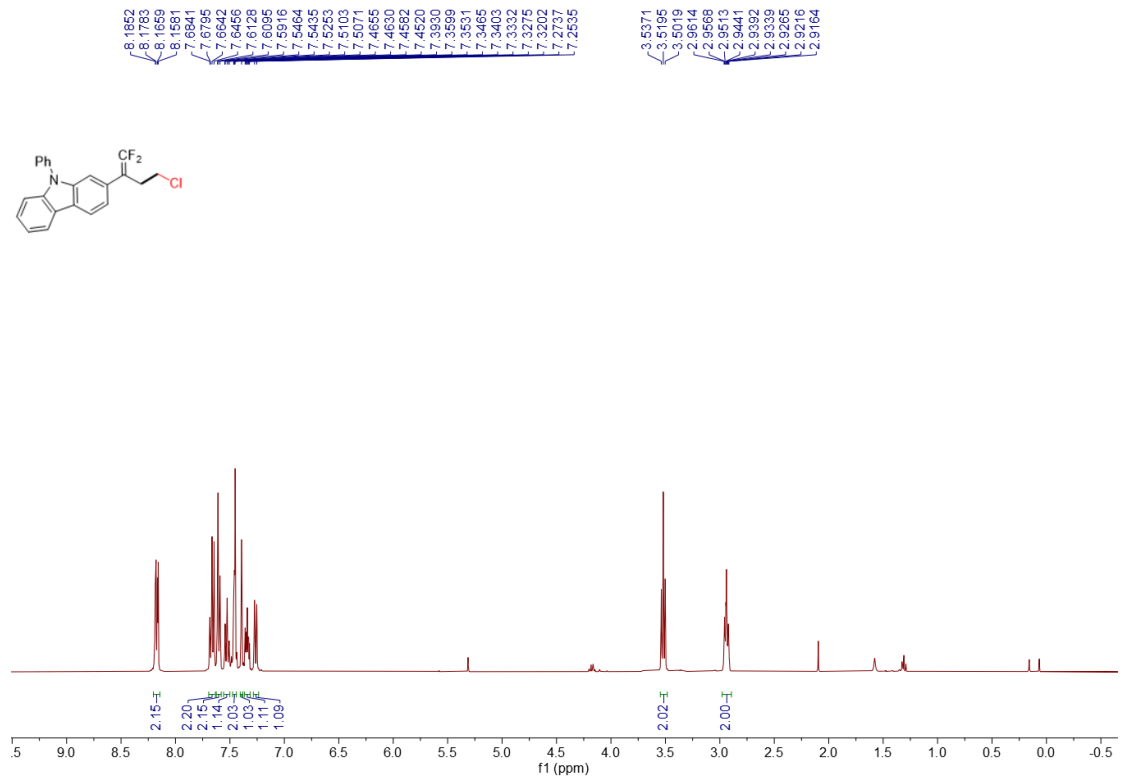

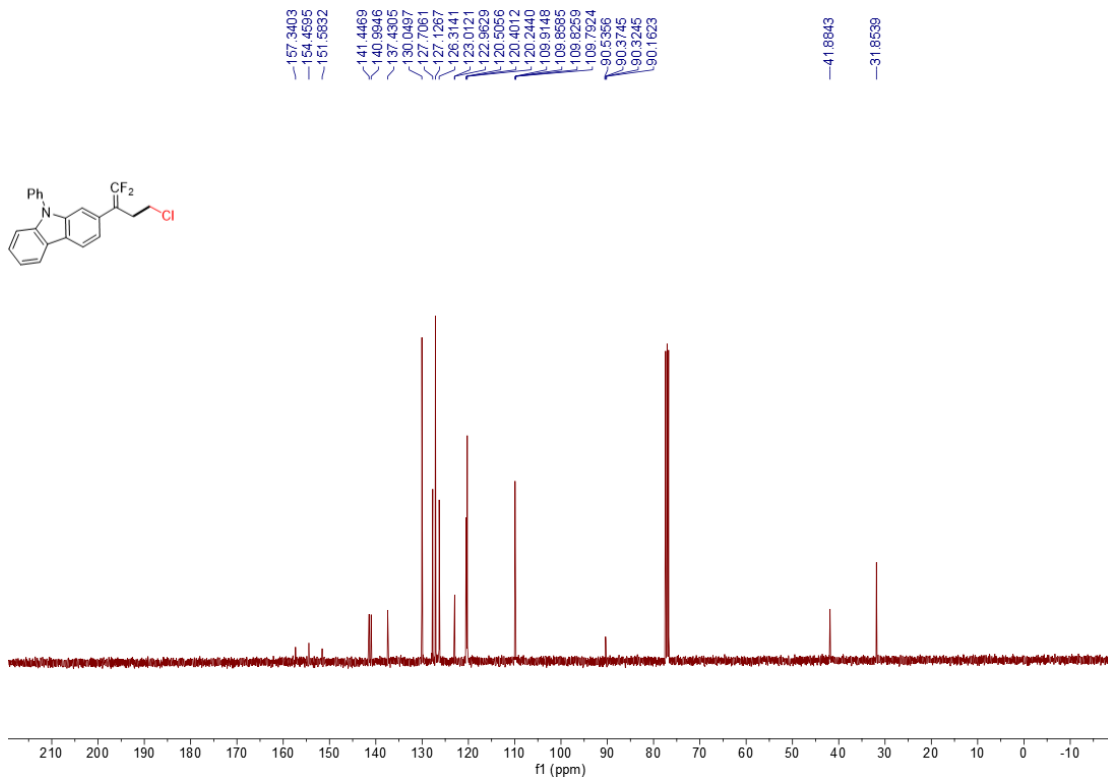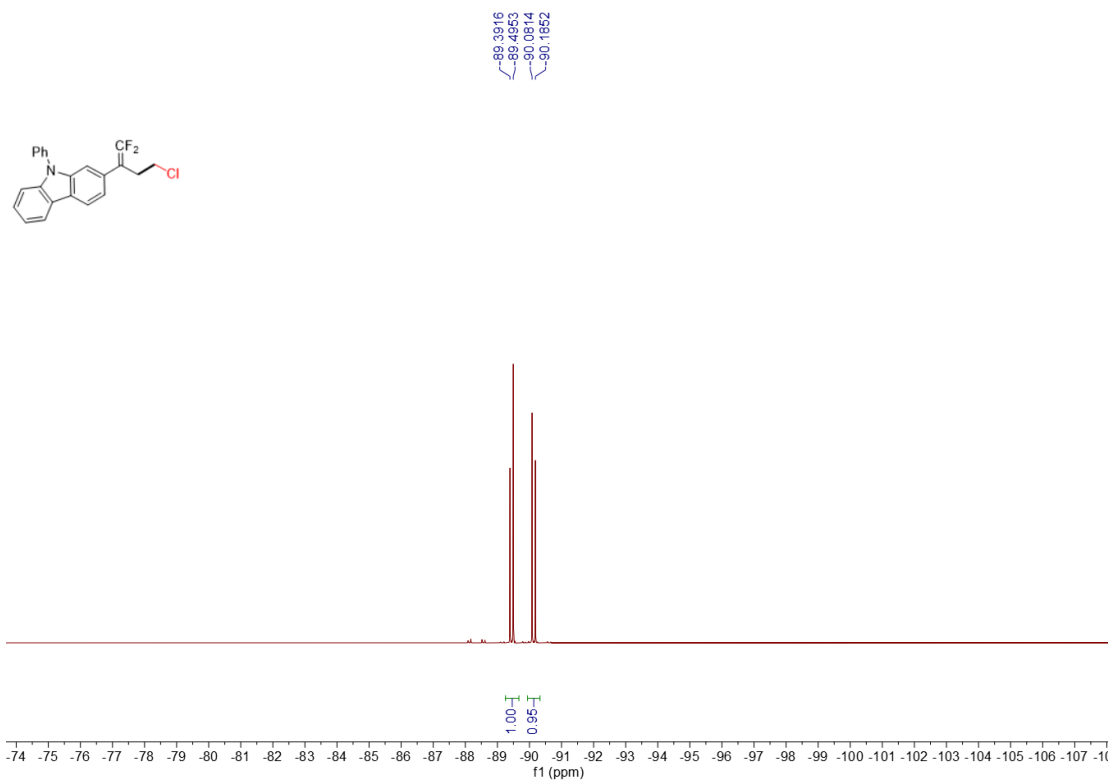

# NMR spectrum of 21

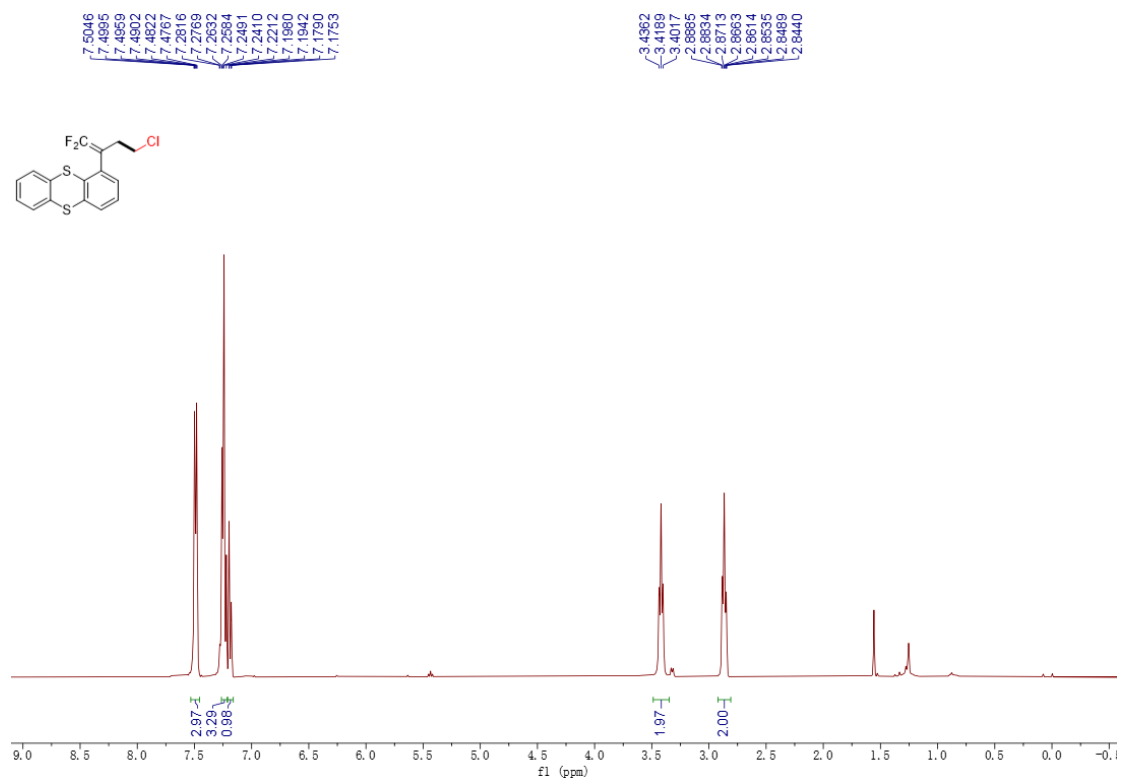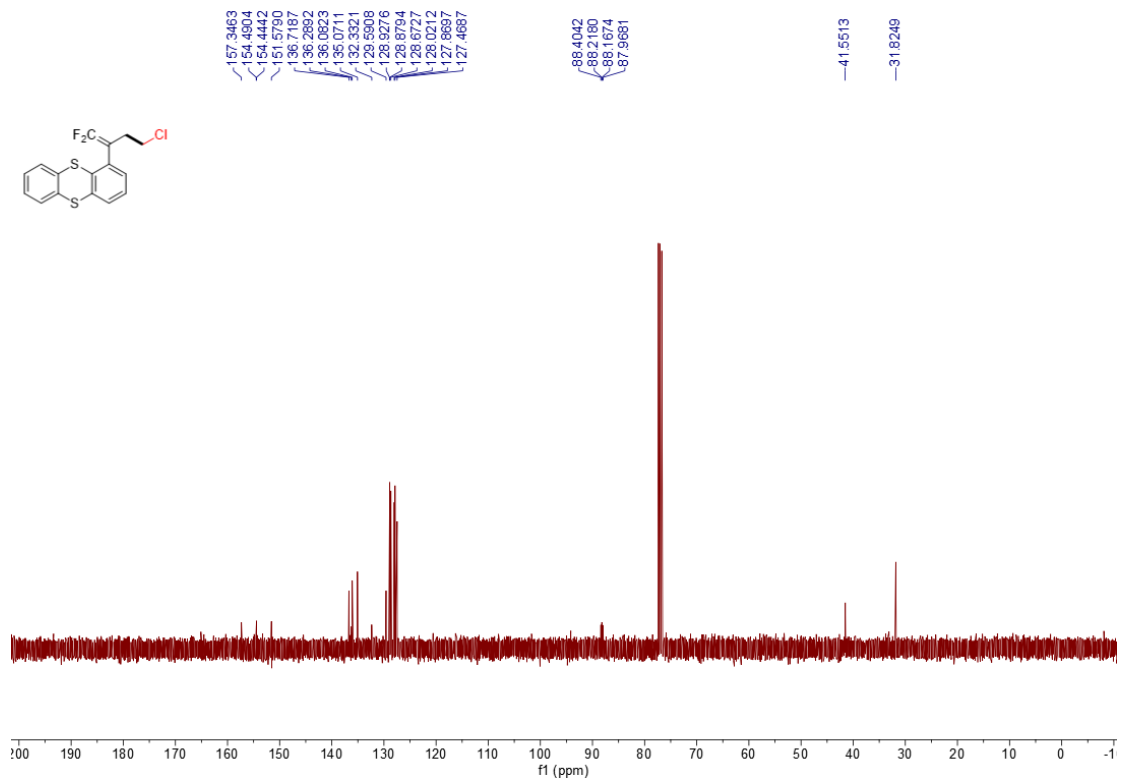

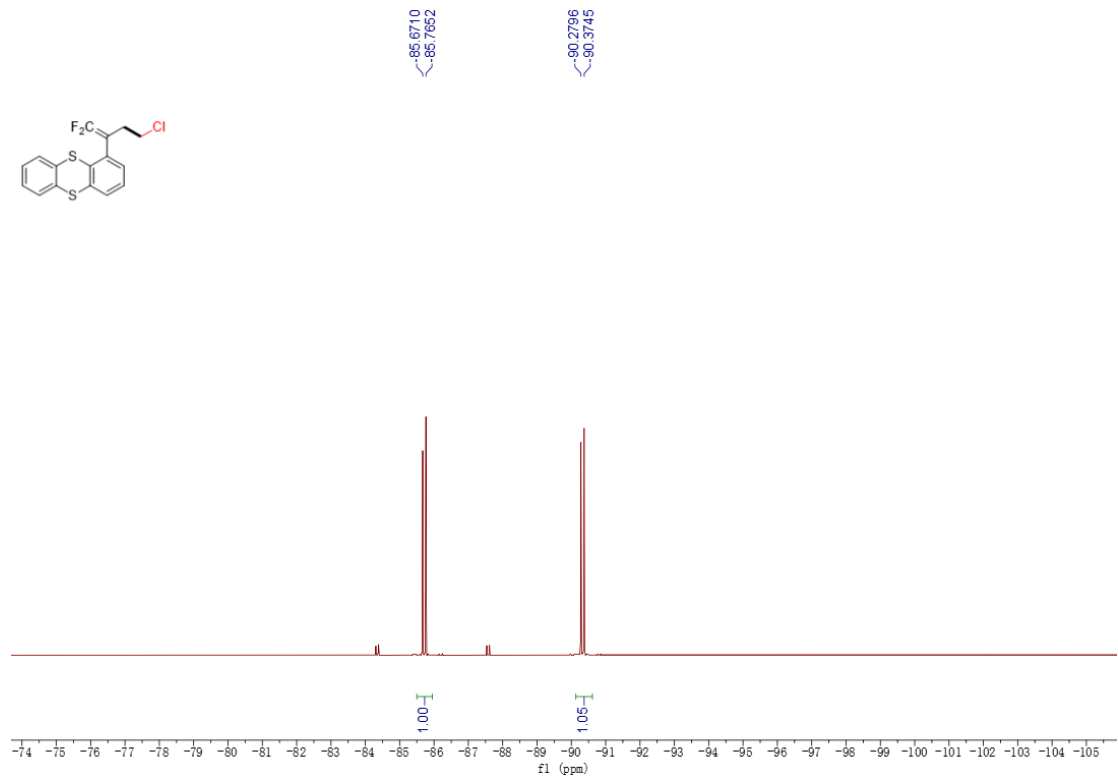

### NMR spectrum of 22

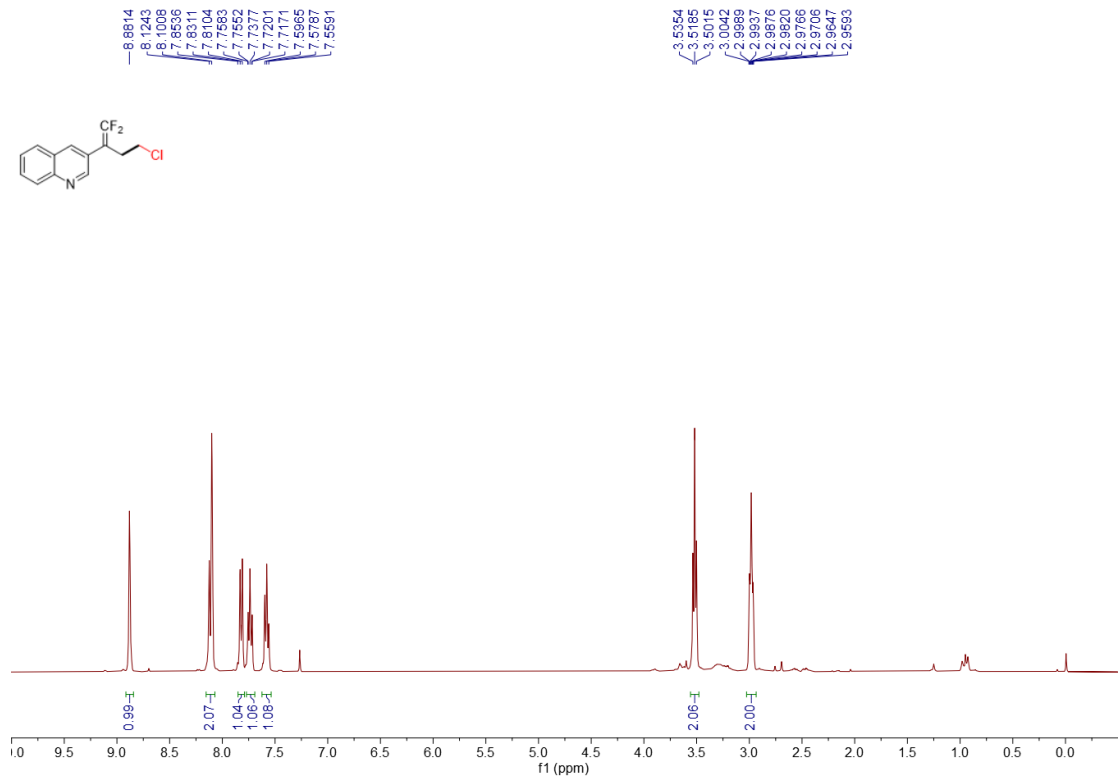

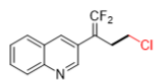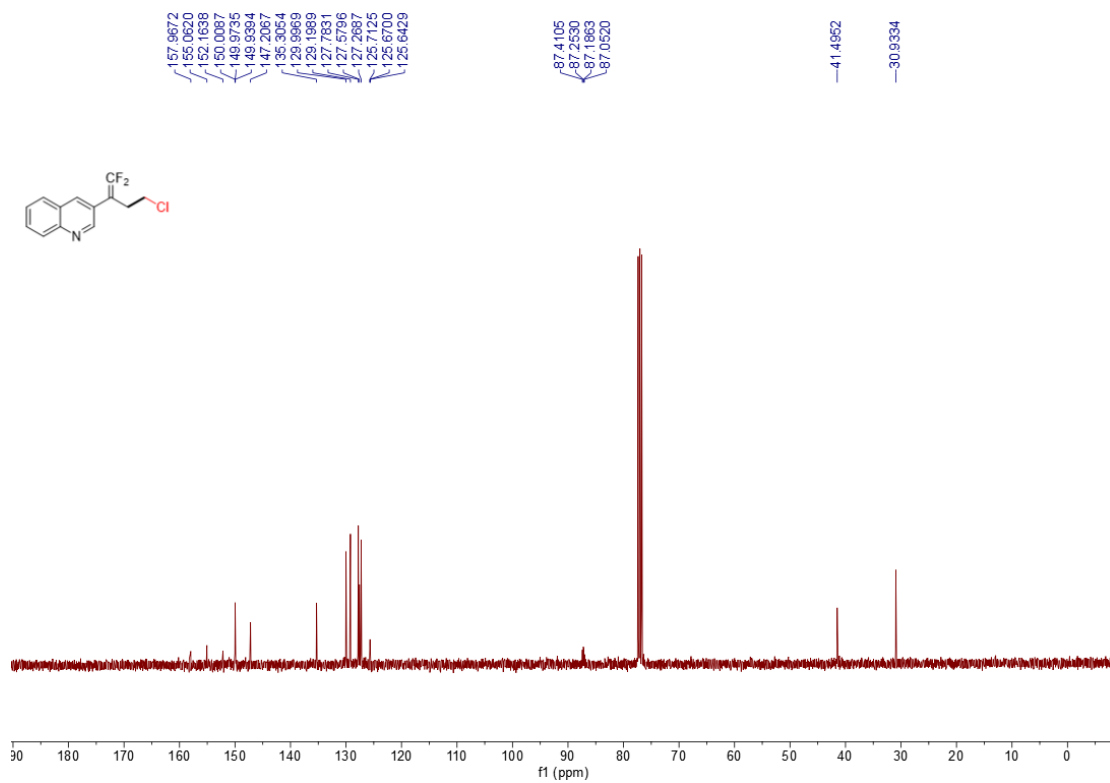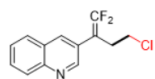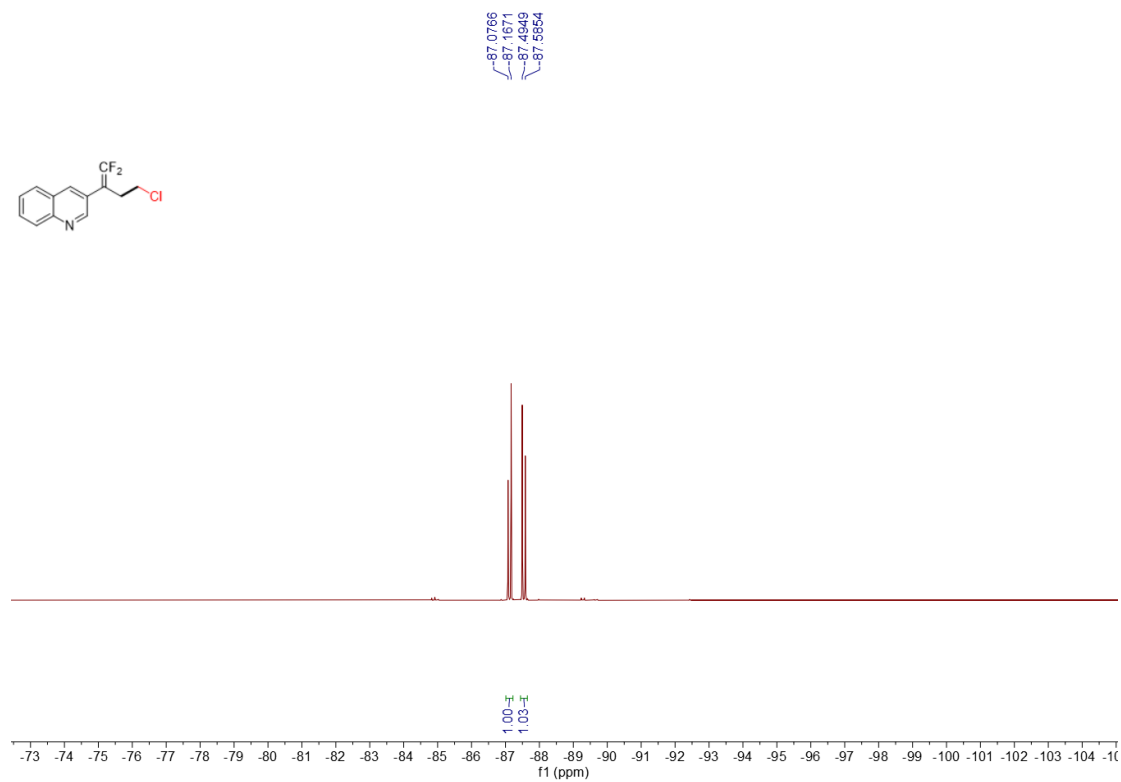

# NMR spectrum of 23

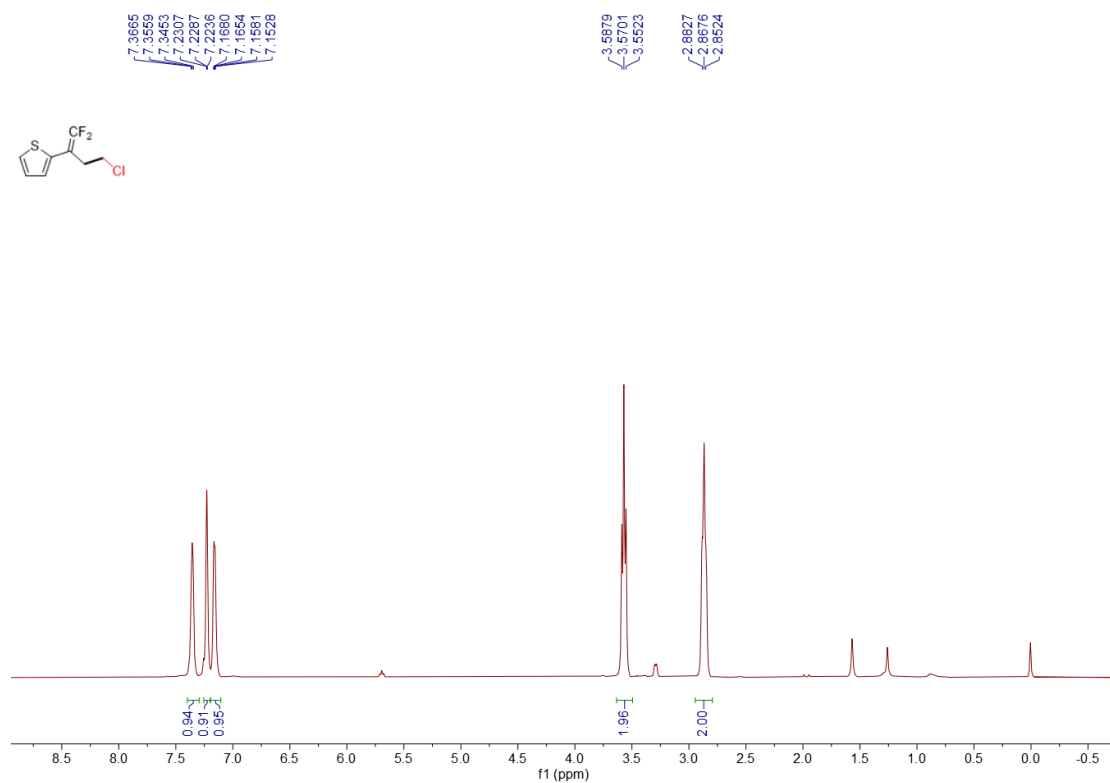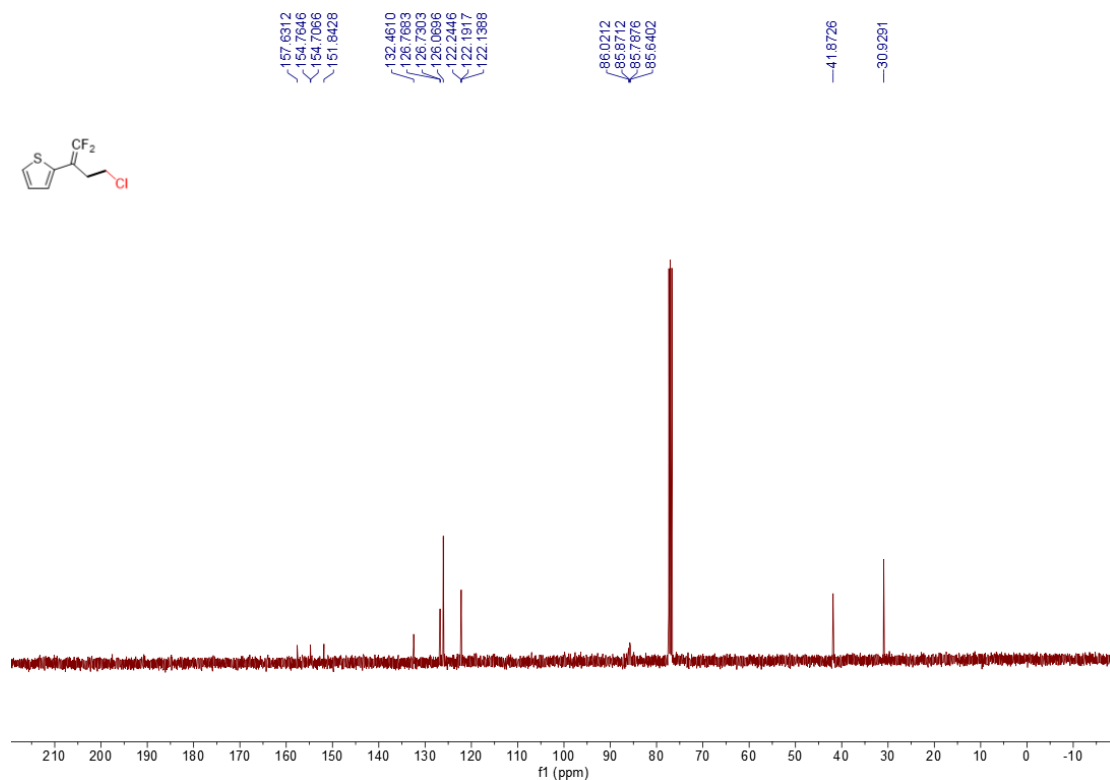



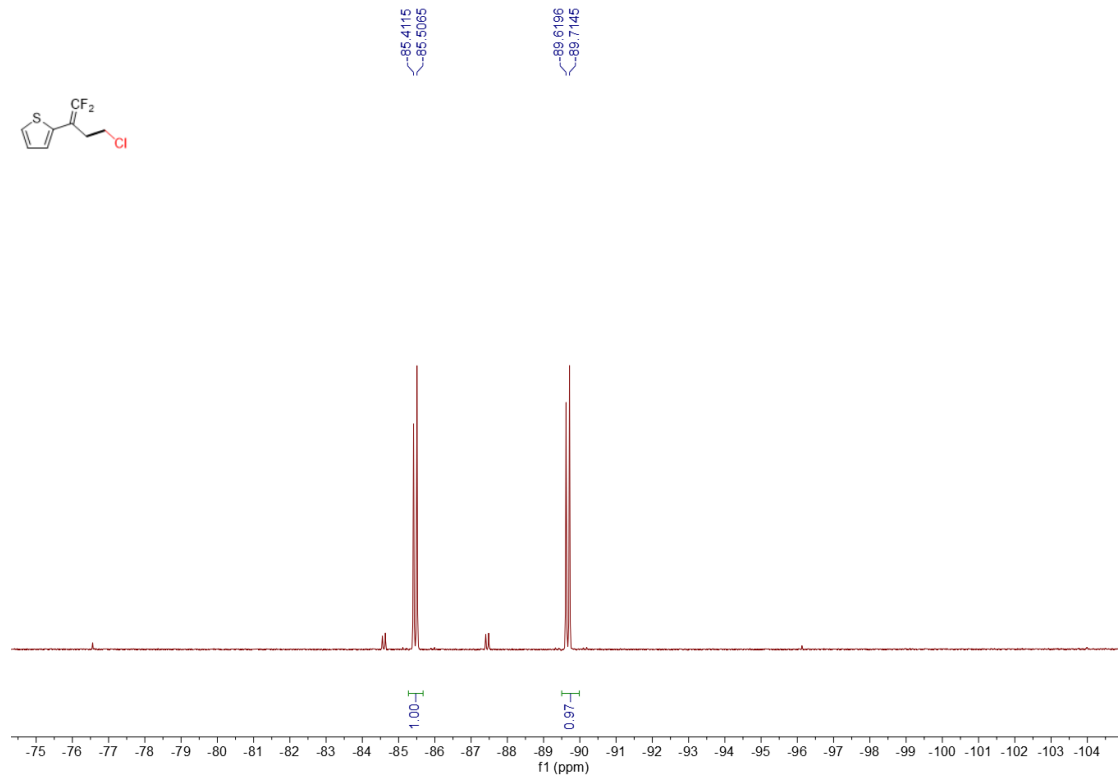

### NMR spectrum of 24

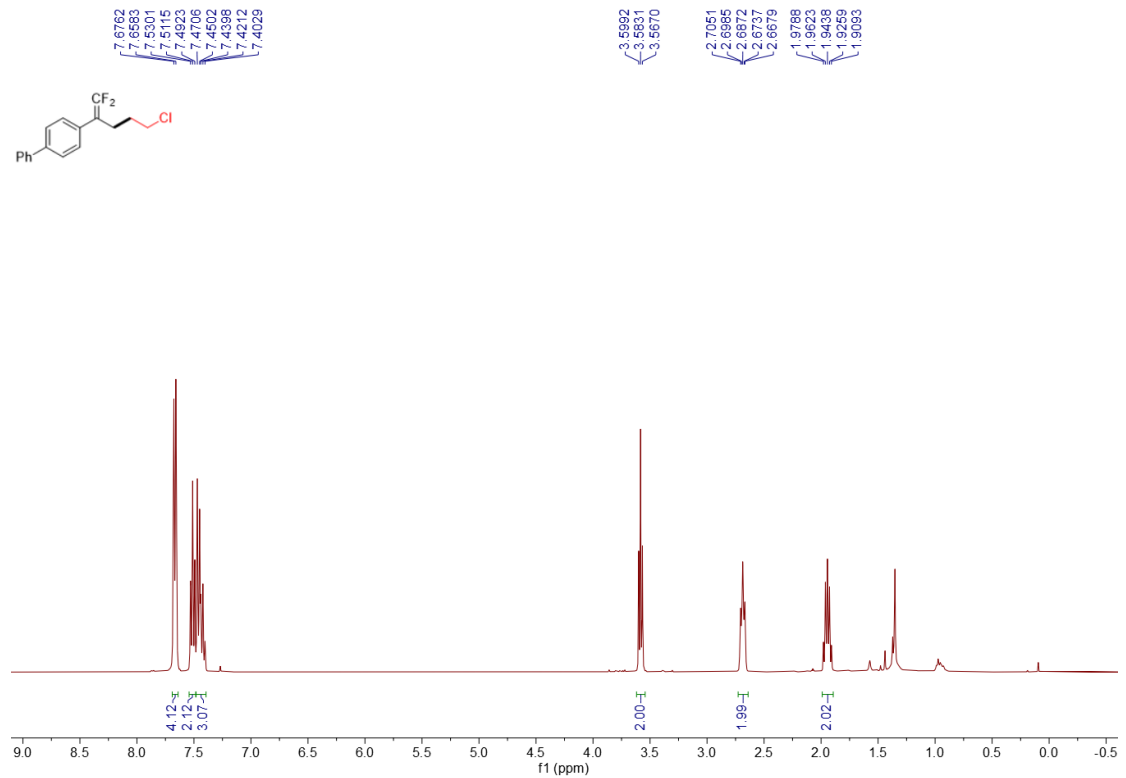



# NMR spectrum of 25

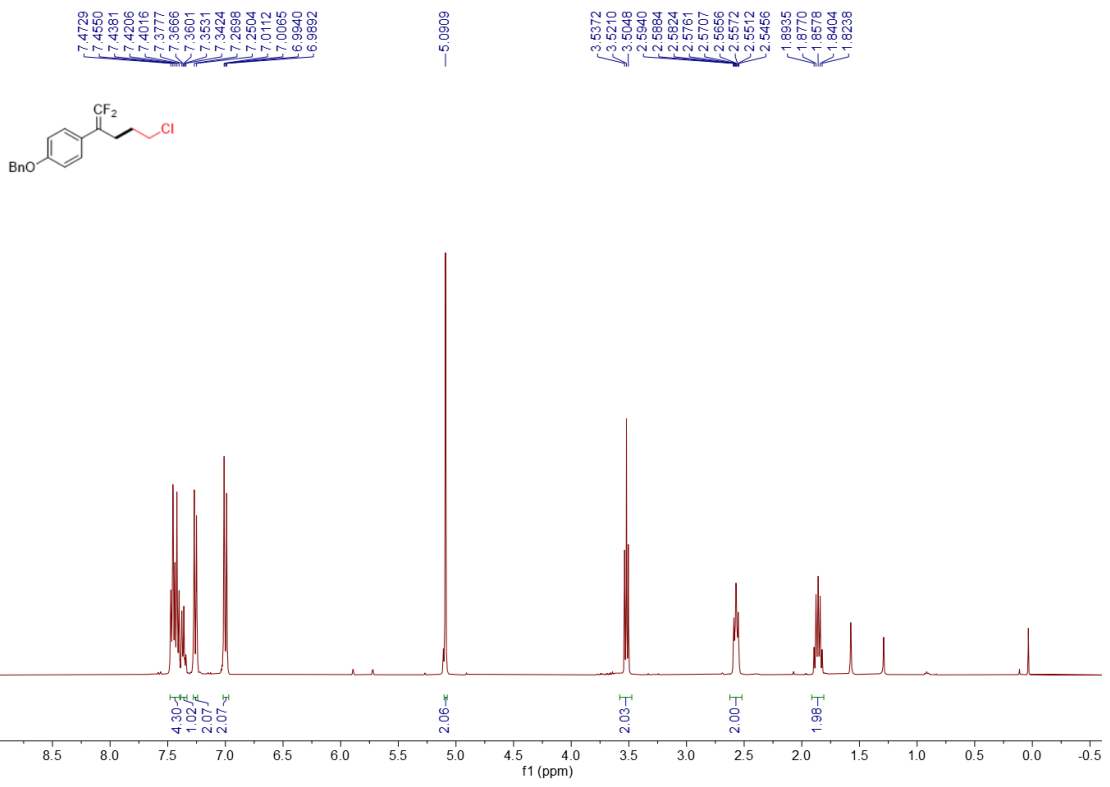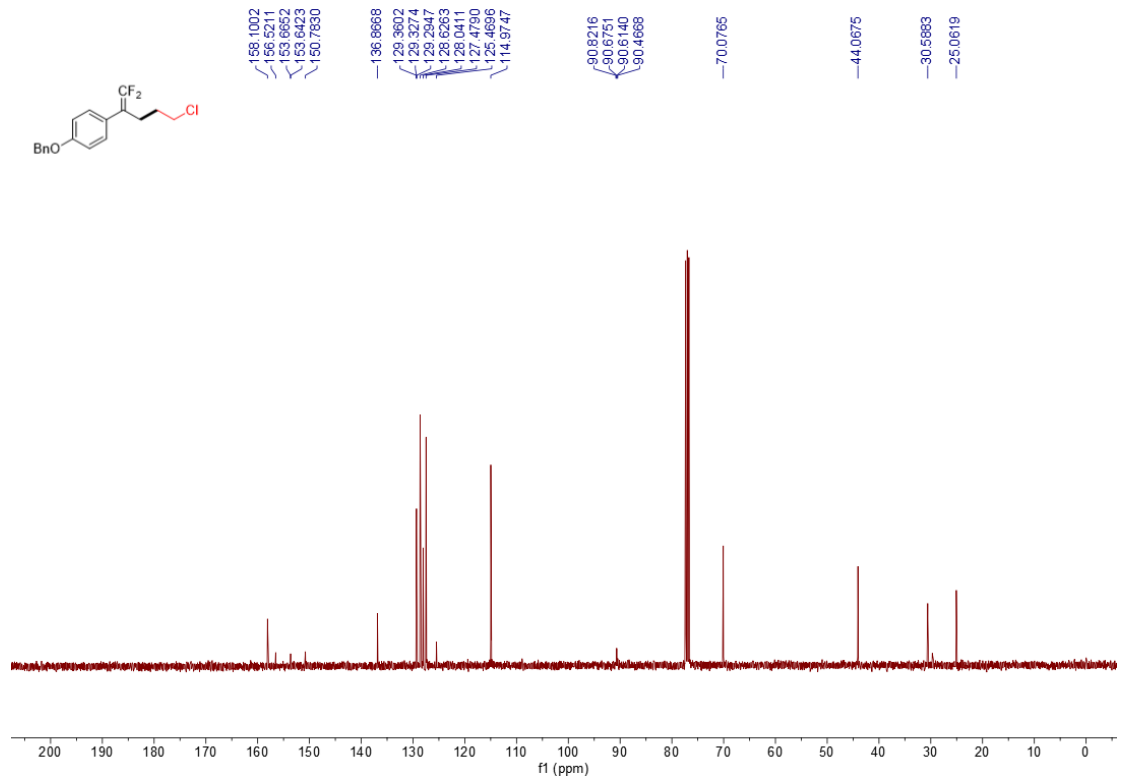

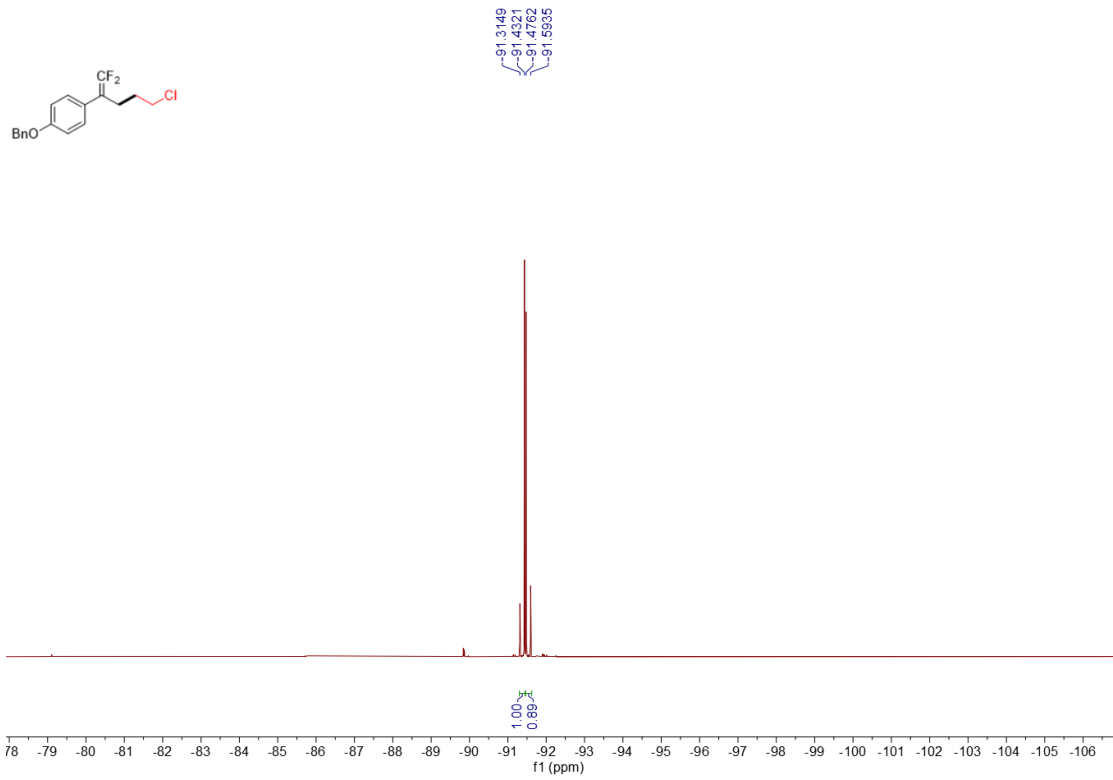

**NMR spectrum of 26**

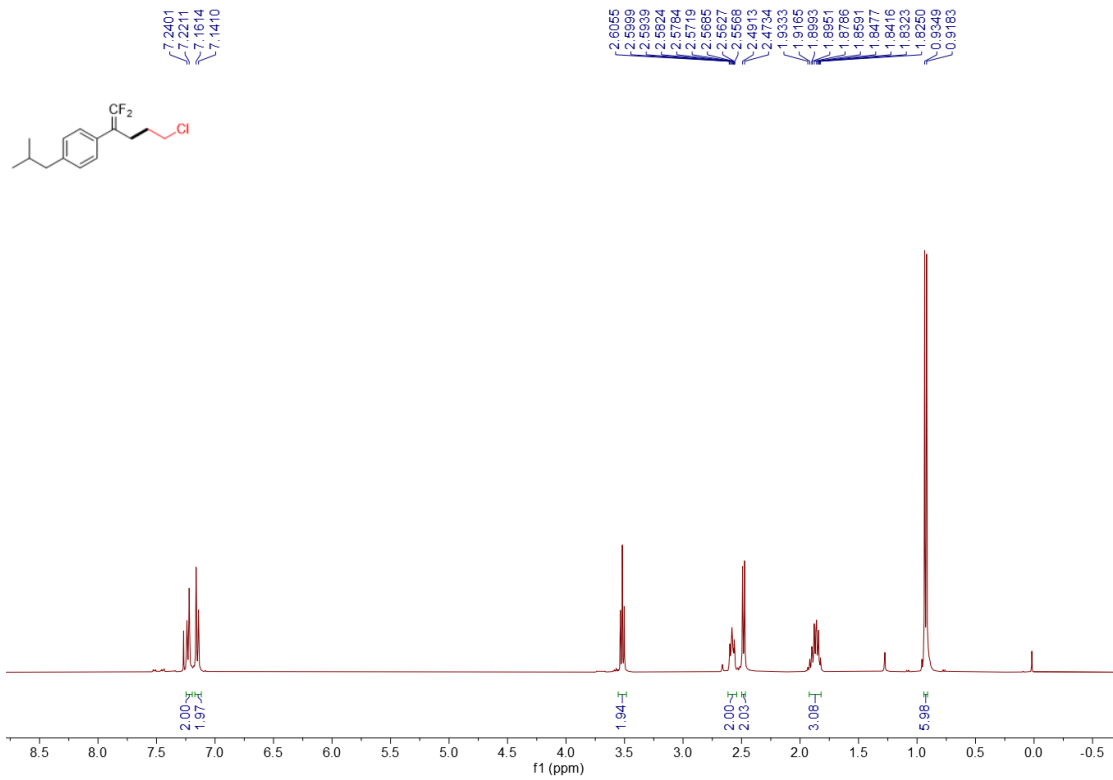

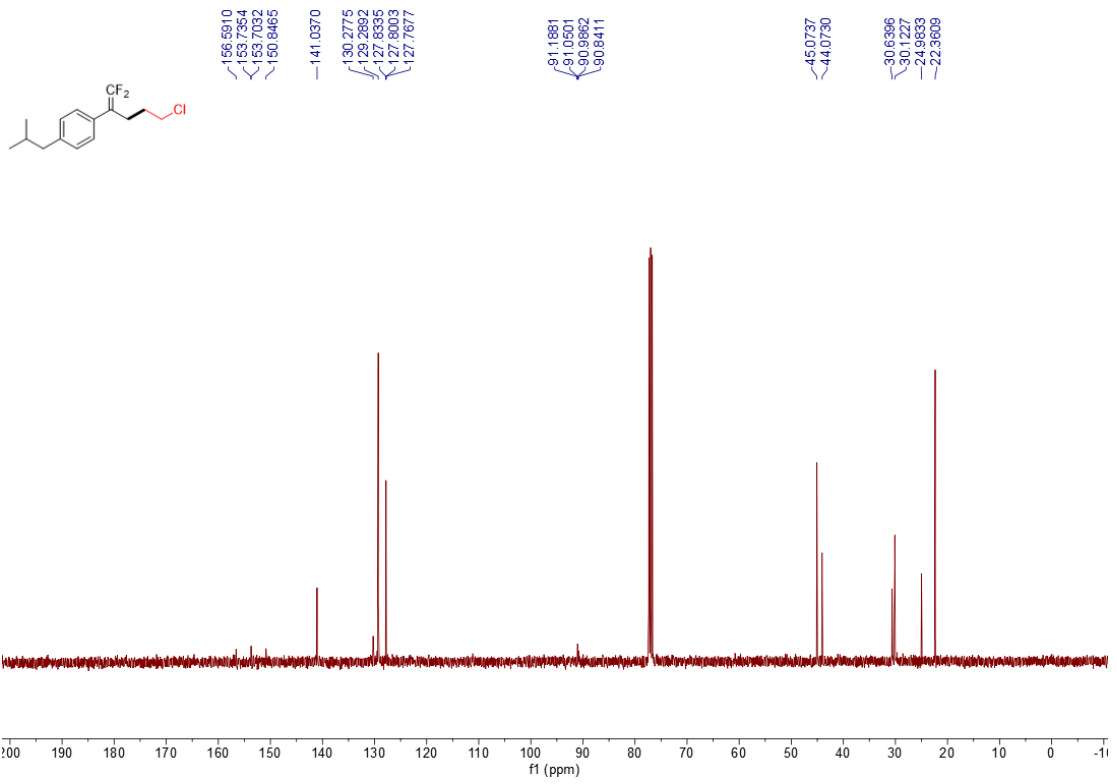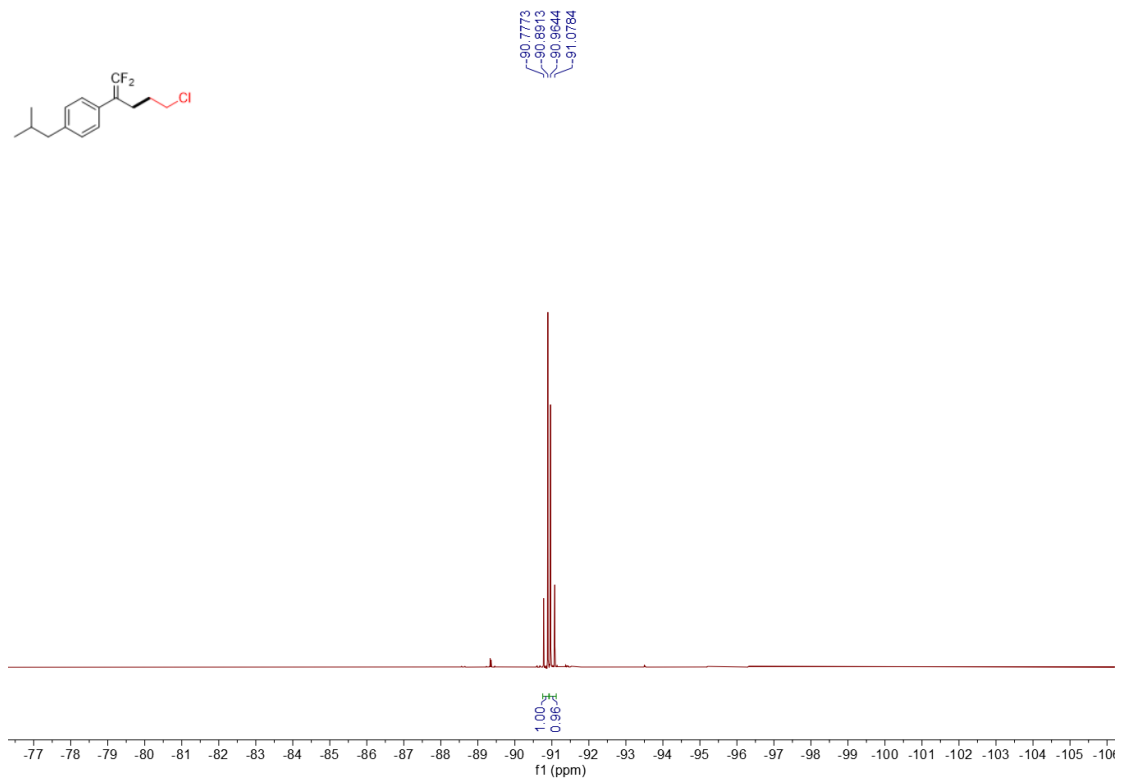

# NMR spectrum of 27

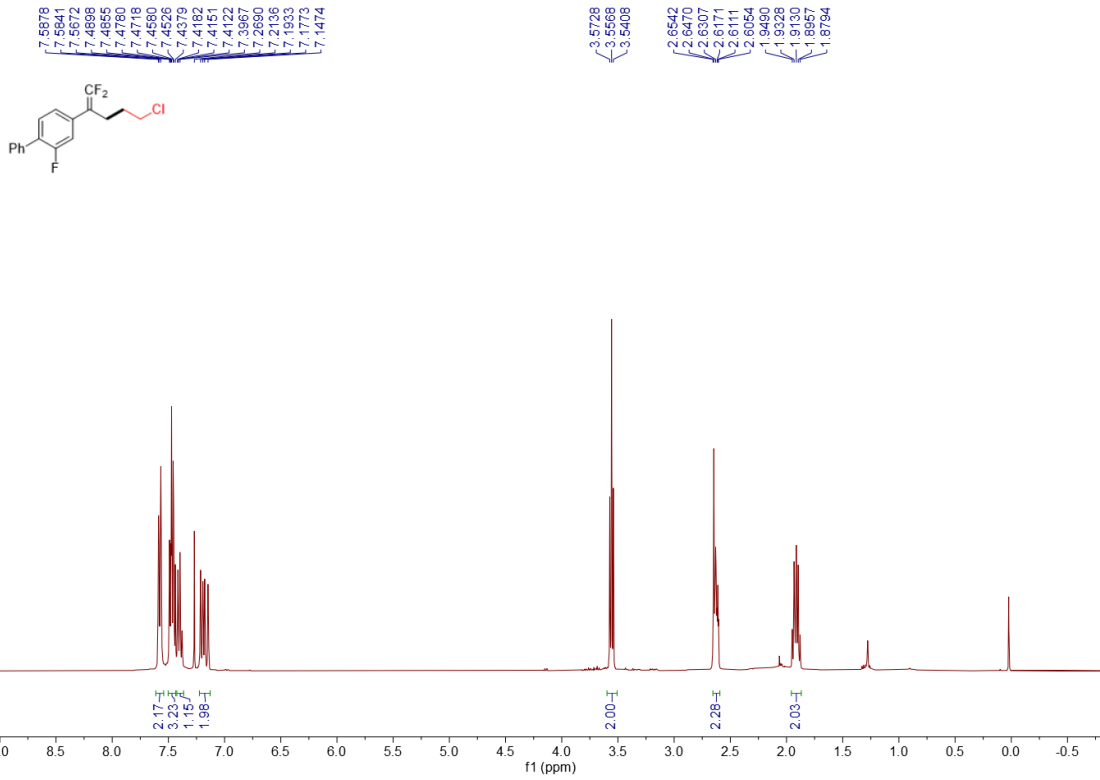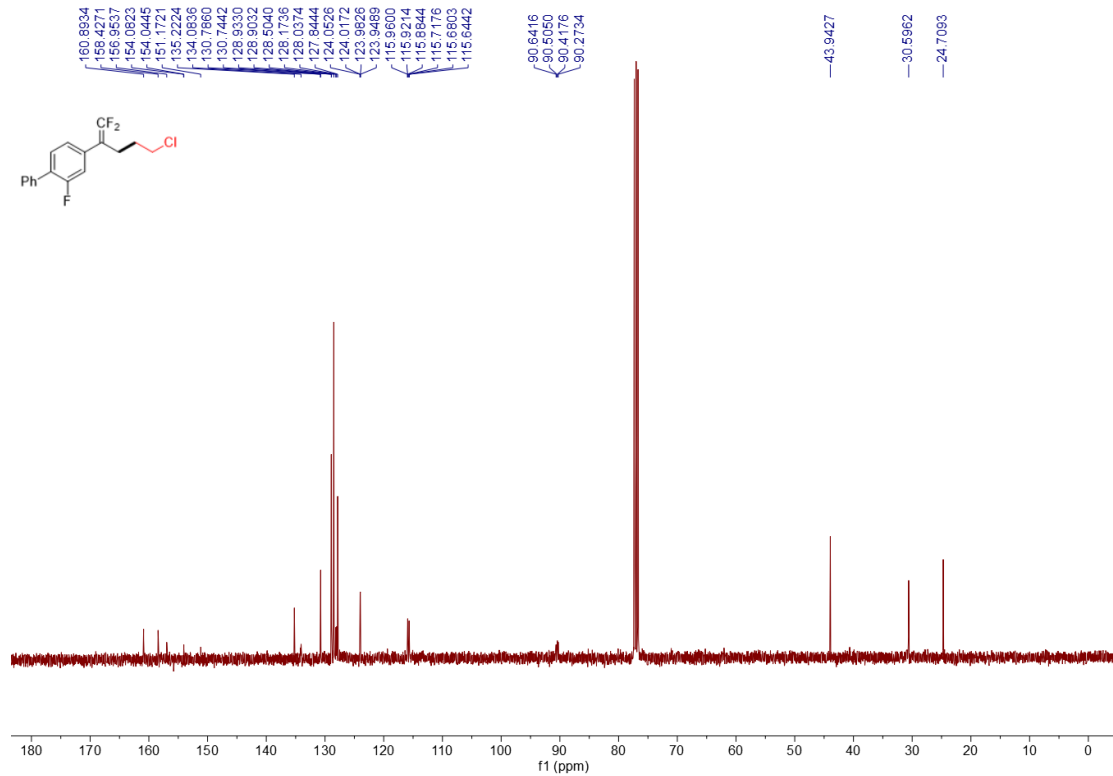

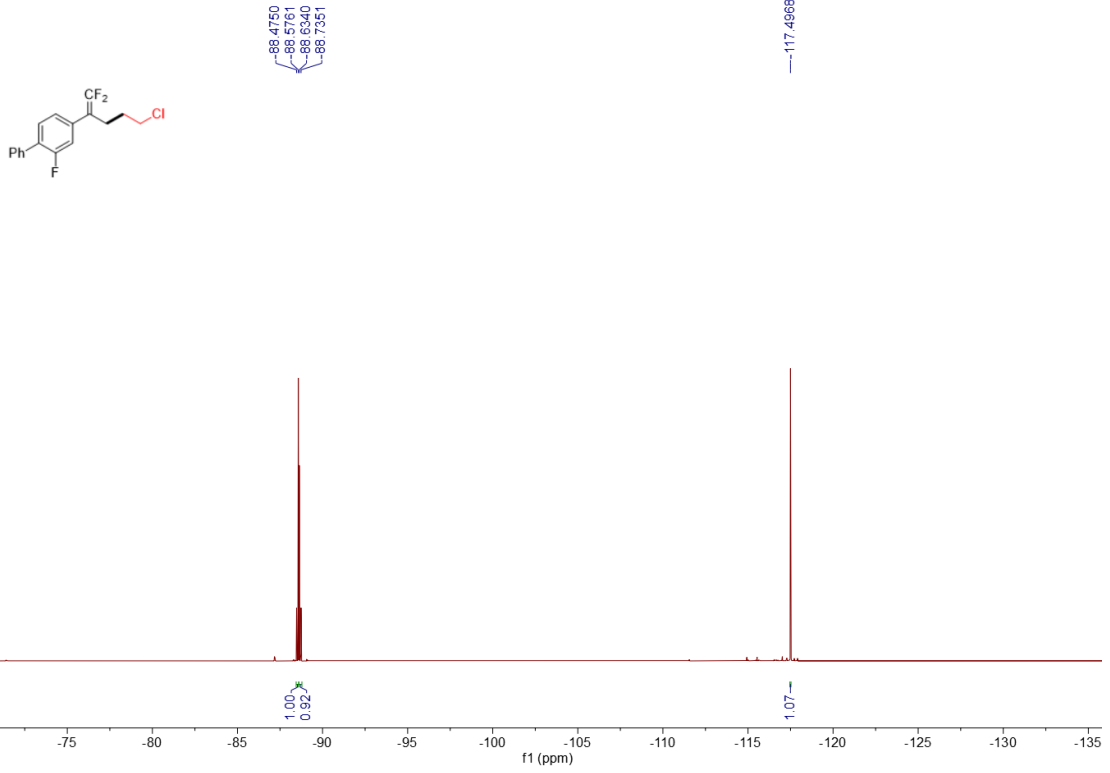

**NMR spectrum of 28**

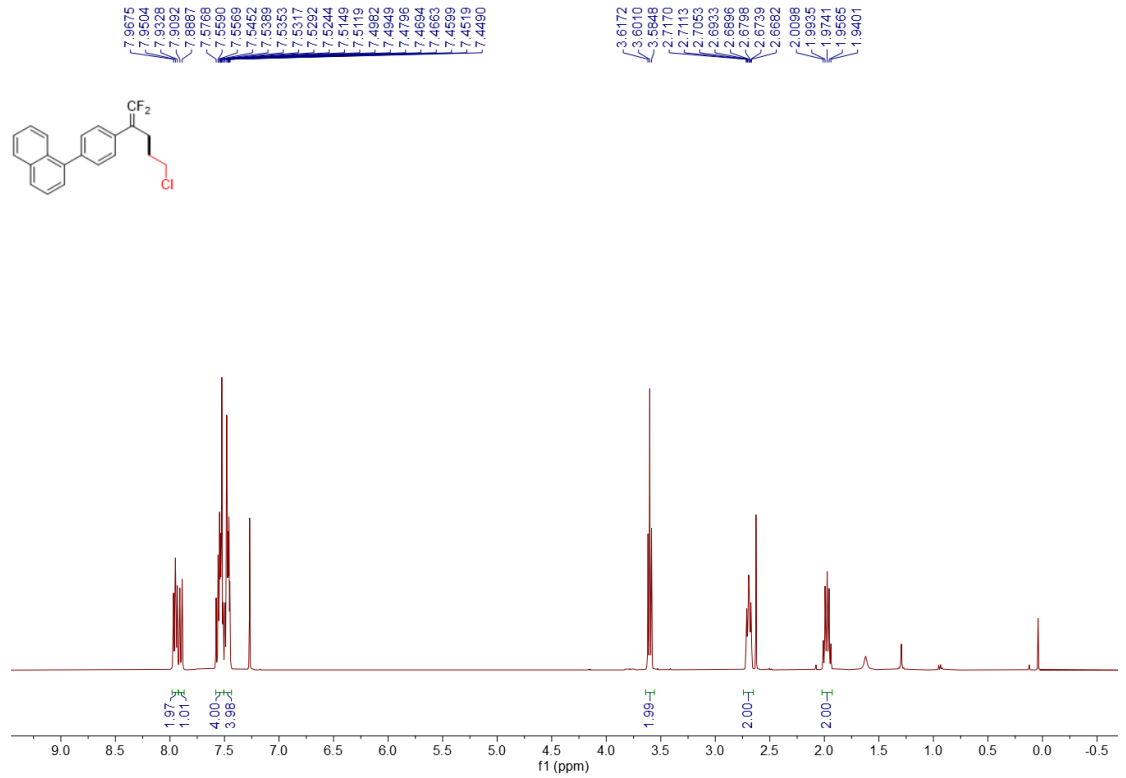

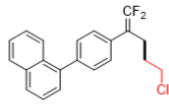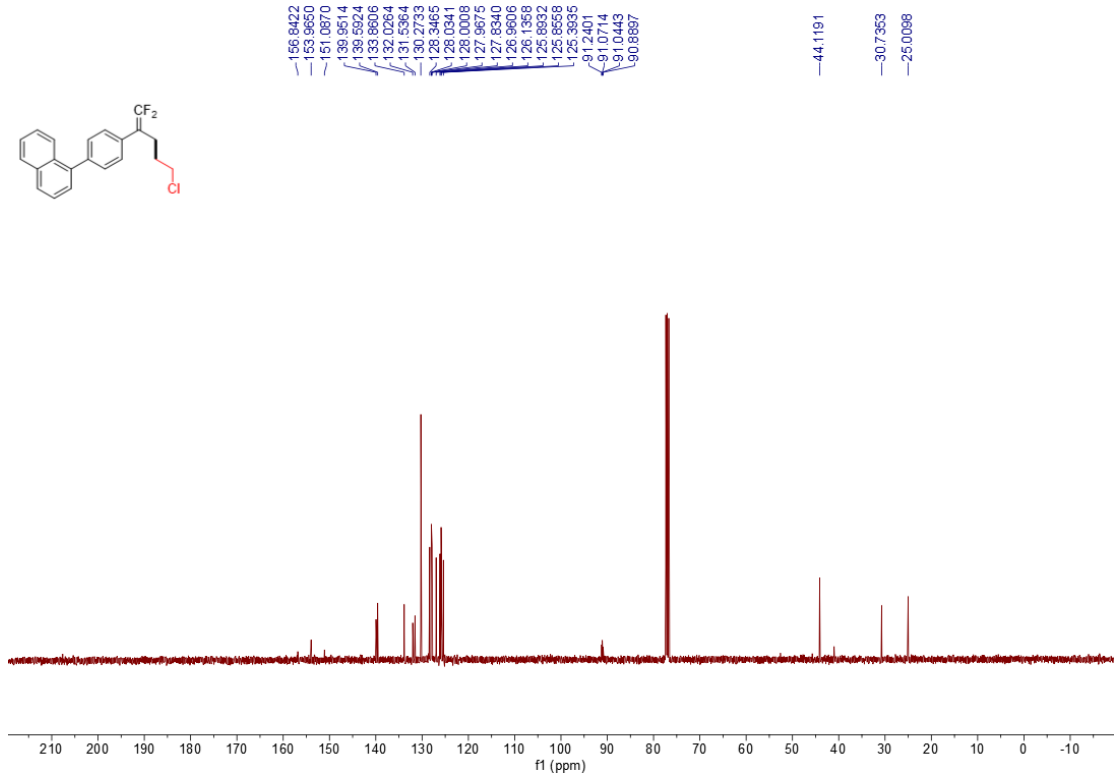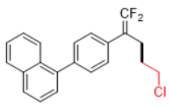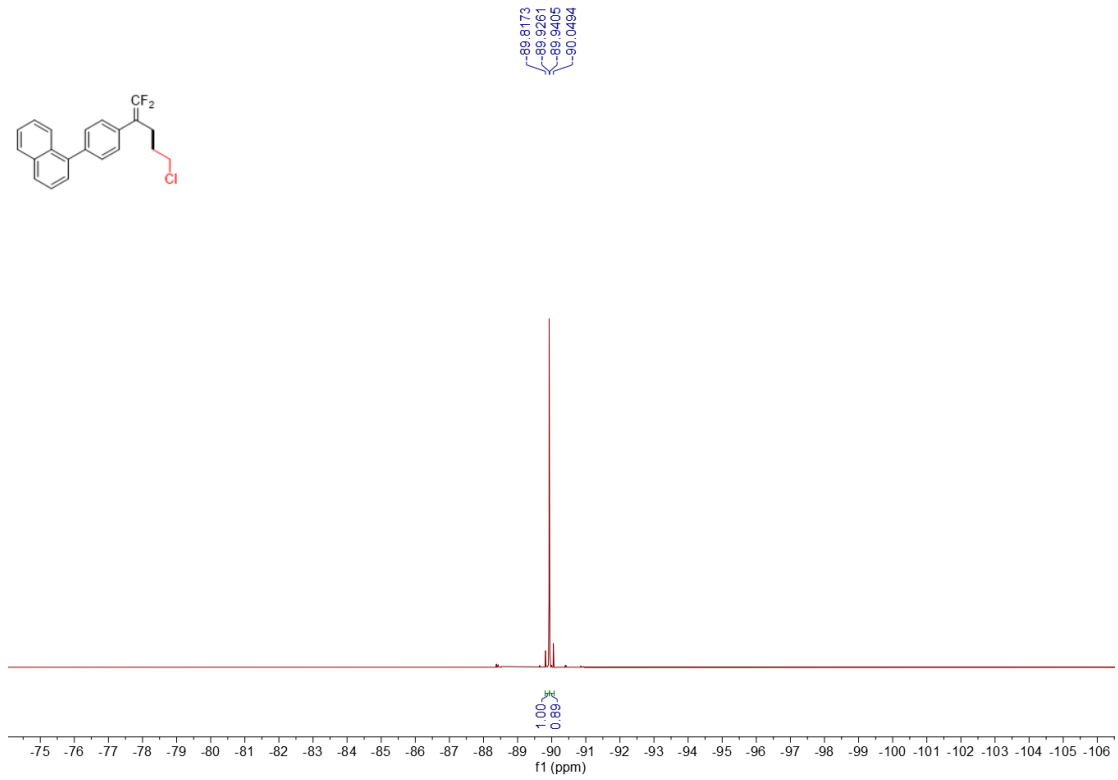



# NMR spectrum of 29

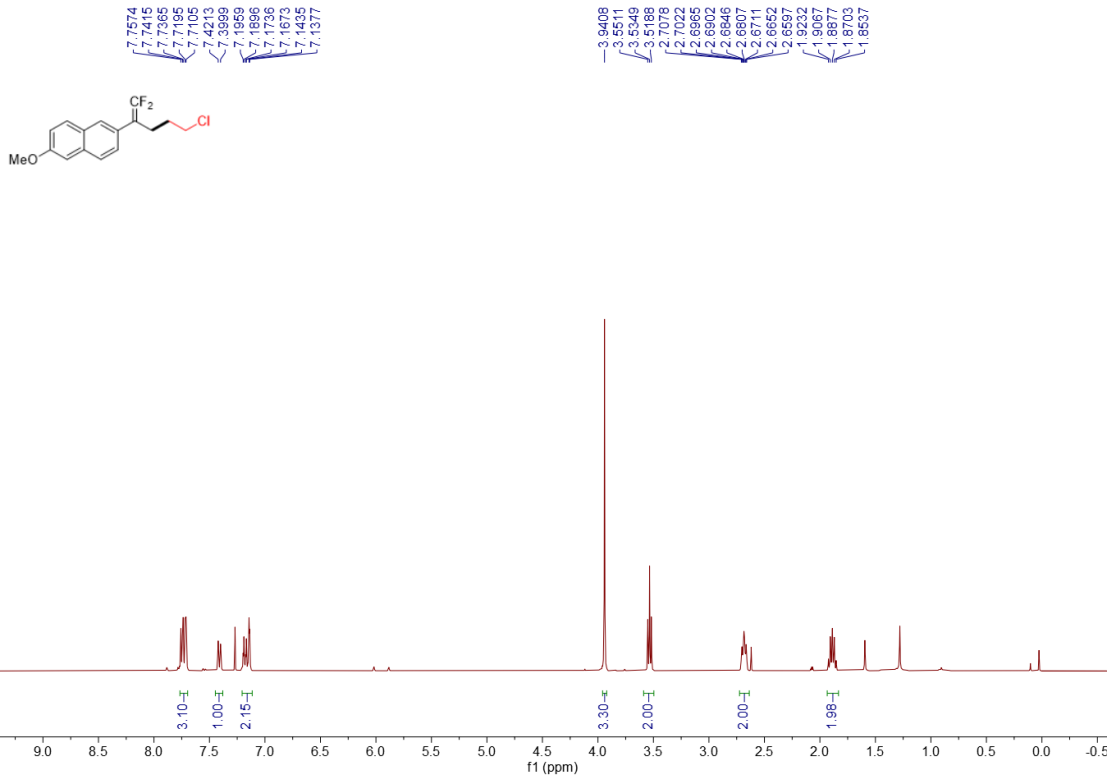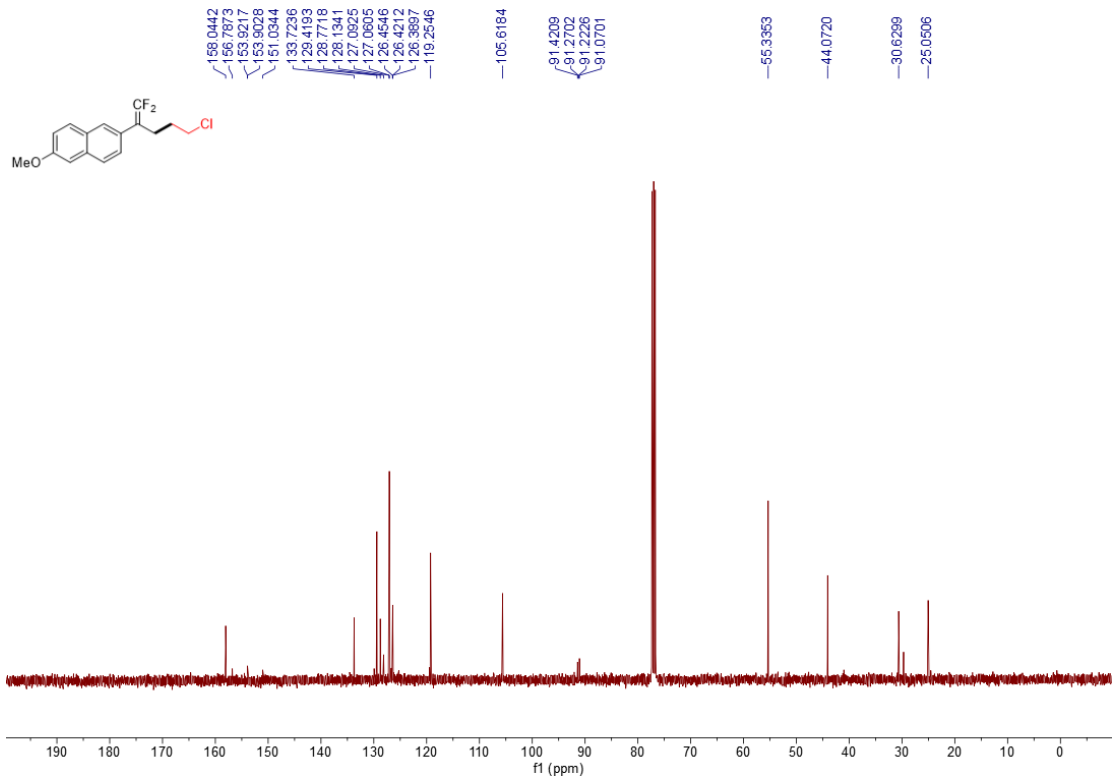

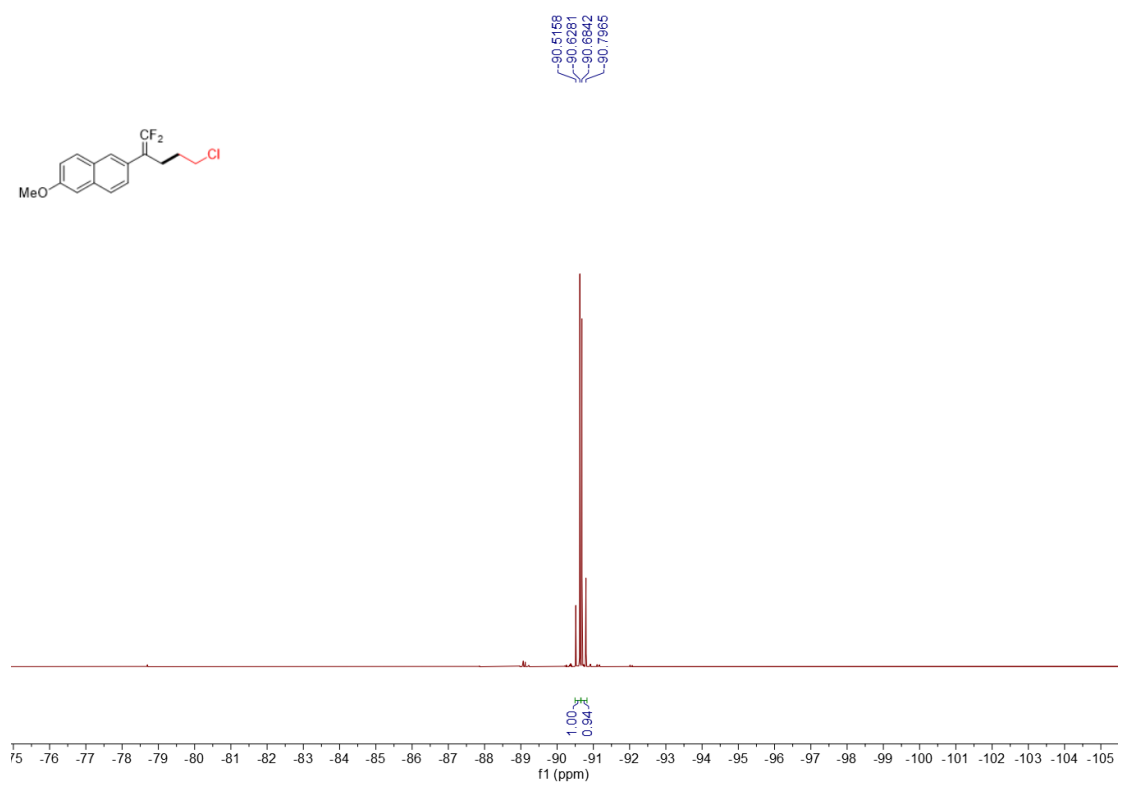

**NMR spectrum of 30**

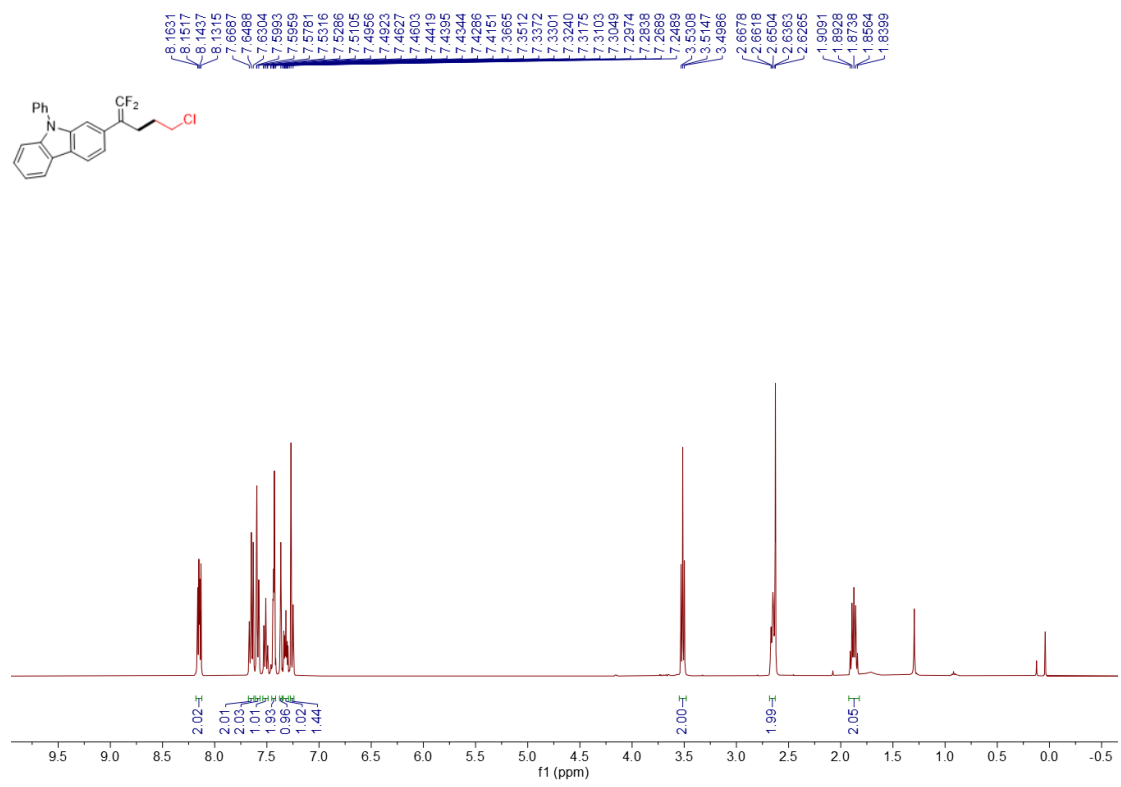

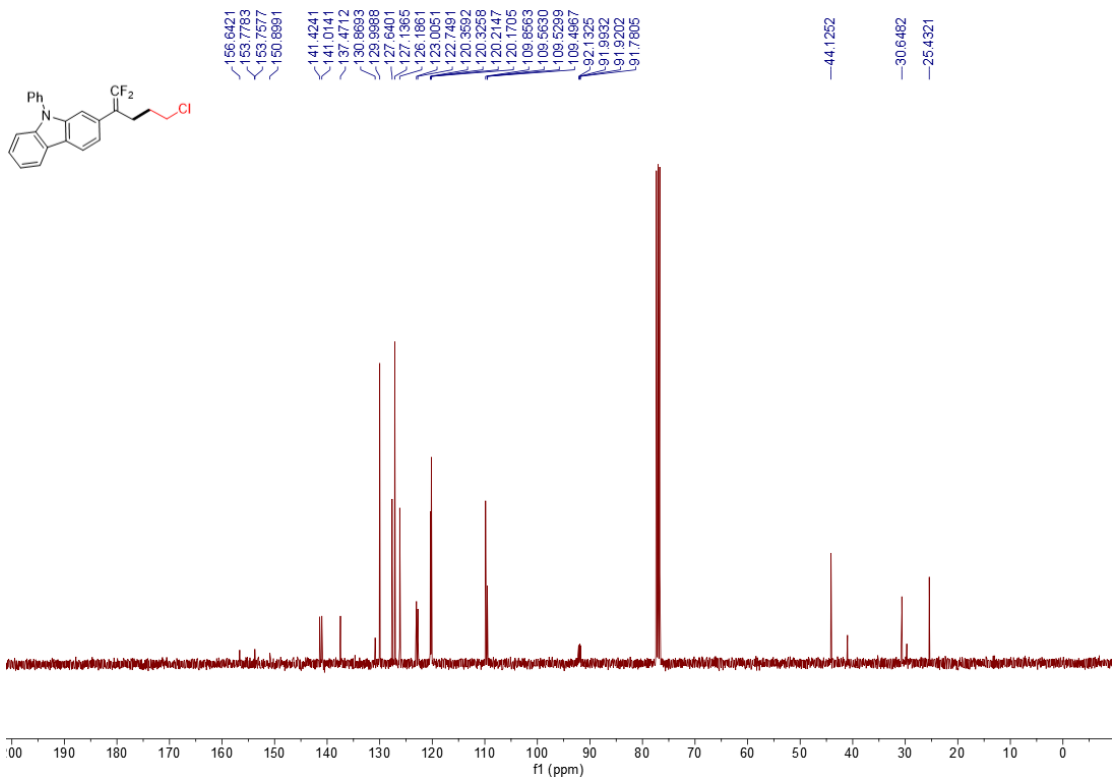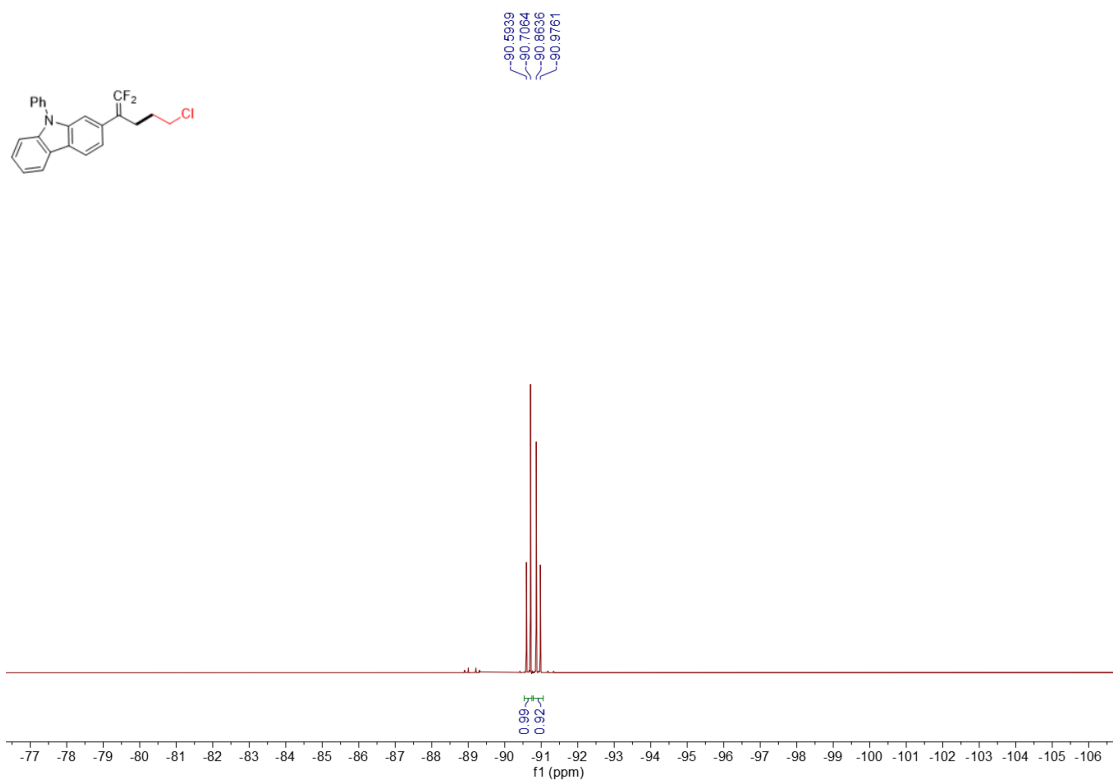

# NMR spectrum of 31

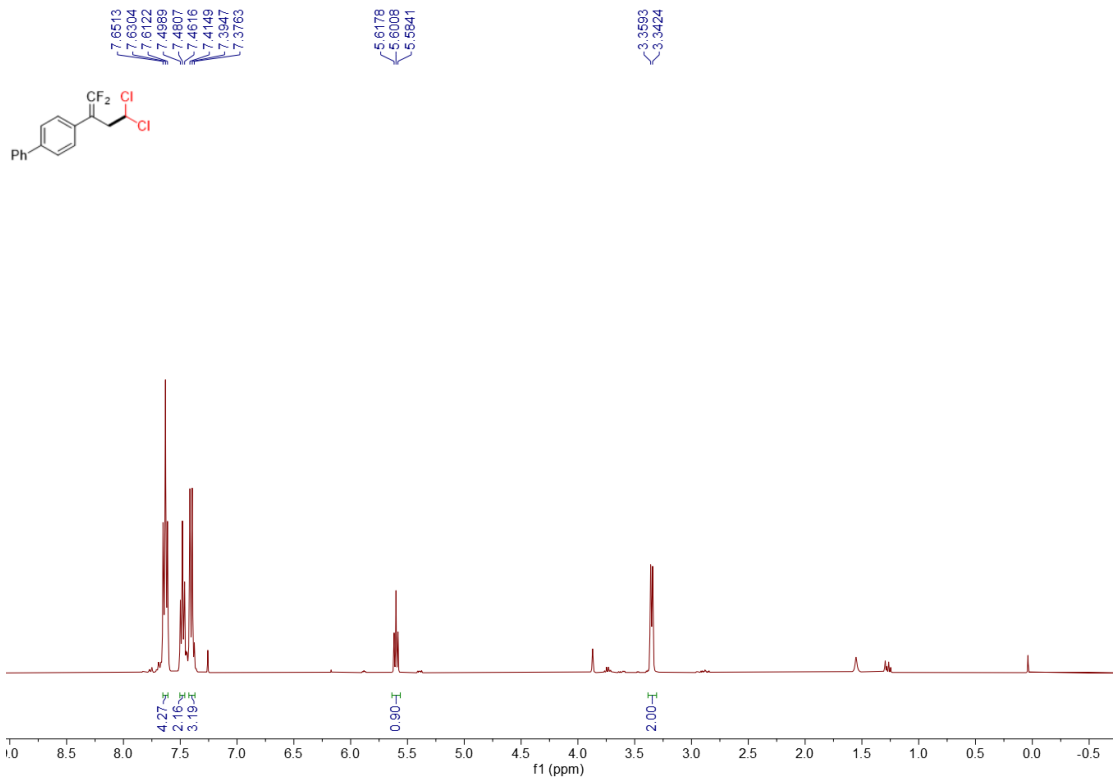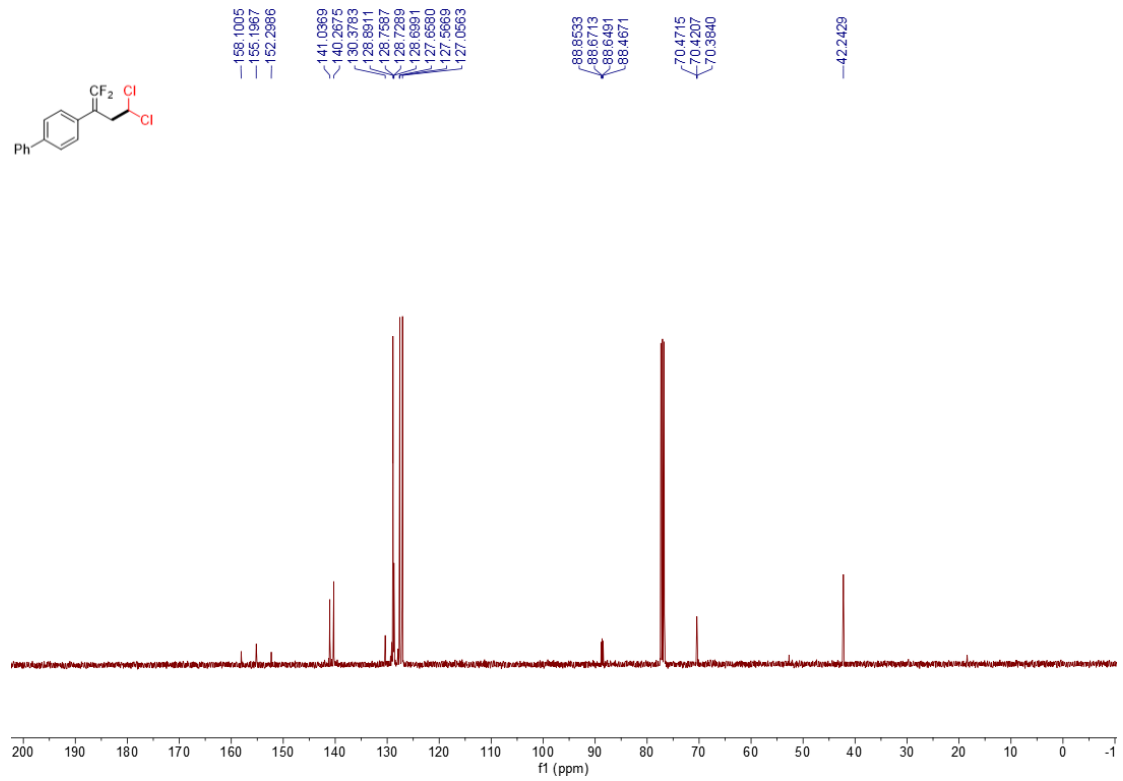

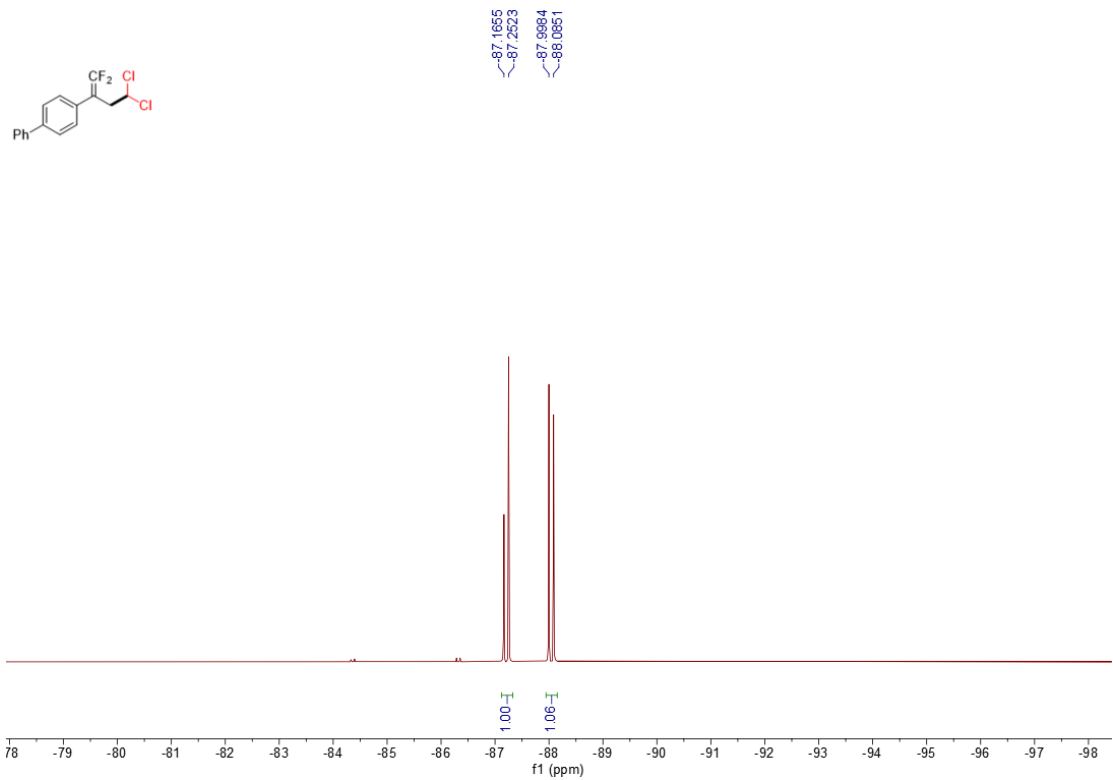

### NMR spectrum of 32

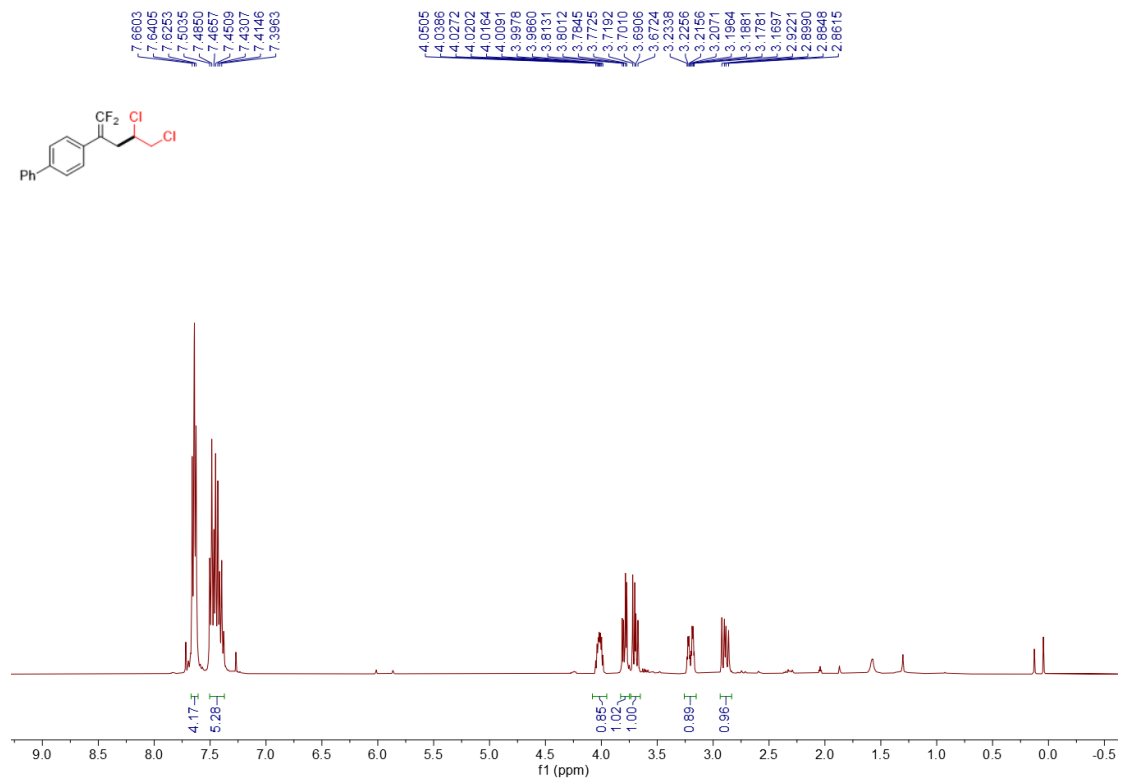









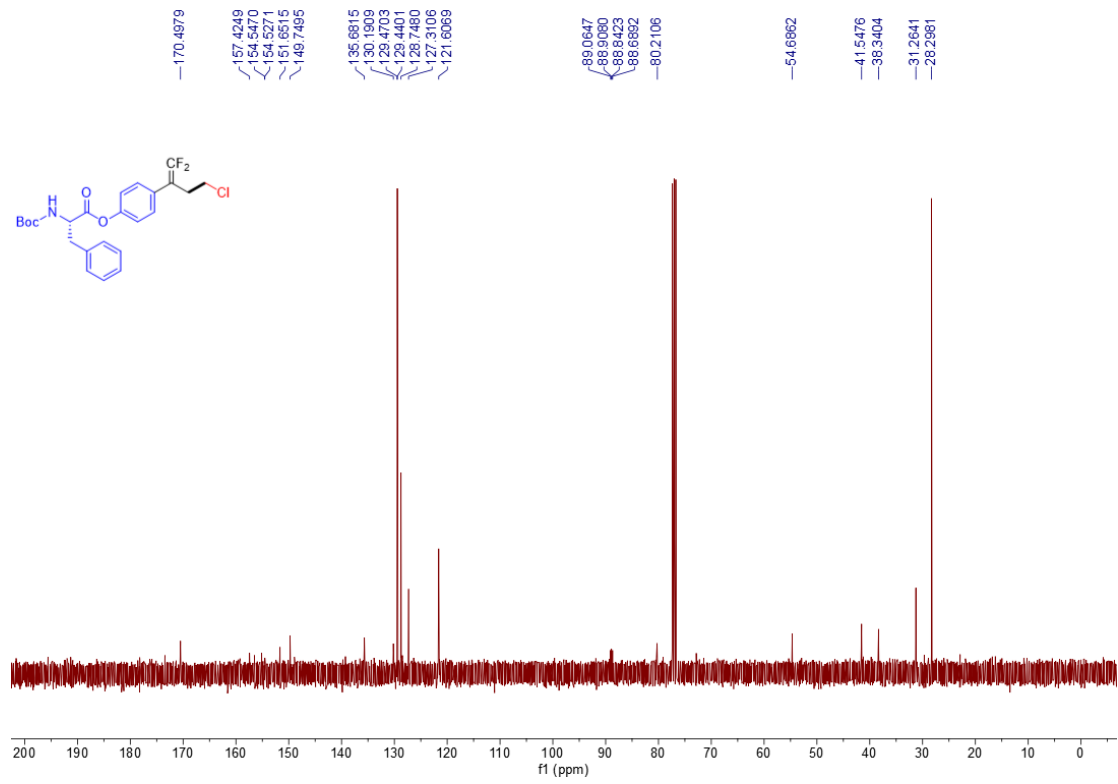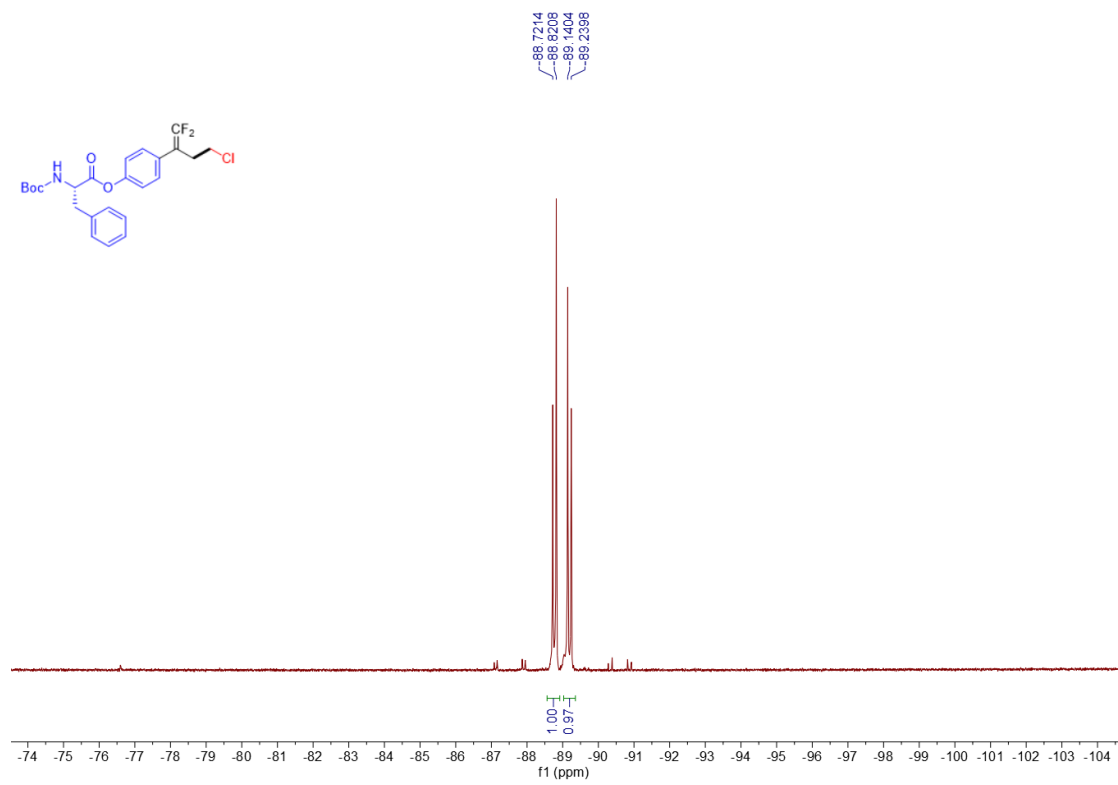

# NMR spectrum of 35

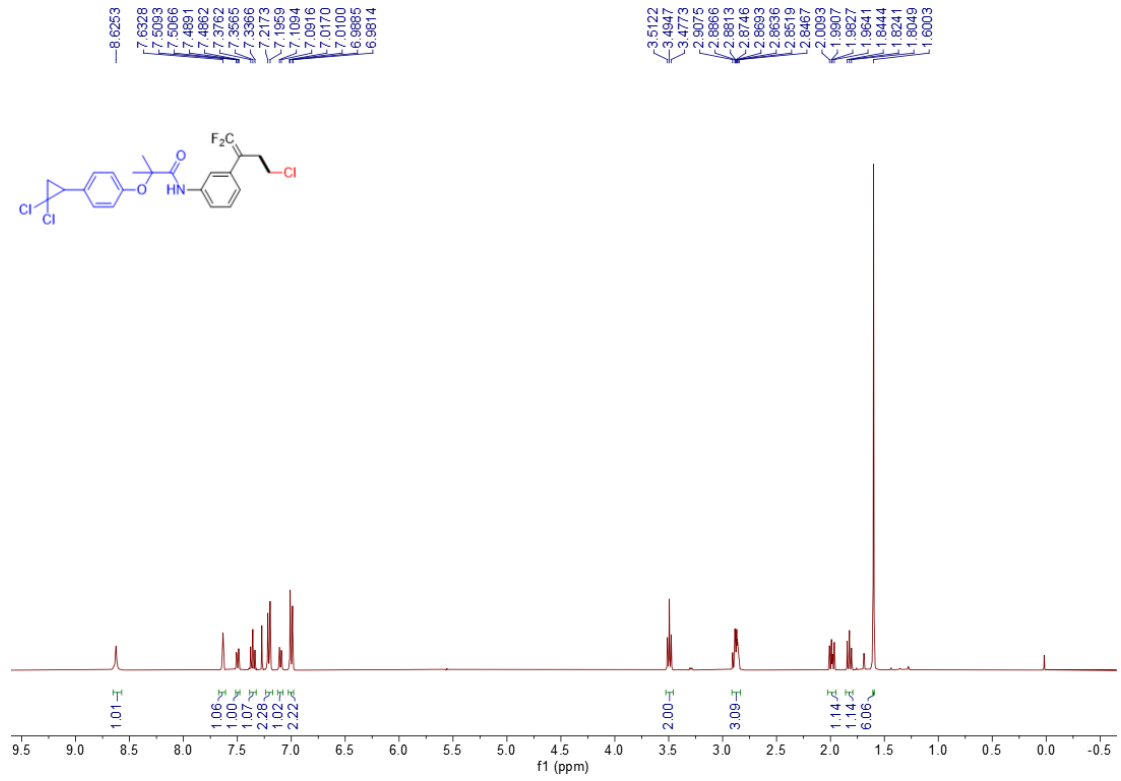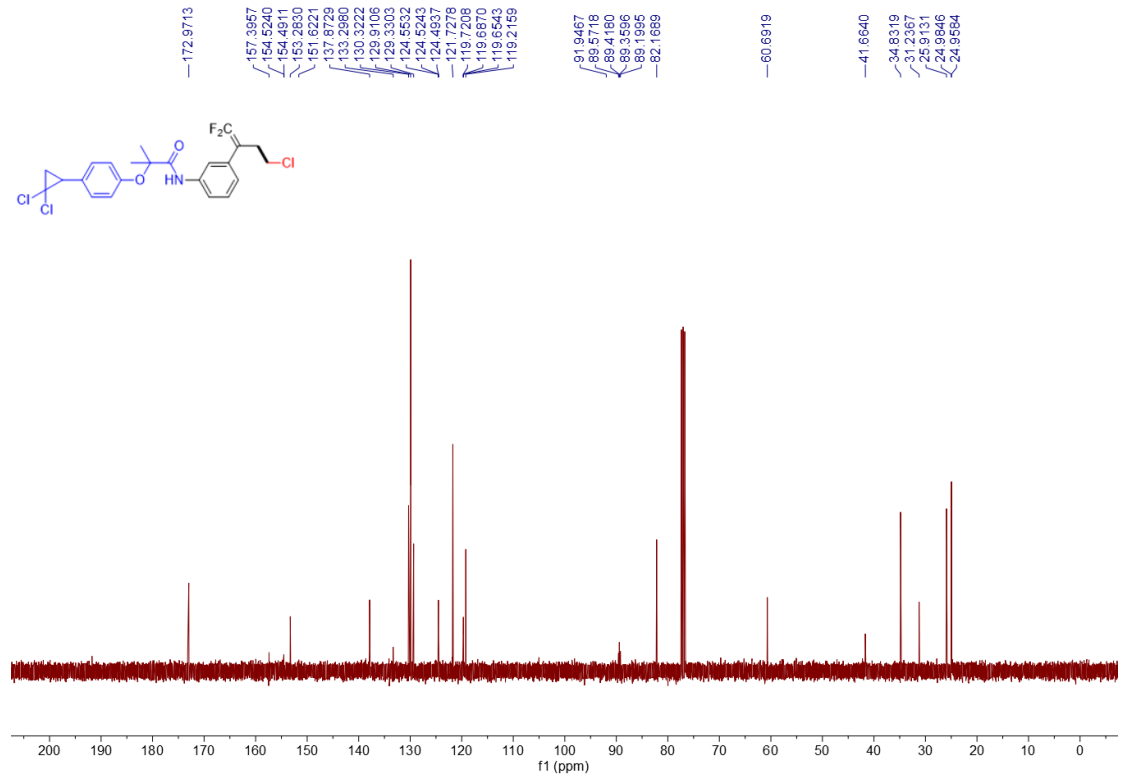

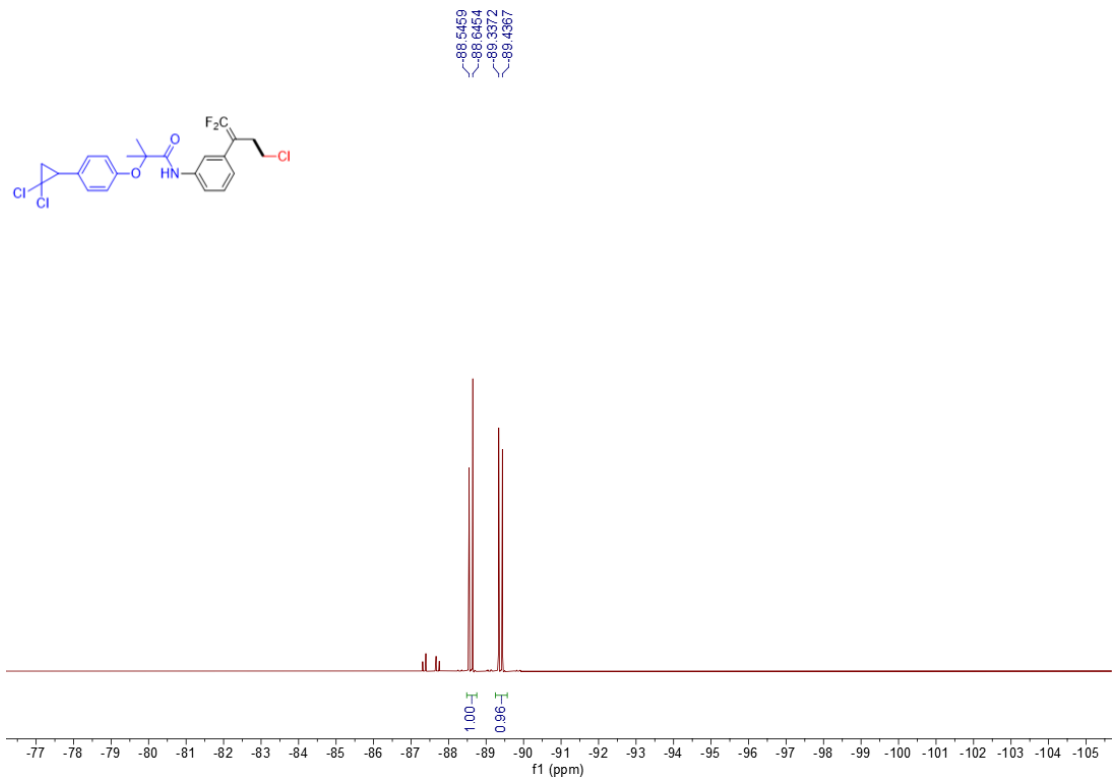

### NMR spectrum of 36

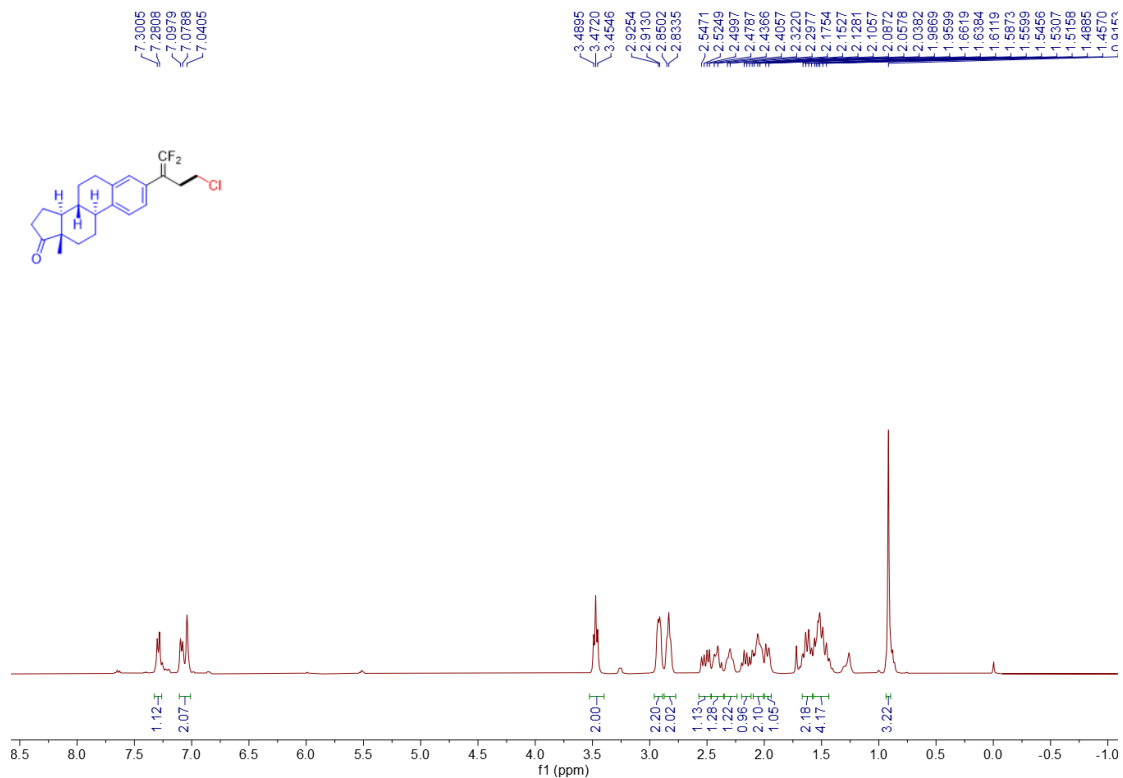

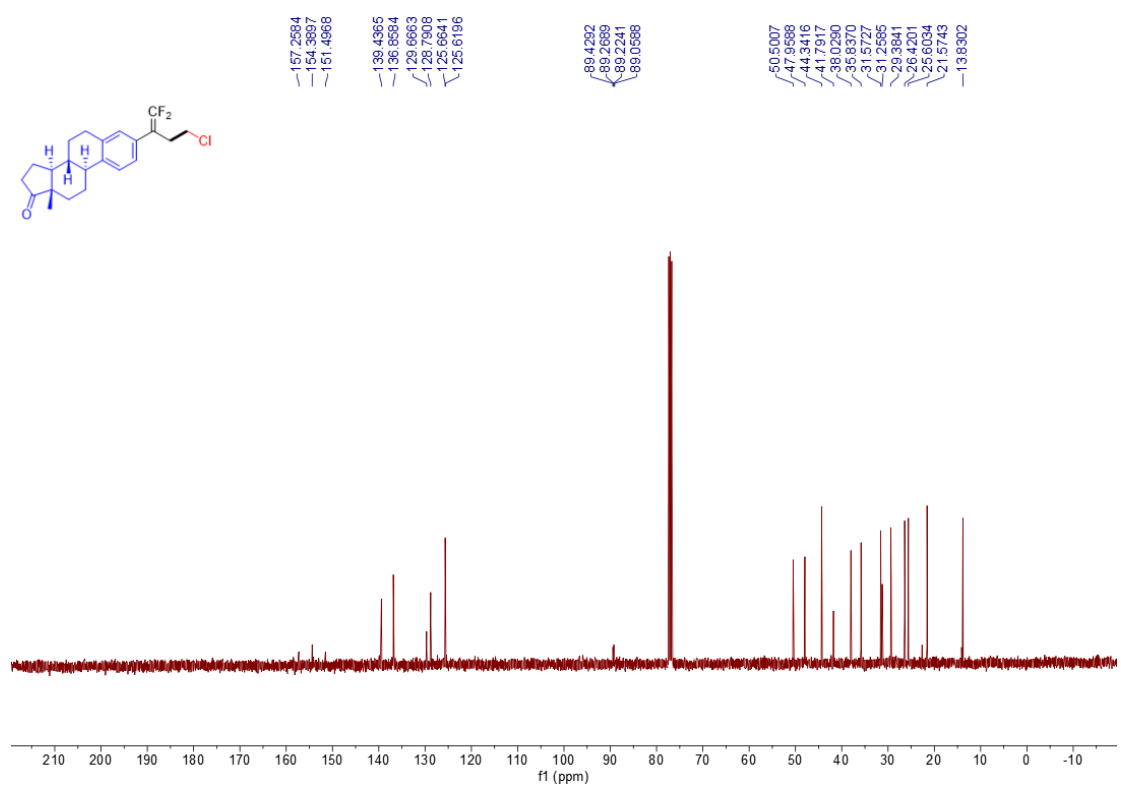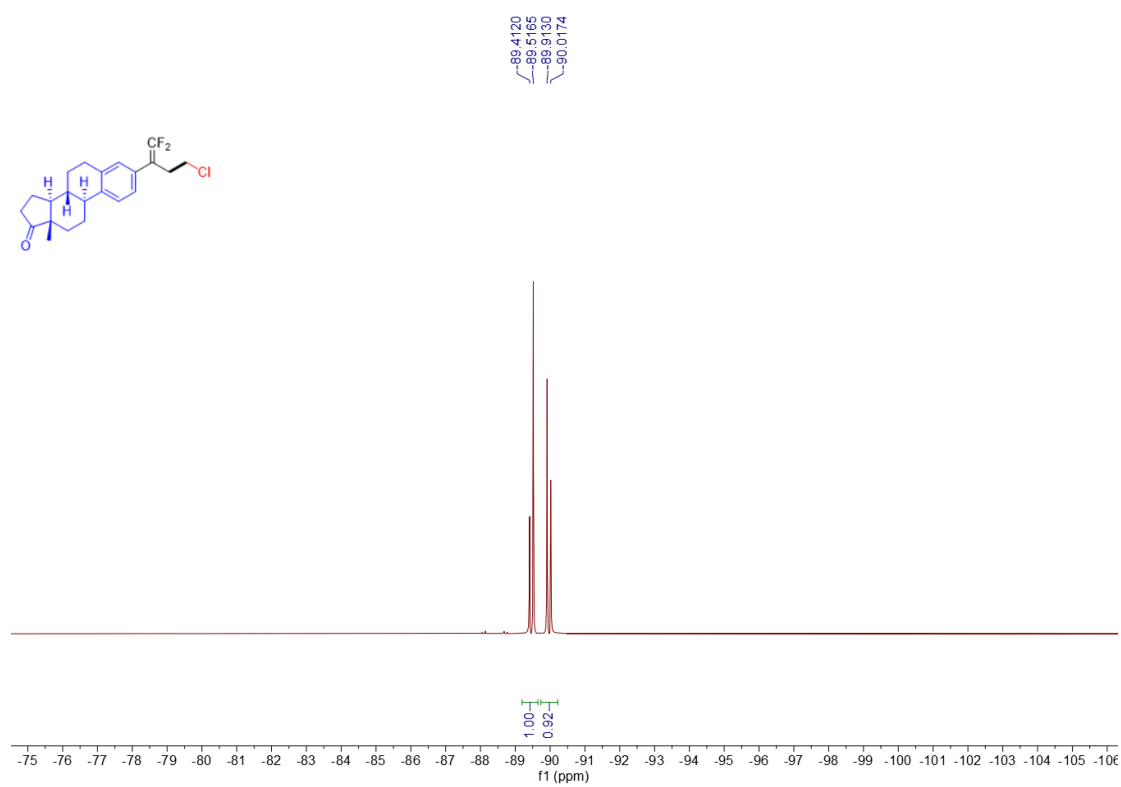

# NMR spectrum of 37

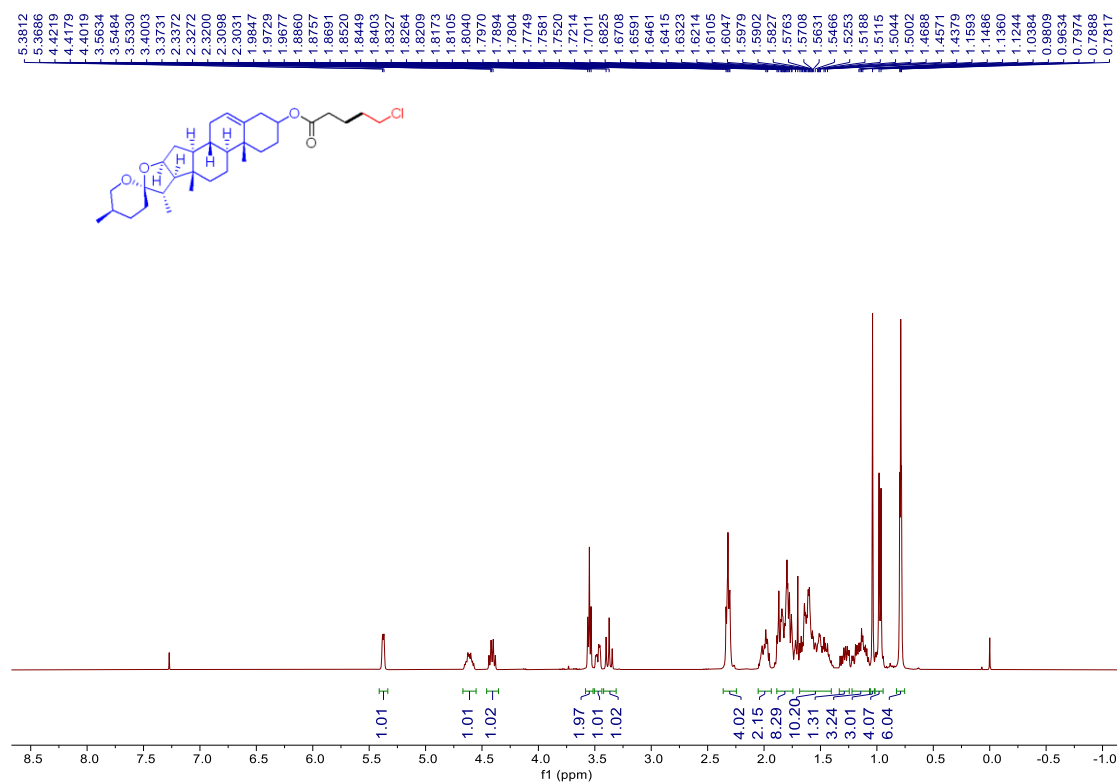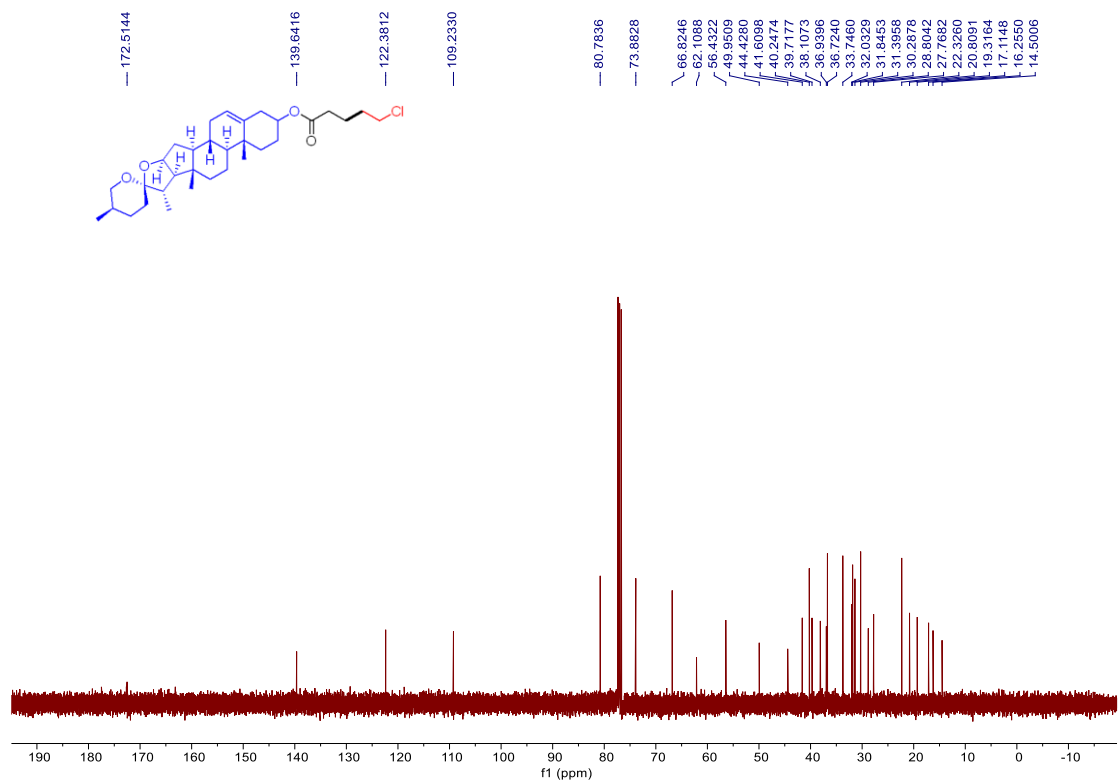

# NMR spectrum of 38

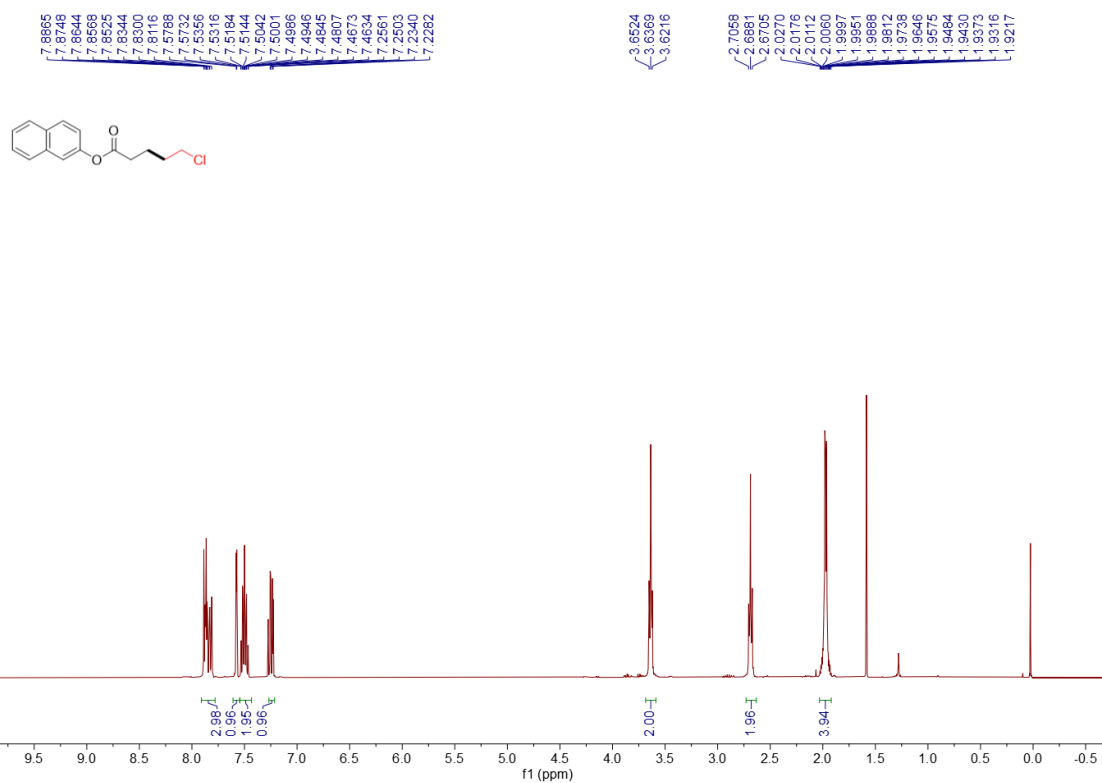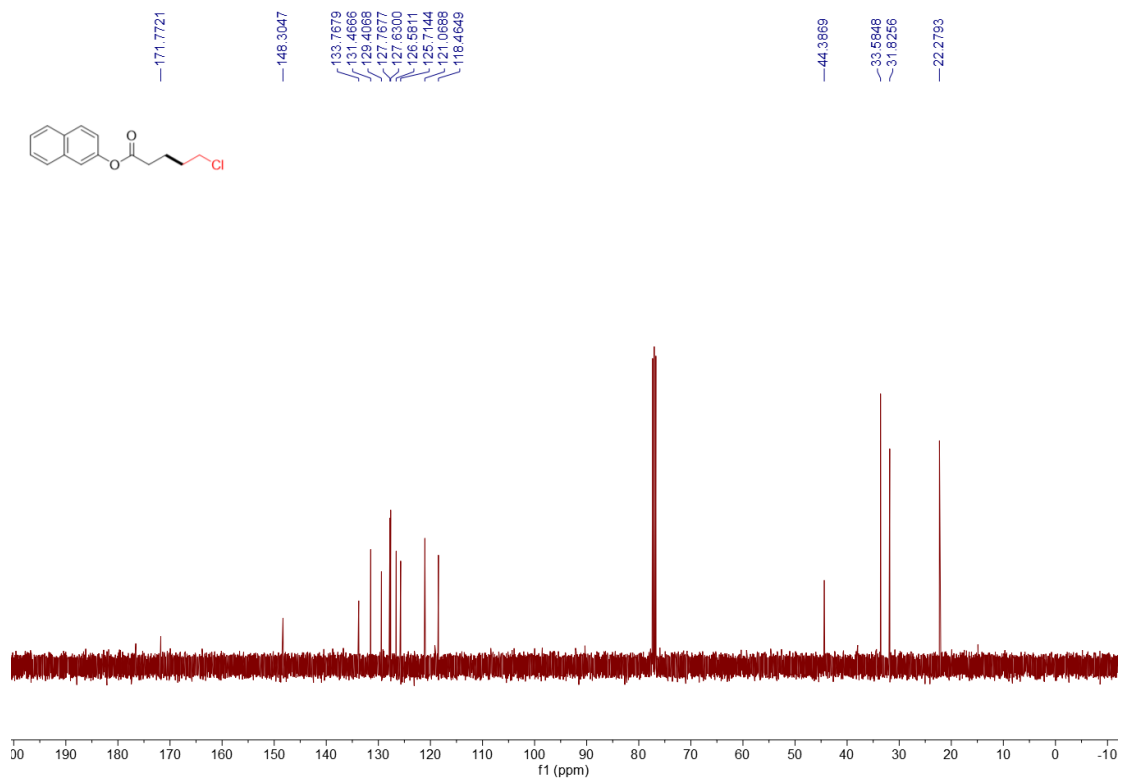

# NMR spectrum of 39

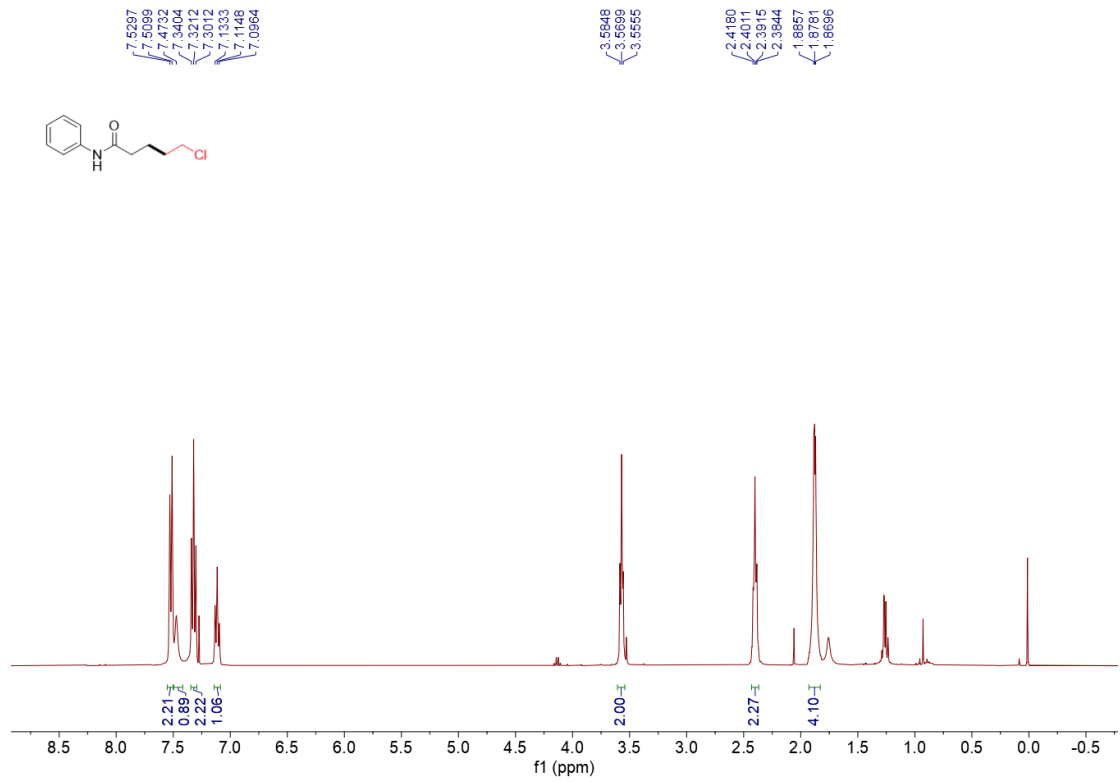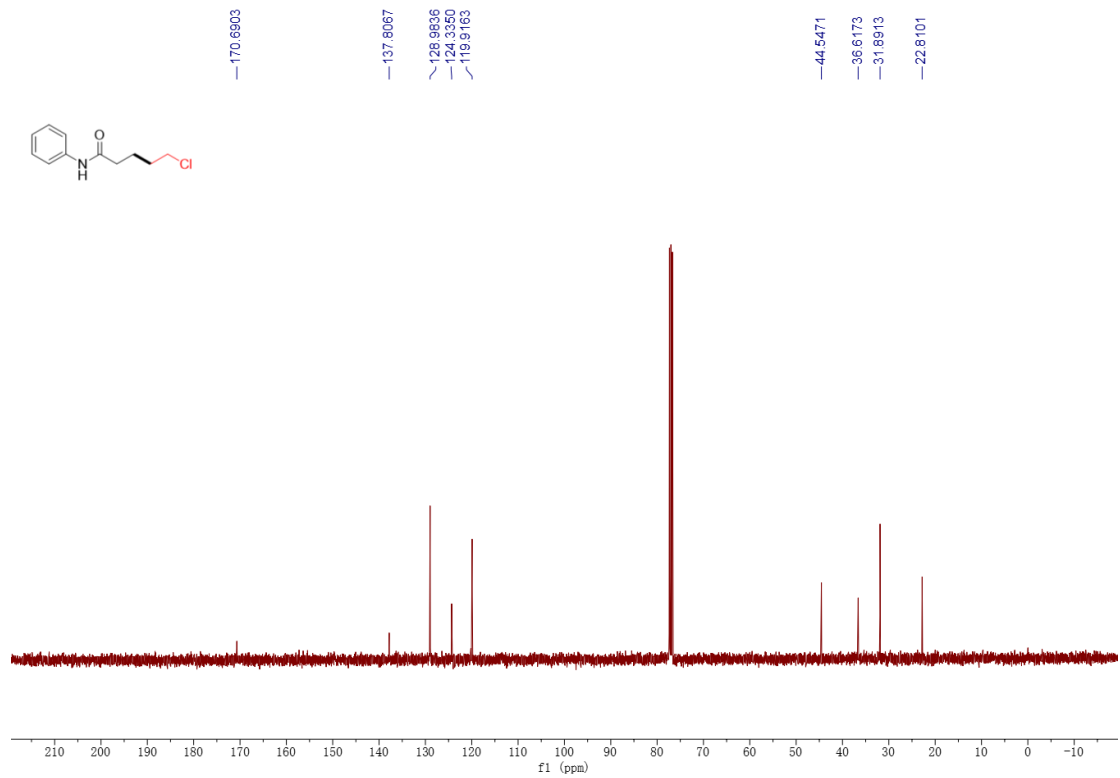

# NMR spectrum of 40

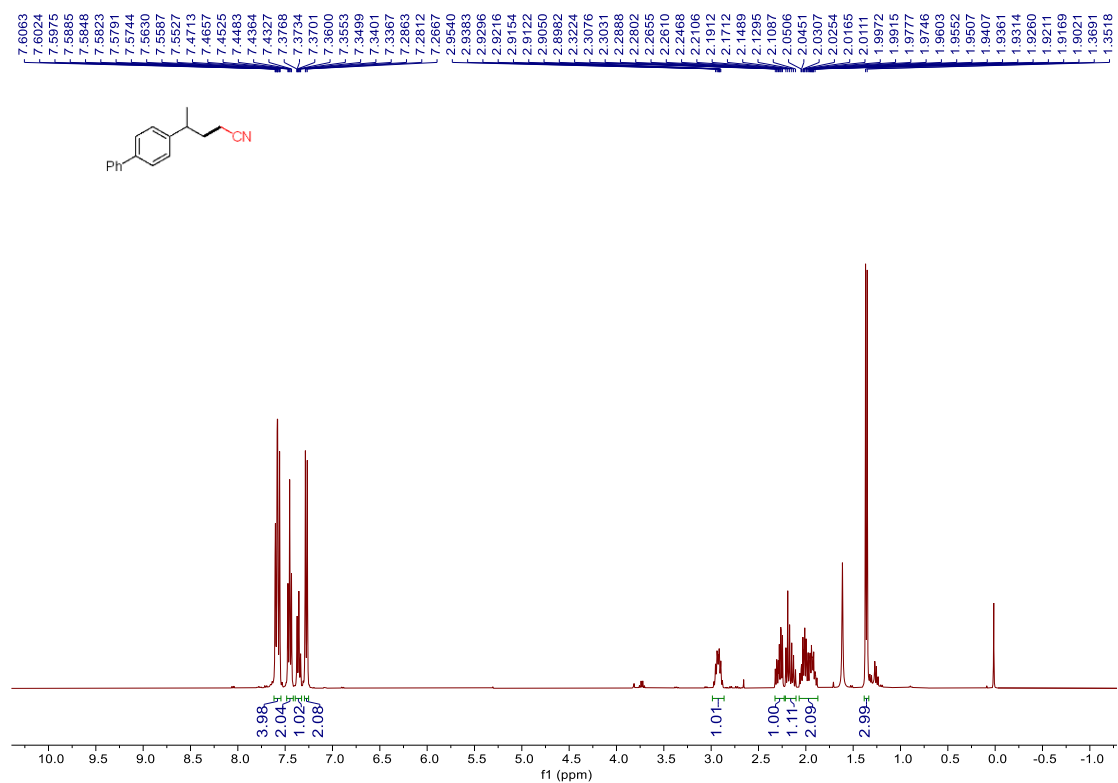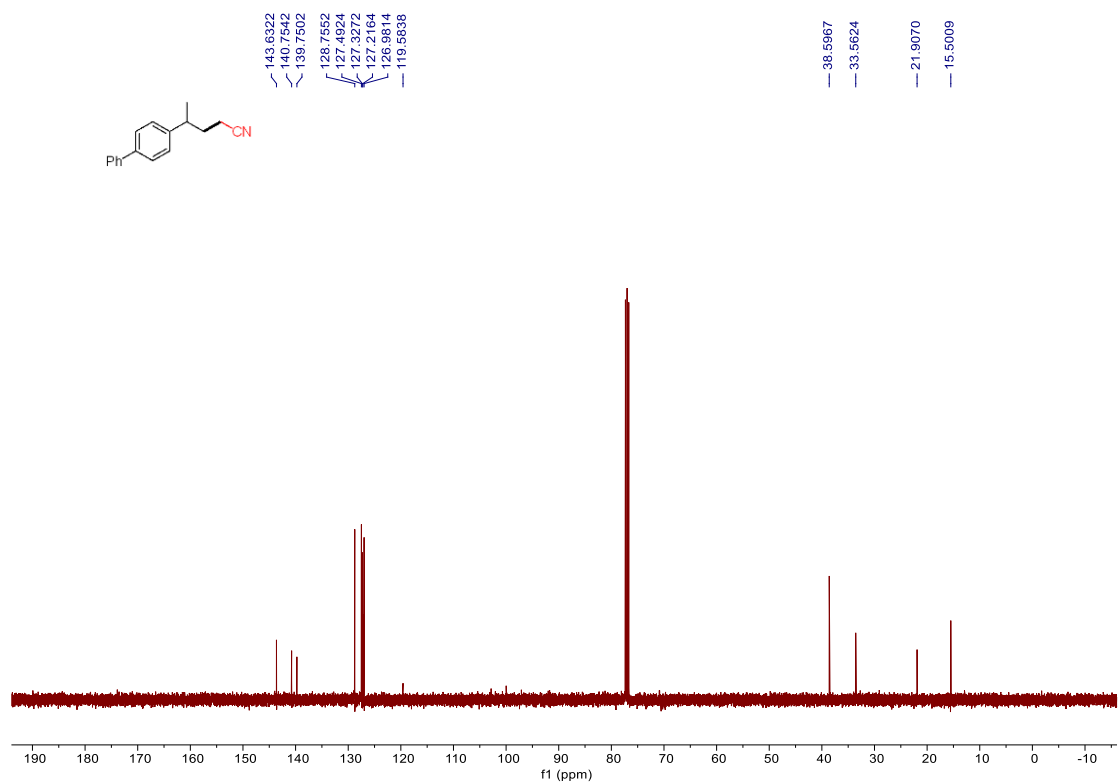



# NMR spectrum of 41

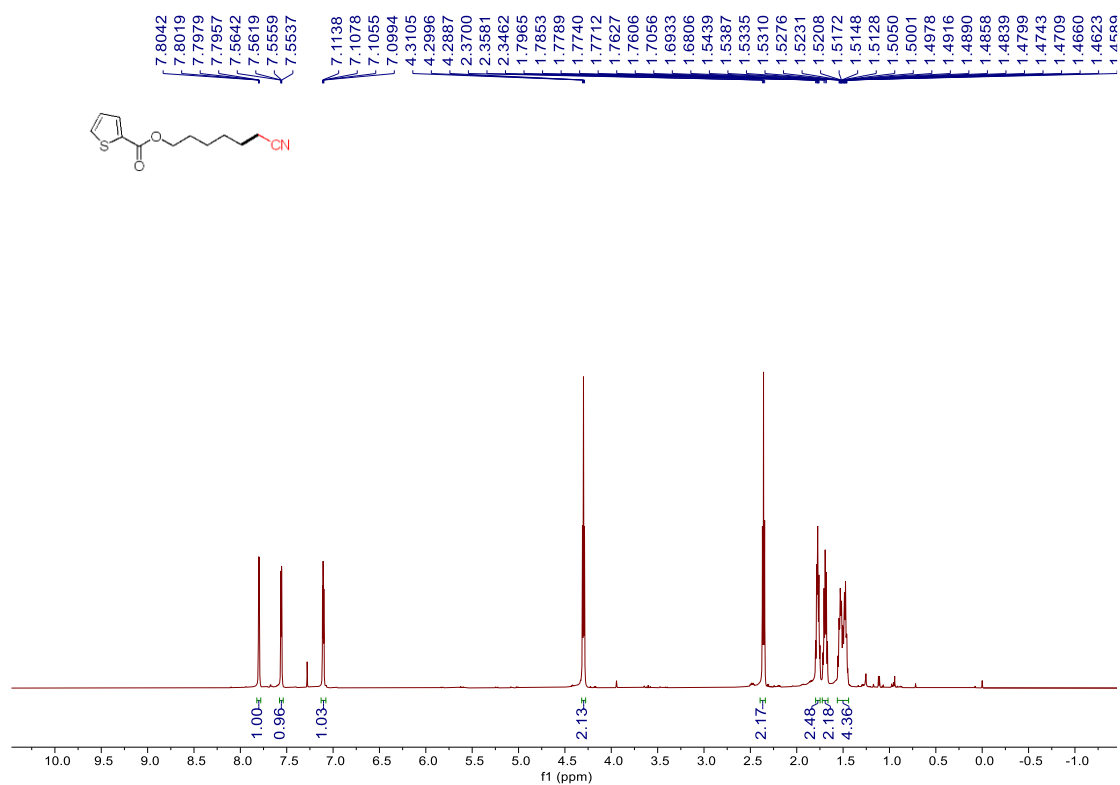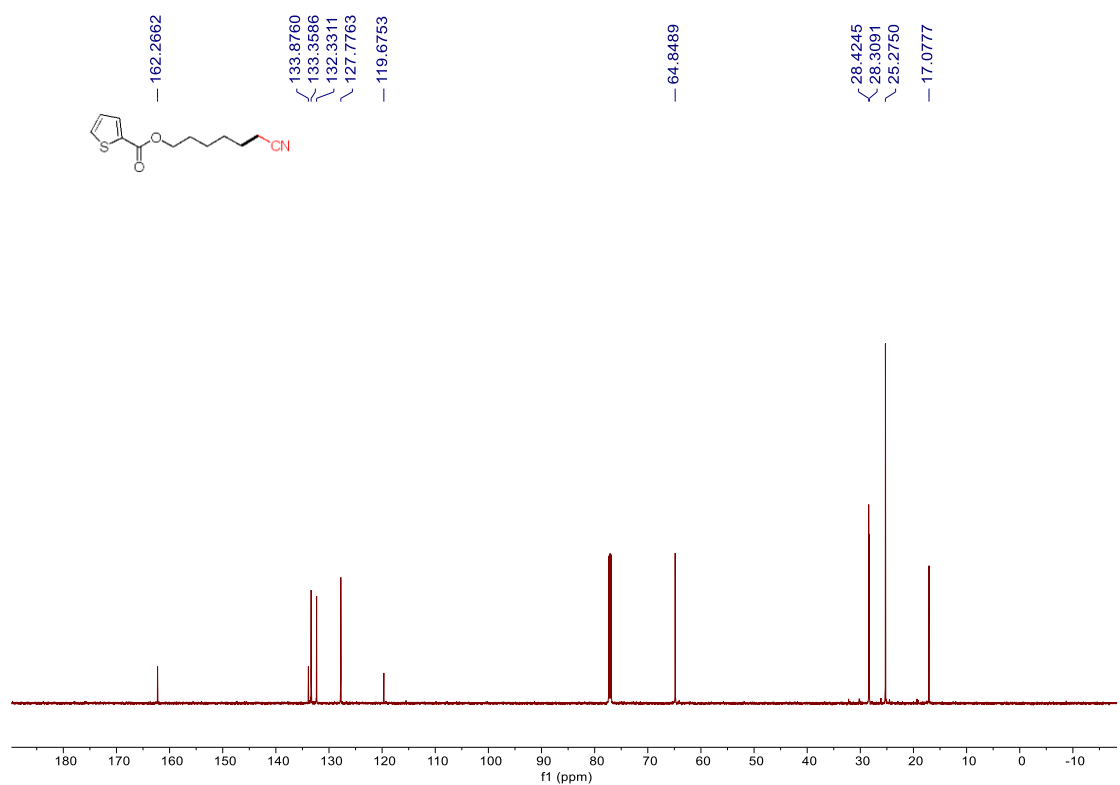

# NMR spectrum of 42

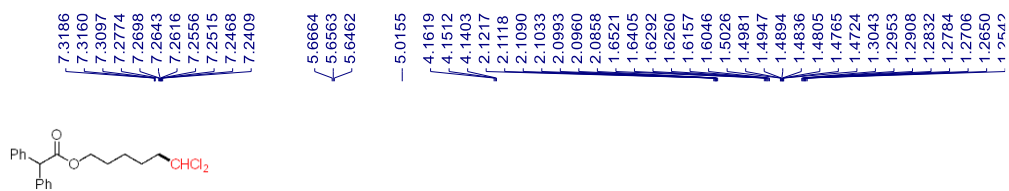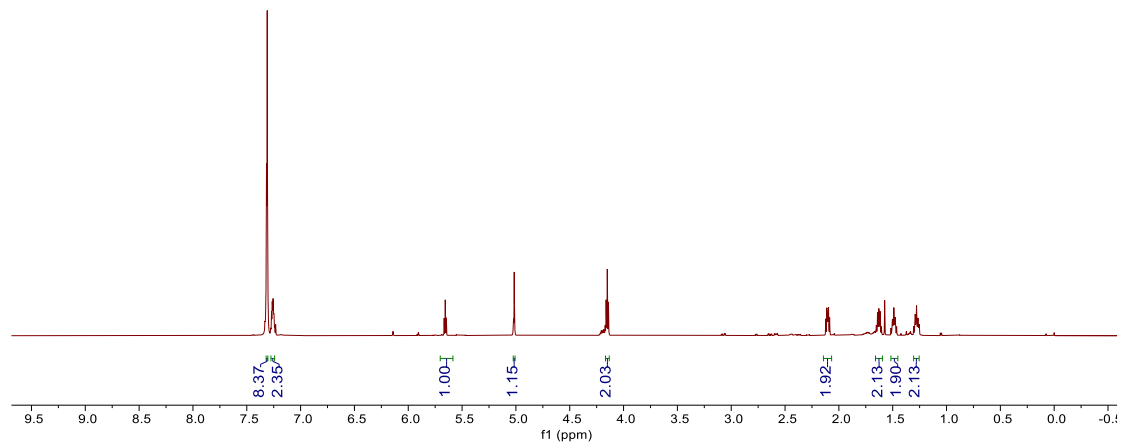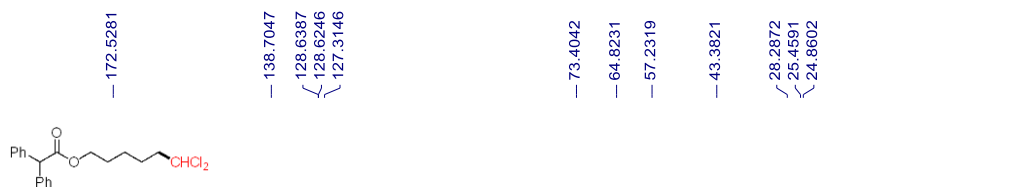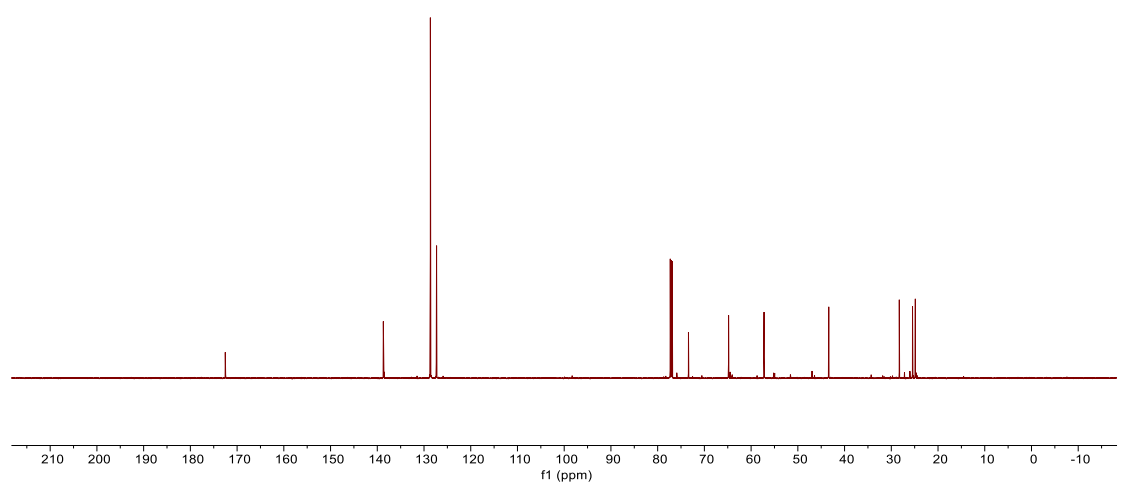

# NMR spectrum of 43

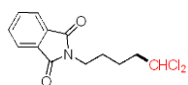

7.7817  
7.7763  
7.7723  
7.7673  
7.6559  
7.6506  
7.6465  
7.6416

5.6835  
5.6735  
5.6637

3.6482  
3.6363  
3.6242  
2.1952  
2.1868  
2.1847  
2.1818  
2.1778  
2.1744  
2.1717  
2.1689  
2.1594

1.6952  
1.6841  
1.6820  
1.6704  
1.6582  
1.6555  
1.6451  
1.5664  
1.5576  
1.5526  
1.5474  
1.5403  
1.5350  
1.5316  
1.5275  
1.5257  
1.5235  
1.5145

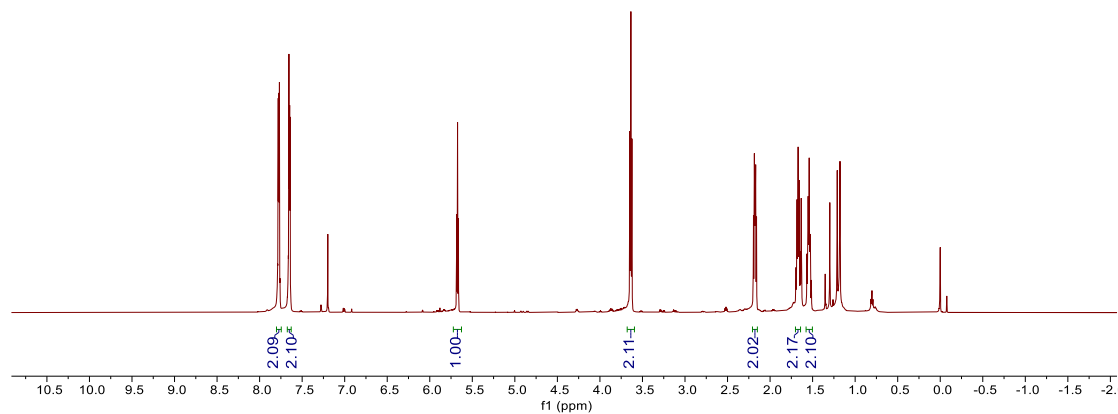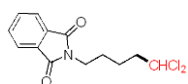

168.3613

133.9892  
132.0709

123.2662

73.1470

42.9169

37.4712

27.5353

23.1839

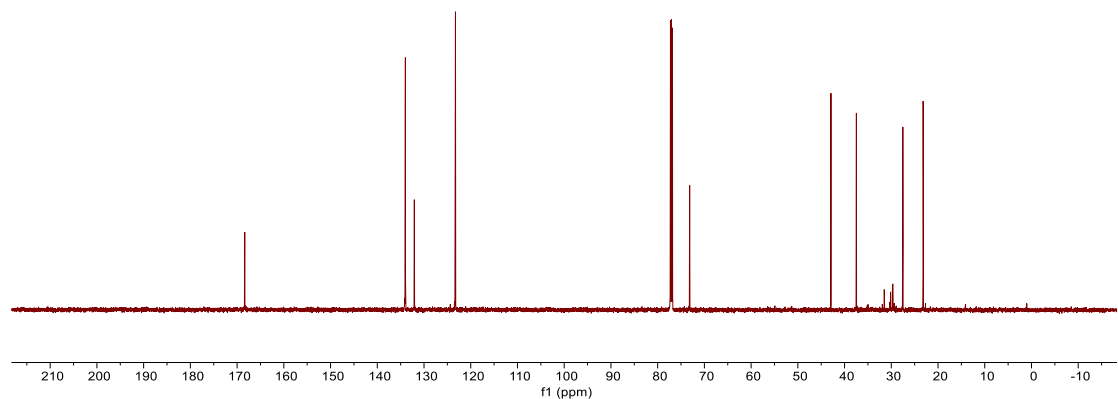



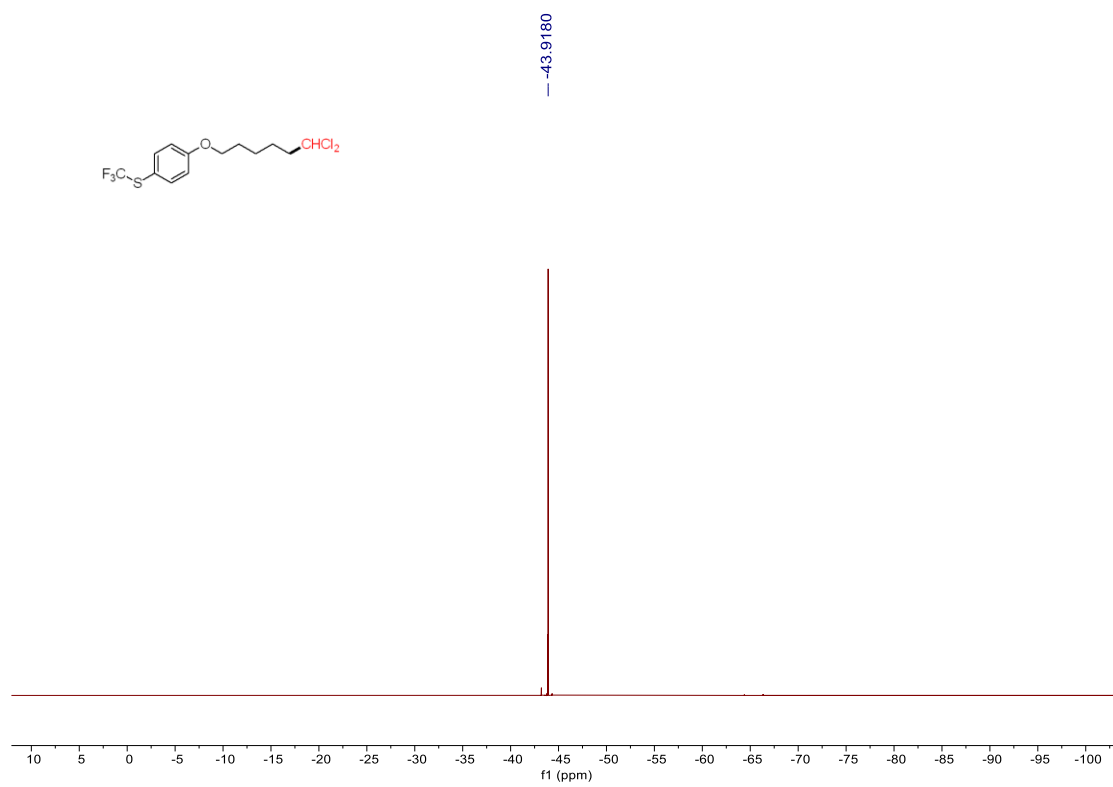

**NMR spectrum of 45**

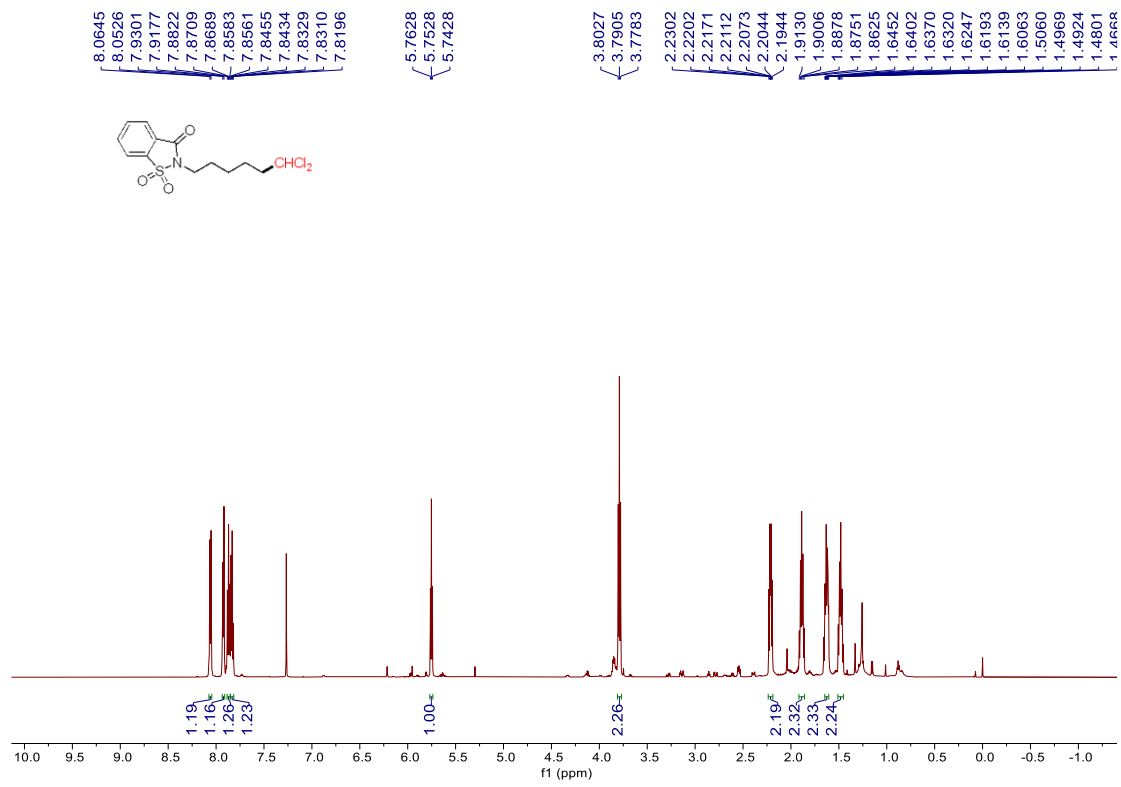

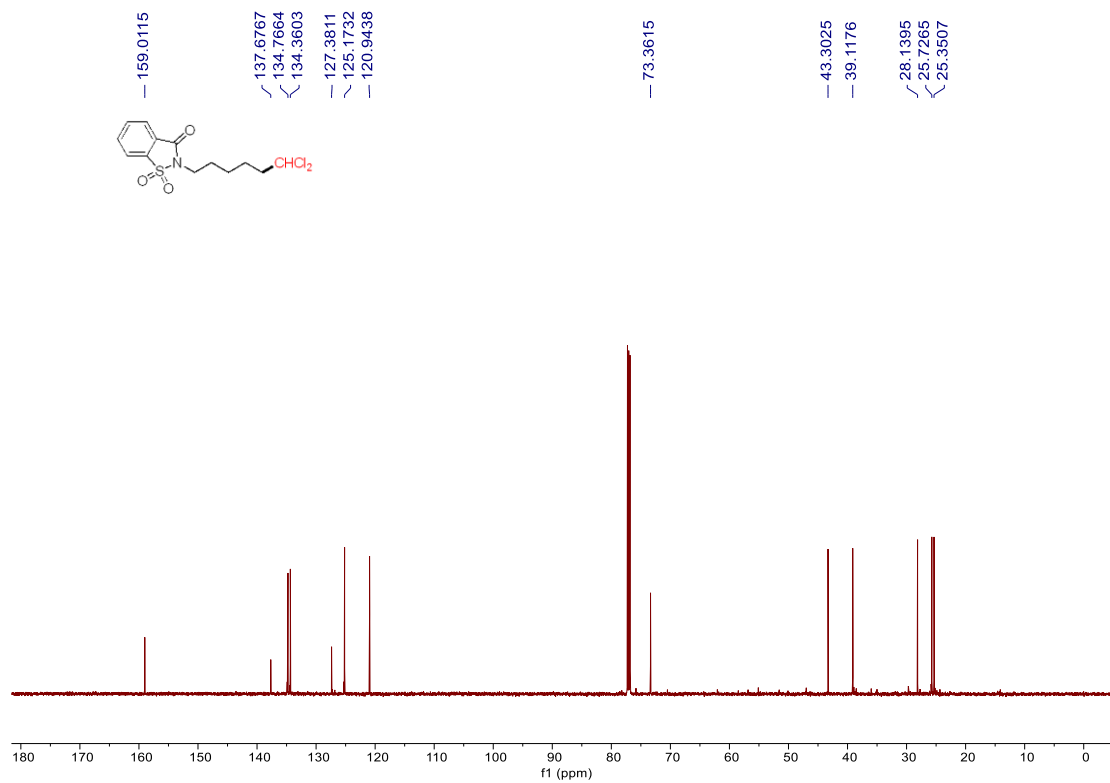

### NMR spectrum of 46

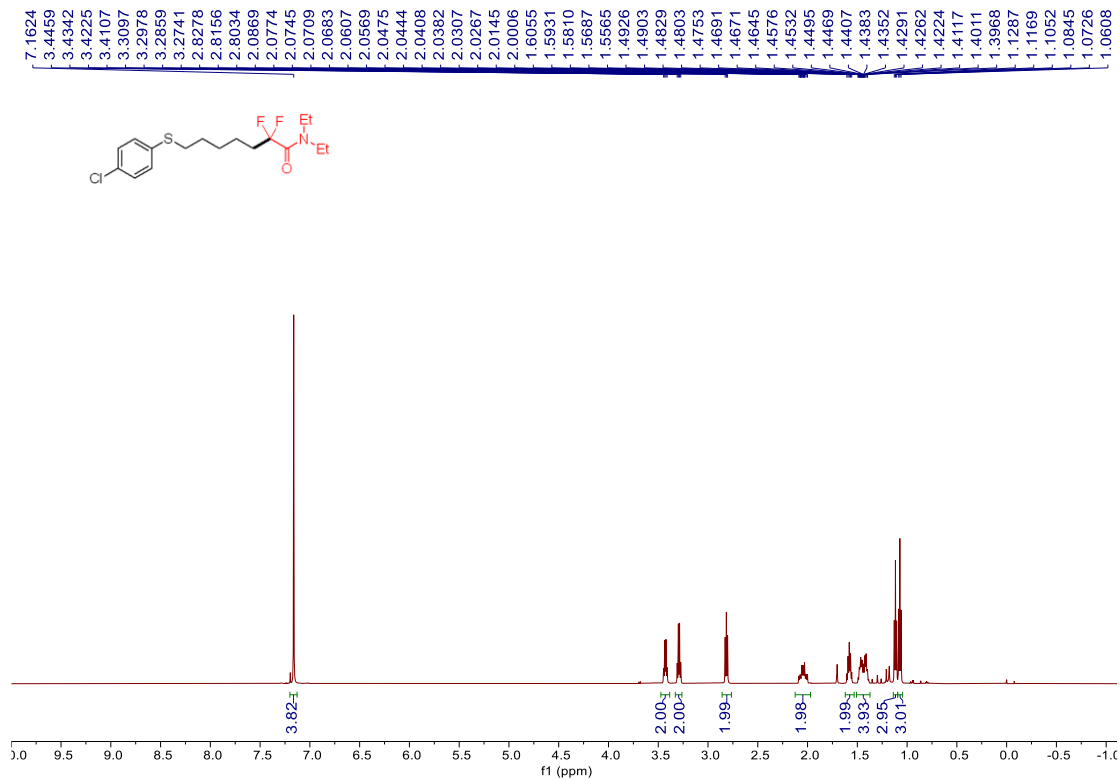

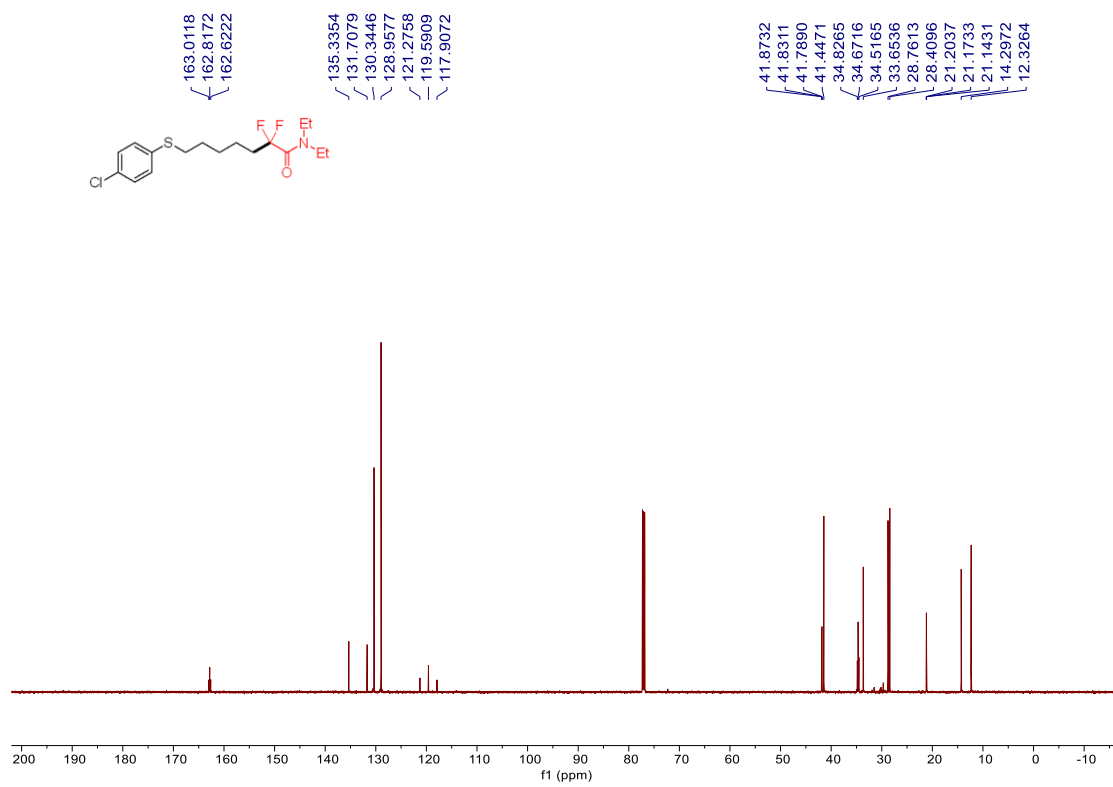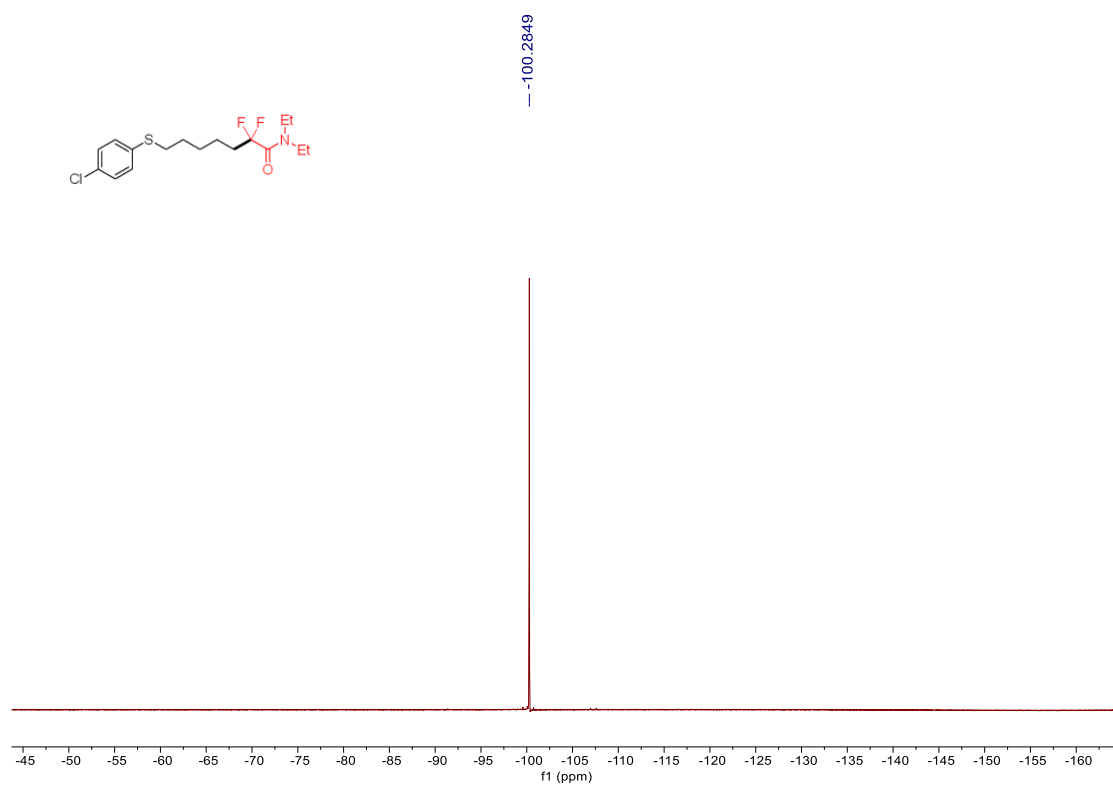

# NMR spectrum of 47

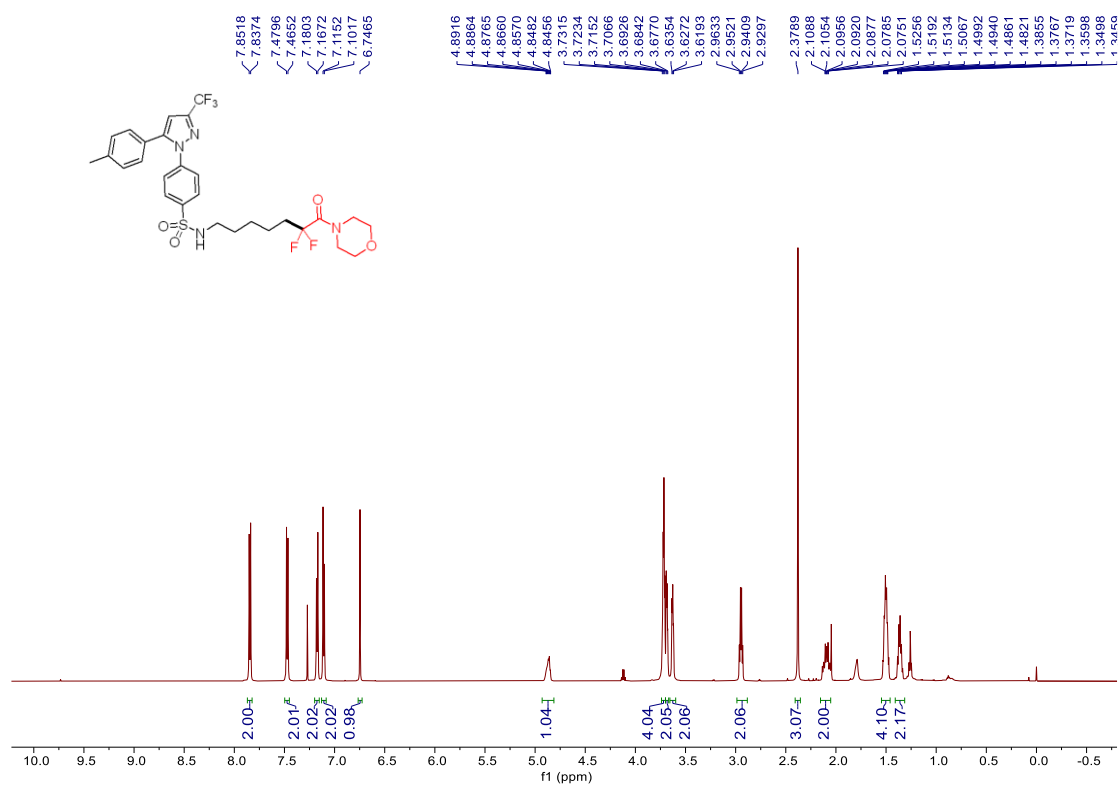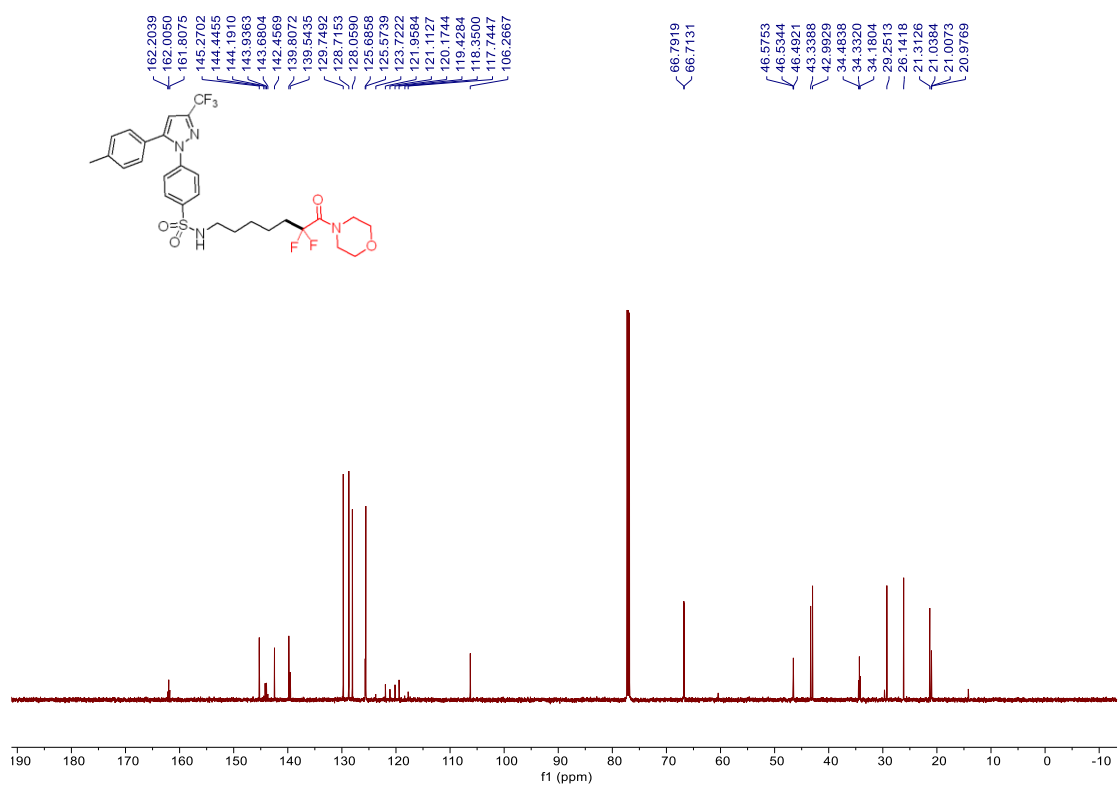



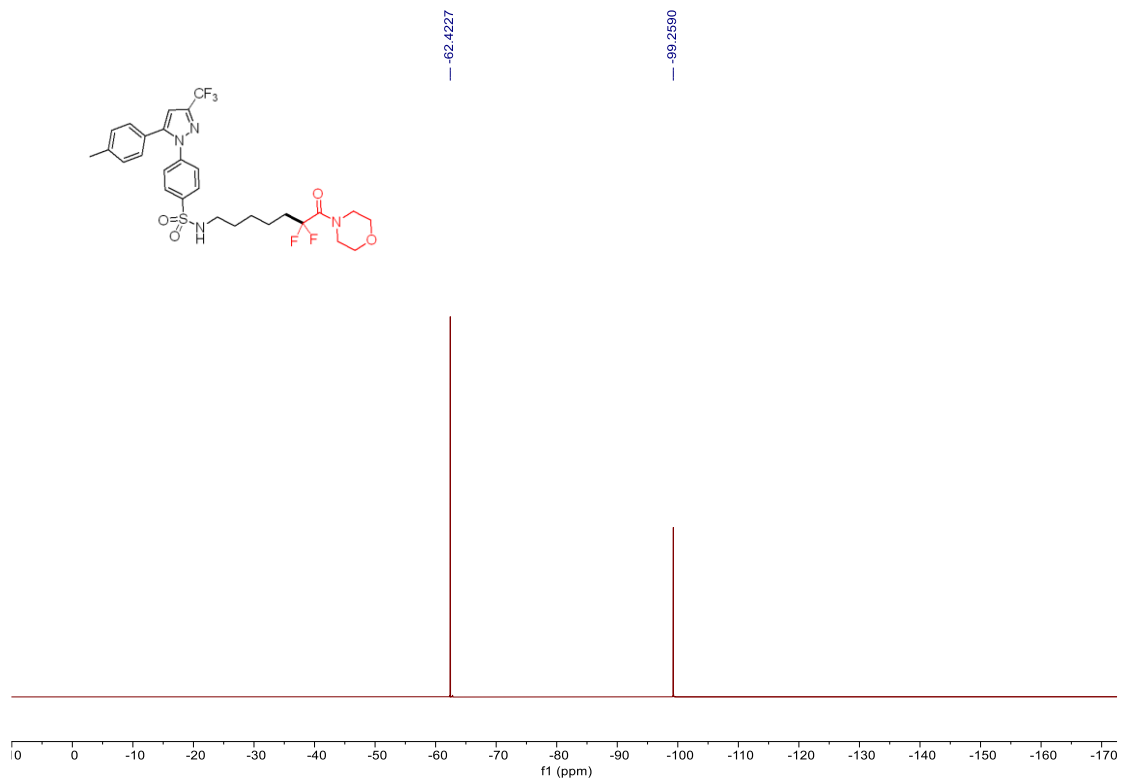

### NMR spectrum of 48

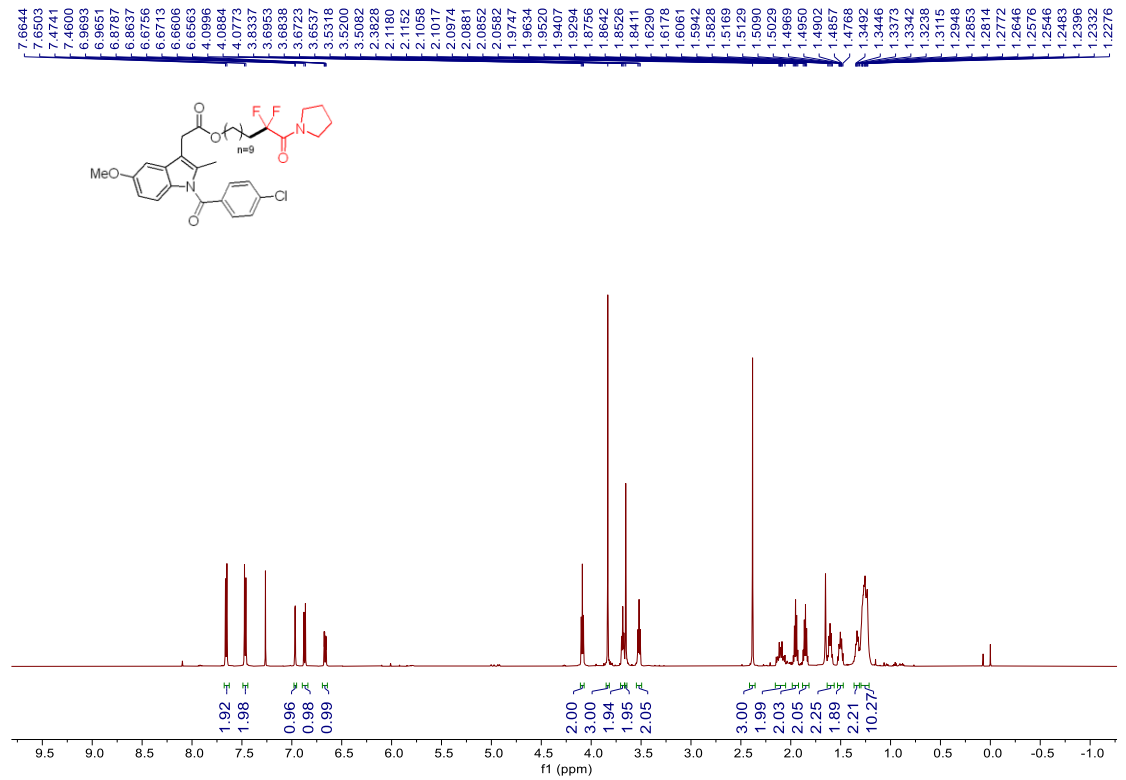

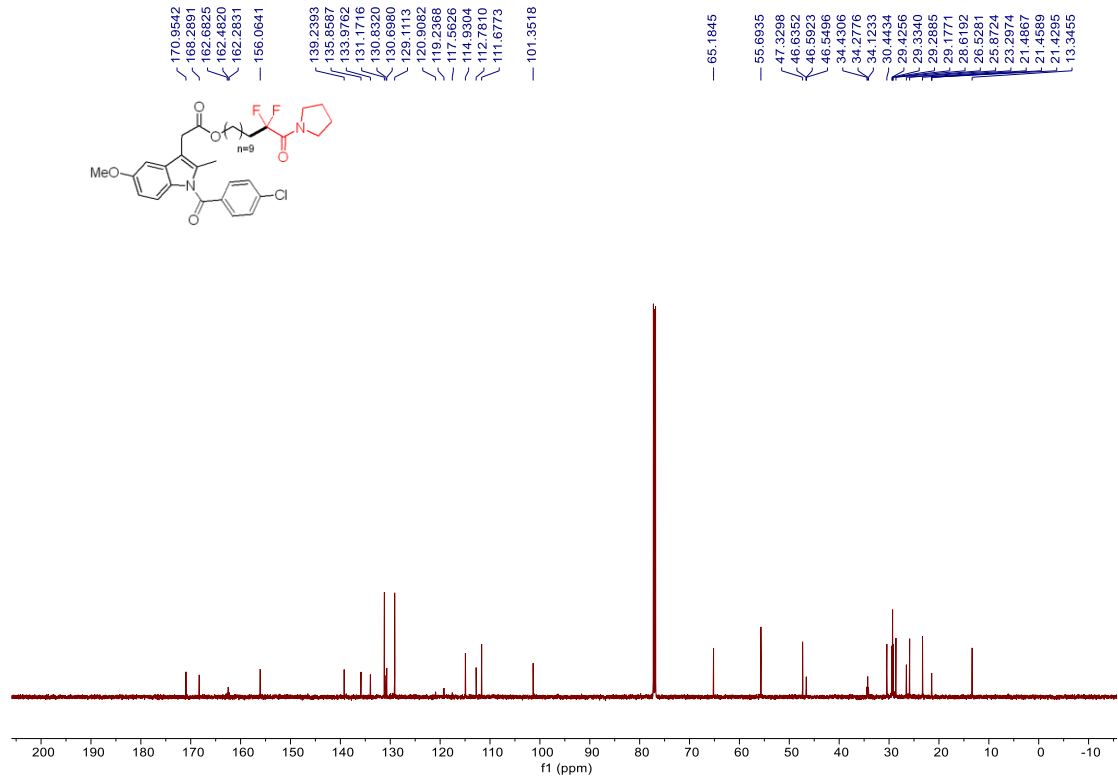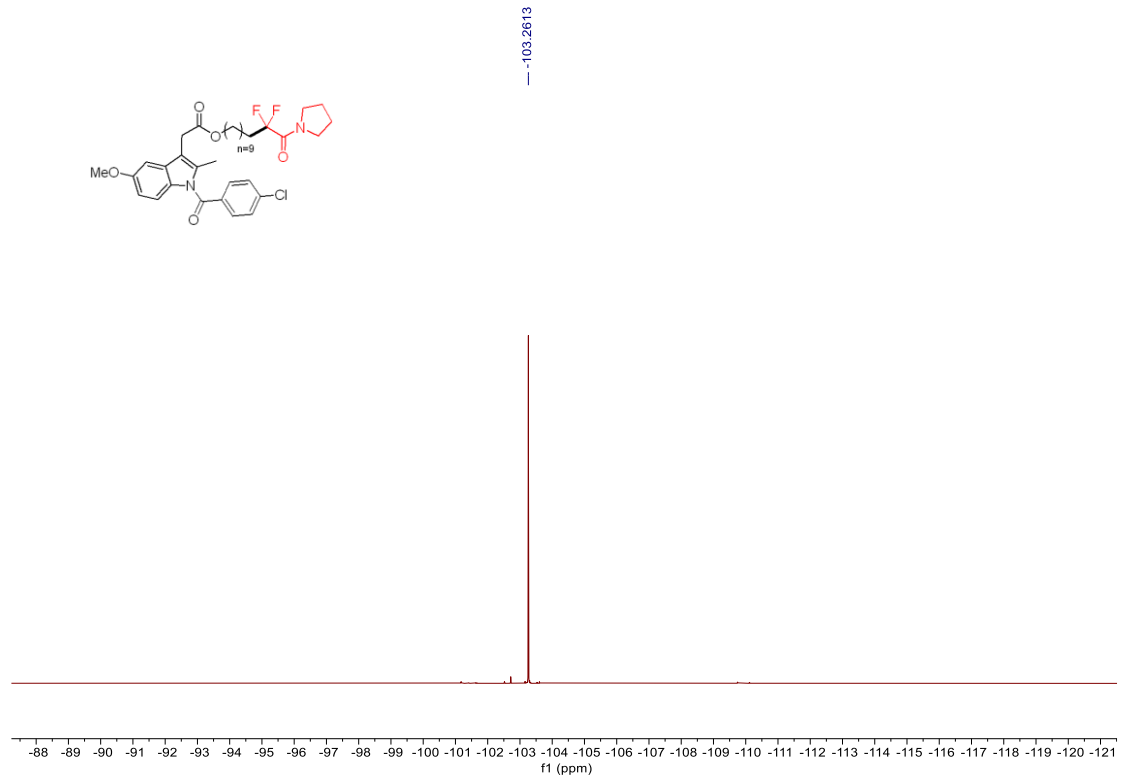

# NMR spectrum of 49

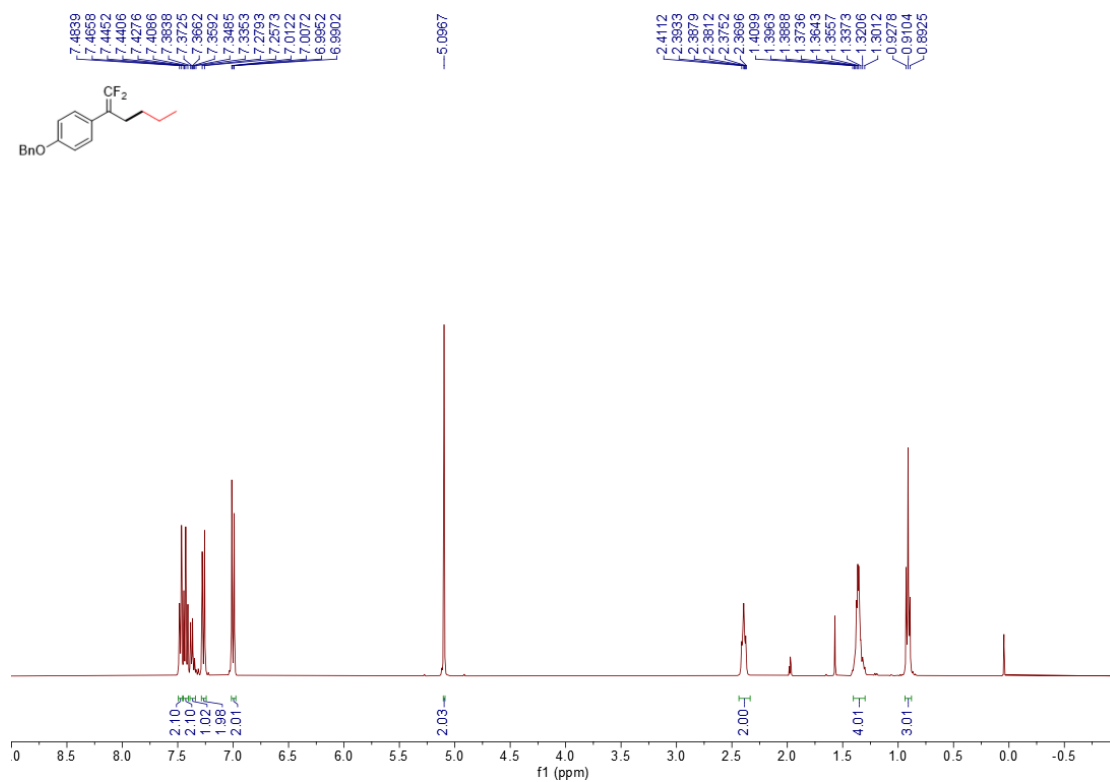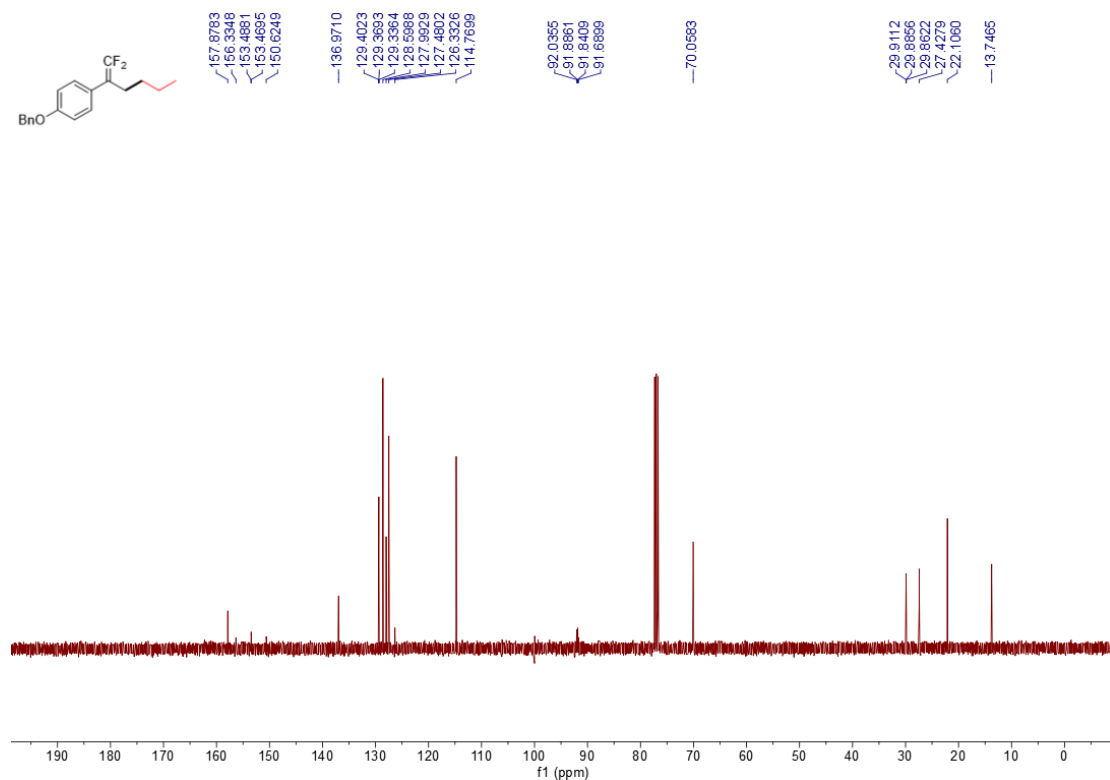

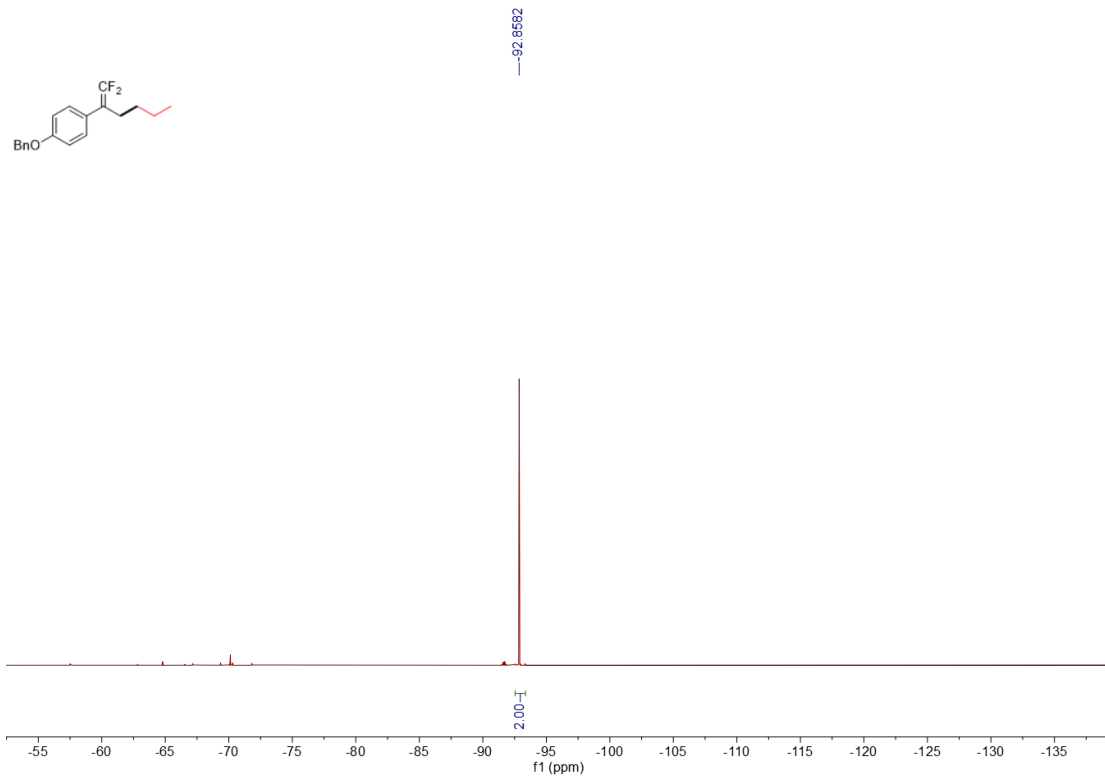

### NMR spectrum of 50

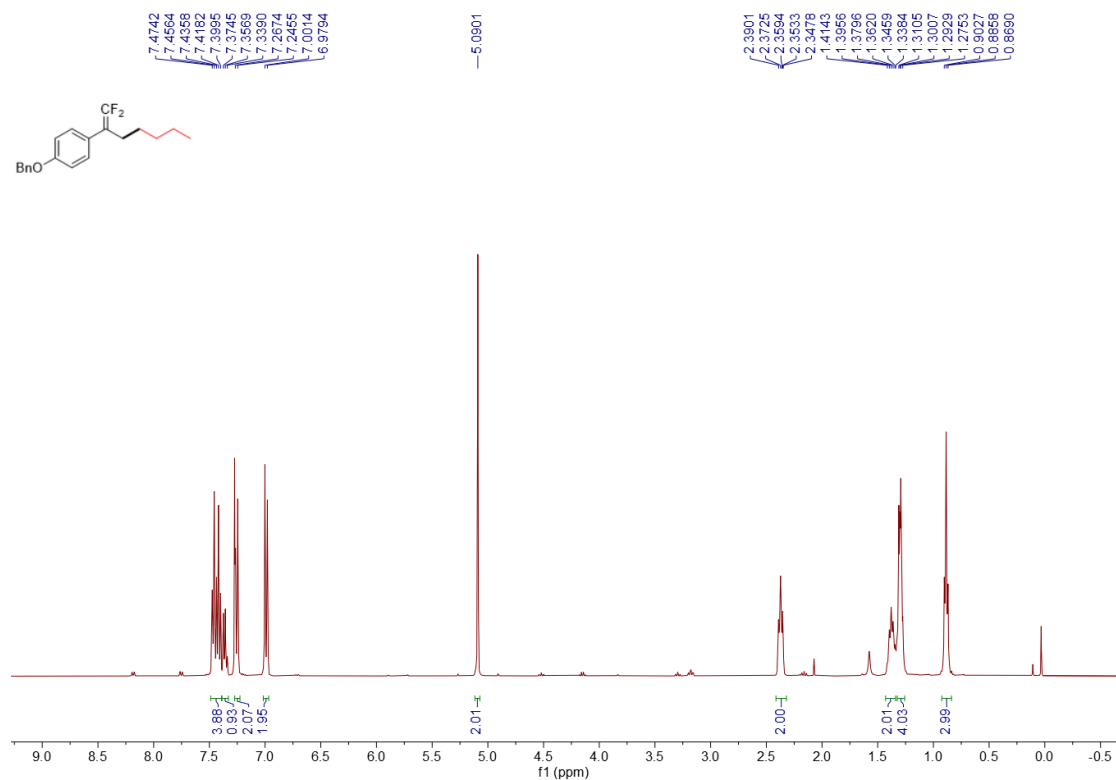

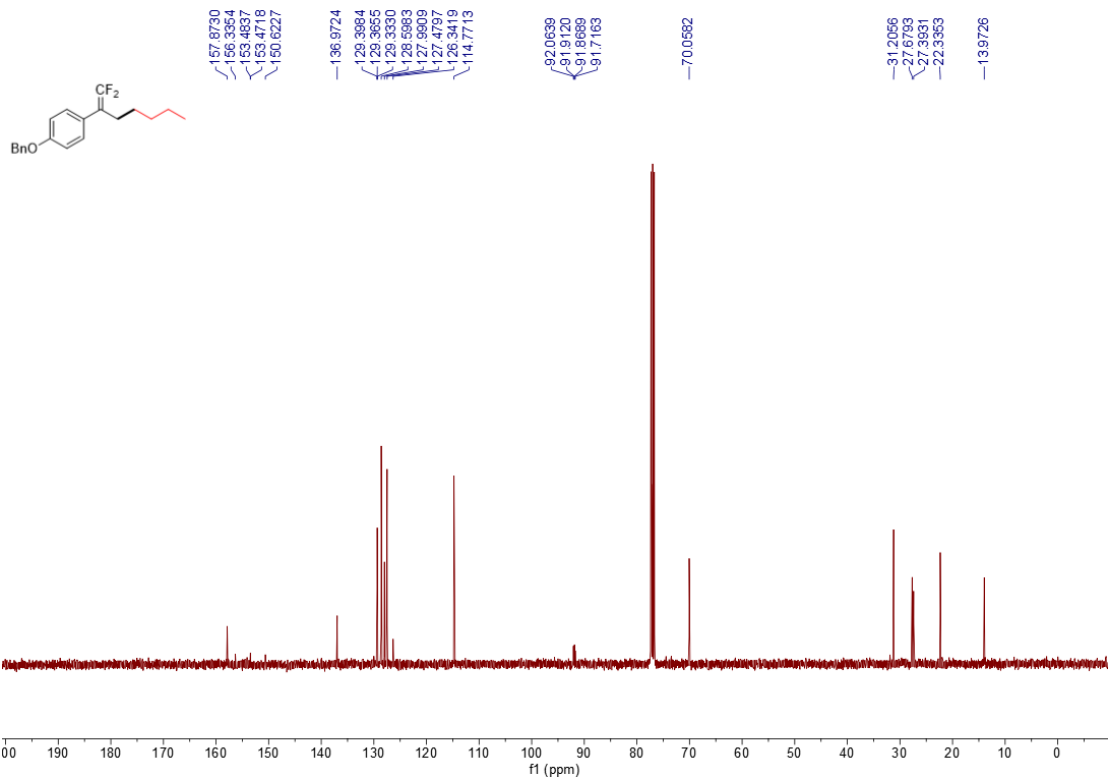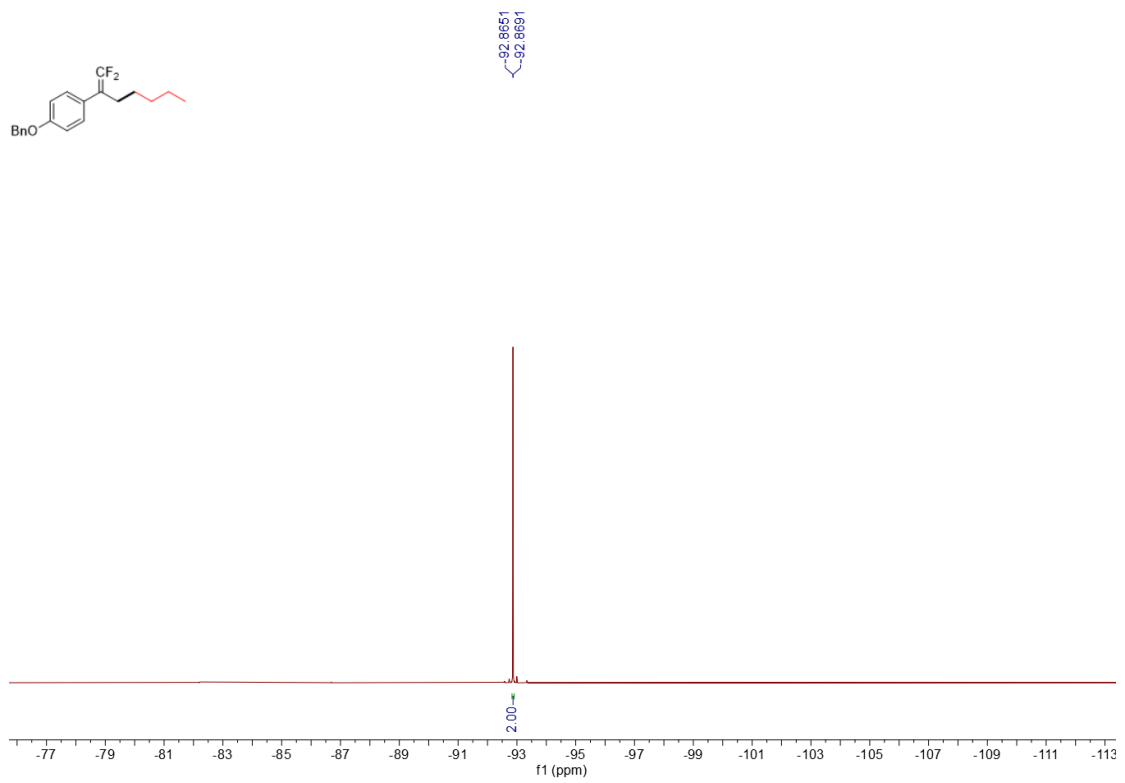

# NMR spectrum of 51

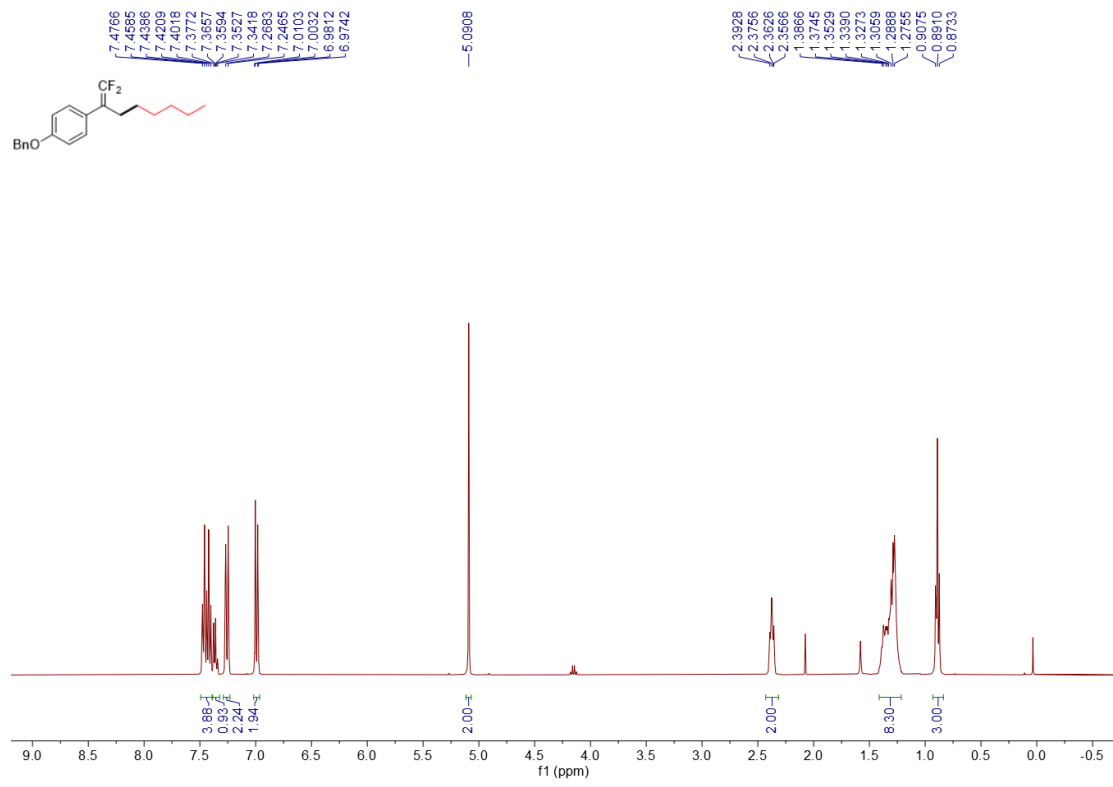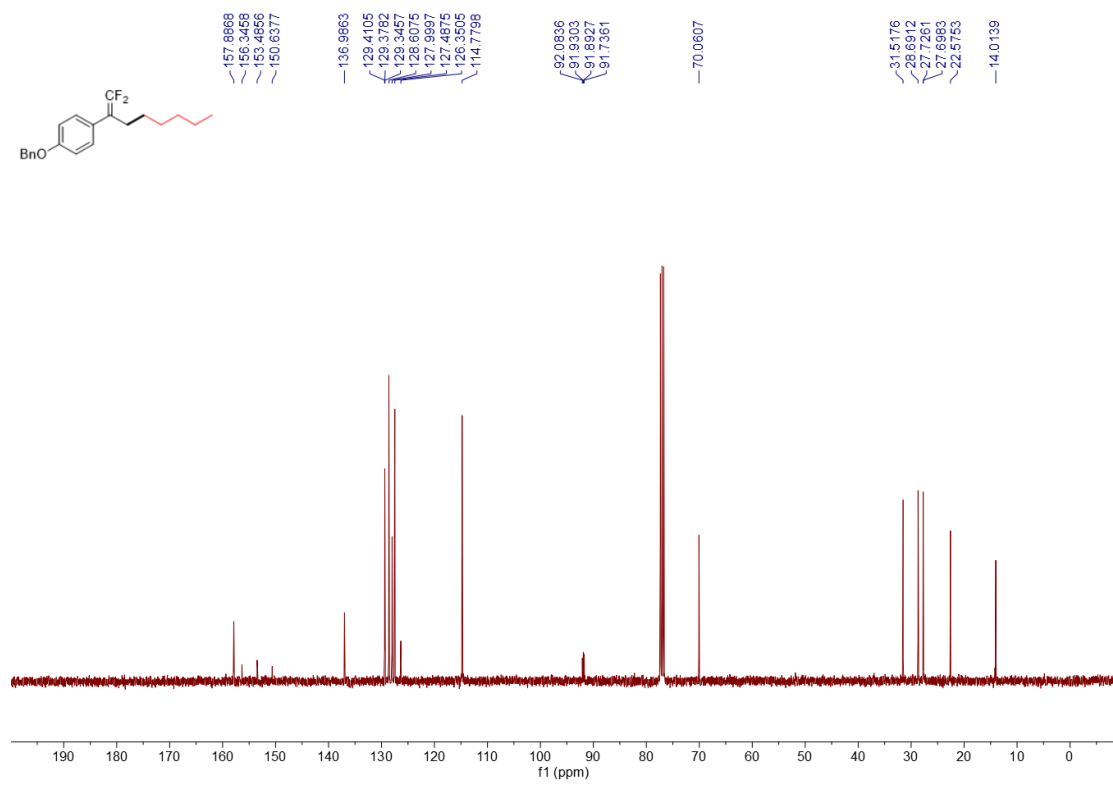

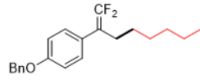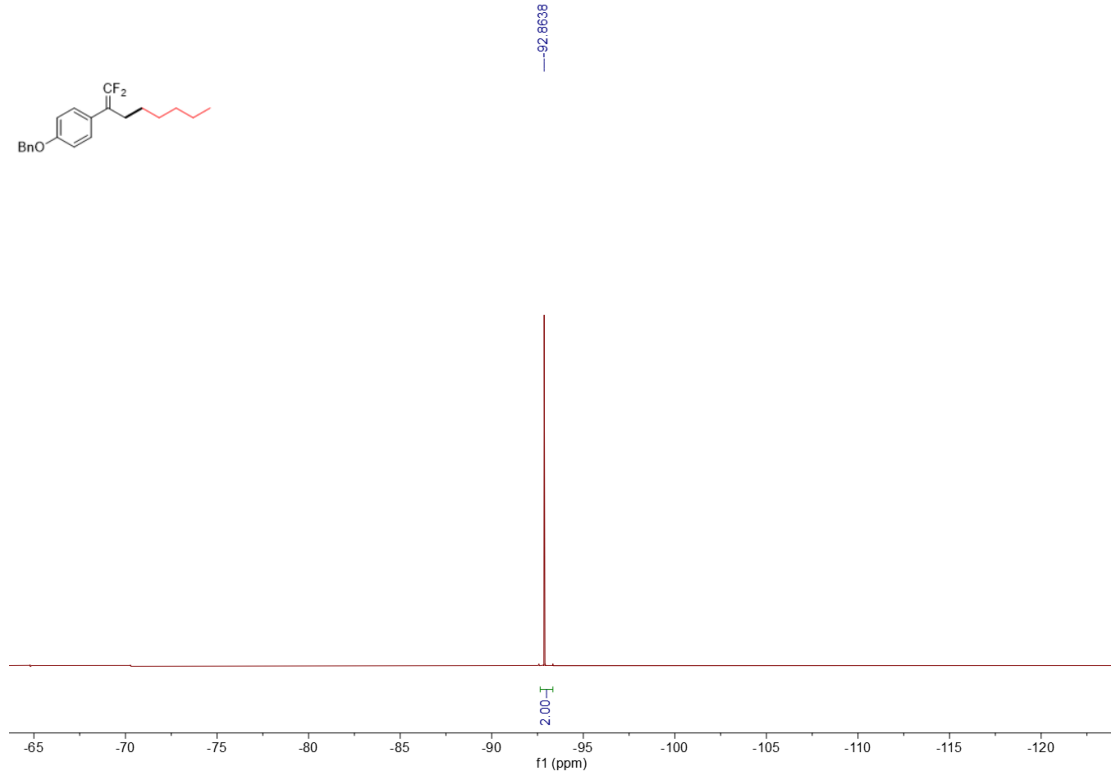

### NMR spectrum of 52

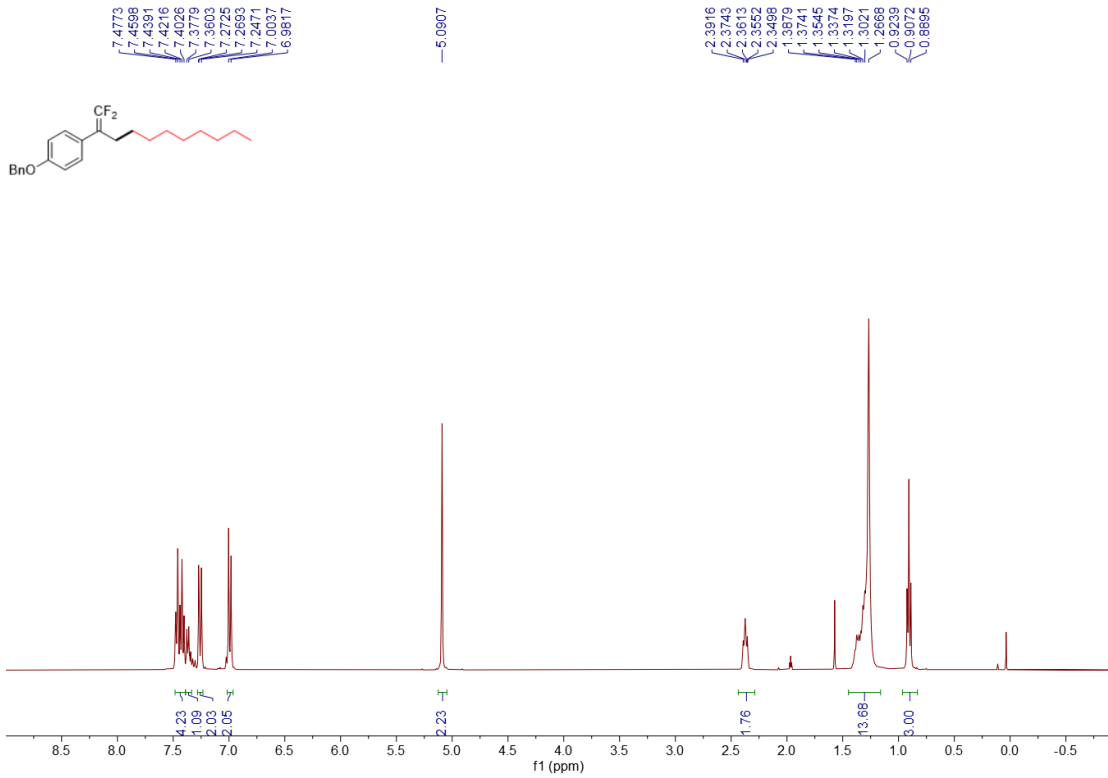

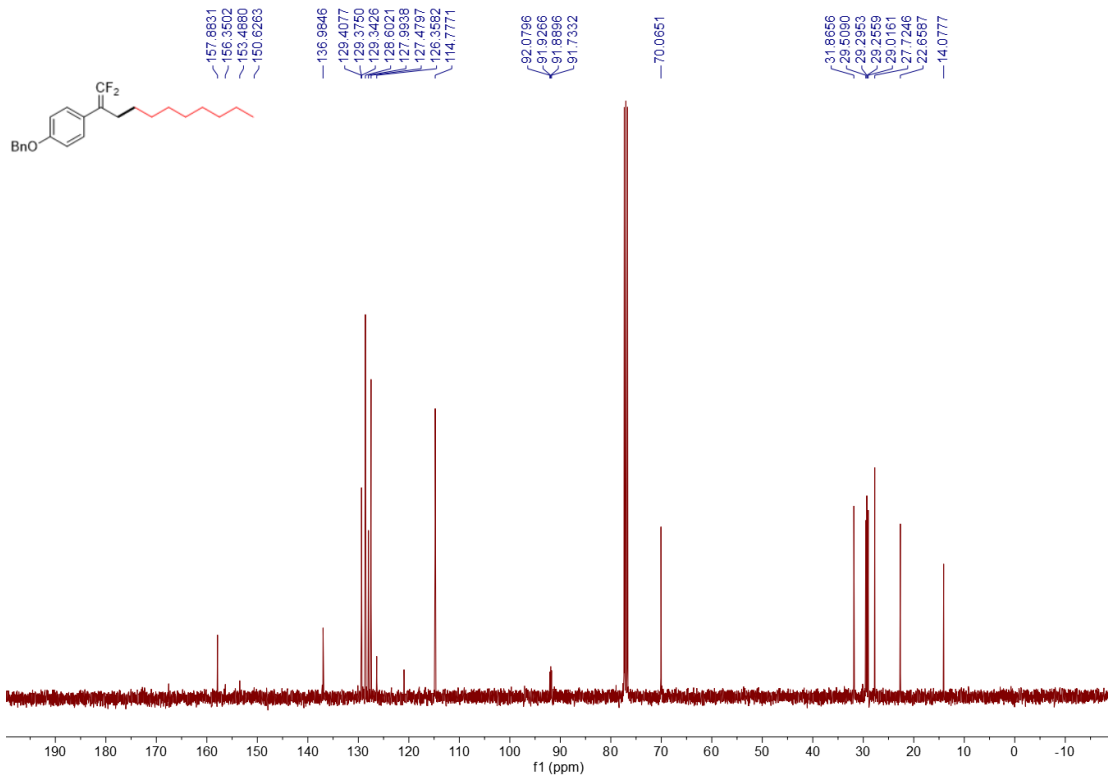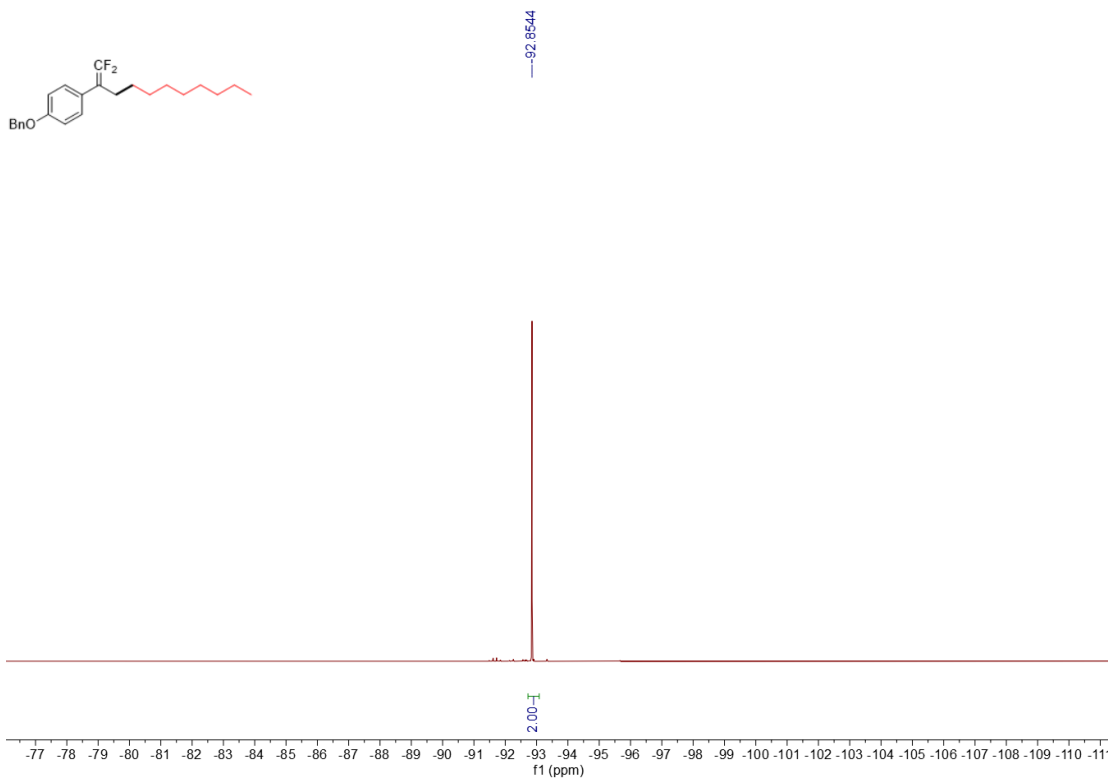



# NMR spectrum of 53

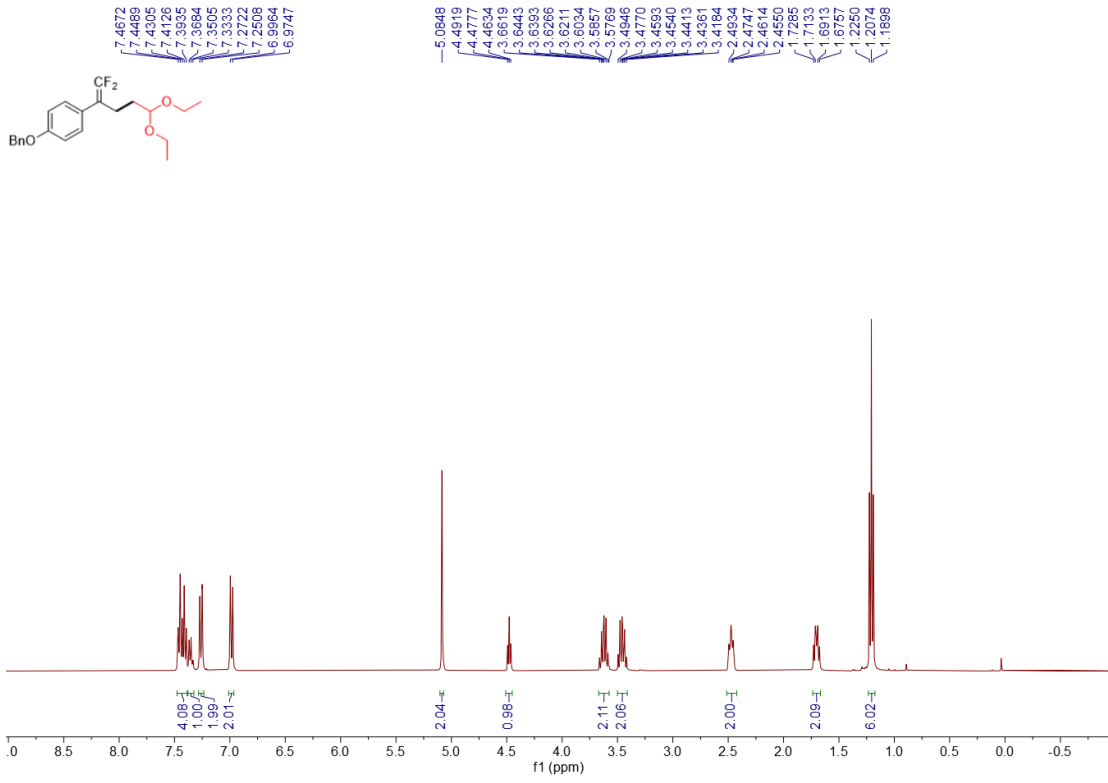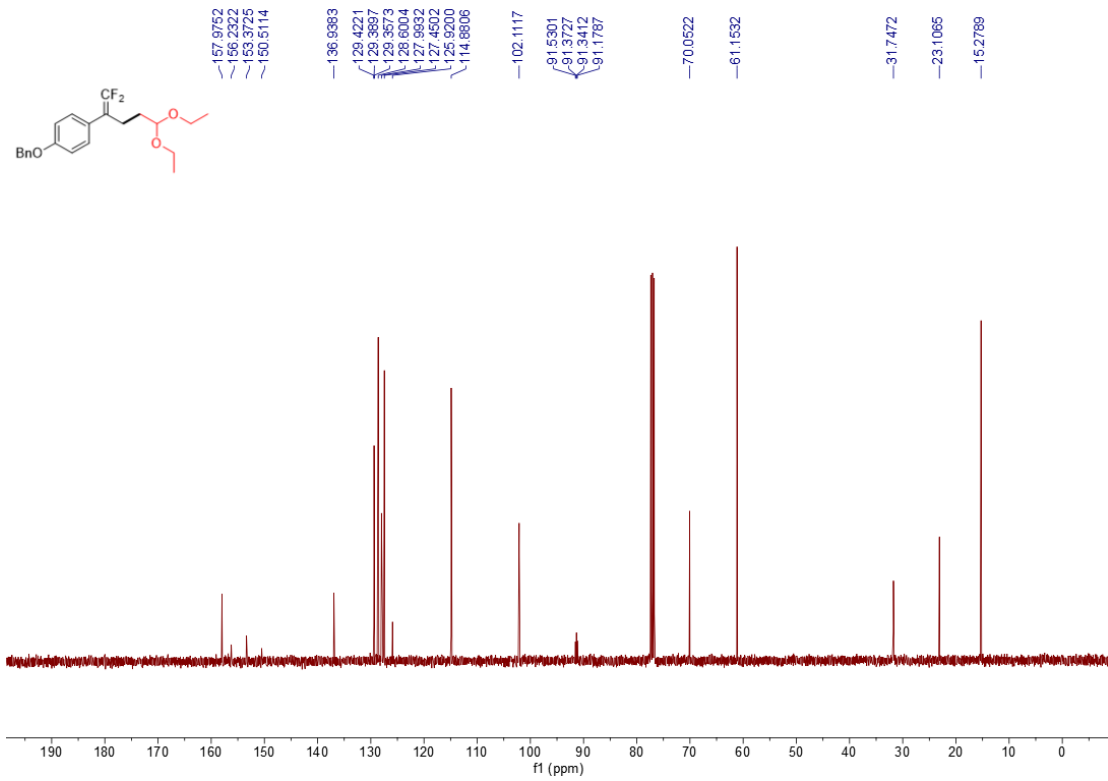

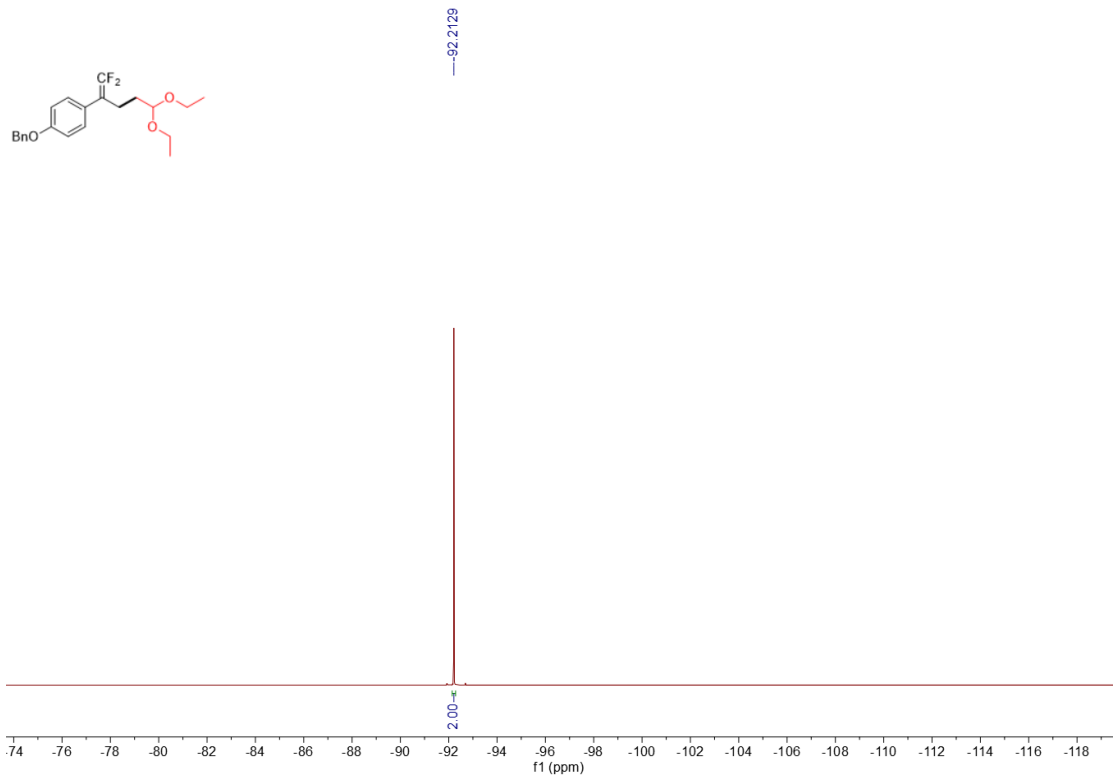

### NMR spectrum of 54

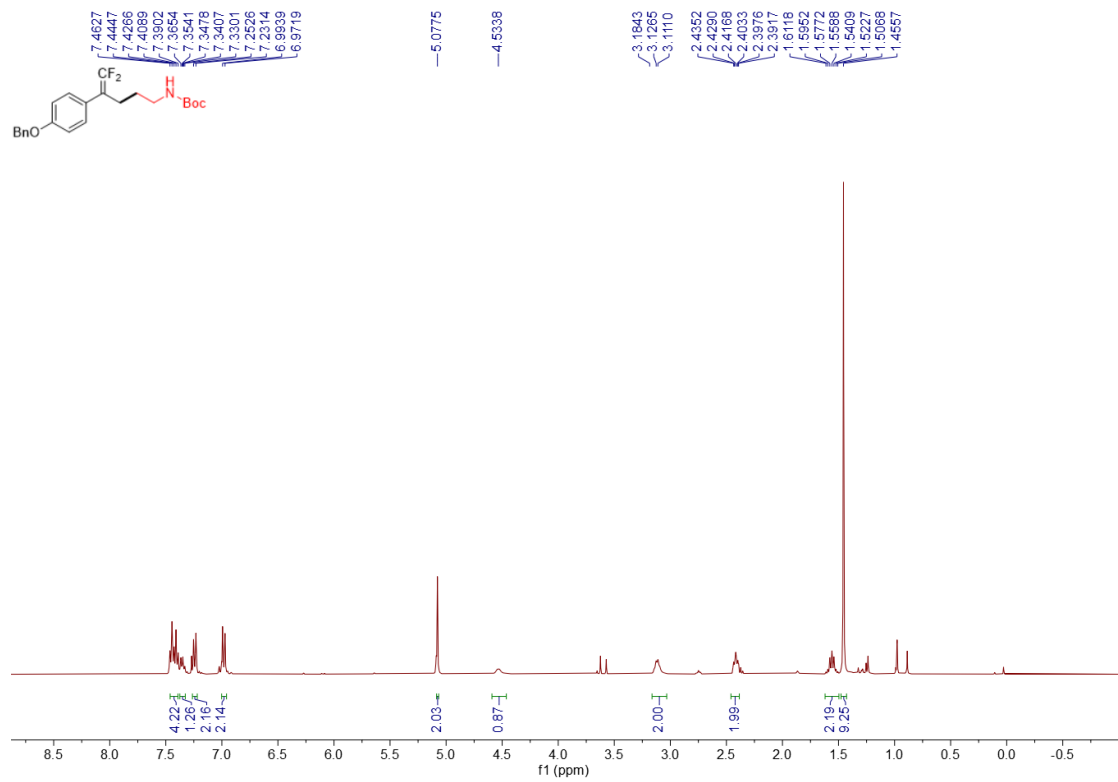

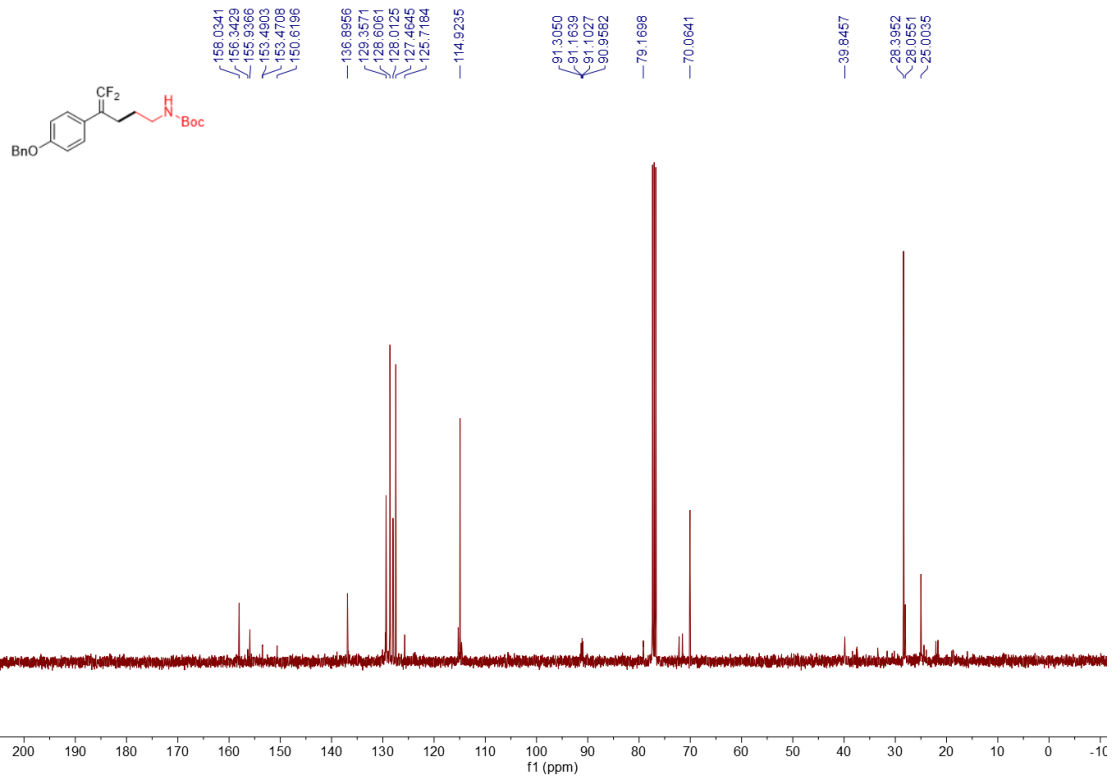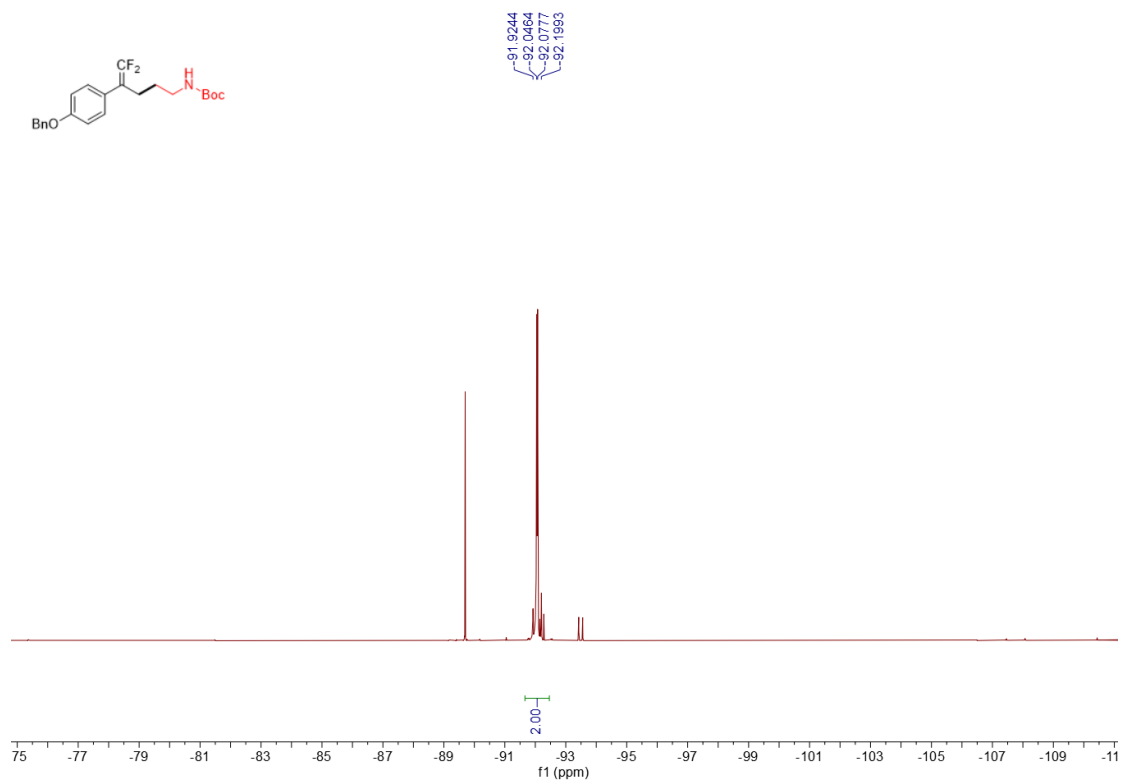

# NMR spectrum of 55

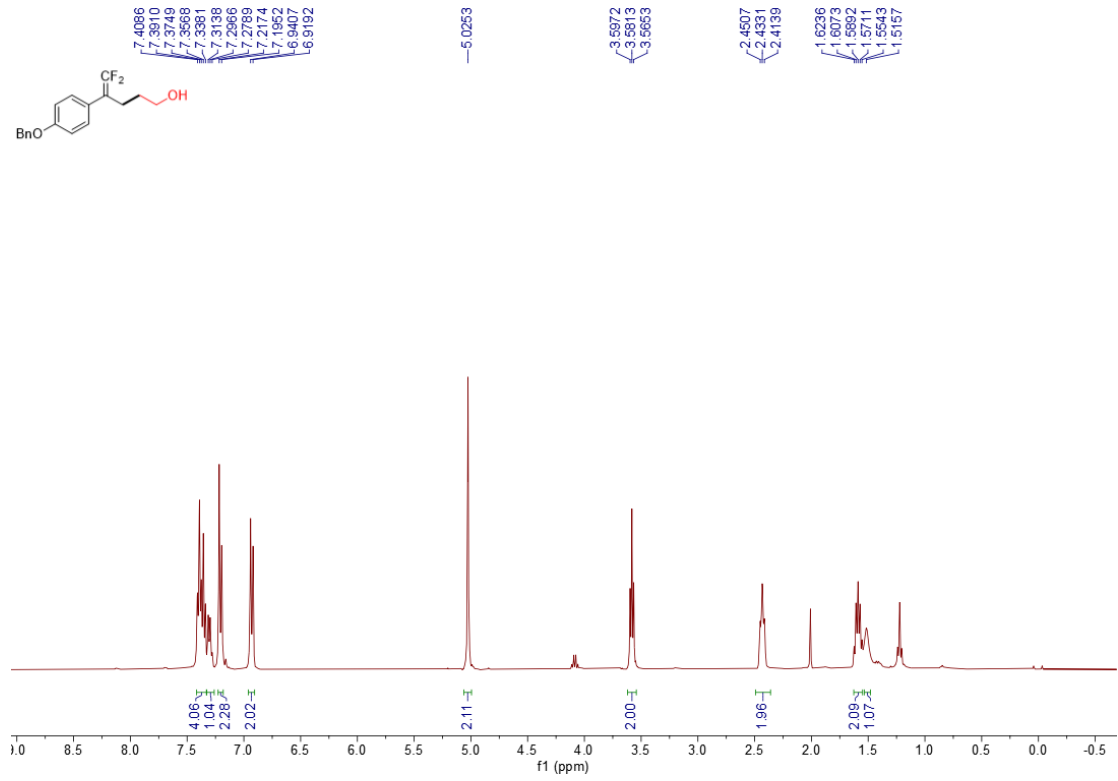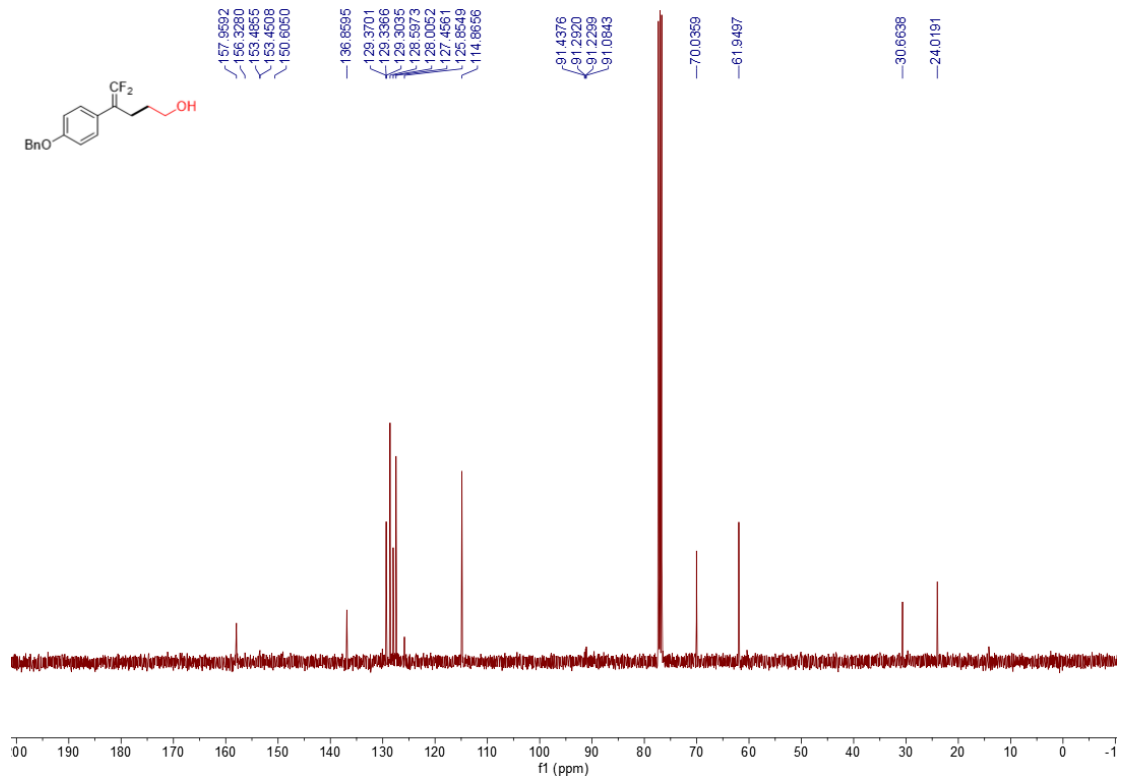

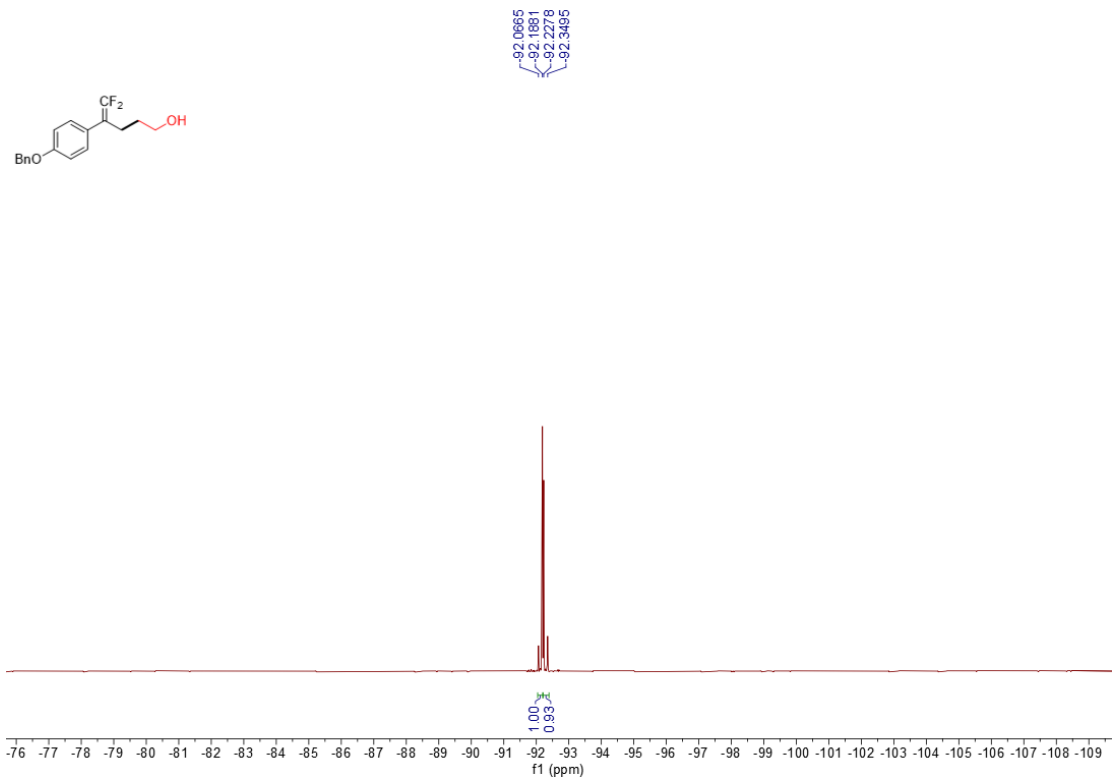

### NMR spectrum of 56

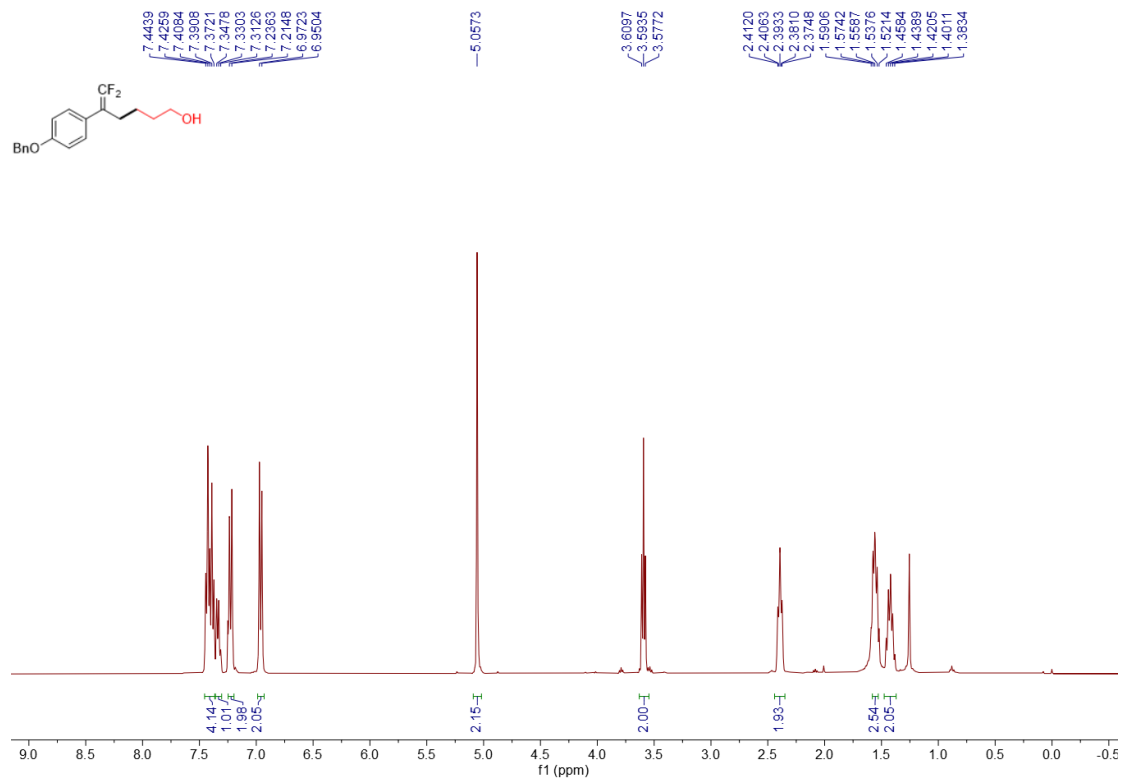

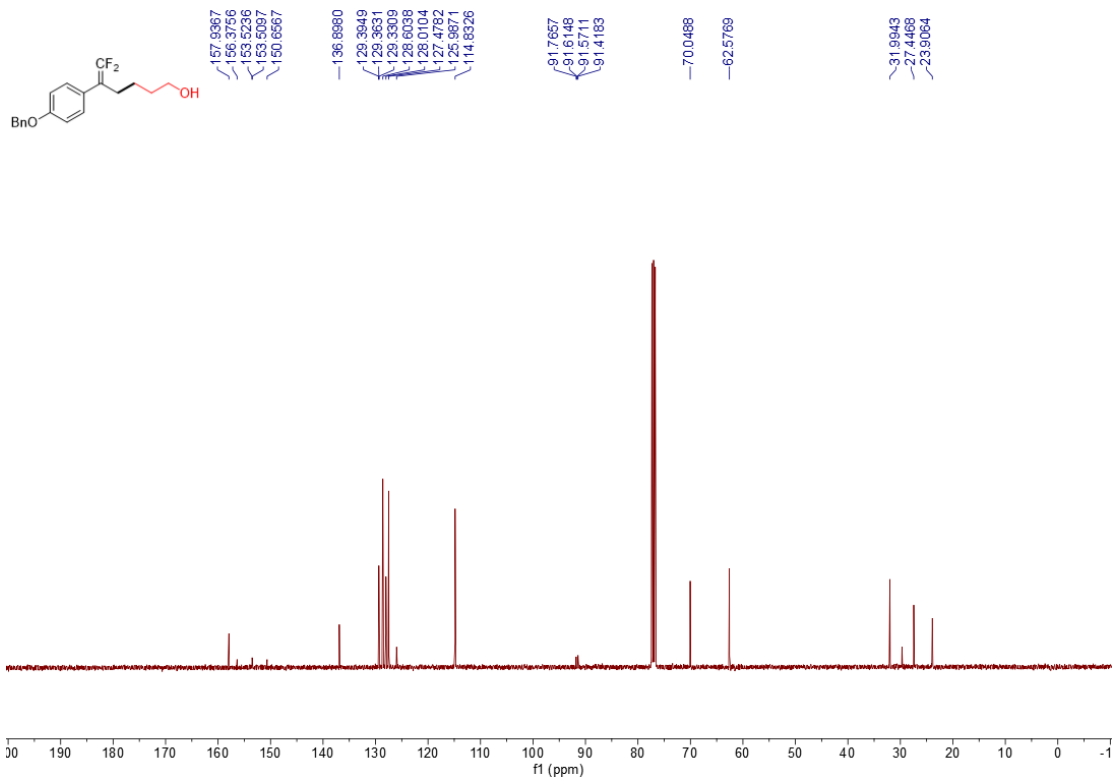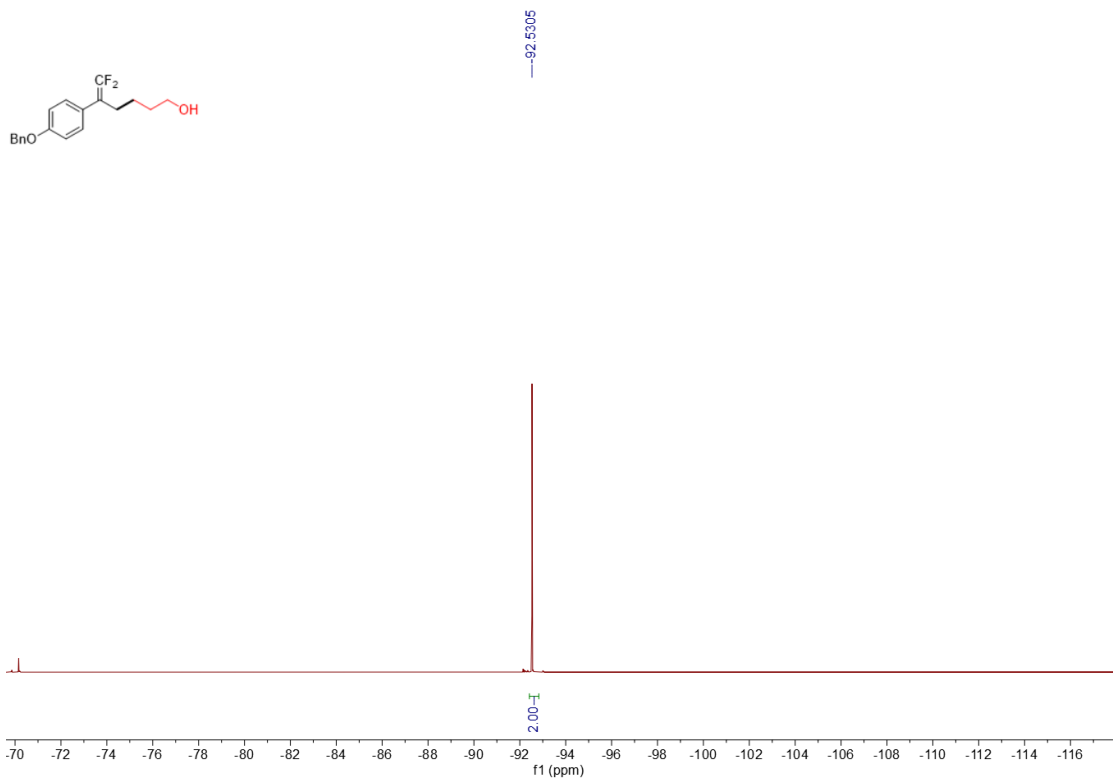

# NMR spectrum of 57

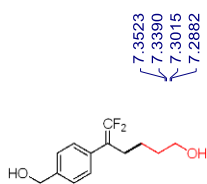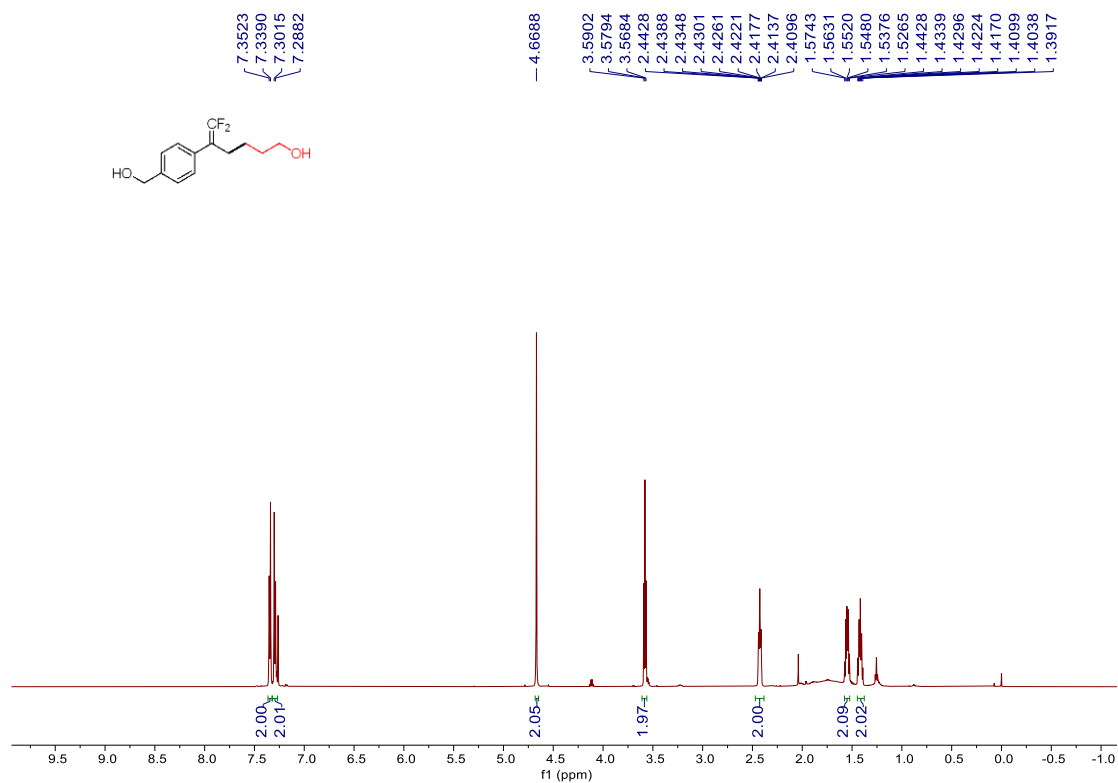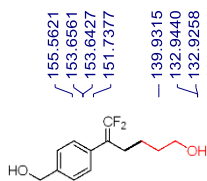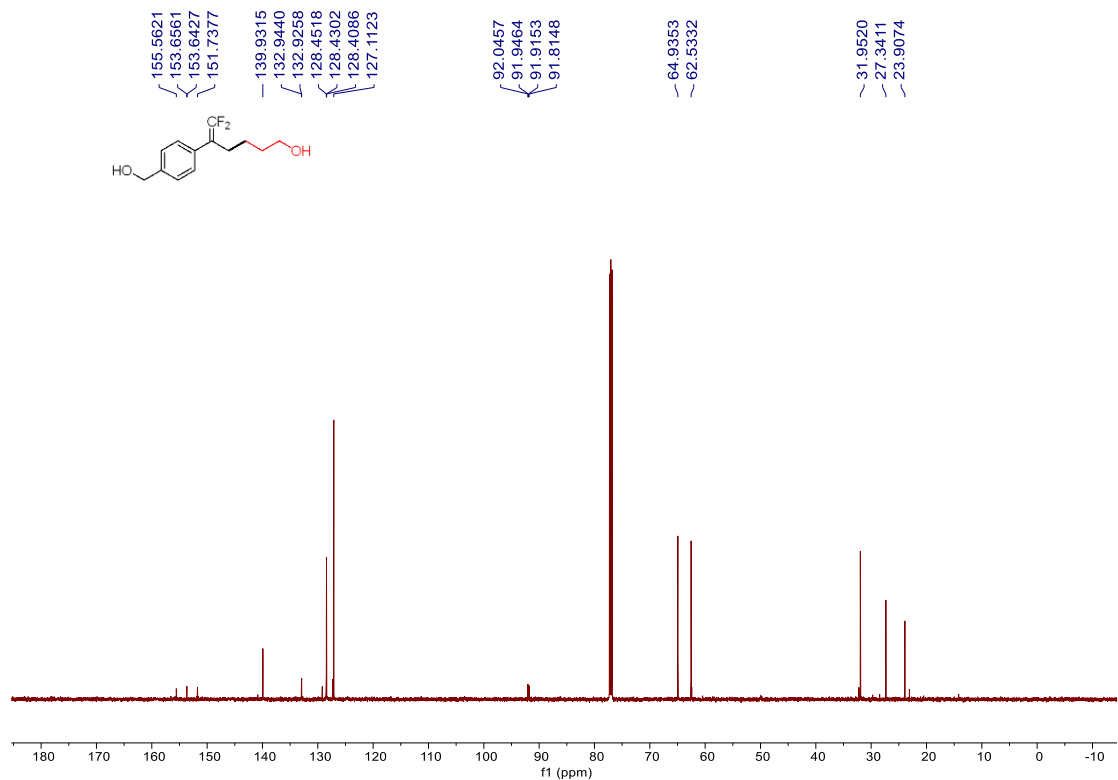





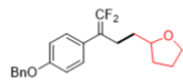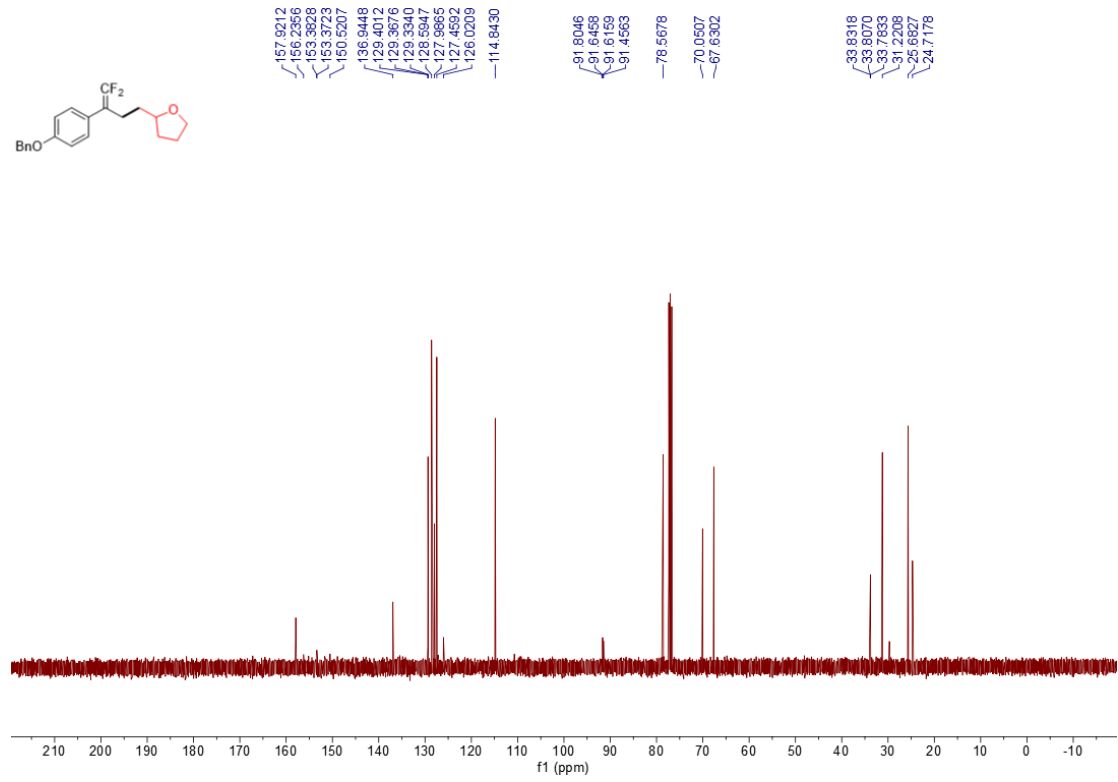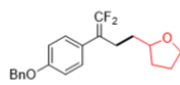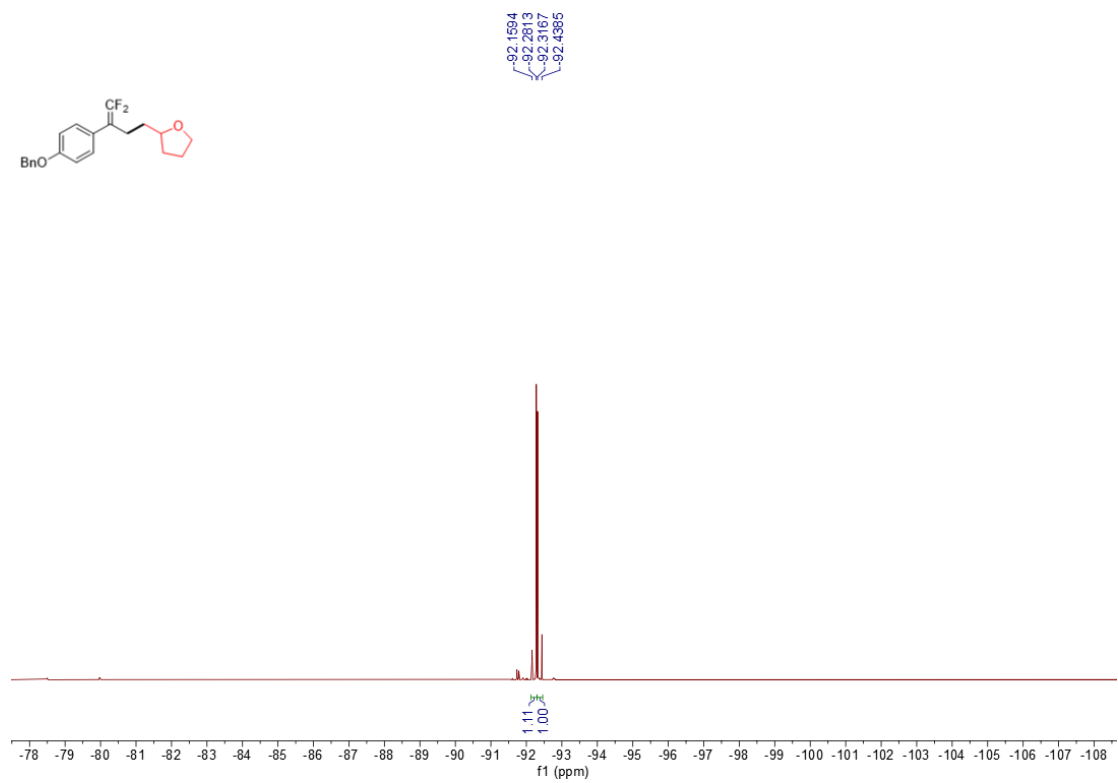

# NMR spectrum of 59

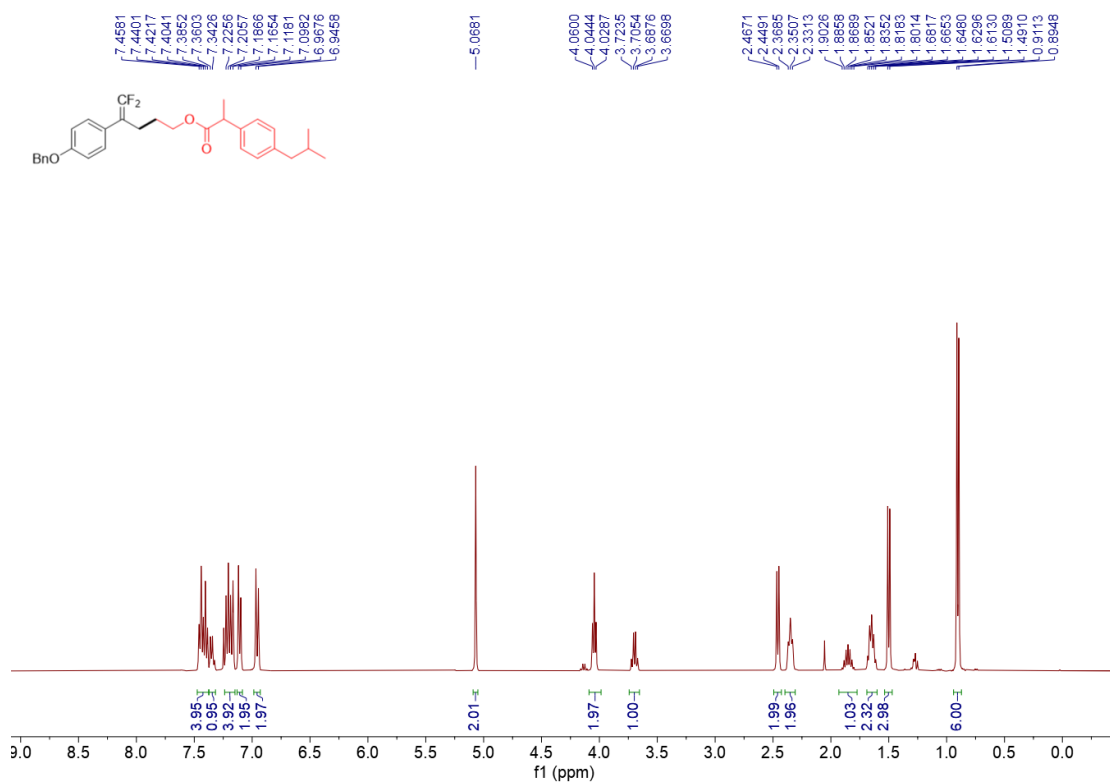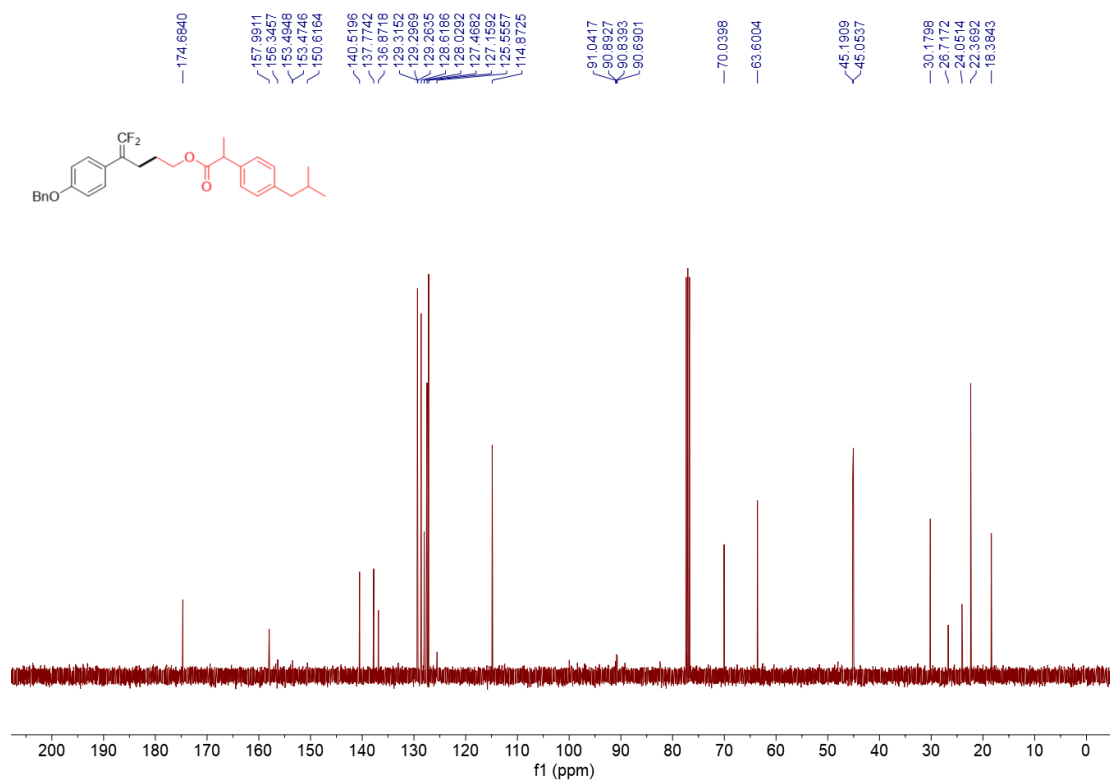

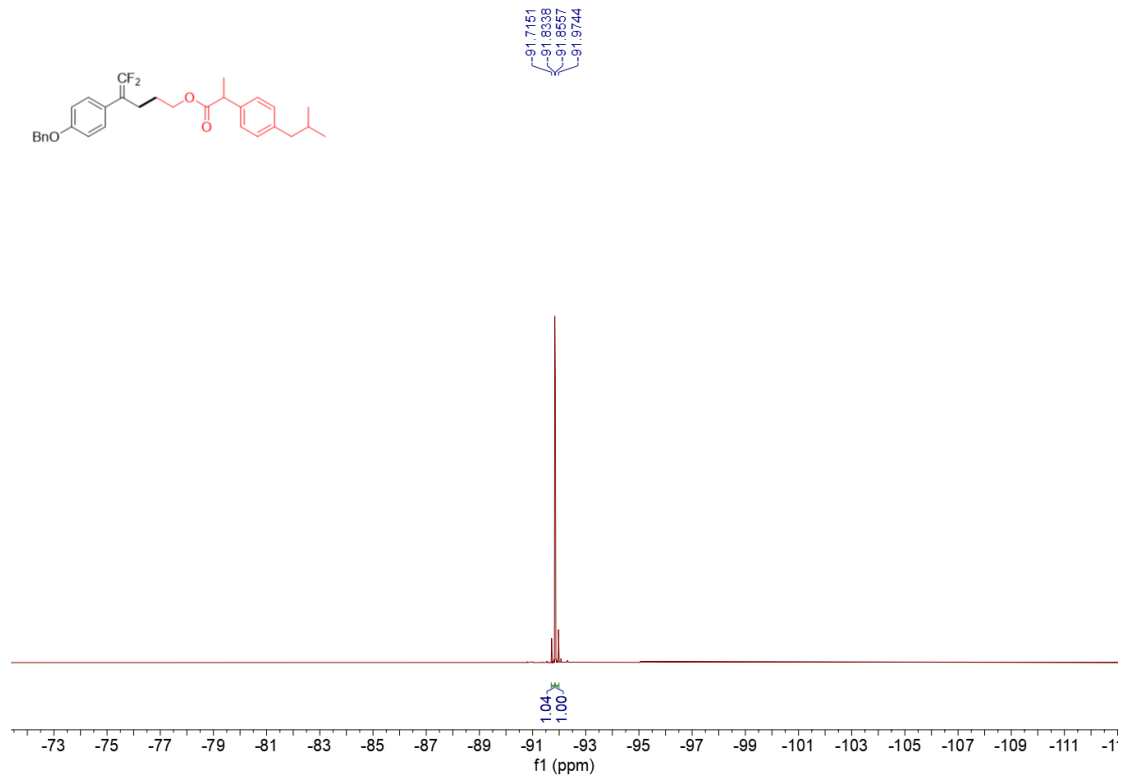

### NMR spectrum of 60

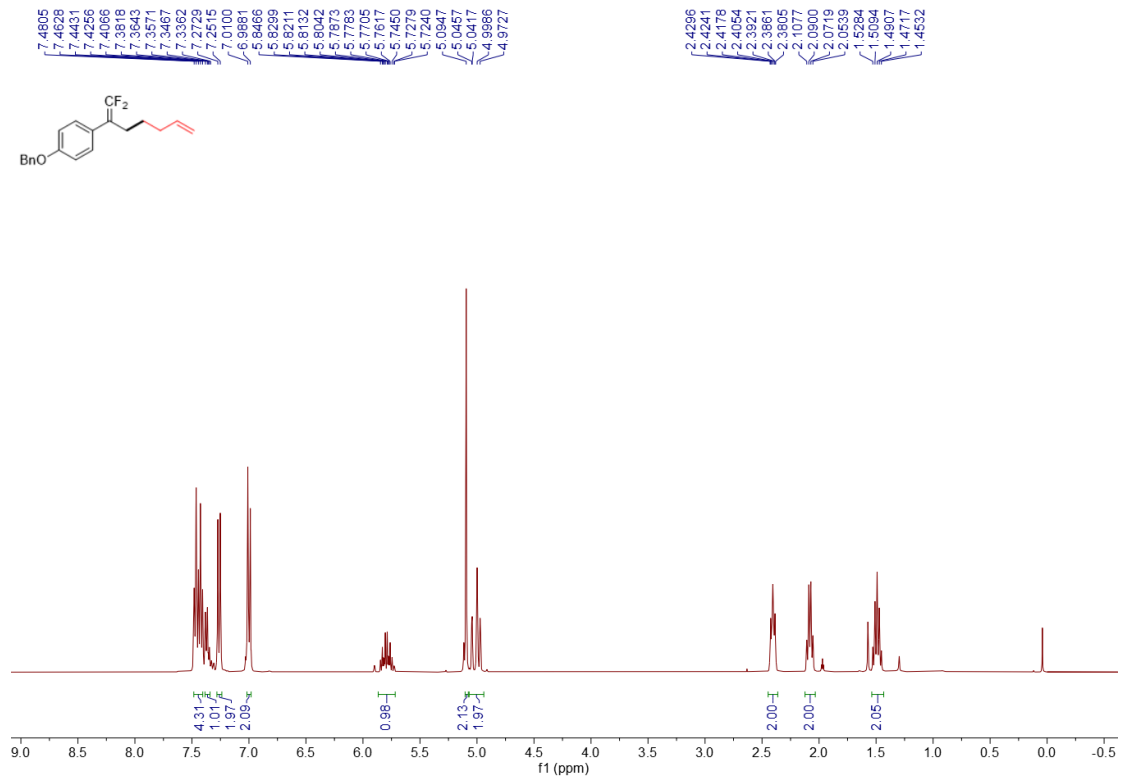

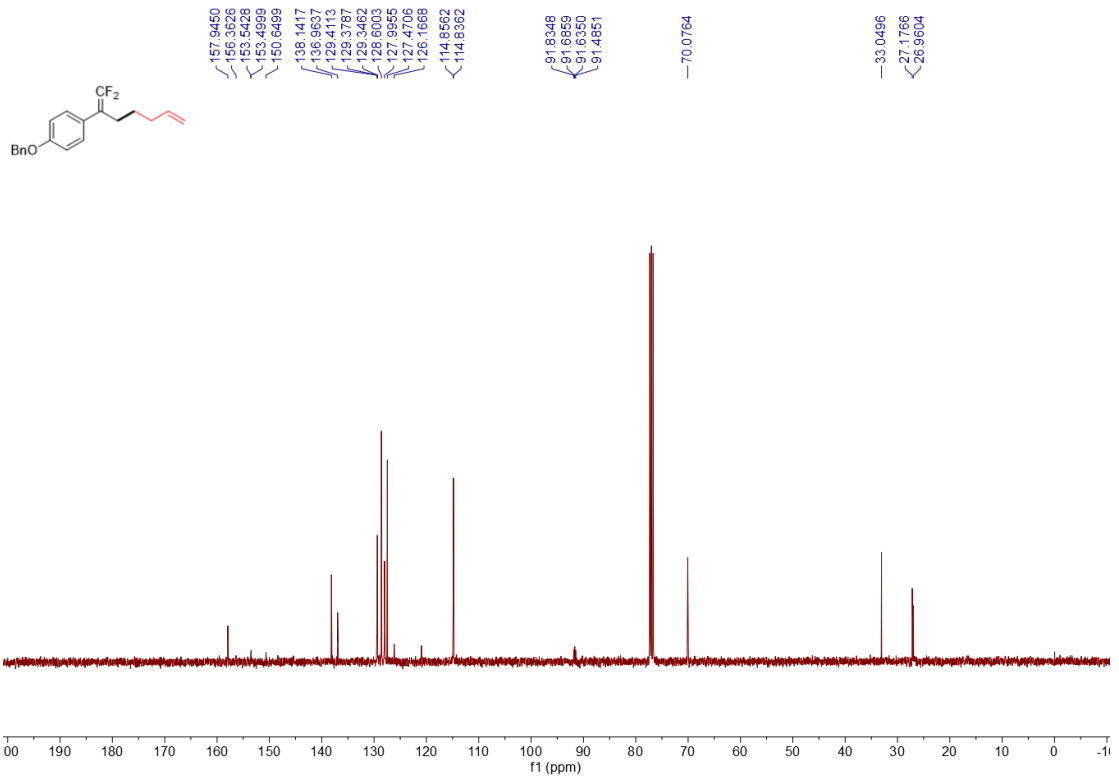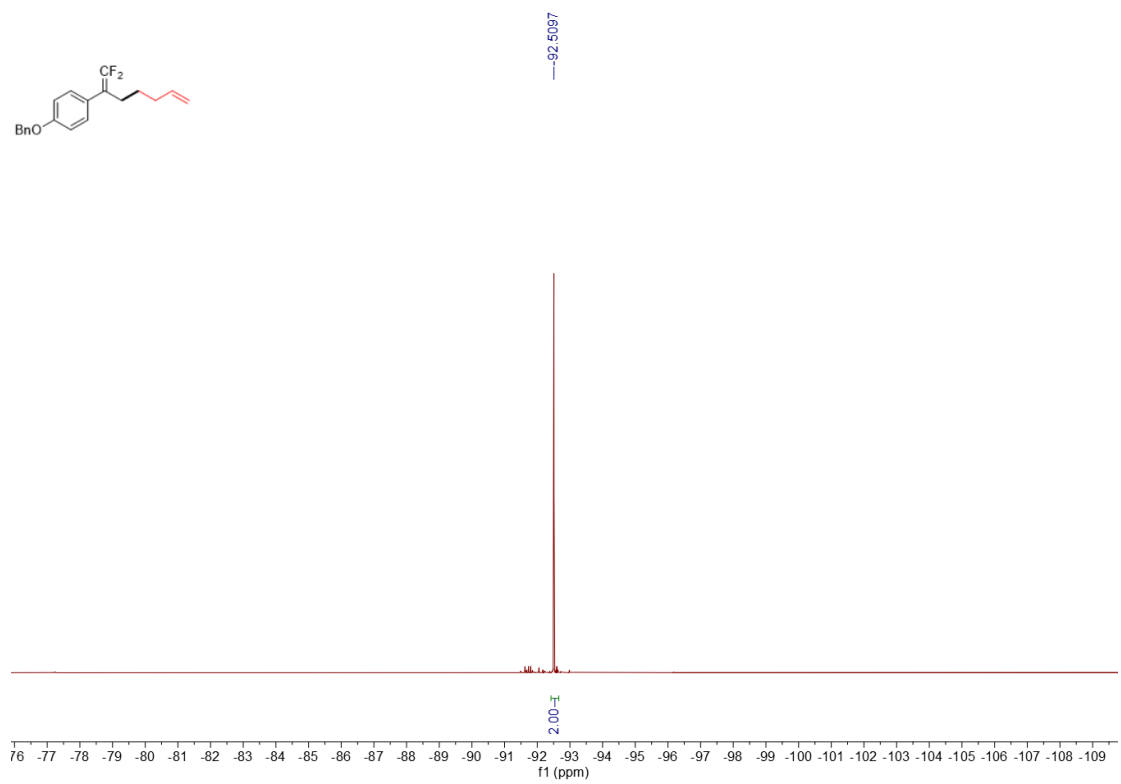

# NMR spectrum of 61

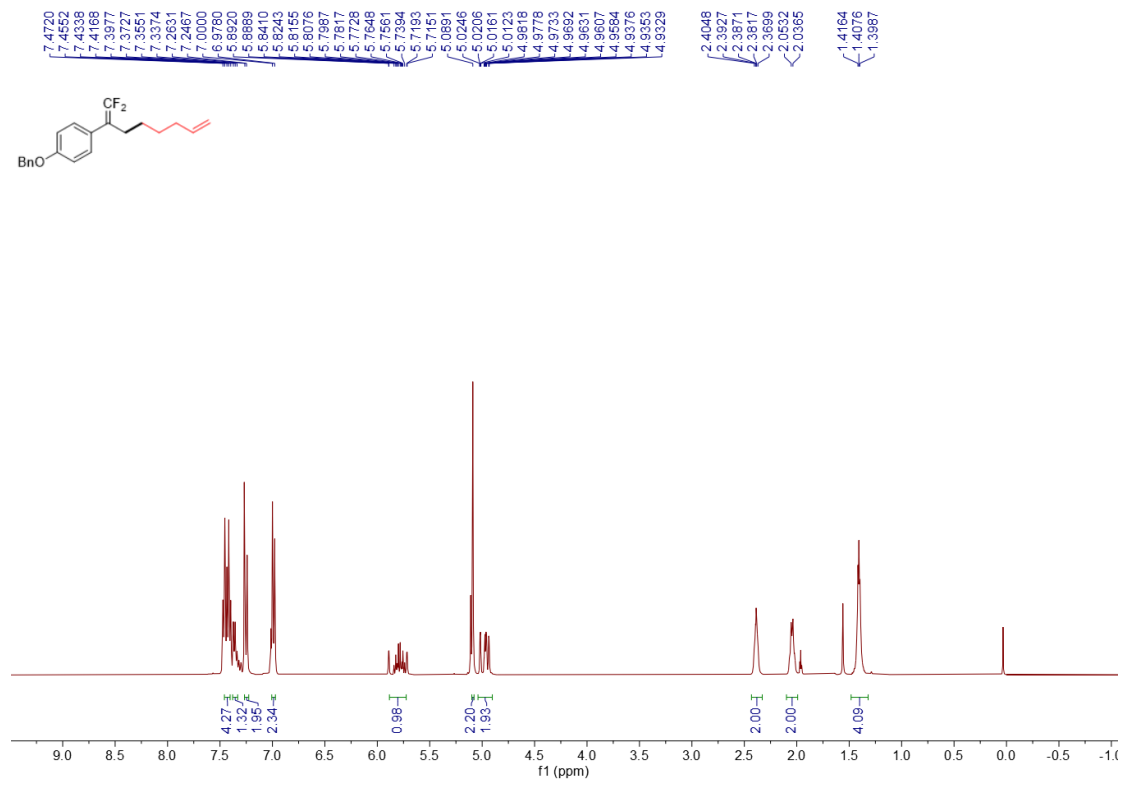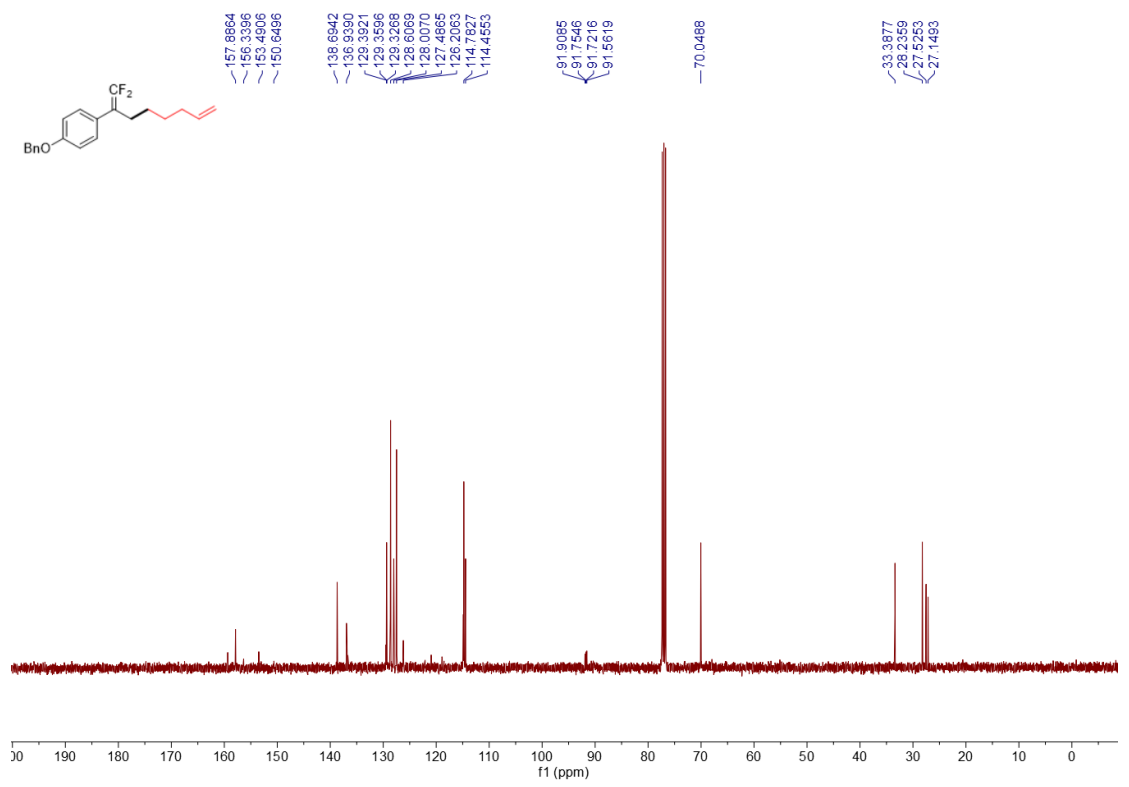

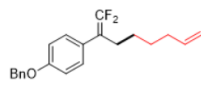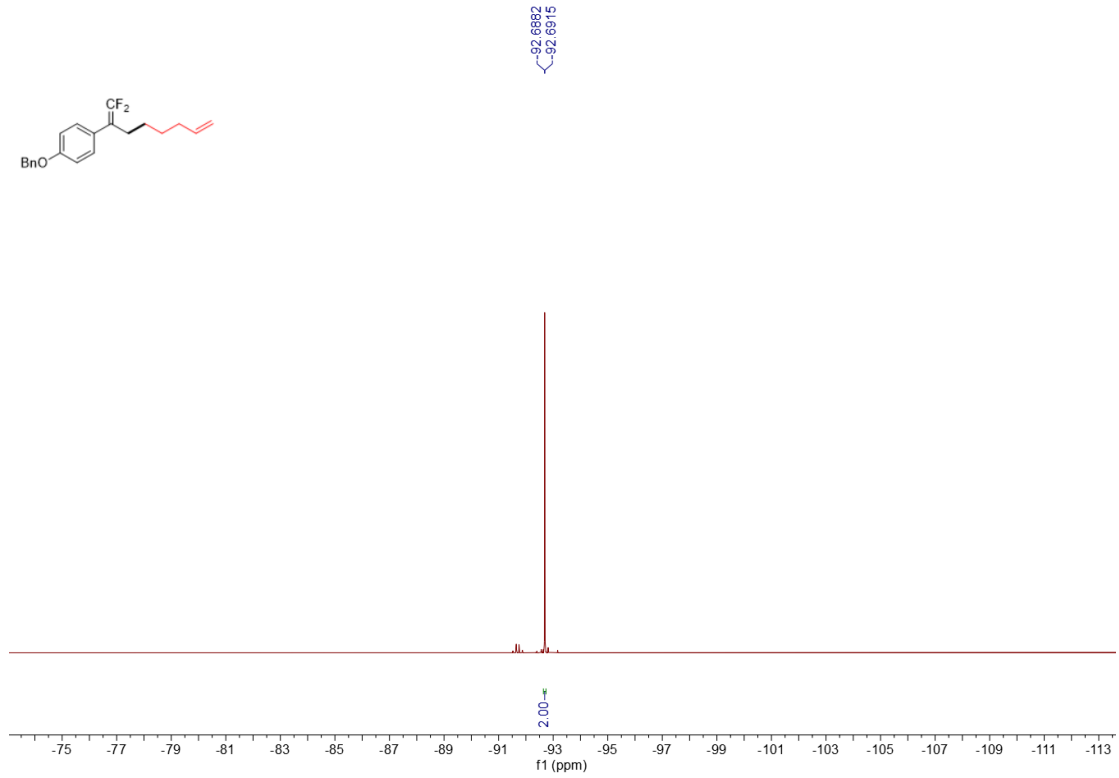

### NMR spectrum of 62

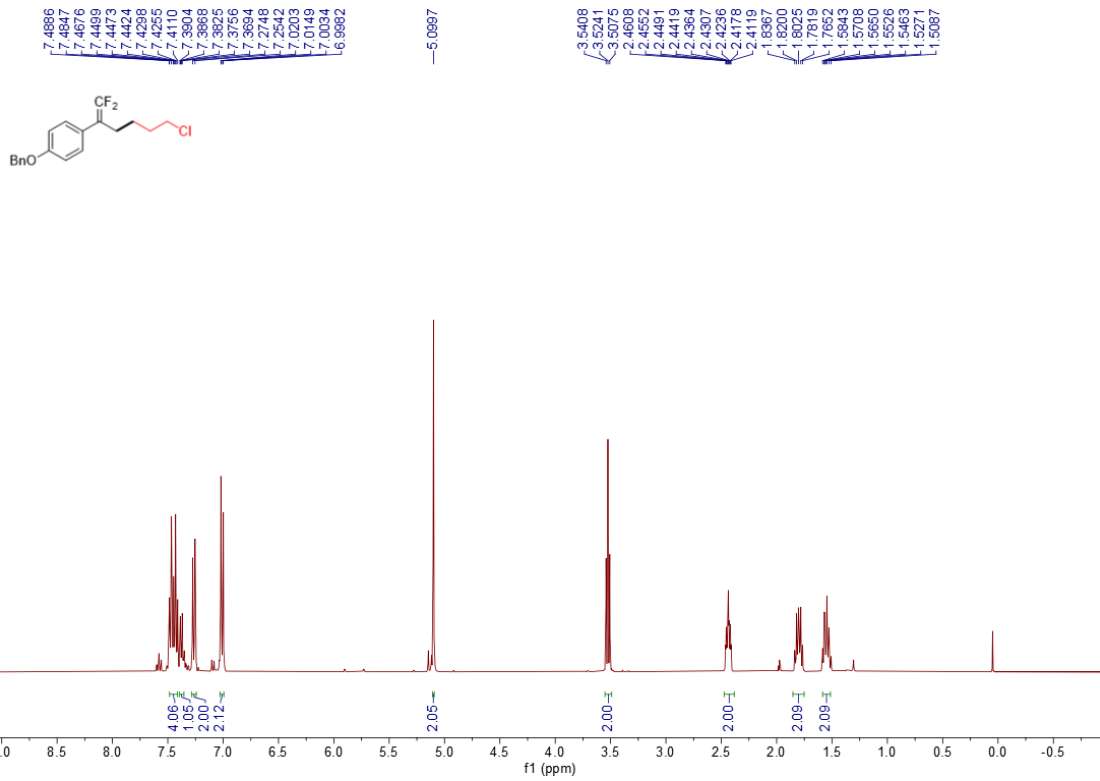

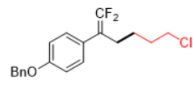

158.0447  
157.6429  
155.5664  
150.7209

136.9205

129.4054  
129.3737  
129.3416  
128.6260  
128.0344  
127.4963  
125.8040  
114.9168

91.5464  
91.4055  
91.3375  
91.1961

70.0799

44.5673

31.8067  
26.9689  
24.9588

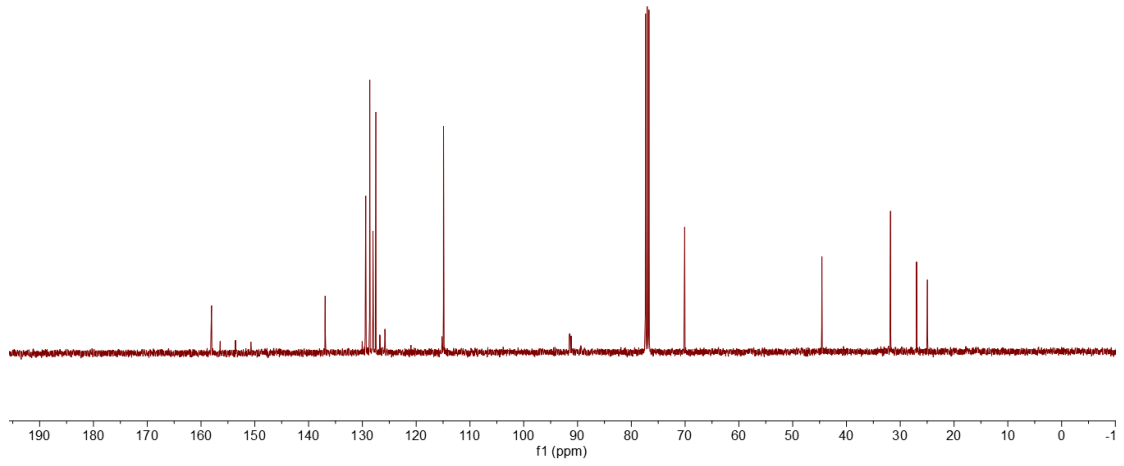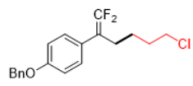

92.0708  
92.1928  
92.2439  
92.3662

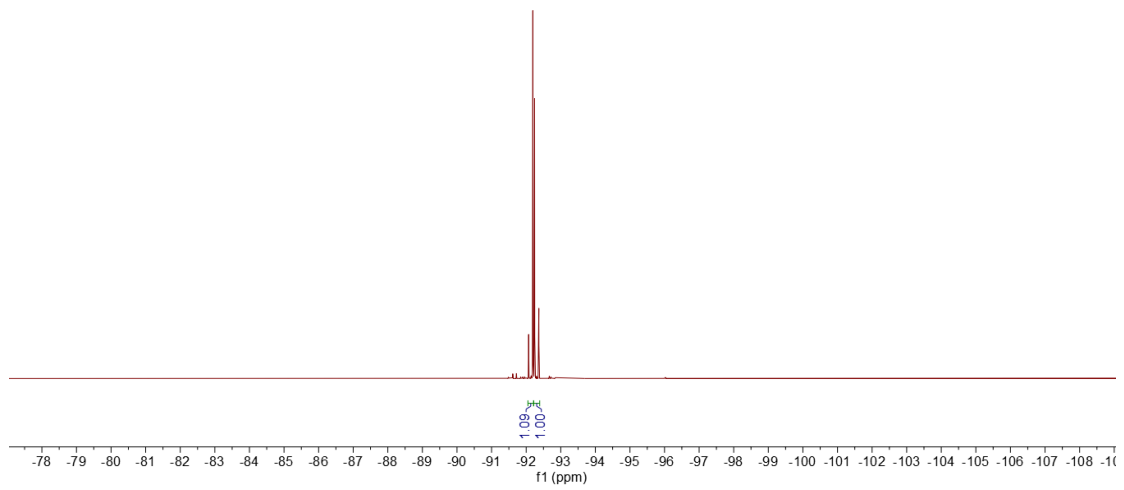

# NMR spectrum of 63

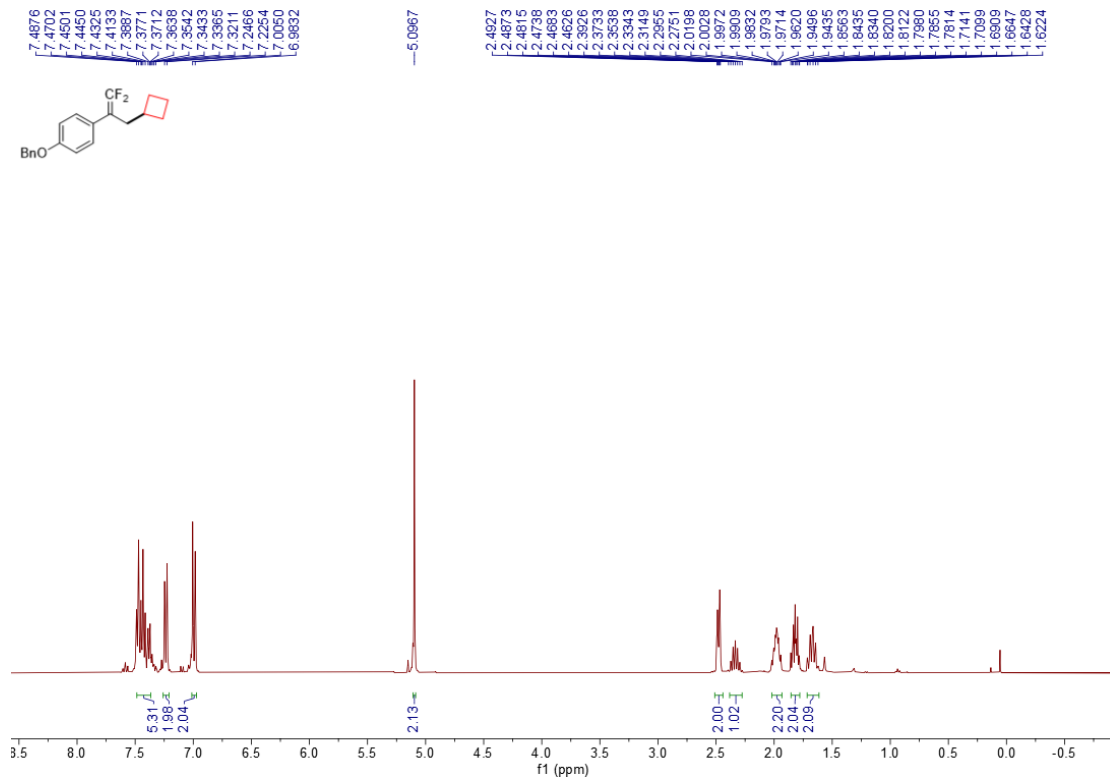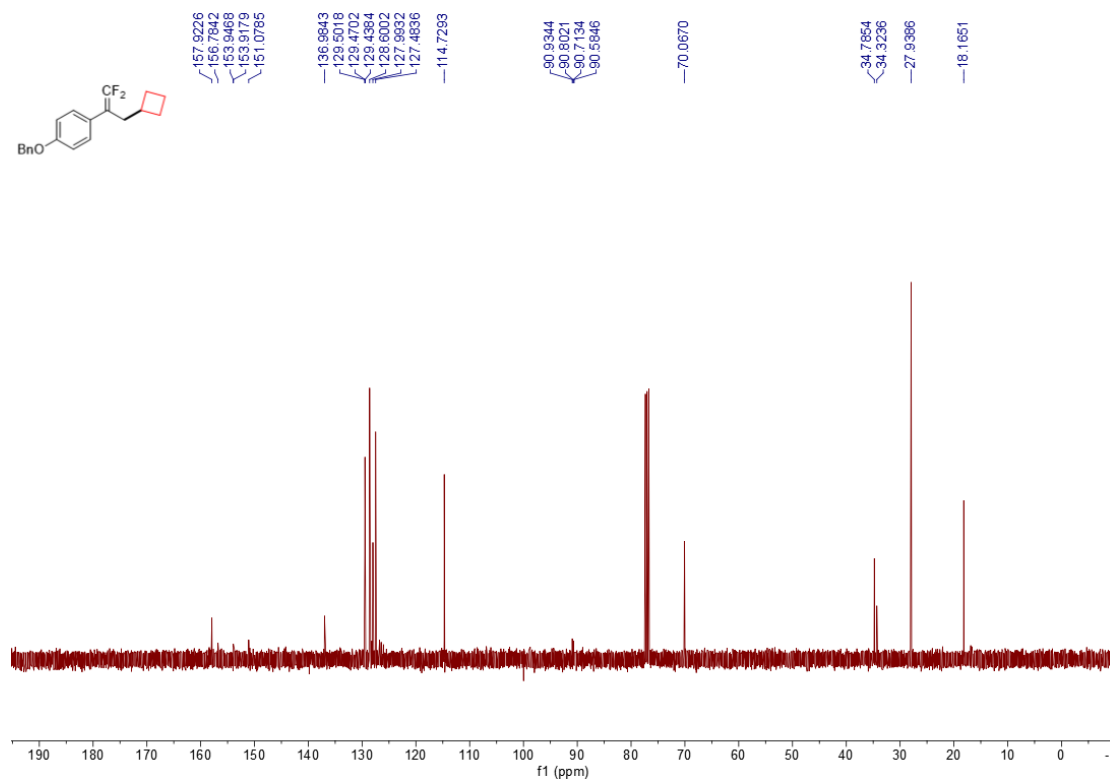



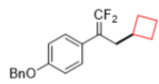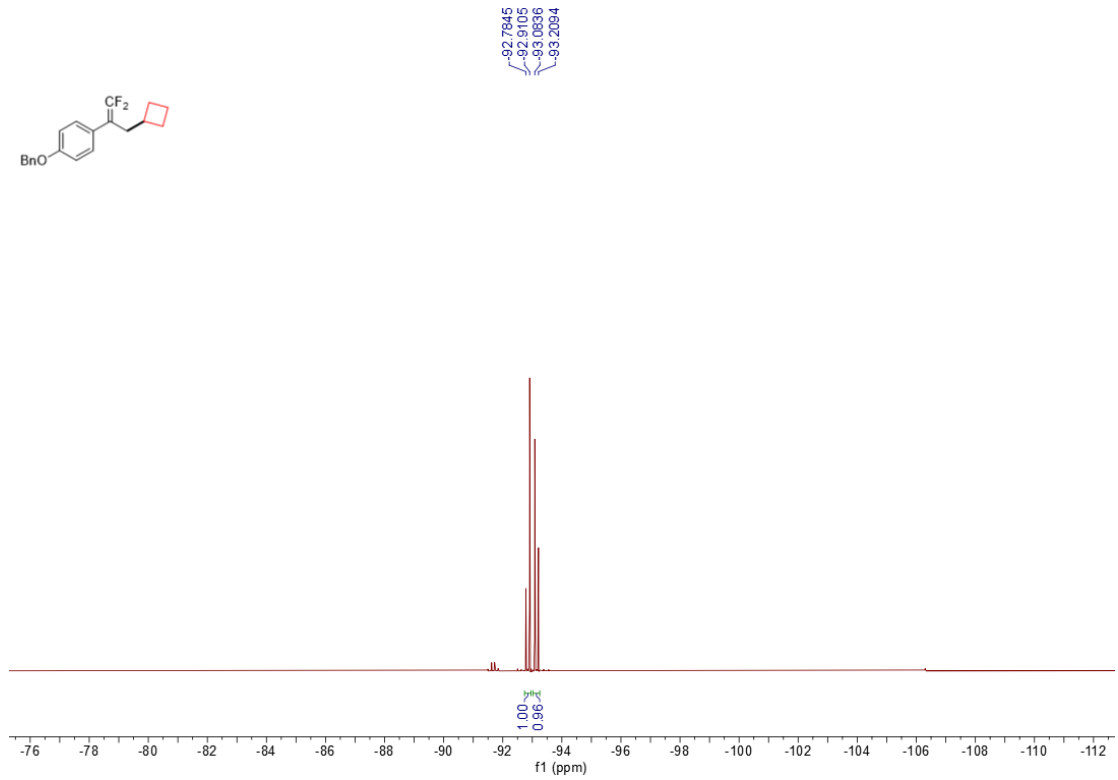

### NMR spectrum of 64

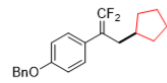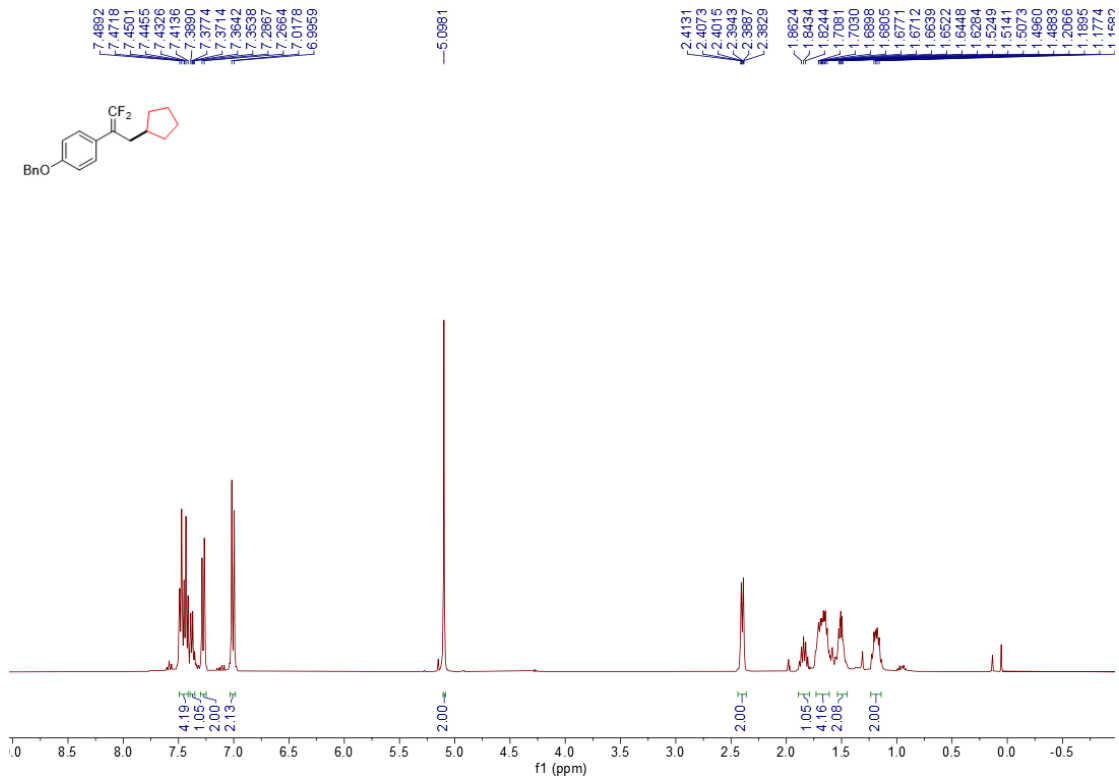

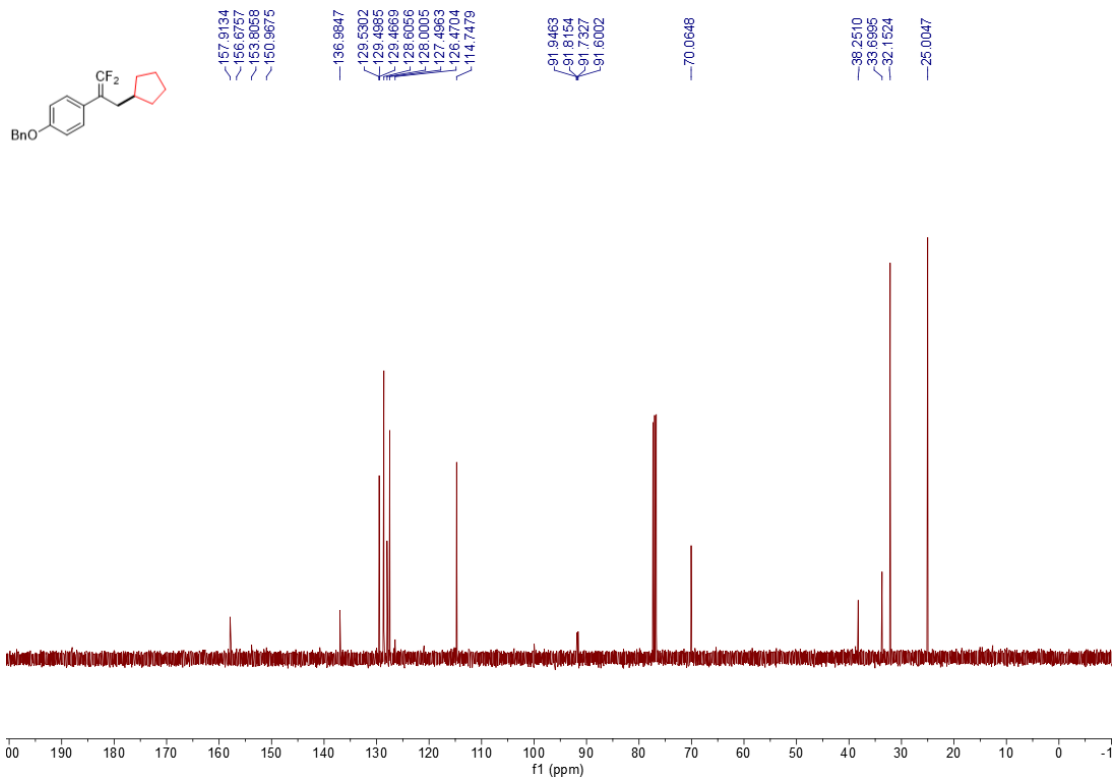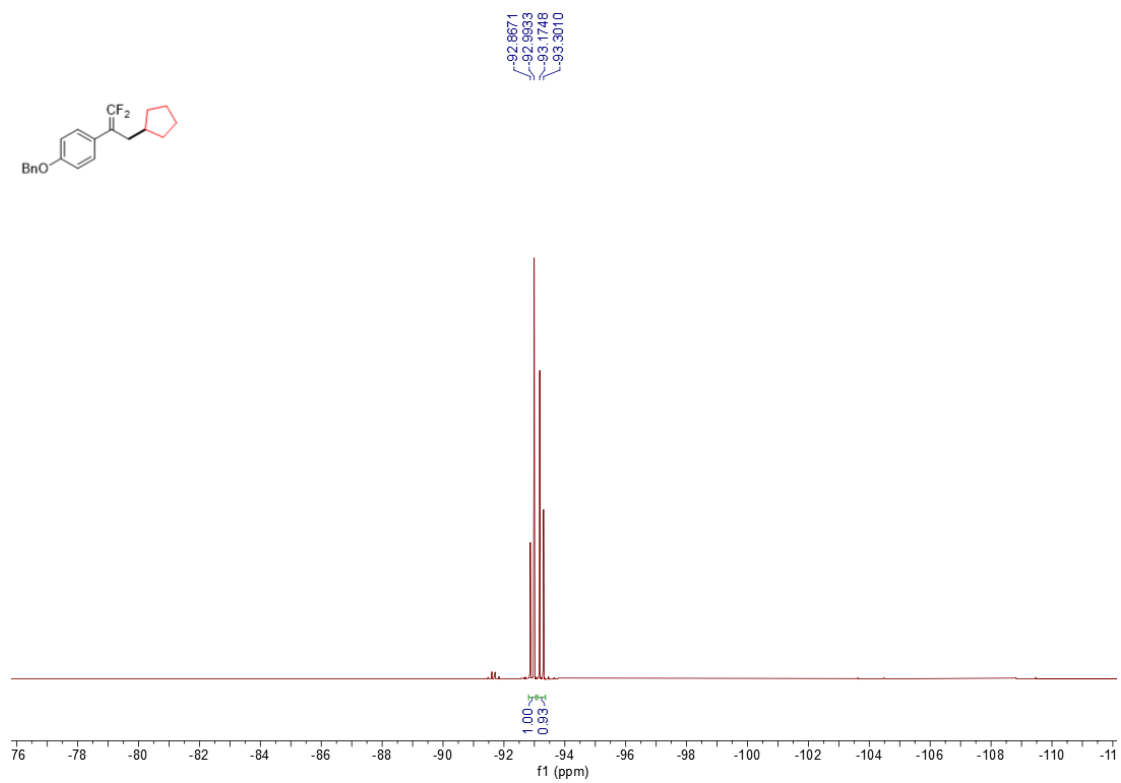

# NMR spectrum of 65

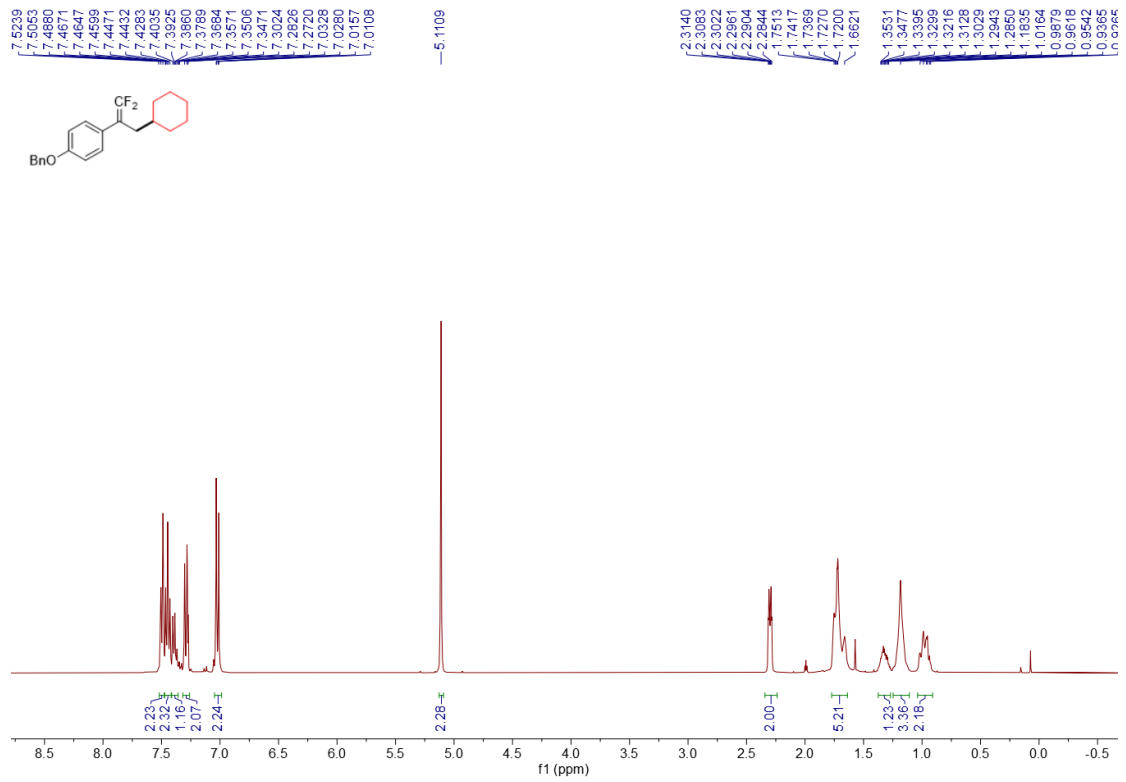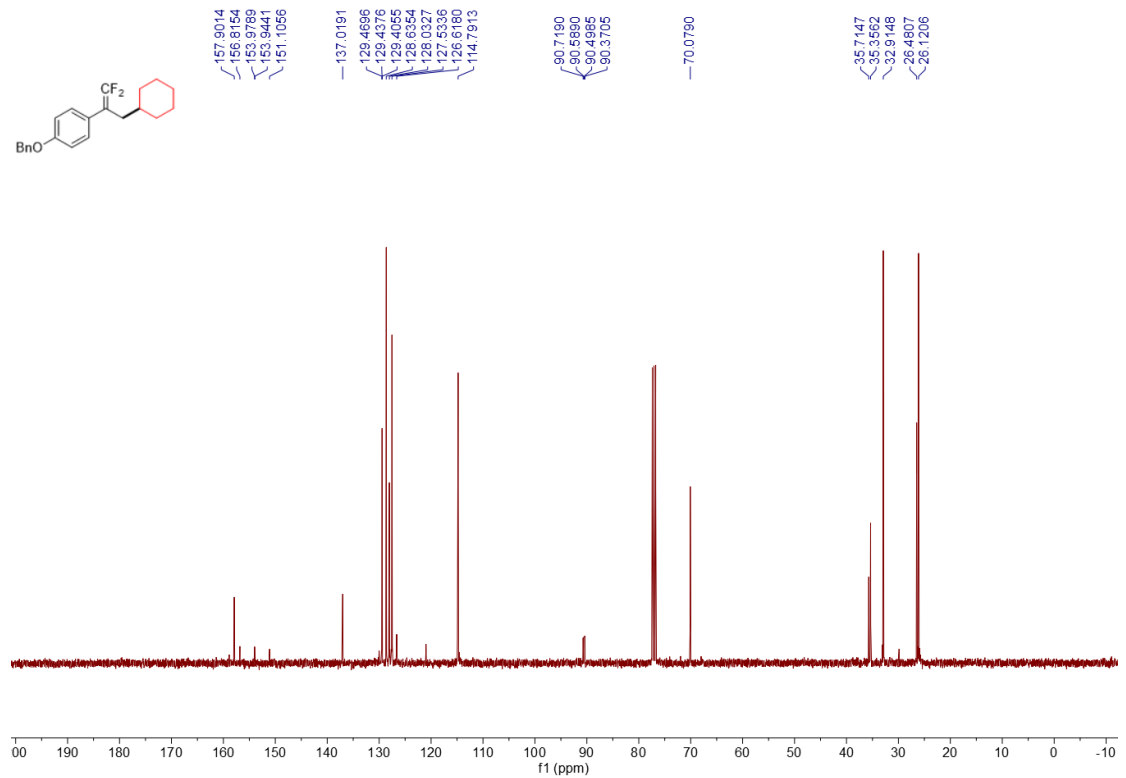

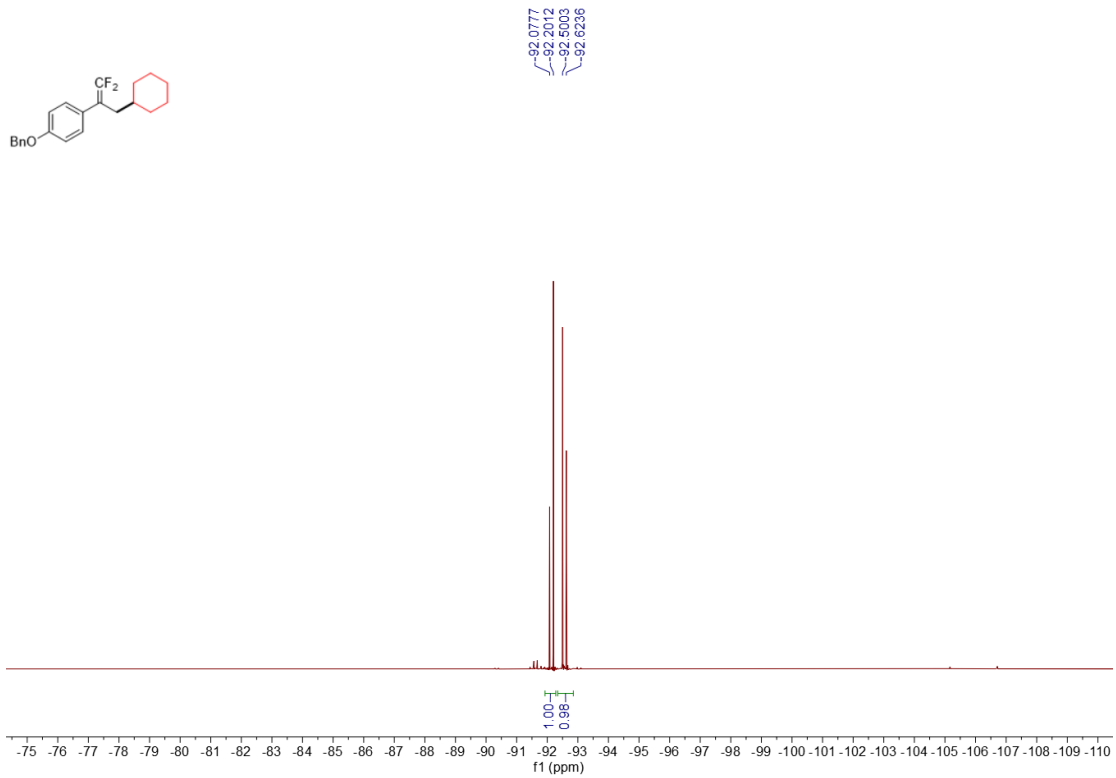

### NMR spectrum of 66

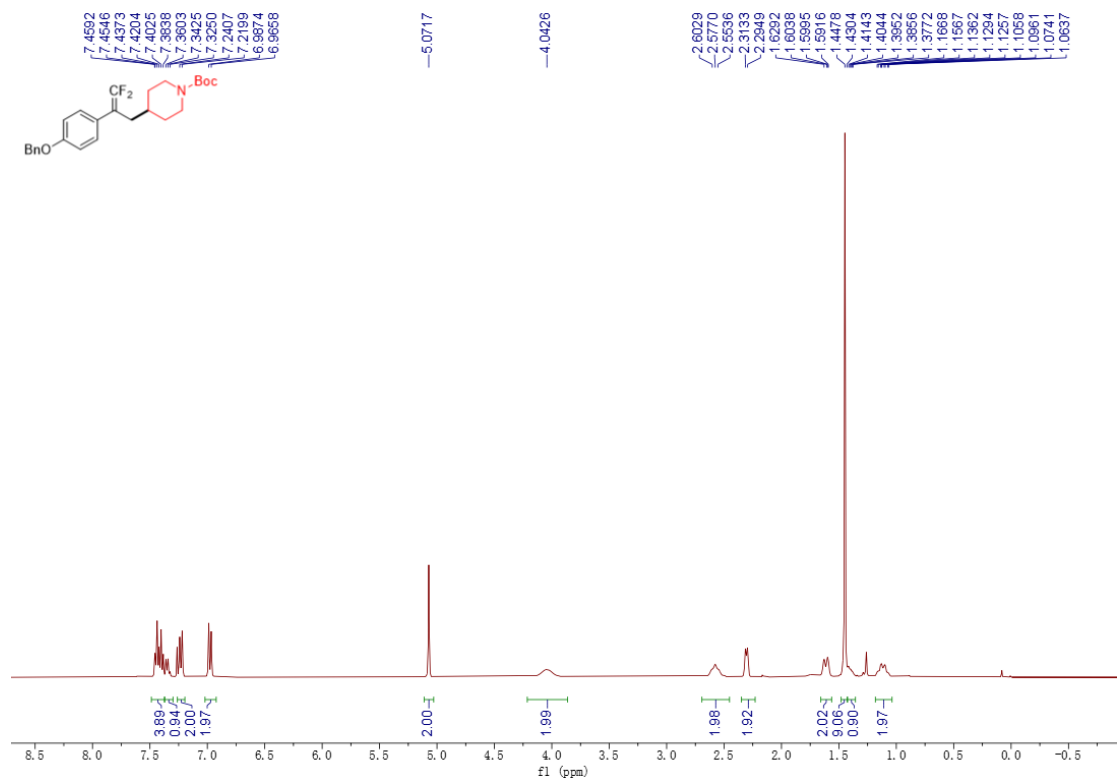

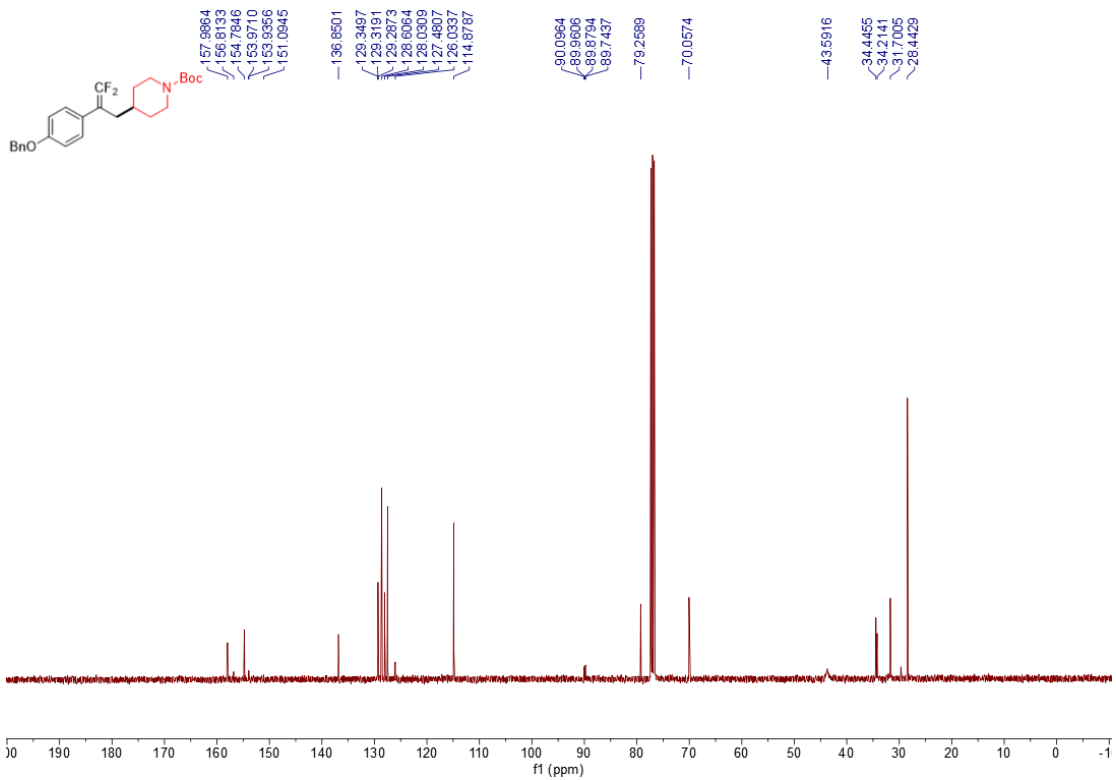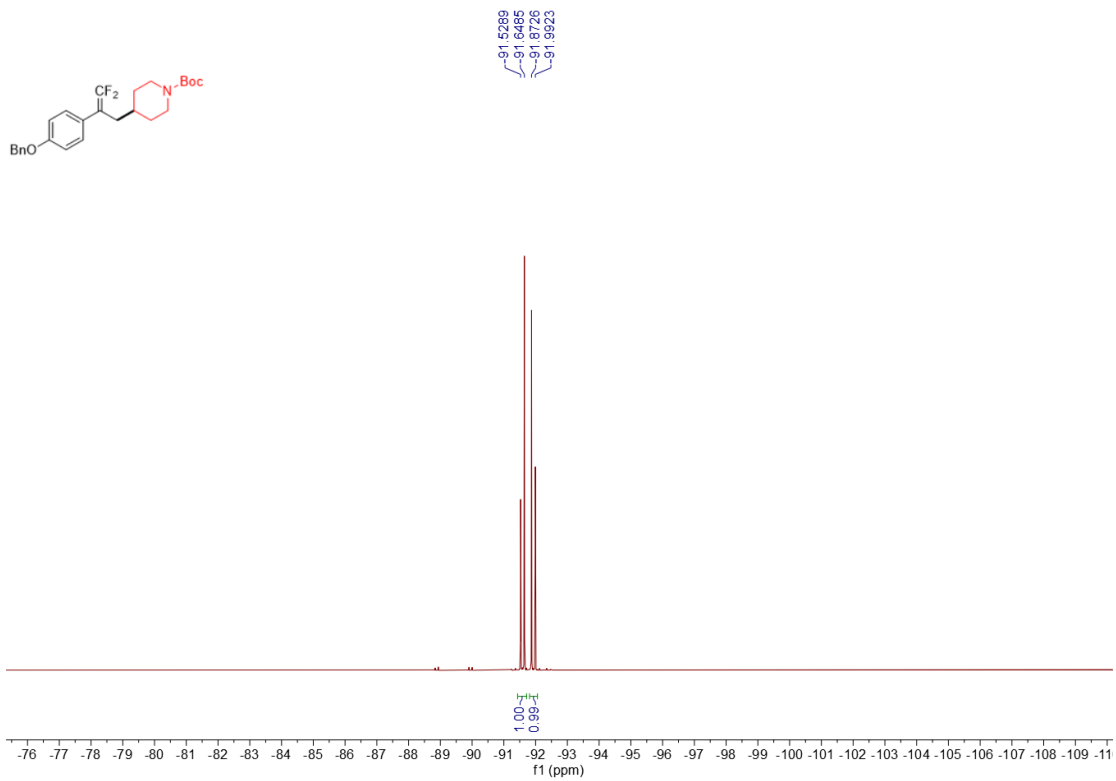

# NMR spectrum of 67

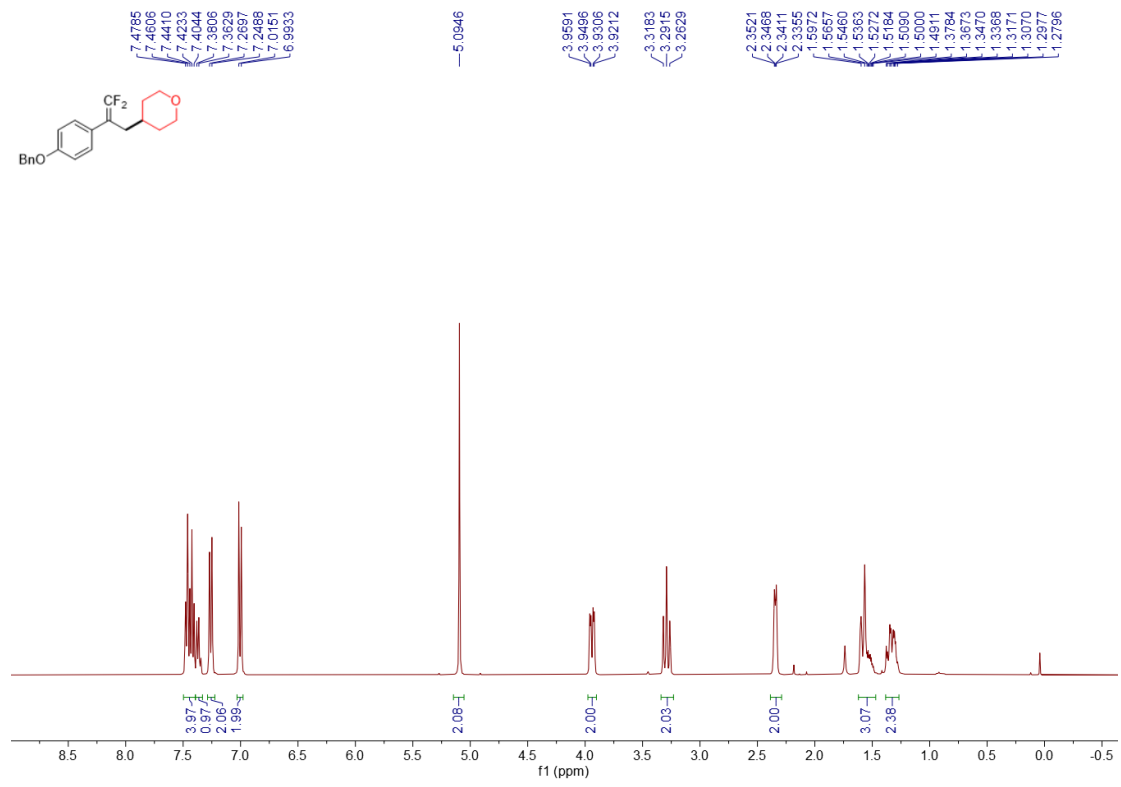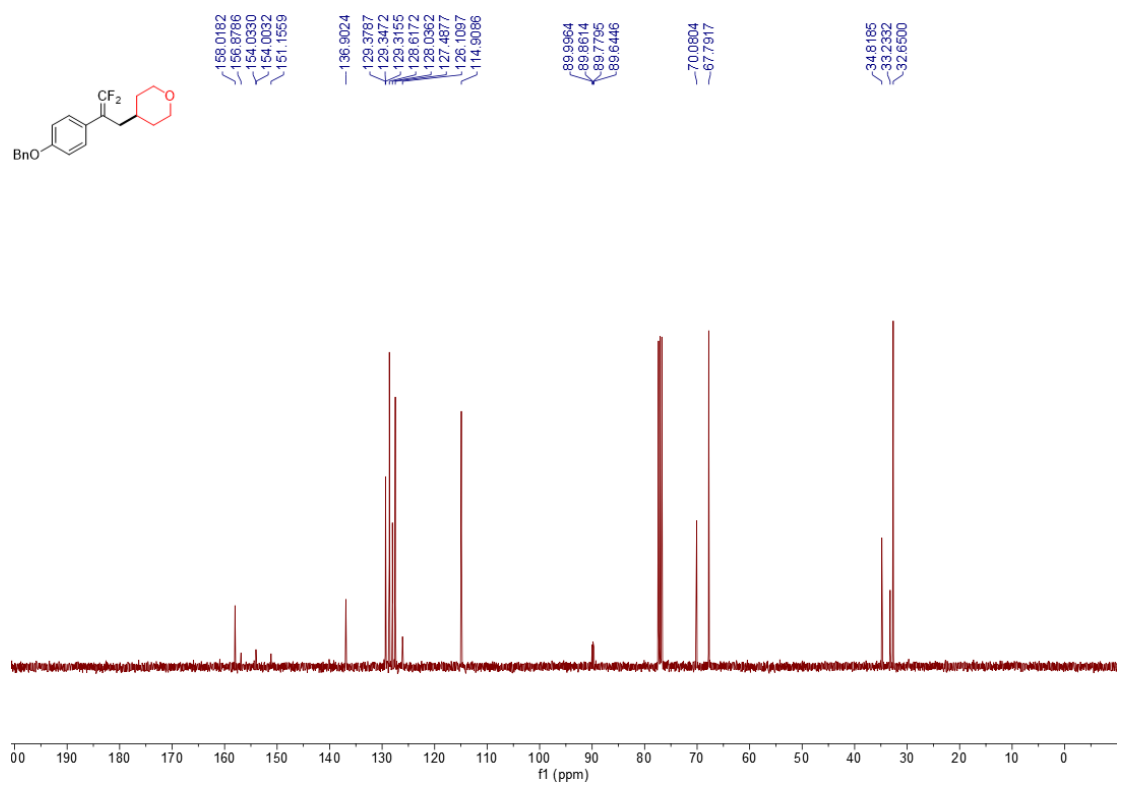

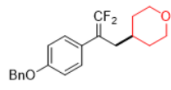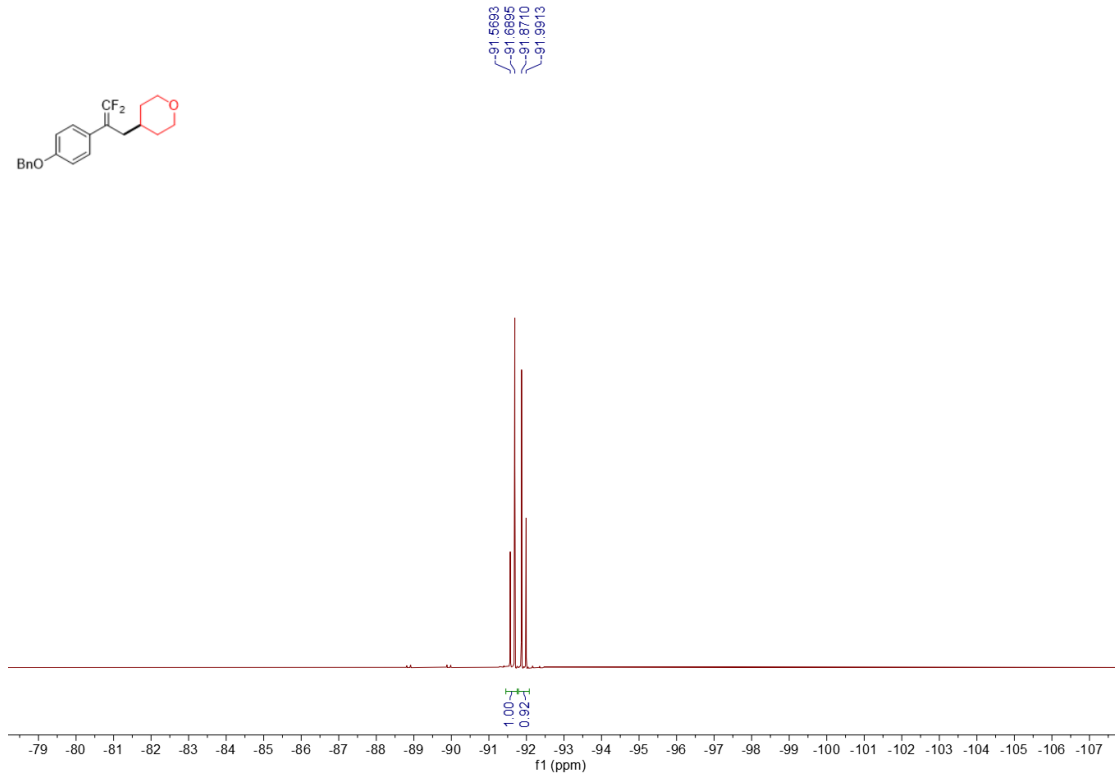

### NMR spectrum of 68

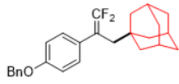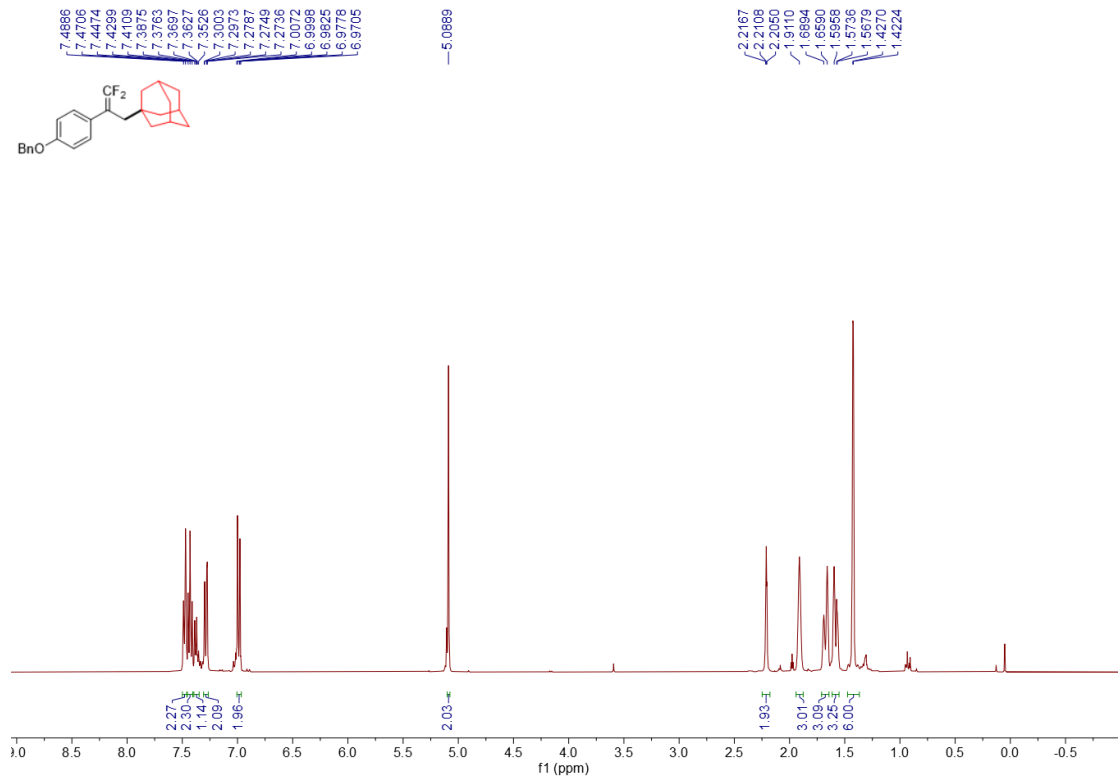

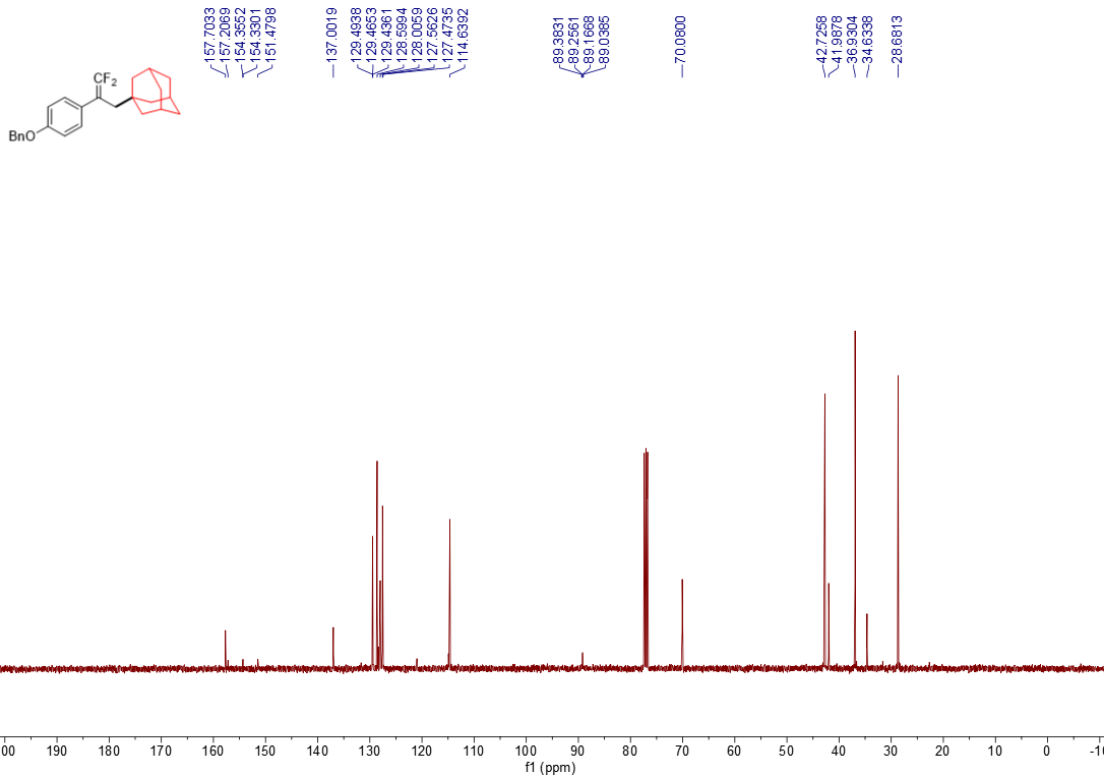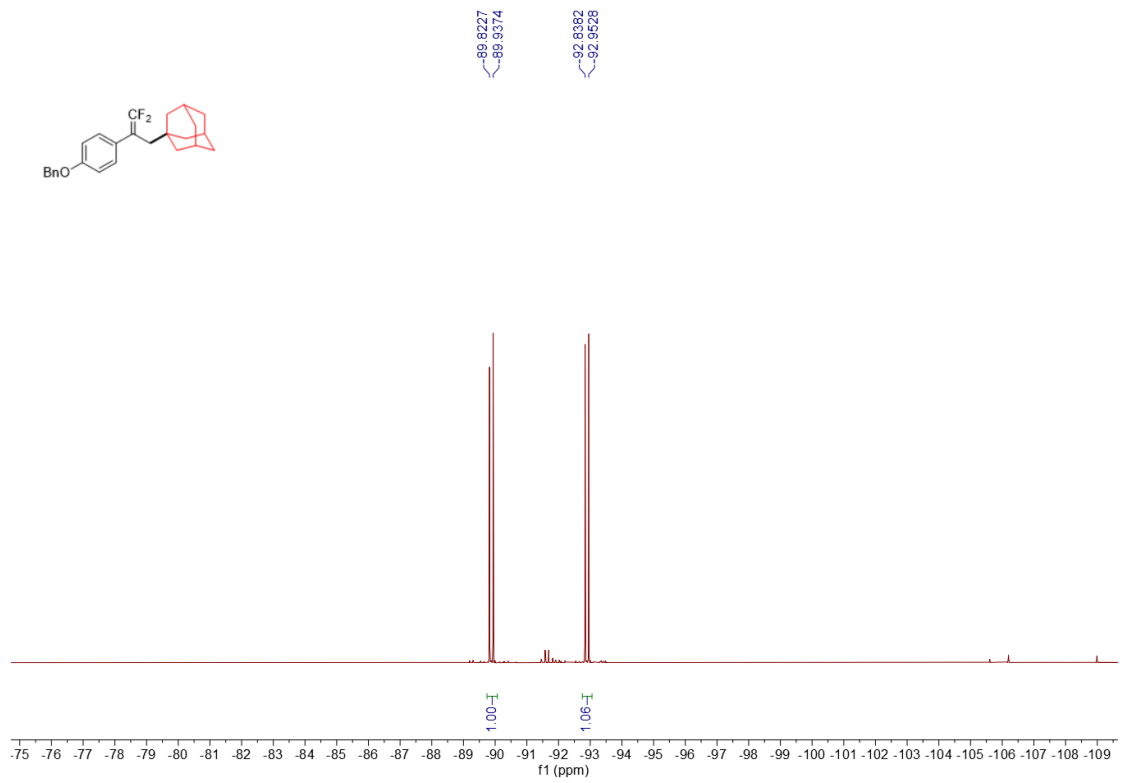



# NMR spectrum of 69

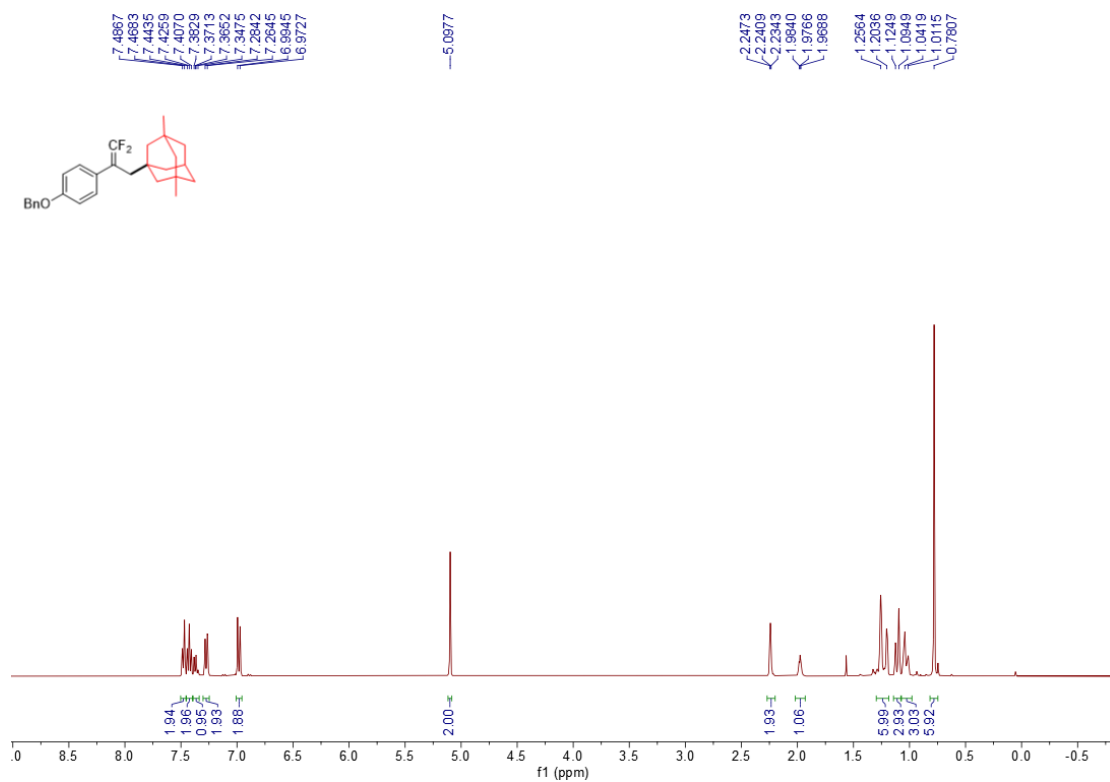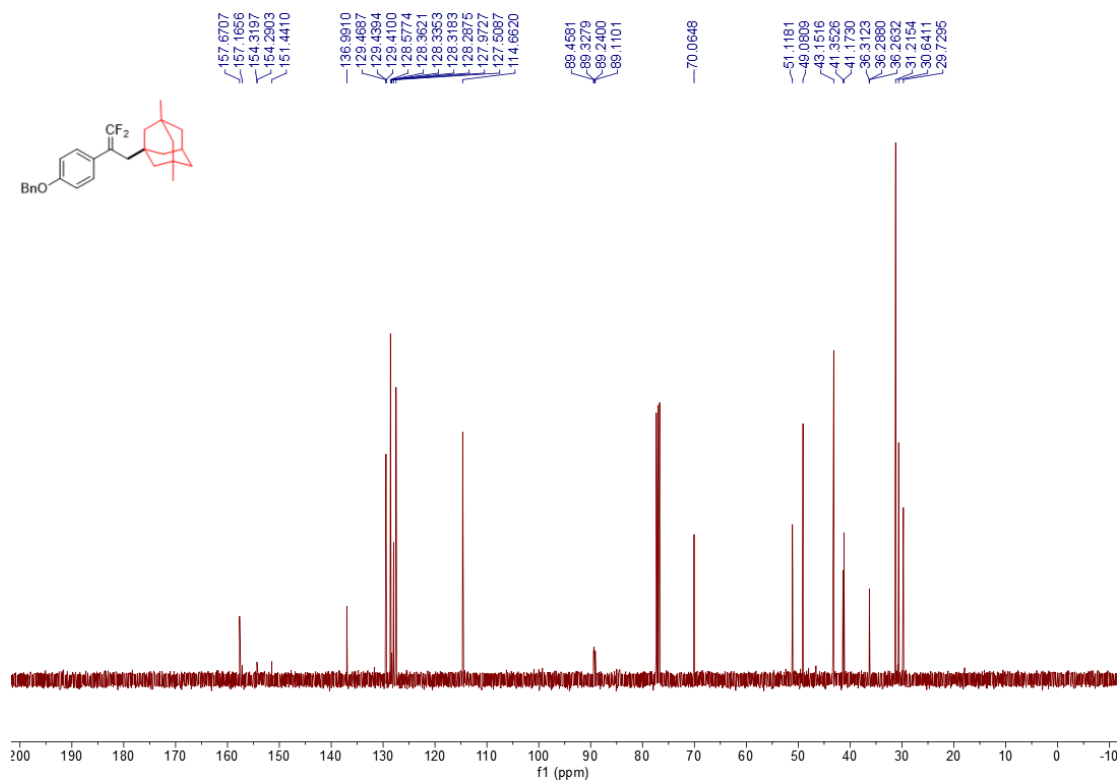

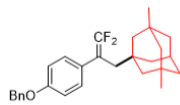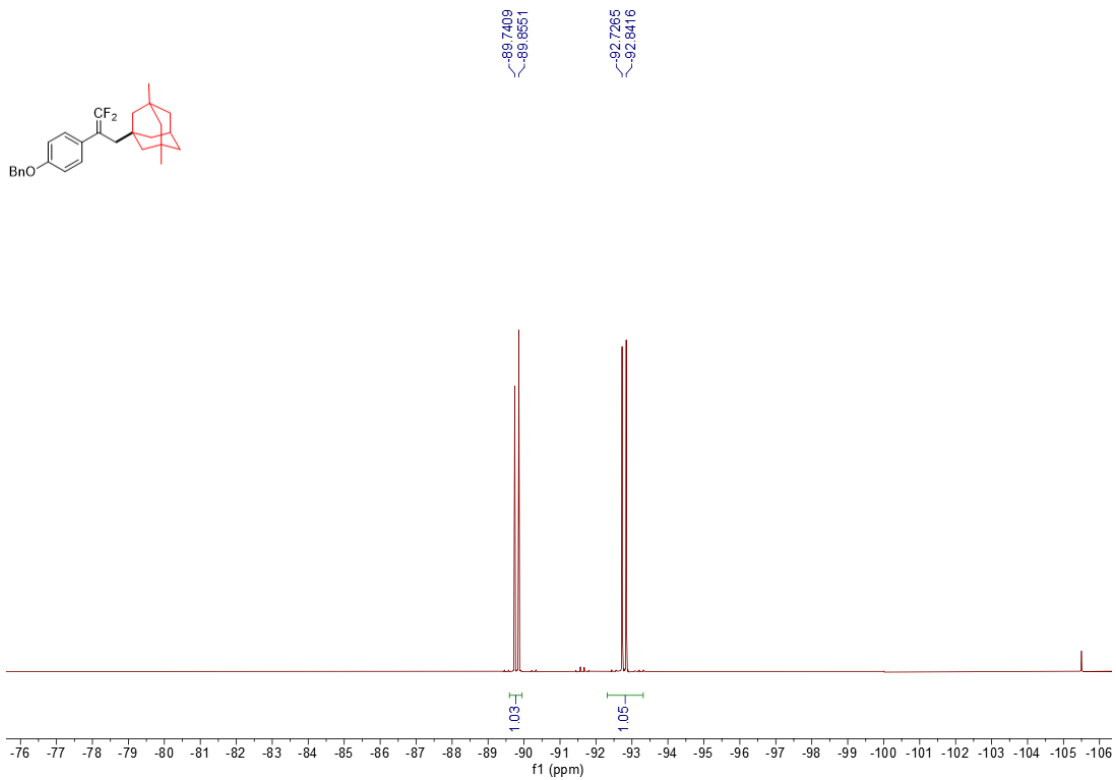

**NMR spectrum of 70**

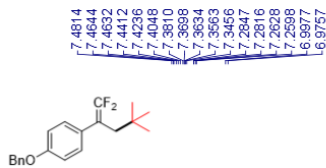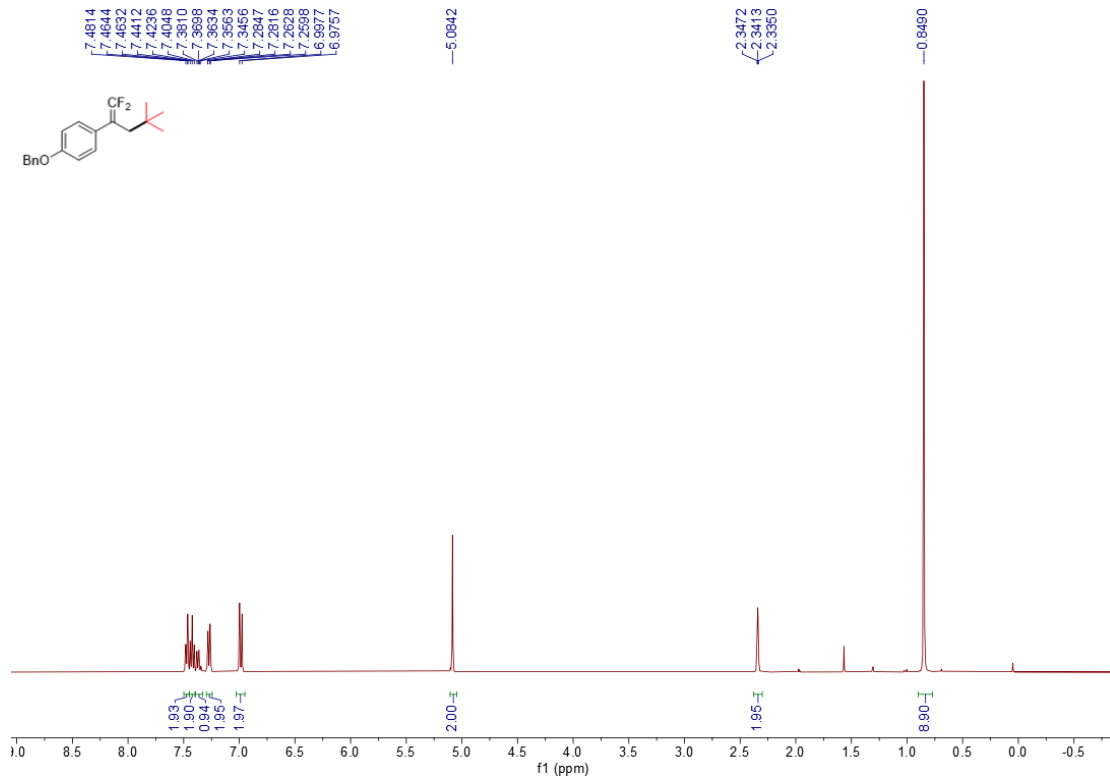

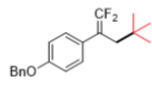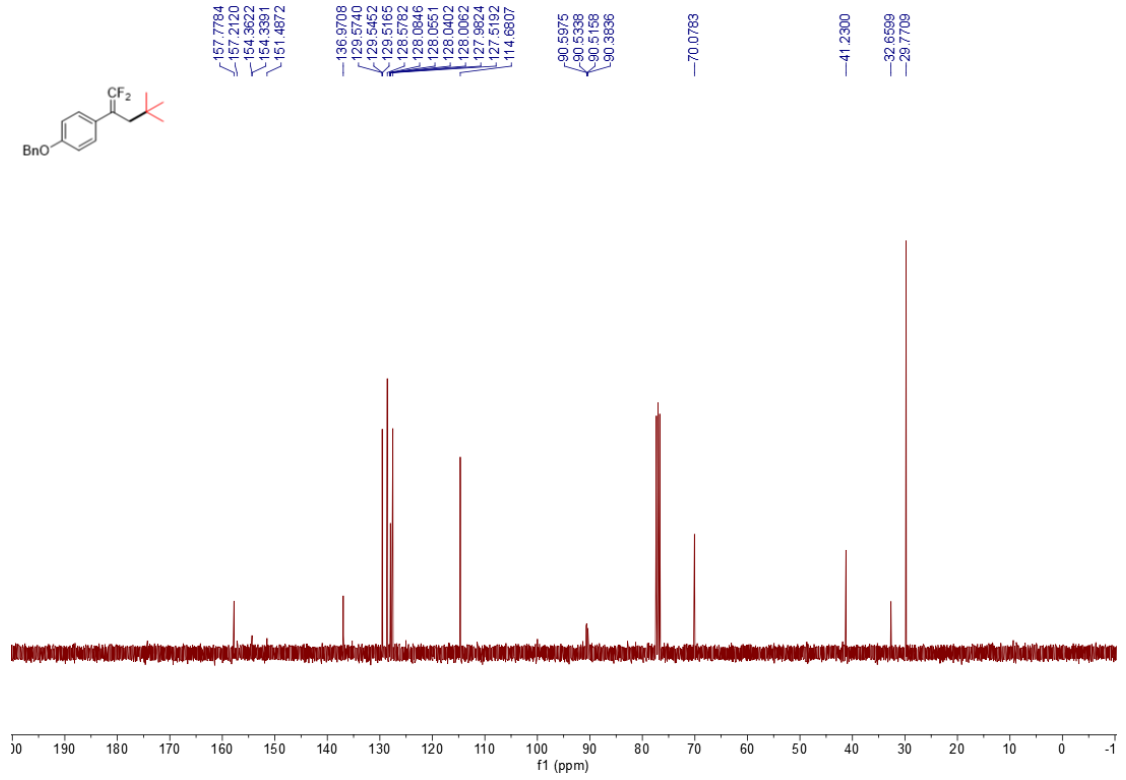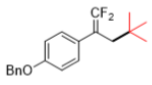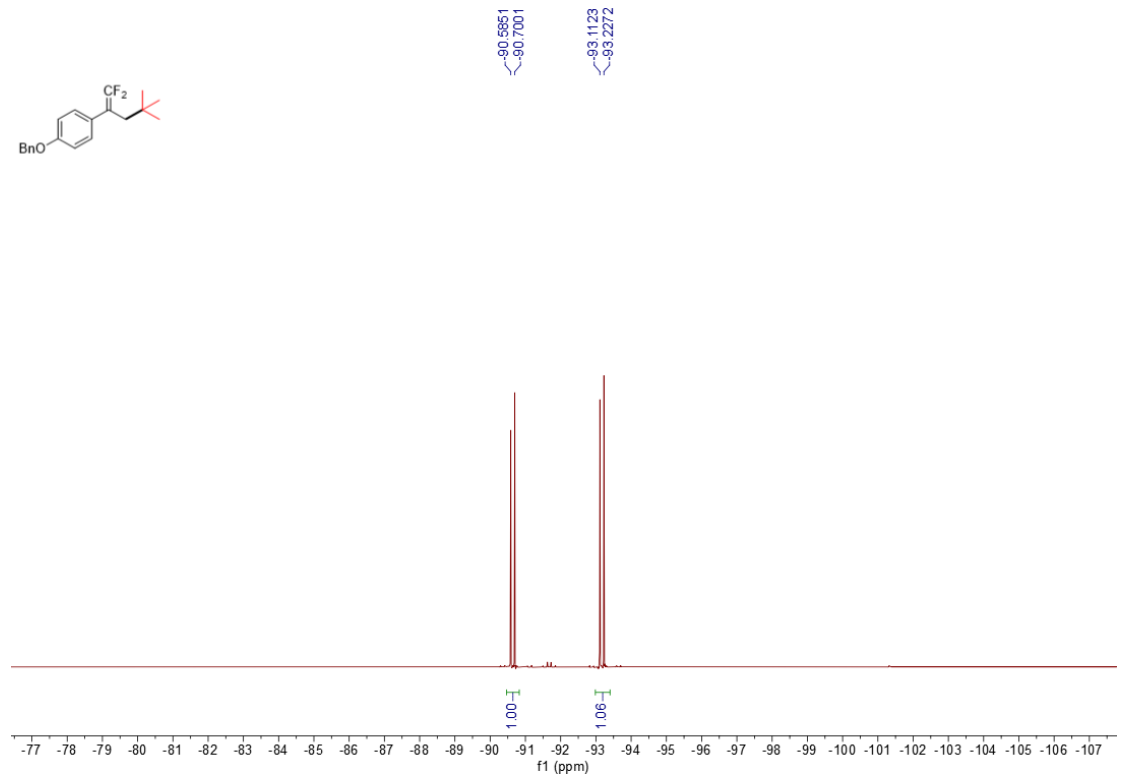

# NMR spectrum of 71

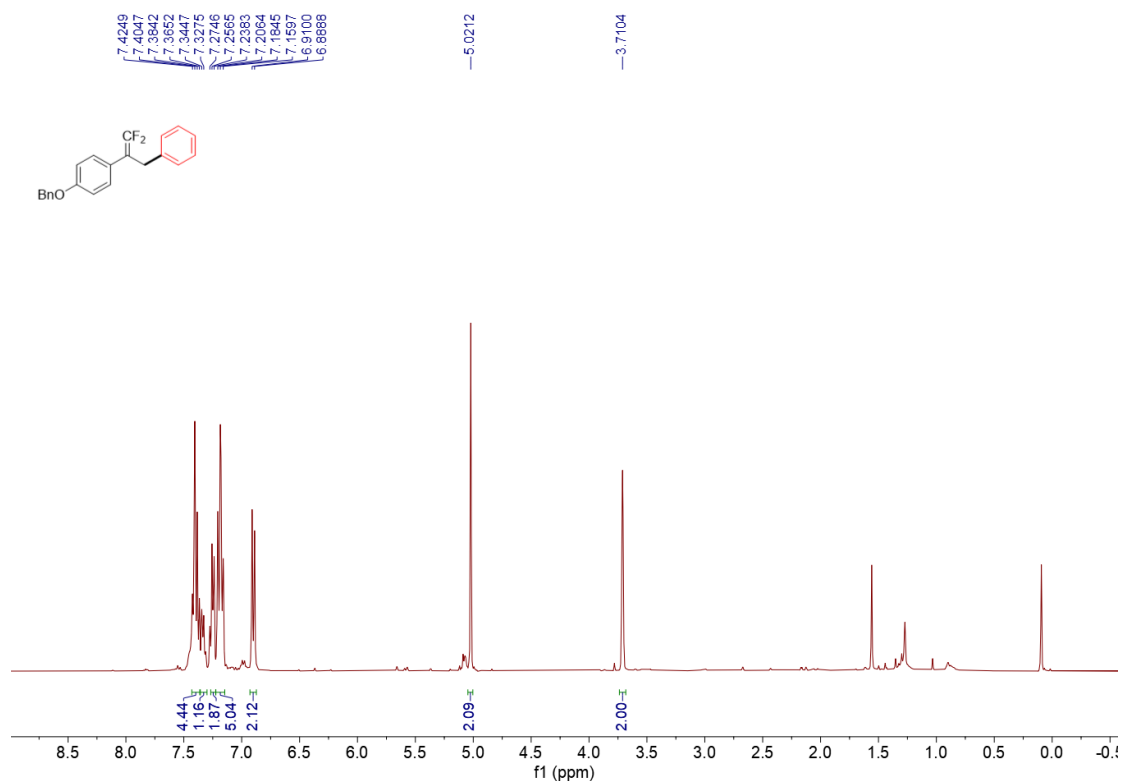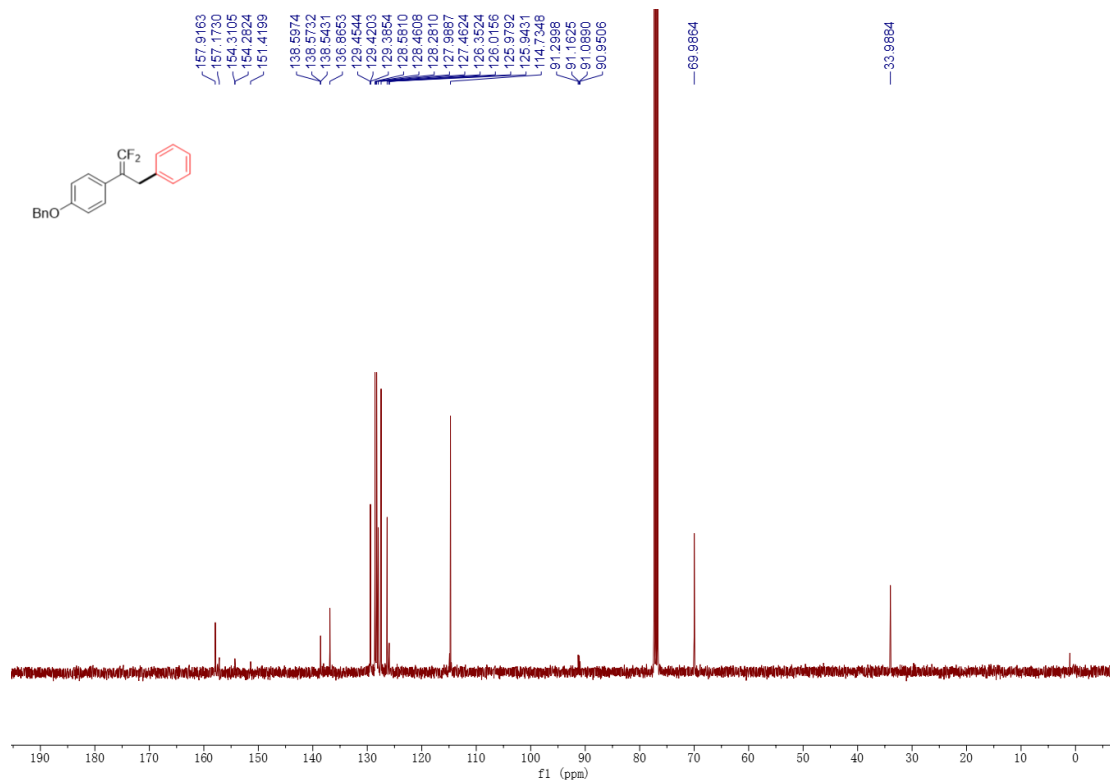

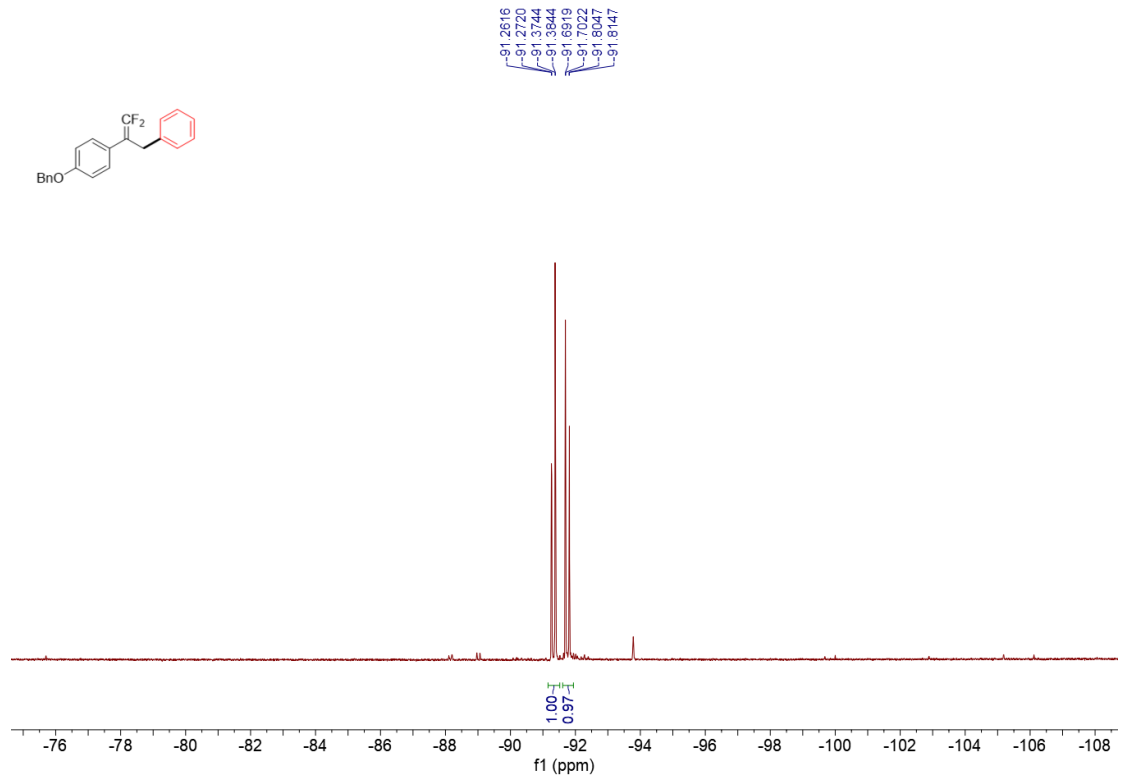

**NMR spectrum of 72**

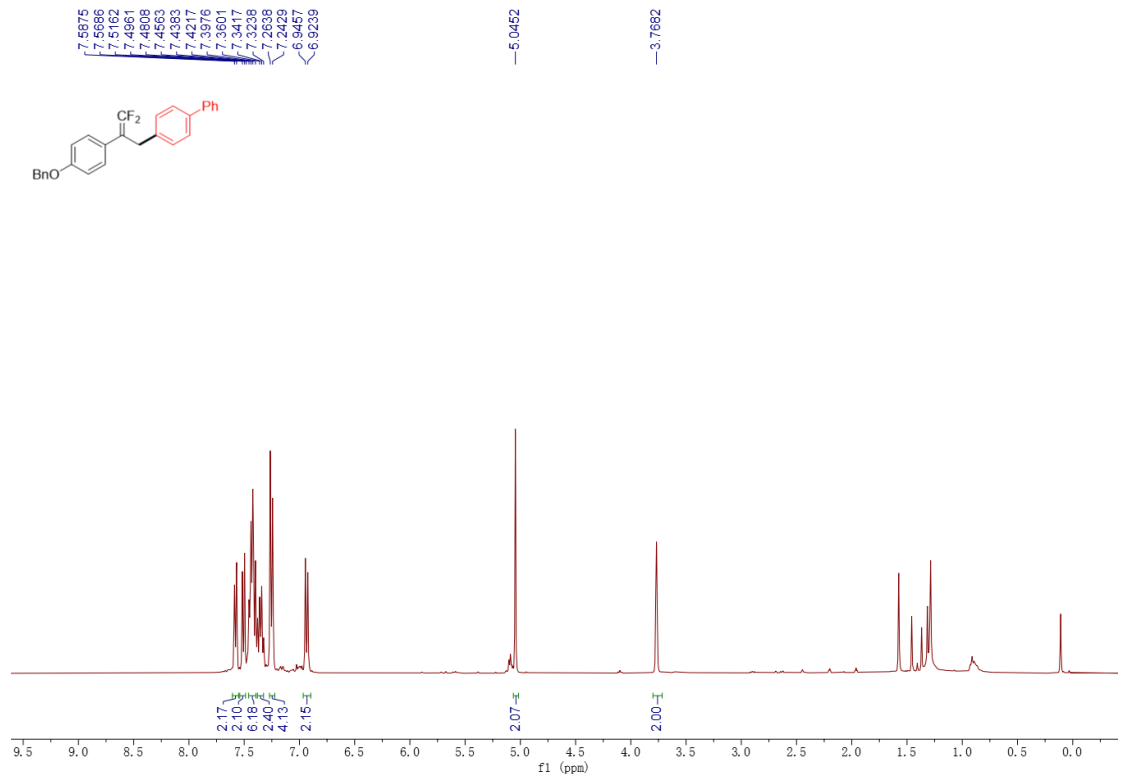

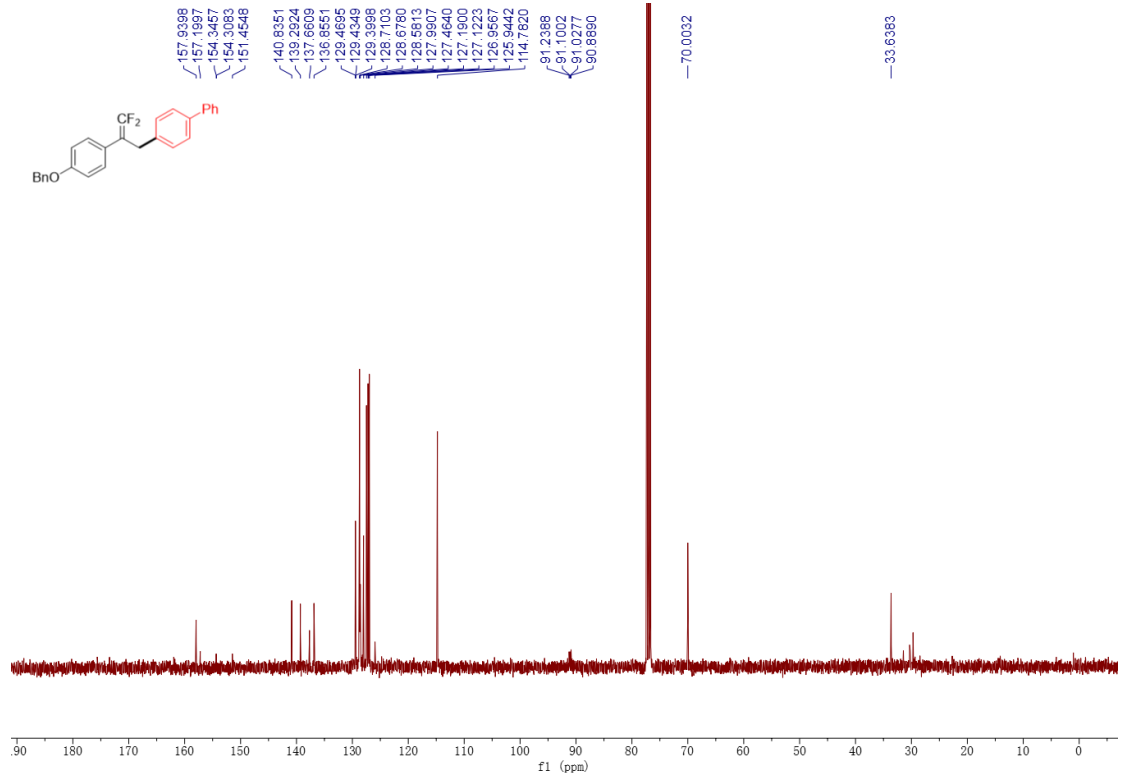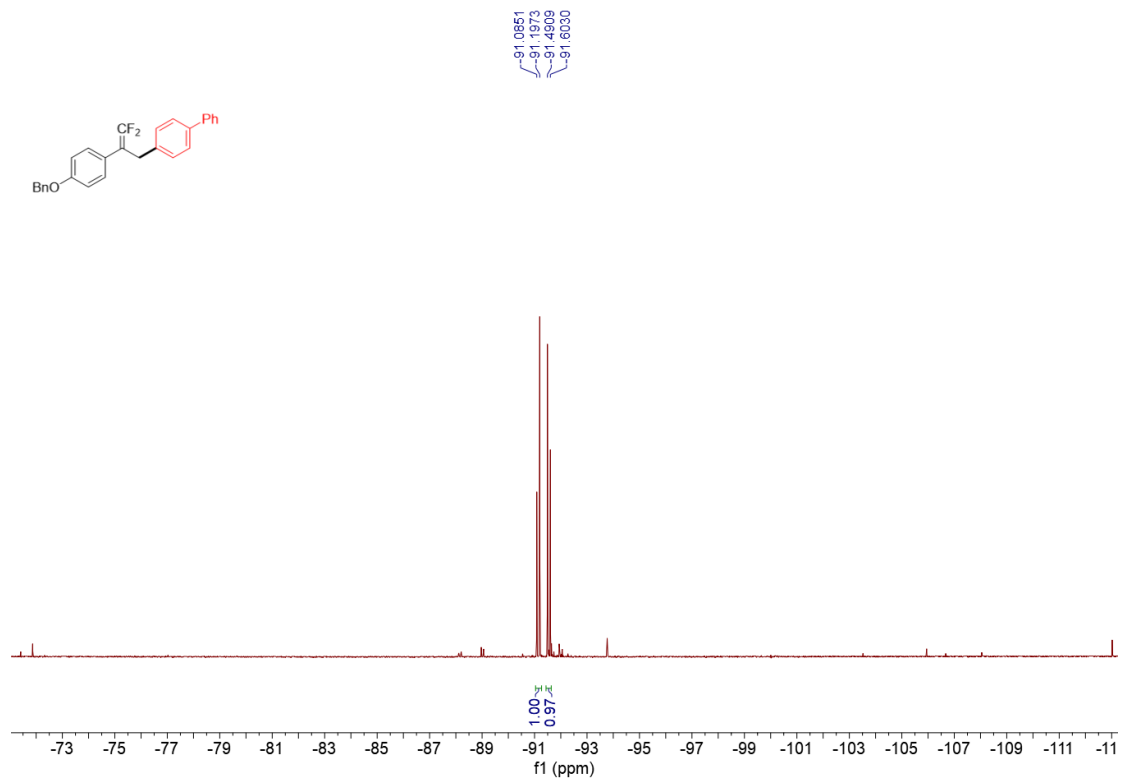

# NMR spectrum of 73

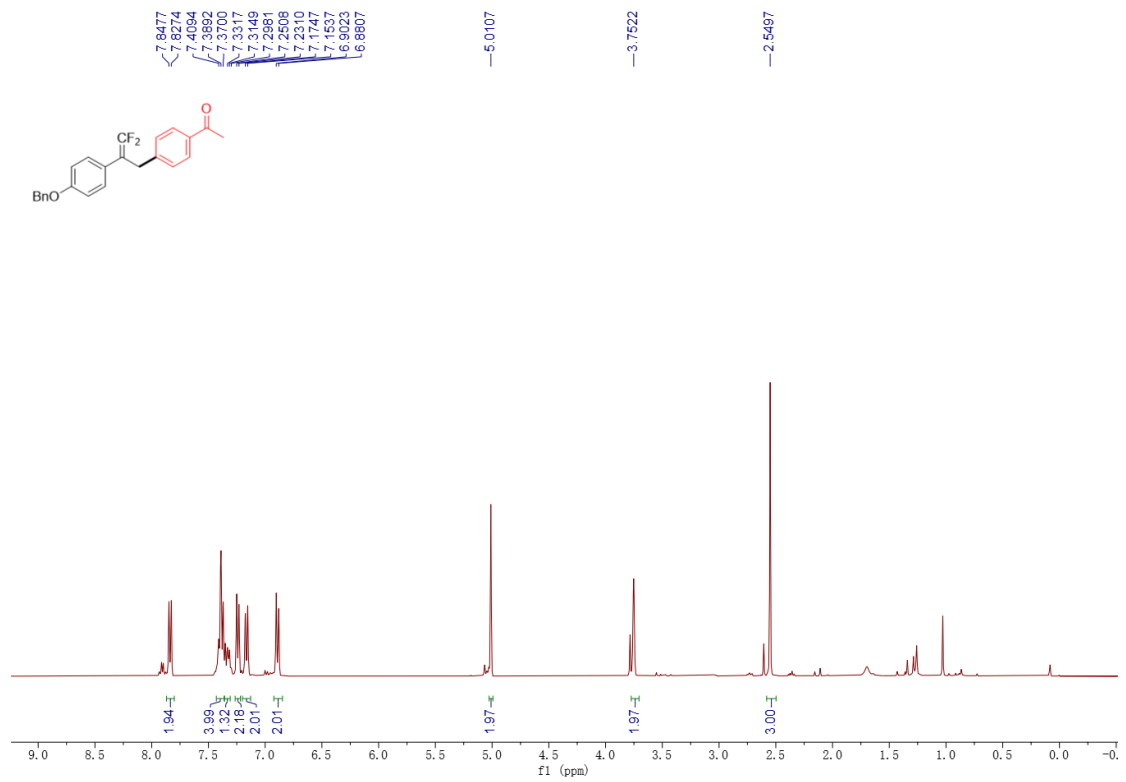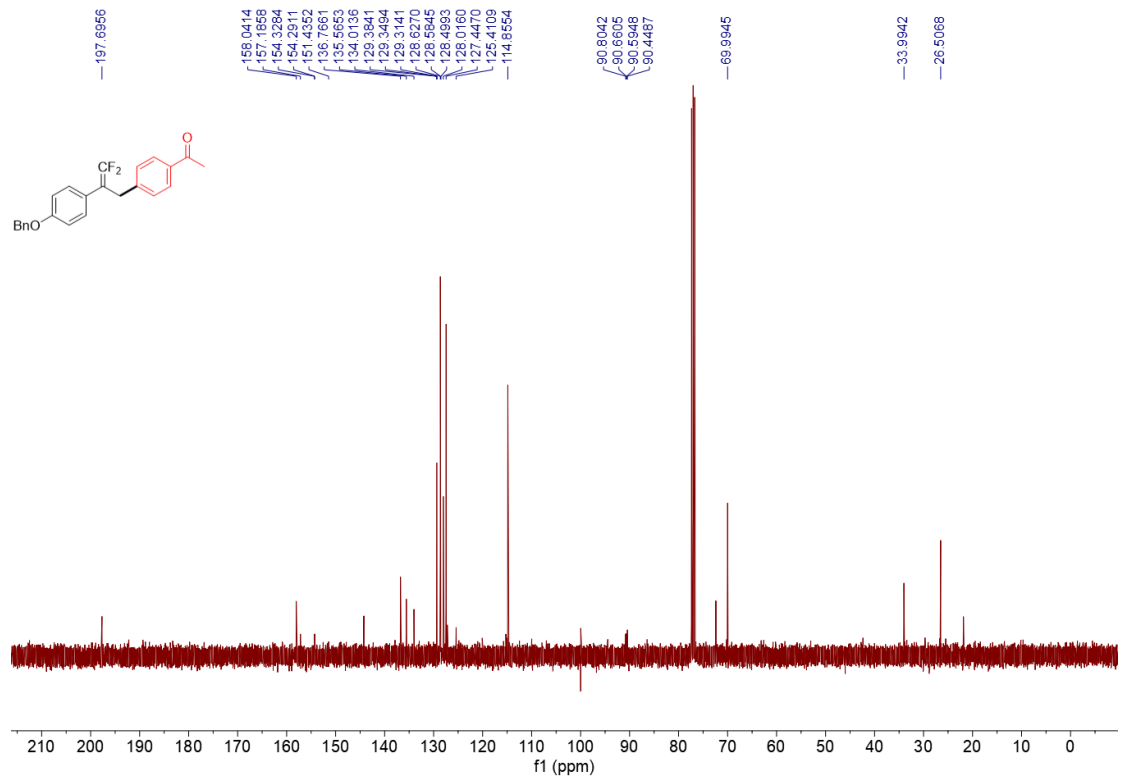

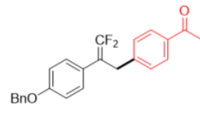

90.6955  
90.8048  
91.0344  
91.1435

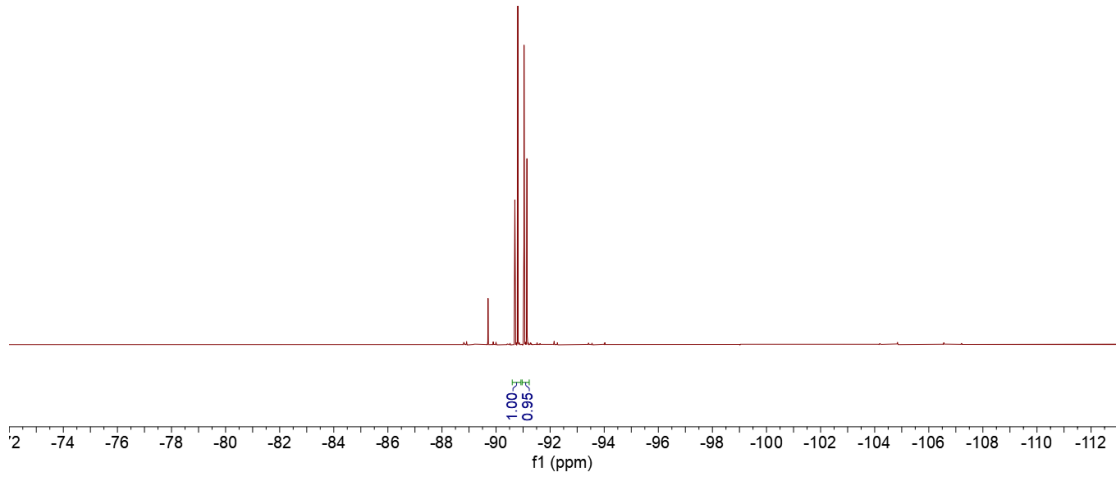

Supplement: d5sc00190k1.pdf [file d5sc00190k1.pdf]
